# Supplementary material
Source: PubMed Central journal article supplement (PMC8052138)
Supplement: EMS115988-supplement-Supp_Info_1_10.pdf [file EMS115988-supplement-Supp_Info_1_10.pdf]

# 1 **Supplementary Information**

## 2 **Contents:**

3

4 **Supplementary Information 1** ..... **2**

5     Bacho Kiro Cave and human remains ..... 2

6 **Supplementary Information 2** ..... **11**

7     Ancient DNA processing, quality controls and contamination estimates ..... 11

8 **Supplementary Information 3** ..... **32**

9     Datasets for downstream analyses ..... 32

10 **Supplementary Information 4** ..... **36**

11     Relatedness, sex determination and Y chromosome analyses ..... 36

12 **Supplementary Information 5** ..... **41**

13     Population relationships ..... 41

14 **Supplementary Information 6** ..... **77**

15     Admixture Graph Modelling ..... 77

16 **Supplementary Information 7** ..... **86**

17     Neandertal ancestry in Bacho Kiro individuals ..... 86

18 **Supplementary Information 8** ..... **108**

19     Neandertal introgressed segments in Bacho Kiro individuals and dating of Neandertal  
20 admixture ..... 108

21 **Supplementary information 9** ..... **123**

22     Sharing of Neandertal introgressed segments between Bacho Kiro and present-day  
23 individuals ..... 123

24 **Supplementary Information 10** ..... **130**

25     Neandertal deserts ..... 130

26

27

## 28 **Supplementary Information 1**

### 29 **Bacho Kiro Cave and human remains**

30

31 Bacho Kiro Cave is located on the northern slope of the Balkan Mountains and 5 km away from  
32 the city of Dryanovo in Bulgaria. First excavated in 1938 by D. Garrod<sup>1</sup> and later in 1970s by  
33 a team led by J. Kozłowski<sup>2</sup>, Bacho Kiro Cave was recently re-opened and excavated by a  
34 research team led by the National Archaeological Institute with Museum in Sofia and the  
35 Department of Human Evolution at the Max Planck Institute for Evolutionary Anthropology in  
36 Leipzig<sup>3,4</sup>. New excavations focused on two sectors adjacent to the area excavated in 1970s, the  
37 Main Sector and the Niche 1 as detailed previously<sup>3,4</sup>. The archaeological sequence of the cave  
38 spans the late Middle Palaeolithic (MP) and the early Upper Palaeolithic (UP), with an  
39 archaeologically rich assemblage in Layer I<sup>3,4</sup> recognized as a variant of the Initial Upper  
40 Palaeolithic (IUP)<sup>5</sup>.

41 Five human specimens from the new excavations were found in a direct association with  
42 an IUP assemblage in Bacho Kiro Cave (Fig. 1)<sup>3</sup>. A human lower molar (*F6-620*) was found in  
43 the upper part of the Layer J in the Main Sector of the cave and four bone fragments (*AA7-738*,  
44 *BB7-240*, *CC7-2289* and *CC7-335*) were found in the Layer I in the Niche 1 sector. These  
45 specimens were directly radiocarbon dated to between 45,930 and 42,580 cal. BP<sup>3,4</sup> (re-  
46 calibrated with OxCal 4.4.2<sup>6</sup> and IntCal20<sup>7</sup>, Tab. S1.1). Their mitochondrial genomes (mtDNA)  
47 are attributed to modern humans, suggesting that they are the oldest modern humans in Europe  
48 recovered to date<sup>3</sup>.

49 Specimens from Kent's Cavern in United Kingdom<sup>8</sup> and Grotta del Cavallo in Italy<sup>9</sup>  
50 have been claimed to represent the earliest evidence of modern humans in western Europe (Fig.  
51 1). However their dates are based on the archaeological context and the exact provenance of  
52 these specimens has been extensively debated<sup>10,11</sup>. Modern human remains older than 40,000  
53 cal. BP in Europe are extremely sparse (Fig. 1)<sup>12-14</sup>. Moreover, genome-wide data has been  
54 retrieved for only three modern humans from Eurasia that are older than this<sup>15-17</sup> and each of  
55 these individuals was found outside of any archaeological context.

56 The archaeological sites with IUP assemblages span an area from North Africa,  
57 southwest Asia, eastern and central Europe to north China<sup>18,19</sup> (Fig. 1, Tab. S1.2), and have  
58 been suggested to be associated with the first wave of modern human dispersals out-of-Africa<sup>19</sup>.  
59 However, human remains found in the IUP context to date are relatively few<sup>12,20-22</sup>, highlighting  
60 the relevance of Bacho Kiro Cave IUP human finds<sup>3,4</sup>.

61 Two additional bone fragments were found in Layer B in the Main Sector of Bacho Kiro  
62 Cave (F6-597) and in the collections of the 1970s excavations in a position corresponding to  
63 the interface of Layers B/C (BK1653). These two specimens were directly dated to 36,320-  
64 35,600 cal. BP and 35,290-34,610 cal. BP<sup>3,4</sup>, respectively (re-calibrated with OxCal 4.4.2<sup>6</sup> and  
65 IntCal20<sup>7</sup>, Tab. S1.1). Although the lithic assemblages from these layers are sparse, they are  
66 likely to be Aurignacian<sup>3,4</sup>. Thus, there is ~10,000 years between the two groups of human  
67 remains found in the Bacho Kiro Cave. Even though there are more individuals that are older  
68 than 30,000 cal. BP and from whom genome-wide data has been retrieved (Fig. 1, Tab. S1.1)<sup>23-</sup>  
69 <sup>26</sup>, this genetic record is still quite fragmentary compared to more recent timeperiods  
70 ([https://reich.hms.harvard.edu/downloadable-genotypes-present-day-and-ancient-dna-data-](https://reich.hms.harvard.edu/downloadable-genotypes-present-day-and-ancient-dna-data-compiled-published-papers/)  
71 [compiled-published-papers/](https://reich.hms.harvard.edu/downloadable-genotypes-present-day-and-ancient-dna-data-compiled-published-papers/)).

72

### 73 **References SI1:**

- 74 1 Garrod, D. A., Howe, B. & Gaul, J. Excavations in the cave of Bacho Kiro, north-east  
75 Bulgaria. *Bulletin of the American School of Prehistoric research* **15**, 46-76 (1939).
- 76 2 Kozłowski, J. K. & Ginter, B. Excavation in the Bacho Kiro Cave (Bulgaria): Final  
77 Report. *Państwowe Wydawnictwo Naukowe* (1982).
- 78 3 Hublin, J.-J. et al. Initial Upper Palaeolithic Homo sapiens from Bacho Kiro Cave,  
79 Bulgaria. *Nature* **581**, 299-302, doi:10.1038/s41586-020-2259-z (2020).
- 80 4 Fewlass, H. et al. A 14 C chronology for the Middle to Upper Palaeolithic transition at  
81 Bacho Kiro Cave, Bulgaria. *Nat. Ecol. Evol.* **4**, 794-801, doi: 10.1038/s41559-020-  
82 1136-3 (2020).
- 83 5 Tsanova, T. & Borders, J. The Humanized Mineral World: Towards Social and  
84 Symbolic Evaluation of Prehistoric Technologies in South Eastern Europe. *Proceedings*  
85 *of the ESF workshop Sofia 3-6 September 2003*, 1-129 (2003).
- 86 6 Ramsey, C. B. Bayesian analysis of radiocarbon dates. *Radiocarbon* **51**, 337-360  
87 (2009).
- 88 7 Reimer, P. J. et al. The IntCal20 Northern Hemisphere radiocarbon age calibration  
89 curve (0–55 cal kBP). *Radiocarbon* **62**, 725-757 (2020).
- 90 8 Higham, T. et al. The earliest evidence for anatomically modern humans in  
91 northwestern Europe. *Nature* **479**, 521-524, doi: 10.1038/nature10484 (2011).
- 92 9 Benazzi, S. et al. Early dispersal of modern humans in Europe and implications for  
93 Neanderthal behaviour. *Nature* **479**, 525-528, doi:10.1038/nature10617 (2011).

- 94 10 White, M. & Pettitt, P. Ancient digs and modern myths: The age and context of the  
95 Kent's Cavern 4 maxilla and the earliest Homo sapiens specimens in Europe. *European*  
96 *Journal of Archaeology* **15**, 392-420 (2012).
- 97 11 Zilhão, J., Banks, W. E., d'Errico, F. & Gioia, P. Analysis of site formation and  
98 assemblage integrity does not support attribution of the Uluzzian to modern humans at  
99 Grotta del Cavallo. *PLoS One* **10**, e0131181 (2015).
- 100 12 Hublin, J.-J. The modern human colonization of western Eurasia: when and where?  
101 *Quat. Sci. Rev.* **118**, 194-210, doi:10.1016/j.quascirev.2014.08.011 (2015).
- 102 13 Benazzi, S. *et al.* The makers of the Protoaurignacian and implications for Neandertal  
103 extinction. *Science* **348**, 793-796, doi:10.1126/science.aaa2773 (2015).
- 104 14 Trinkaus, E. *et al.* An early modern human from the Peștera cu Oase, Romania. *Proc.*  
105 *Natl. Acad. Sci. U.S.A.* **100**, 11231-11236, doi: 10.1073/pnas.2035108100 (2003).
- 106 15 Fu, Q. *et al.* Genome sequence of a 45,000-year-old modern human from western  
107 Siberia. *Nature* **514**, 445-449, doi:10.1038/nature13810 (2014).
- 108 16 Fu, Q. *et al.* An early modern human from Romania with a recent Neanderthal ancestor.  
109 *Nature* **524**, 216-219, doi:10.1038/nature14558 (2015).
- 110 17 Yang, M. A. *et al.* 40,000-Year-Old Individual from Asia Provides Insight into Early  
111 Population Structure in Eurasia. *Curr. Biol.* **27**, 3202-3208.e9, doi:  
112 10.1016/j.cub.2017.09.030 (2017).
- 113 18 Kuhn, S. L. & Zwyns, N. Rethinking the initial Upper Paleolithic. *Quat. Int.* **347**, 29-  
114 38, doi: 10.1016/j.quaint.2014.05.040 (2014).
- 115 19 Müller, U. C. *et al.* The role of climate in the spread of modern humans into Europe.  
116 *Quat. Sci. Rev.* **30**, 273-279 (2011).
- 117 20 Kuhn, S. L. *et al.* The early upper paleolithic occupations at Üçağızlı cave (Hatay,  
118 Turkey). *Journal of human evolution* **56**, 87-113 (2009).
- 119 21 Copeland, L. & Yazbeck, C. Inventory of stone age sites in Lebanon. Part III, additions  
120 and revisions, 1967-2001. *Mélanges de l'Université Saint-Joseph* **55**, 119-325 (1997).
- 121 22 Yazbeck, C. Le Paléolithique du Liban: bilan critique. *Paléorient*, 111-126 (2004).
- 122 23 Seguin-Orlando, A. *et al.* Genomic structure in Europeans dating back at least 36,200  
123 years. *Science* **346**, 1113-1118, doi:10.1126/science.aaa0114 (2014).
- 124 24 Fu, Q. *et al.* The genetic history of Ice Age Europe. *Nature* **534**, 200-205,  
125 doi:10.1038/nature17993 (2016).
- 126 25 Sikora, M. *et al.* Ancient genomes show social and reproductive behavior of early Upper  
127 Paleolithic foragers. *Science* **358**, 659-662, doi: 10.1126/science.aao1807 (2017).

- 128 26 Sikora, M. *et al.* The population history of northeastern Siberia since the Pleistocene.  
129 *Nature* **570**, 182-188, doi: 10.1038/s41586-019-1279-z (2019).
- 130 27 Fu, Q. *et al.* DNA analysis of an early modern human from Tianyuan Cave, China. *Proc.*  
131 *Natl. Acad. Sci. U.S.A.* **110**, 2223-2227, doi:10.1073/pnas.1221359110 (2013).
- 132 28 Marom, A., McCullagh, J. S., Higham, T. F., Sinitsyn, A. A. & Hedges, R. E. Single  
133 amino acid radiocarbon dating of Upper Paleolithic modern humans. *Proc. Natl. Acad.*  
134 *Sci. U.S.A.* **109**, 6878-6881 (2012).
- 135 29 Posth, C. *et al.* Pleistocene Mitochondrial Genomes Suggest a Single Major Dispersal  
136 of Non-Africans and a Late Glacial Population Turnover in Europe. *Curr. Biol.* **26**, 827-  
137 833, doi:10.1016/j.cub.2016.01.037 (2016).
- 138 30 Soficaru, A., Doboş, A. & Trinkaus, E. Early modern humans from the Peştera Muierii,  
139 Baia de Fier, Romania. *Proc. Natl. Acad. Sci. U.S.A.* **103**, 17196-17201 (2006).
- 140 31 Soficaru, A., Petrea, C., Doboş, A. & Trinkaus, E. The human cranium from the Peştera  
141 Cioclovina Uscată, Romania: context, age, taphonomy, morphology, and  
142 paleopathology. *Current Anthropology* **48**, 611-619 (2007).
- 143 32 Sinitsyn, A. & Hoffecker, J. Radiocarbon dating and chronology of the Early Upper  
144 Paleolithic at Kostenki. *Quaternary International* **152**, 164-174 (2006).
- 145 33 di Cesnola, A. P. L'Aurignacien et le Gravettien ancien de la grotte Paglicci au Mont  
146 Gargano. *L'anthropologie* **110**, 355-370 (2006).
- 147 34 Fewlass, H. *et al.* Direct radiocarbon dates of mid Upper Palaeolithic human remains  
148 from Dolní Věstonice II and Pavlov I, Czech Republic. *Journal of Archaeological*  
149 *Science: Reports* **27**, 102000 (2019).
- 150 35 Simon, U., Händel, M., Einwögerer, T. & Neugebauer-Maresch, C. The archaeological  
151 record of the Gravettian open air site Krems-Wachtberg. *Quaternary International* **351**,  
152 5-13 (2014).
- 153 36 Richter, D., Tostevin, G. & Škrdla, P. Bohunician technology and thermoluminescence  
154 dating of the type locality of Brno-Bohunice (Czech Republic). *Journal of Human*  
155 *evolution* **55**, 871-885 (2008).
- 156 37 Richter, D., Tostevin, G., Škrdla, P. & Davies, W. New radiometric ages for the Early  
157 Upper Palaeolithic type locality of Brno-Bohunice (Czech Republic): comparison of  
158 OSL, IRSL, TL and 14C dating results. *Journal of Archaeological science* **36**, 708-720  
159 (2009).

- 160 38 Nejman, L. *et al.* New chronological evidence for the Middle to Upper Palaeolithic  
161 transition in the Czech Republic and Slovakia: new optically stimulated luminescence  
162 dating results. *Archaeometry* **53**, 1044-1066 (2011).
- 163 39 Tsanova, T. Les débuts du Paléolithique supérieur dans l'Est des Balkans. *Réflexion à*  
164 *partir des* (2008).
- 165 40 Škrdla, P. & Nikolajev, P. Preliminary comparison of Kulychivka (lower layer) and the  
166 Moravian Bohunician. *Матеріали і дослідження з археології Прикарпаття і*  
167 *Волині*, 78-96 (2014).
- 168 41 Škrdla, P., Sytnyk, O. & Koropets'kyi, R. New observations concerning Kulychivka  
169 site, layer IV. *Матеріали і дослідження з археології Прикарпаття і Волині*, 15-25  
170 (2016).
- 171 42 Gladilin, V. & Demidenko, Y. E. Upper Palaeolithic stone tool complexes from  
172 Korolevo. *Anthropologie (1962-)*, 143-178 (1989).
- 173 43 Koulakovska, L., Usik, V. & Haesaerts, P. Early paleolithic of korolevo site  
174 (Transcarpathia, Ukraine). *Quaternary International* **223**, 116-130 (2010).
- 175 44 Hoffecker, J. F. *et al.* The dating of a Middle Paleolithic blade industry in southern  
176 Russia and its relationship to the Initial Upper Paleolithic. *Journal of Paleolithic*  
177 *Archaeology* **2**, 381-417 (2019).
- 178 45 Kuhn, S. L. Questions of complexity and scale in explanations for cultural transitions  
179 in the Pleistocene: a case study from the early Upper Paleolithic. *Journal of*  
180 *Archaeological Method and Theory* **20**, 194-211 (2013).
- 181 46 Kuhn, S. L., Stiner, M. C. & Güleç, E. Initial Upper Palaeolithic in south-central Turkey  
182 and its regional context: a preliminary report. *ANTIQUITY-OXFORD* **73**, 505-517  
183 (1999).
- 184 47 Ploux, S. & Soriano, S. Umm el Tlel, une séquence du Paléolithique supérieur en Syrie  
185 centrale. Industries lithiques et chronologie culturelle. *Paléorient*, 5-34 (2003).
- 186 48 Richter, D., Rink, W., Schwarcz, H., Julig, P. & Schroeder, H. The Middle to Upper  
187 Palaeolithic transition in the Levant and new thermoluminescence dates for a Late  
188 Mousterian assemblage from Jerf Al-Ajla Cave (Syria). *Paléorient*, 29-46 (2001).
- 189 49 Pastoors, A., Weniger, G.-C. & Kegler, J. F. The Middle-Upper Palaeolithic transition  
190 at Yabroud II (Syria). A re-evaluation of the lithic material from the Rust excavation.  
191 *Paléorient*, 47-65 (2008).
- 192 50 Leder, D. Lithic variability and techno-economy of the Initial Upper Palaeolithic in the  
193 Levant. *International Journal of Archaeology* **6**, 23-36 (2018).

- 194 51 Williams, J. & Bergman, C. The 1937–1938 and 1947–1948 Excavations of Levels  
195 XIII-VI at Ksar Akil, Lebanon. *Paléorient* **36**, 117-161 (2010).
- 196 52 Garrod, D. A. The Mugharet el-Emireh in Lower Galilee: type-station of the Emiran  
197 industry. *The Journal of the Royal Anthropological Institute of Great Britain and*  
198 *Ireland* **85**, 141-162 (1955).
- 199 53 Barzilai, O. & Gubenko, N. Rethinking Emireh Cave: the lithic technology perspectives.  
200 *Quaternary International* **464**, 92-105 (2018).
- 201 54 Garrod, D. A. A transitional industry from the base of the Upper Palaeolithic in Palestine  
202 and Syria. *Journal of the Anthropological Institute of Great Britain and Ireland*, 121-  
203 130 (1951).
- 204 55 Sarel, J. The middle-upper Paleolithic transition in Israel. *BAR International Series*  
205 **1229** (2004).
- 206 56 Marks, A. E. Reflections on Levantine Upper Palaeolithic studies: past and present.  
207 *More than meets the eye: Studies on Upper Palaeolithic diversity in the Near East*, 249-  
208 264 (2003).
- 209 57 Shunkov, M. V., Fedorchenko, A. Y., Kozlikin, M. B. & Derevianko, A. P. Initial Upper  
210 Palaeolithic ornaments and formal bone tools from the East Chamber of Denisova Cave  
211 in the Russian Altai. *Quaternary International* (2020).
- 212 58 Goebel, T., Derevianko, A. P. & Petrin, V. T. Dating the middle-to-upper-paleolithic  
213 transition at Kara-Bom. *Current anthropology* **34**, 452-458 (1993).
- 214 59 Slavinskiy, V. Industrii Ranneverhinepaleoliticheskii Ourovney Ovitanya Ctoyanki  
215 Ust-Karakol 1 (Early Upper Paleolithic Industry from the occupation levels at Ust-  
216 Karakol 1). *Severnaya Evrasia v Anthropologenie. ChelovekPaleolitechnologii,*  
217 *Geoecologia, Ethnografii i Anthropologii*, 197-214 (2007).
- 218 60 Derevianko, A. P. *et al.* Paleolithic of the Altai, Richard Liu Foundation. *European*  
219 *Institute of Chinese Studies Occasional Papers* **1** (2001).
- 220 61 Goebel, T. & Aksenov, M. Accelerator radiocarbon dating of the initial Upper  
221 Palaeolithic in southeast Siberia. *Antiquity* **69**, 349-357 (1995).
- 222 62 Orlova, L., Kuzmin, Y. & Lbova, L. Radiocarbon Dates of the Paleolithic and  
223 Mesolithic Sites in Transbaikal and Mongolia. *The Paleolithic Cultures of Transbaikal*  
224 *and Mongolia: New Facts, Methods, and Hypotheses*, 88-92 (2005).
- 225 63 Lbova, L. Chronology and paleoecology of the Early Upper Paleolithic in the  
226 Transbaikal region (Siberia). *Eurasian Prehistory* **5** (2008).

- 227 64 Kuzmin, Y. V., Lbova, L. V., Jull, A. T. & Cruz, R. J. The Middle-to-Upper-Paleolithic  
228 transition in Transbaikal, Siberia: the Khotykh site chronology and archaeology. *Current*  
229 *Research in the Pleistocene* **23** (2006).
- 230 65 Tashak, V. in *Arkheologiya I Kulturnaya Antropologiya Dalnego Vostoka I Tsentralnoi*  
231 *Azii. Vladivostok* 25-33 (2002).
- 232 66 Antonova, Y. E. & Tashak, V. Stone Industry of Podzvonkaya South-East Complex:  
233 General Characterization. *The bulletin of Irkutsk State University. «Geoarchaeology,*  
234 *Ethnology, and Anthropology Series»*, 3-20 (2016).
- 235 67 Derevianko, A. *et al.* Early upper paleolithic stone tool technologies of northern  
236 Mongolia: the case of Tolbor-4 and Tolbor-15. *Archaeology, Ethnology and*  
237 *Anthropology of Eurasia* **41**, 21-37 (2013).
- 238 68 Zwyns, N. *Laminar technology and the onset of the Upper Paleolithic in the Altai,*  
239 *Siberia.* (Leiden University Press Leiden, 2012).
- 240 69 Zwyns, N. *et al.* The open-air site of Tolbor 16 (Northern Mongolia): Preliminary results  
241 and perspectives. *Quaternary International* **347**, 53-65 (2014).
- 242 70 Derevianko, A., Brantingham, P. J., Olsen, J. W. & Tseveendorj, D. in *The Early Upper*  
243 *Paleolithic Beyond Western Europe* 207-222 (University of California Press, 2004).
- 244 71 Li, F., Kuhn, S. L., Gao, X. & Chen, F.-y. Re-examination of the dates of large blade  
245 technology in China: A comparison of Shuidonggou Locality 1 and Locality 2. *Journal*  
246 *of Human Evolution* **64**, 161-168 (2013).



247 **Table S1.1 Modern human specimens older than ~30,000 years cal. BP from which**  
 248 **genome-wide data has been generated and their respective radiocarbon dates.**  
 249 Archaeological sites from which these specimens originate are plotted in Fig. 1. Radiocarbon  
 250 dates calibrated with IntCal20<sup>7</sup> and OxCal 4.4.2<sup>6</sup>.

| Specimen            | Radiocarbon date ID         | Raw radiocarbon date BP   | Date type and publication | Calibrated date with IntCal20 <sup>6</sup> and OxCal 4.4.2, cal. BP 95.4% | Mean date, cal. BP, IntCal20 <sup>6</sup> and OxCal 4.4.2 |
|---------------------|-----------------------------|---------------------------|---------------------------|---------------------------------------------------------------------------|-----------------------------------------------------------|
| Bacho Kiro CC7-335  | ETH-86772                   | 42,450±510                | Direct-UF <sup>3,4</sup>  | 45,930-44,420                                                             | 45,120                                                    |
| Bacho Kiro BB7-240  | ETH-86770                   | 41,850±480                | Direct-UF <sup>3,4</sup>  | 45,550-43,940                                                             | 44,690                                                    |
| Ust'Ishim           | OxA-25516 & 30190           | 41,400±950                | Direct-UF <sup>15</sup>   | 45,930-42,900                                                             | 44,360                                                    |
| Bacho Kiro CC7-2289 | ETH-86771                   | 40,600±420                | Direct-UF <sup>3,4</sup>  | 44,400-42,990                                                             | 43,690                                                    |
| Bacho Kiro AA7-738  | ETH-86769                   | 39,750±380                | Direct-UF <sup>3,4</sup>  | 43,930-42,580                                                             | 43,110                                                    |
| Oase1               | GrA-22810 and OxA-11711     | 34,950±900                | Direct-UF <sup>14</sup>   | 41,860-37,950                                                             | 40,020                                                    |
| Tianyuan            | BA-03222                    | 34,430±510                | ? <sup>27</sup>           | 40,850-38,070                                                             | 39,570                                                    |
| Kostenki14          | OxA-X-2395-15               | 33,250±500                | HYP <sup>28</sup>         | 39,380-36,670                                                             | 38,050                                                    |
| Bacho Kiro F6-597   | ETH-86773, AIX-12025        | 31,660±140                | Direct-UF <sup>3,4</sup>  | 36,320-35,600                                                             | 36,000                                                    |
| Goyet Q116-1        | GrA-46175                   | 30,880±170                | Direct-noUF <sup>29</sup> | 35,630-34,720                                                             | 35,210                                                    |
| Bacho Kiro BK-1653  | ETH-86768, AIX-12024        | 30,570±120                | Direct-UF <sup>3,4</sup>  | 35,290-34,610                                                             | 34,950                                                    |
| Sunguir 2           | OxA-X-2395-6                | 30,100±550                | Direct-HYP <sup>25</sup>  | 35,790-33,430                                                             | 34,610                                                    |
| Sunguir 3           | OxA-X-2395-7                | 30,000±550                | Direct-HYP <sup>25</sup>  | 35,640-33,270                                                             | 34,520                                                    |
| Sunguir 4           | OxA-X-2462-52               | 29,820±280                | Direct-HYP <sup>25</sup>  | 34,850-33,720                                                             | 34,320                                                    |
| Muierii2            | OxA-16252                   | 29,110±190                | Direct-UF <sup>30</sup>   | 34,180-33,140                                                             | 33,660                                                    |
| Sunguir 1           | OxA-X-2464-12               | 28,890±430                | Direct-HYP <sup>25</sup>  | 34,280-32,020                                                             | 33,270                                                    |
| Cioclovina1         | OxA-15527                   | 28,510±170                | Direct-UF <sup>31</sup>   | 33,300-32,010                                                             | 32,660                                                    |
| Kostenki12          | GrA-5552                    | 28,500±140                | layer date <sup>32</sup>  | 33,210-32,070                                                             | 32,650                                                    |
| Paglicci133         | UTC-1789 and UTC-1415       | 28,100±400 and 29,300±600 | layer date <sup>33</sup>  | 33,370-31,230                                                             | 32,260                                                    |
| Yana RHS            | Beta-271412 and Beta-230442 | 27,940±115                | layer date <sup>26</sup>  | 32,190-31,530                                                             | 31,870                                                    |
| Vestonice16         | Aix12030                    | 27,220±110                | Direct-UF <sup>34</sup>   | 31,530-31,080                                                             | 31,250                                                    |
| Vestonice43         | Aix12032                    | 27,070±110                | Direct-UF <sup>34</sup>   | 31,280-31,030                                                             | 31,150                                                    |
| Vestonice13         | Aix12027                    | 27,040±100                | Direct-UF <sup>34</sup>   | 31,240-31,030                                                             | 31,140                                                    |
| KremsWA3            | VERA-3941                   | 26,870±220                | layer date <sup>35</sup>  | 31,360-30,430                                                             | 31,020                                                    |
| Vestonice14         | Aix12028                    | 26,760±100                | Direct-UF <sup>34</sup>   | 31,150-30,860                                                             | 31,010                                                    |
| Vestonice15         | Aix12029                    | 26,680±70                 | Direct-UF <sup>34</sup>   | 31,110-30,840                                                             | 30,980                                                    |
| Pavlov1             | Aix12026                    | 25,490±90                 | Direct-UF <sup>34</sup>   | 30,050-29,320                                                             | 29,800                                                    |

251

252 **Table S1.2 Archaeological sites with layers containing Initial Upper Palaeolithic (IUP)**  
 253 **assemblage.** These sites are plotted in Fig. 1, demonstrating distribution of IUP archaeological  
 254 sites in Eurasia, and modified after Kuhn and Zwyns<sup>18</sup>.

| Number on the map in Fig. 1 | Archaeological site with IUP | Country        | Reference |
|-----------------------------|------------------------------|----------------|-----------|
| 19                          | Brno-Bohunice                | Czech Republic | 36,37     |
| 20                          | Stránská Skála III           | Czech Republic | 36,38     |
| 19                          | Bohunice-Kejbaly I, II       | Czech Republic | 36        |
| 21                          | Temnata                      | Bulgaria       | 39        |
| 1                           | Bacho Kiro Cave              | Bulgaria       | 3,4       |
| 22                          | Kulychivka                   | Ukraine        | 40,41     |
| 23                          | Korolevo 1, 2                | Ukraine        | 42,43     |
| 24                          | Shlyakh                      | Russia         | 44        |
| 25                          | Üçagizli Cave                | Turkey         | 19,45     |
| 26                          | Kanal Cave                   | Turkey         | 46        |
| 27                          | Um el'Tlel                   | Syria          | 47        |
| 28                          | Jerf Ajlah                   | Syria          | 48        |
| 29                          | Yabrud II                    | Syria          | 49        |
| 30                          | Antelias                     | Lebanon        | 50        |
| 31                          | Abou Halka                   | Lebanon        | 50        |
| 32                          | Ksar Akil rockshelter        | Lebanon        | 51        |
| 33                          | Emireh Cave                  | Israel         | 52,53     |
| 34                          | El Wad                       | Israel         | 54        |
| 35                          | Raqefet                      | Israel         | 55        |
| 36                          | Boker Tachtit                | Israel         | 56        |
| 37                          | Denisova Cave                | Russia         | 57        |
| 38                          | Kara-Bom                     | Russia         | 58        |
| 39                          | Ust-Karakol 1                | Russia         | 59        |
| 40                          | Kara-Tenesh                  | Russia         | 60        |
| 41                          | Makarvo IV                   | Russia         | 61        |
| 42                          | Kamenka A-C                  | Russia         | 62,63     |
| 43                          | Khotyk                       | Russia         | 63,64     |
| 44                          | Podzvonkaya                  | Russia         | 65,66     |
| 45                          | Tolbor 4                     | Mongolia       | 67,68     |
| 46                          | Tolbor 16                    | Mongolia       | 69        |
| 47                          | Tsagan-Agui                  | Mongolia       | 70        |
| 48                          | Suindonggou 1                | China          | 71        |
| 49,50                       | Suindonggou 2, 9             | China          | 71        |

255

## 256 **Supplementary Information 2**

257

### 258 **Ancient DNA processing, quality controls and contamination estimates**

259

#### 260 **DNA extraction and library preparation**

261 Data generation for the seven Bacho Kiro Cave specimens (specimen IDs: *F6-620*, *AA7-738*,  
262 *BB7-240*, *CC7-2289*, *CC7-335*, *F6-597* and *BK1653*) was based on DNA libraries prepared  
263 previously and detailed in Online Materials and Methods of *Hublin et al.*<sup>1</sup>. In short, five single-  
264 stranded DNA libraries<sup>2</sup> were prepared for each specimen on an automated liquid handling  
265 platform (Bravo NGS workstation B, Agilent Technologies)<sup>3</sup> by using ten  $\mu\text{L}$  of DNA extract  
266 as input, tagged with two unique index sequences<sup>4,5</sup> and amplified into plateau using AccuPrime  
267 Pfx DNA polymerase (Life Technologies)<sup>6</sup>. This amounted to a total of 35 libraries for Bacho  
268 Kiro Cave specimens (Tab. S2.1).

269 In order to generate additional data from *Oase1*, we extracted DNA from 15 mg of bone  
270 powder of the *Oase1* mandible<sup>7,8</sup>. Since the specimen was previously found to be highly  
271 contaminated with microbial and present-day human DNA, the bone powder was treated with  
272 0.5% hypochlorite solution prior to DNA extraction<sup>4</sup>. Four single-stranded DNA libraries were  
273 prepared from the resulting extract in the same way as described above. Two additional libraries  
274 were prepared, each using 5  $\mu\text{L}$  of the two DNA extracts generated previously<sup>8</sup> (E1406 and  
275 E1843) (Tab. S2.1).

276 All Bacho Kiro Cave and *Oase1* libraries were made omitting UDG treatment to  
277 maximize the recovery of endogenous DNA and to preserve deamination signals. Fifty  $\mu\text{L}$  of  
278 each of the amplified libraries were purified on an automated liquid handling platform using  
279 SPRI beads<sup>3</sup>, and their concentration was determined on a NanoDrop 1000 Spectrophotometer  
280 (NanoDrop Technologies). To assess nuclear DNA preservation, the purified libraries were  
281 pooled together with libraries from other experiments and one-cycle PCR reaction with  
282 Herculase II Fusion DNA polymerase (Agilent Technologies)<sup>7</sup> and IS5 and IS6 primers<sup>2,9</sup> was  
283 used to remove heteroduplex formations. The pools of libraries were then sequenced directly  
284 on Illumina MiSeq or HiSeq 2500 platforms in a double index configuration (2x76 cycles)<sup>5</sup> and  
285 base calling was done using Bustard (Illumina).

## 286 **Sequencing and alignment to the nuclear genome**

287 For all sequencing runs we trimmed the adapters and merged overlapping forward and reverse  
288 reads into single sequences using *leeHom*<sup>10</sup> (version: <https://bioinf.eva.mpg.de/leehom/>). The  
289 Burrows-Wheeler Aligner (BWA, version: 0.5.10-evan.9-1-g44db244;  
290 <https://github.com/mpieva/network-aware-bwa>) with the parameters adjusted for ancient DNA  
291 (“-n 0.01 -o 2 -l 16500”)<sup>11</sup> was used to align the data from all sequencing runs to the human  
292 reference genome (GRCh37/1000 Genomes release;  
293 [ftp://ftp.1000genomes.ebi.ac.uk/vol1/ftp/technical/reference/phase2\\_reference\\_assembly\\_seq  
294 uence/](ftp://ftp.1000genomes.ebi.ac.uk/vol1/ftp/technical/reference/phase2_reference_assembly_sequence/)). Only reads that showed perfect matches to the expected index combinations were used  
295 for all downstream analyses. PCR duplicates were removed using *bam-rmdup* (version: 0.6.3;  
296 <https://github.com/mpieva/biohazard-tools>) and *SAMtools* (version: 1.3.1)<sup>12</sup> were used to filter  
297 for fragments that were at least 35 bp long and that had a mapping quality equal or greater than  
298 25.

299

## 300 **Mitochondrial DNA capture and sequencing**

301 Mitochondrial DNA (mtDNA) captures of Bacho Kiro Cave libraries and their processing are  
302 detailed in *Hublin et al.*<sup>1</sup>. An aliquot of each newly generated *Oase1* library was also enriched  
303 for human mtDNA using a bead-based hybridization method<sup>13</sup>. Enriched libraries were pooled  
304 with libraries from other experiments and sequenced on an Illumina MiSeq platform in a double  
305 index configuration (2x76 cycles)<sup>5</sup>. Trimming of the adapters, merging of forward and reverse  
306 reads and the alignment parameters were the same as for the nuclear DNA data detailed above,  
307 with the difference of using the revised Cambridge Reference Sequence (NC\_01290) for the  
308 alignment of the mtDNA data. The reads with perfect matches to the expected index  
309 combinations were retained for downstream analyses and PCR duplicates were removed using  
310 *bam-rmdup* (version: 0.6.3; <https://github.com/mpieva/biohazard-tools>). We used *SAMtools*  
311 (version: 1.3.1)<sup>12</sup> to merge libraries originating from the same extract, and filter for fragments  
312 of at least 35 bp with a mapping quality of 25 or greater.

313

## 314 **In solution hybridization capture of nuclear DNA**

315 We estimated the genomic coverage in each library that could be obtained by sequencing a  
316 library to exhaustion (“nuclear DNA content”) by using the number of library molecules  
317 determined by quantitative PCR (qPCR) and the fraction of sequences of at least 35 base pairs  
318 (bp) that could be mapped to the human reference genome (Tab. S2.1)<sup>9</sup>. We selected the  
319 libraries with estimated genomic coverage of at least 1% after restricting the analyses to the

320 fragments showing cytosine (C) to thymine (T) substitutions at the first three and/or the last  
321 three positions of the alignment ends for further in solution hybridization captures to  
322 oligonucleotide probes<sup>13</sup>.

323           Given the low nuclear DNA content in the Bacho Kiro Cave *F6-597* specimen (Tab.  
324 S2.1), the absence of C-to-T substitutions after restricting the analyses to sequences carrying a  
325 C-to-T substitution at the opposing end<sup>14</sup> (“conditional” substitutions, Tab. S2.2 and Extended  
326 Data Fig. 1) and high levels of present-day human DNA contamination as determined based on  
327 mitochondrial DNA analyses<sup>1</sup>, we did not attempt in solution hybridization capture for this  
328 specimen.

329           We enriched the selected amplified libraries for ~3.7 million single nucleotide  
330 polymorphisms (SNPs) across the genome detailed in the Supplementary Data 2 of *Haak et*  
331 *al.*<sup>15</sup> (SNP Panel 1 or “390k” array), and Supplementary Data 1, 2 and 3 of *Fu et al.*<sup>8</sup> (SNP  
332 Panels 2, 3 and 4, or “840k”, “1000k” and “Archaic admixture” arrays, respectively). For the  
333 identified male individuals (*F6-620*, *BB7-240* and *CC7-335*; see Supplementary Information  
334 4), an aliquot of each library was additionally enriched for ~6.9 Mb of the Y chromosome<sup>16</sup>.  
335 All of the enriched libraries were sequenced on the Illumina HiSeq 2500 platforms in a double  
336 index configuration (2x76 cycles)<sup>5</sup> and base calling was done using Bustard (Illumina).

337

### 338 **Processing of nuclear DNA capture data**

339 In addition to the steps described in the “Sequencing and alignment to the nuclear genome”  
340 section above, BAM files of the libraries enriched for the specific subset of the nuclear genome  
341 were intersected with the BED files containing target SNP positions (“390k”, “840k”, “1000k”,  
342 “Archaic admixture”, a merged set of SNP Panels 1 and 2 or “1240k”, and a merged set of SNP  
343 Panels 1, 2 and 3 or “2200k”) and regions (Y chromosome) using *BEDtools*<sup>17</sup> (version: 2.24.0).  
344 In order to filter for endogenous ancient DNA or putatively deaminated fragments, we used  
345 elevated C-to-T substitutions relative to the reference genome at the first three and/or last three  
346 positions of the alignment ends<sup>14</sup>. We merged the libraries originating from the same specimen  
347 using *samtools merge*<sup>12</sup> to produce the final datasets for downstream analyses. Tables S2.3-  
348 S2.8 summarize the number of filter-passed fragments and SNPs covered per specimen for each  
349 library as well as for the merged data of all libraries stemming from the same specimen  
350 depending on the SNP Panel used. Extended Data Tab. 1 summarizes the number of filter-  
351 passed fragments and SNPs covered in the final merged dataset used for downstream analyses.

352 **Ancient DNA substitution patterns**

353 For each specimen we analysed substitution patterns along the fragments for all libraries  
354 separately (Tab. S2.2) and for the merged data of all libraries originating from the same  
355 specimen (Extended Data Fig. 1) by counting the number of substitutions relative to the human  
356 reference genome. As deamination of cytosine (C) to uracil (U) residues results in characteristic  
357 C-to-T substitutions in ancient DNA molecules<sup>18</sup>, elevated C-to-T substitutions close to the  
358 alignment ends provide evidence for the presence of authentic ancient DNA in specimens<sup>19,20</sup>.  
359 The C-to-T substitution frequencies ranged between 23.11% and 55.78% on the 5'-ends, and  
360 between 15.13% and 43.02% on the 3'-ends of the enriched libraries (Extended Data Fig. 1).  
361 These frequencies increased substantially when filtering for sequences with a C-to-T at the  
362 opposing end (“conditional” substitutions)<sup>14</sup> for the Bacho Kiro Cave specimens AA7-738 and  
363 CC7-2289 and *Oase1*, indicating that both endogenous ancient DNA as well some present-day  
364 human DNA contamination are present<sup>14</sup>. For the other specimens these frequencies remained  
365 stable, indicating that the majority of the data stems from one population of sequences.

366

367 **Random read sampling and consensus calling**

368 We performed random read sampling using *bam-caller* (<https://github.com/bodkan/bam-caller>,  
369 version: 0.1) by picking a base with a base quality of at least 30 at each position in the “1240k”  
370 and “2200k” SNP Panels (Supplementary Information 2) that was covered by at least one  
371 fragment longer than 35 bp with a mapping quality equal or higher than 25 ( $L \geq 35$ bp,  $MQ \geq 25$ ,  
372  $BQ \geq 30$ ). To mitigate the effect of deamination-derived substitutions on downstream analyses,  
373 we did not sample any Ts on the forward strands (in the orientation as sequenced) and any As  
374 on the reverse strands in the first three and/or last three positions from the alignment ends.  
375 Furthermore, we repeated each of the analyses using only transversion polymorphisms to make  
376 sure our inferences are robust to any aDNA damage.

377 Due to the haploid nature of the Y chromosome, we called genotypes across the ~6.9  
378 Mb of the Y chromosome for the enriched libraries of male individuals by calling a consensus  
379 allele at each position by majority call requiring a minimum coverage of 3 for the specimens  
380 *F6-620* and *BB7-240* and of 2 for the specimen *CC7-335* using using *bam-caller*  
381 (<https://github.com/bodkan/bam-caller>, version: 0.1). Random allele calls of Bacho Kiro Cave  
382 individuals and *Oase1* for different SNP Panels and consensus calls for Y chromosome regions,  
383 both for all and putatively deaminated fragments are available in EIGENSTRAT format at  
384 [http://cdna.eva.mpg.de/modern\\_human/BachoKiro/](http://cdna.eva.mpg.de/modern_human/BachoKiro/).

385 **Contamination estimates**

386 In addition of all analysed libraries needing to have a damage profile consistent with aDNA  
387 (Extended Data Fig. 1), we used four complementary approaches in estimating the proportion  
388 of present-day human DNA contamination in the generated data of Bacho Kiro Cave specimens  
389 and *Oase1*. The estimates of present-day human DNA contamination are summarized in the  
390 Table S2.10.

391

392 Mitochondrial DNA contamination estimates.

393 We analysed mitochondrial DNA (mtDNA) data from Bacho Kiro Cave specimens in a  
394 previous study<sup>1</sup> and estimated the proportion of present-day human DNA contamination to  
395 range between 0.2% to 2.9% among all fragments of specimens *F6-620*, *AA7-738*, *CC7-2289*,  
396 *CC7-335* and *BK1653*, and between 0% and 1.6% among putatively deaminated fragments,  
397 respectively. We estimated the proportion of present-day human DNA contamination among  
398 all fragments of the specimen *F6-597* to be 63.5% (95% confidence intervals (CI): 62.5-  
399 64.5%)<sup>2</sup> using *schmutzi*<sup>21</sup> (version: 1.5.5). Given the high contamination estimates<sup>1</sup> and low  
400 nuclear DNA content (<1% among putatively deaminated fragments (Tab. S2.1)), we excluded  
401 the libraries of the specimen *F6-597* from nuclear captures and downstream analyses.

402 We estimated proportion of present-day human DNA contamination in the newly  
403 generated *Oase1* libraries using six previously identified positions<sup>8</sup> where *Oase1* mtDNA  
404 genome differs from 99% of a world-wide panel of 311 present-day human mtDNAs<sup>22</sup>. We  
405 counted the number of recovered mtDNA fragments that cover these positions, while taking  
406 into account the strand orientation in cases where one of the diagnostic positions was a C or a  
407 G<sup>14</sup>. The proportion of present-day human DNA contamination among all fragments in the  
408 libraries prepared from two previously generated extracts<sup>8</sup> are 64.29% (95% CI: 58.36%-  
409 69.80%) and 71.96% (95% CI: 66.59%-76.77%), respectively, and 46.22% (95% CI: 40.50%-  
410 52.39%) in the libraries prepared from a new extract, indicating that the hypochlorite treatment  
411 did not substantially reduce the amount of present-day human DNA contamination. The  
412 proportion of present-day human DNA contamination among putatively deaminated fragments  
413 is 8.70% (95% CI: 2.42%-14.98%) and 9.38% (95% CI: 3.24%-15.52%) for the new libraries  
414 prepared from the two previously generated extracts<sup>8</sup> and 4.51% (95% CI: 0%-9.34%) for the  
415 libraries prepared from the new extract.

416 Contamination estimates based on the X chromosome polymorphisms in males.

417 We used ANGSD<sup>23,24</sup> (version: 0.929) to estimate contamination in male individuals where we  
418 have sufficient X coverage, i.e. at least 200 SNPs covered by at least two fragments<sup>25</sup>. Since  
419 males have only one copy of X chromosome, we do not expect polymorphisms in this part of  
420 their genome. For the *F6-620*, *BB7-240* and *CC7-335* contamination estimates inferred by  
421 ANGSD are 1.62% (standard error (SE): 0.12), 2.75% (SE: 0.37) and 3.41% (SE: 0.53) among  
422 all fragments, and 1.09% (SE: 0.40), 1.27% (SE: 1.03) and 2.13% (SE: 0.94) among deaminated  
423 fragments, respectively.

424

425 Contamination estimates based on the ancient DNA damage.

426 We used AuthentiCT<sup>26</sup> (version: 1.0.0), an approach that utilizes patterns of aDNA damage, to  
427 estimate the proportion of present-day human DNA contamination among nuclear sequences  
428 of the enriched libraries. Among the sequences overlapping “2200k” SNP Panel, the inferred  
429 proportion of present-day human DNA contamination ranges between 2.23% (standard error  
430 (SE): 0.54%, *F6-620*) and 42.36% (SE: 0.64%, *CC7-2289*) (Tab. S2.10).

431

432 Consistency of results from all fragments and deaminated fragments.

433 To test for evidence of contamination, we computed D-statistics using ADMIXTOOLS<sup>27</sup>  
434 (version: v5.1) as implemented in the R-package *admixr*<sup>28</sup> (version: 0.7.1) on SNPs from  
435 nuclear capture Panels 1, 2 and 3 (“2200k”) covered by both all and putatively deaminated  
436 fragments<sup>8,25</sup> for specimens *F6-620*, *BB7-240*, *CC7-335* and *BK1653*. The number of  
437 overlapping informative sites between all and deaminated fragments for specimens *AA7-738*  
438 and *CC7-2289* is too low to confidently perform this test. We computed  $D(BK\ specimen_1\ all,$   
439  $BK\ specimen_1\ deaminated; Test, Mbuti)$  where *Test* is a present-day human population from  
440 Simons Genome Diversity Project (SGDP)<sup>29</sup> and three Mbuti individuals from SGDP are used  
441 as outgroup. We used a Weighted Block Jackknife<sup>27,30</sup> and a block size of 5 million base pairs  
442 (5 Mb) across all autosomes on the “2200k” SNP Panel to calculate these statistics.

443 Figures S2.1 ad S2.2 show there is no significant difference between using all fragments  
444 and restricting the analyses to deaminated fragments for *F6-620*, *BB7-240*, *CC7-335* and  
445 *BK1653* (all  $|Z| < 3$ ). However, given the higher contamination estimates among all fragments  
446 of *BB7-240*, *CC7-335*, *CC7-2289* and *AA7-738* using AuthentiCT<sup>26</sup> (version: 1.0.0) (Tab.  
447 S2.10), we restricted all downstream analyses to deaminated fragments for these specimens,  
448 unless otherwise stated.



449 **References SI2:**

- 450 1 Hublin, J.-J. et al. Initial Upper Palaeolithic Homo sapiens from Bacho Kiro Cave,  
451 Bulgaria. *Nature* **581**, 299-302, doi:10.1038/s41586-020-2259-z (2020).
- 452 2 Gansauge, M. T. et al. Single-stranded DNA library preparation from highly degraded  
453 DNA using T4 DNA ligase. *Nucleic Acids Res.* **45**, e79, doi:10.1093/nar/gkx033 (2017).
- 454 3 Slon, V. et al. Neandertal and Denisovan DNA from Pleistocene sediments. *Science*  
455 **356**, 605-608, doi: 10.1126/science.aam9695 (2017).
- 456 4 Korlević, P. et al. Reducing microbial and human contamination in DNA extractions  
457 from ancient bones and teeth. *Biotechniques* **59**, 87-93, doi:10.2144/000114320 (2015).
- 458 5 Kircher, M., Sawyer, S. & Meyer, M. Double indexing overcomes inaccuracies in  
459 multiplex sequencing on the Illumina platform. *Nucleic Acids Res.* **40**, e3,  
460 doi:10.1093/nar/gkr771 (2012).
- 461 6 Dabney, J. & Meyer, M. Length and GC-biases during sequencing library amplification:  
462 a comparison of various polymerase-buffer systems with ancient and modern DNA  
463 sequencing libraries. *Biotechniques* **52**, 87-94, doi:10.2144/000113809 (2012).
- 464 7 Trinkaus, E. et al. An early modern human from the Peștera cu Oase, Romania. *Proc.*  
465 *Natl. Acad. Sci. U.S.A.* **100**, 11231-11236, doi: 10.1073/pnas.2035108100 (2003).
- 466 8 Fu, Q. et al. An early modern human from Romania with a recent Neanderthal ancestor.  
467 *Nature* **524**, 216-219, doi:10.1038/nature14558 (2015).
- 468 9 Glocke, I. & Meyer, M. Extending the spectrum of DNA sequences retrieved from  
469 ancient bones and teeth. *Genome Res.* **27**, 1230-1237, doi: 10.1101/gr.219675.116  
470 (2017).
- 471 10 Renaud, G., Stenzel, U. & Kelso, J. leeHom: adaptor trimming and merging for Illumina  
472 sequencing reads. *Nucleic Acids Res.* **42**, e141, doi:10.1093/nar/gku699 (2014).
- 473 11 Meyer, M. et al. A high-coverage genome sequence from an archaic Denisovan  
474 individual. *Science* **338**, 222-226, doi:10.1126/science.1224344 (2012).
- 475 12 Li, H. et al. The Sequence Alignment/Map format and SAMtools. *Bioinformatics* **25**,  
476 2078-2079, doi:10.1093/bioinformatics/btp352 (2009).
- 477 13 Fu, Q. et al. DNA analysis of an early modern human from Tianyuan Cave, China. *Proc.*  
478 *Natl. Acad. Sci. U.S.A.* **110**, 2223-2227, doi:10.1073/pnas.1221359110 (2013).
- 479 14 Meyer, M. et al. A mitochondrial genome sequence of a hominin from Sima de los  
480 Huesos. *Nature* **505**, 403-406, doi:10.1038/nature12788 (2014).
- 481 15 Haak, W. et al. Massive migration from the steppe was a source for Indo-European  
482 languages in Europe. *Nature* **522**, 207-211, doi:10.1038/nature14317 (2015).

- 483 16 Petr, M. *et al.* The evolutionary history of Neanderthal and Denisovan Y chromosomes.  
484 *Science* **369**, 1653-1656, doi: 10.1126/science.abb6460 (2020).
- 485 17 Quinlan, A. R. & Hall, I. M. BEDTools: a flexible suite of utilities for comparing  
486 genomic features. *Bioinformatics* **26**, 841-842, doi: 10.1093/bioinformatics/btq033  
487 (2010).
- 488 18 Briggs, A. W. *et al.* Patterns of damage in genomic DNA sequences from a Neandertal.  
489 *Proc. Natl. Acad. Sci. U.S.A.* **104**, 14616-14621, doi:10.1073/pnas.0704665104 (2007).
- 490 19 Krause, J. *et al.* A complete mtDNA genome of an early modern human from Kostenki,  
491 Russia. *Curr. Biol.* **20**, 231-236, doi:10.1016/j.cub.2009.11.068 (2010).
- 492 20 Sawyer, S., Krause, J., Guschanski, K., Savolainen, V. & Paabo, S. Temporal patterns  
493 of nucleotide misincorporations and DNA fragmentation in ancient DNA. *PLoS One* **7**,  
494 e34131, doi:10.1371/journal.pone.0034131 (2012).
- 495 21 Renaud, G., Slon, V., Duggan, A. T. & Kelso, J. Schmutzi: estimation of contamination  
496 and endogenous mitochondrial consensus calling for ancient DNA. *Genome Biol.* **16**,  
497 224, doi:10.1186/s13059-015-0776-0 (2015).
- 498 22 Green, R. E. *et al.* A complete Neandertal mitochondrial genome sequence determined  
499 by high-throughput sequencing. *Cell* **134**, 416-426, doi:10.1016/j.cell.2008.06.021  
500 (2008).
- 501 23 Korneliussen, T. S., Albrechtsen, A. & Nielsen, R. ANGSD: analysis of next generation  
502 sequencing data. *BMC bioinformatics* **15**, 356 (2014).
- 503 24 Rasmussen, M. *et al.* An Aboriginal Australian genome reveals separate human  
504 dispersals into Asia. *Science* **334**, 94-98 (2011).
- 505 25 Fu, Q. *et al.* The genetic history of Ice Age Europe. *Nature* **534**, 200-205,  
506 doi:10.1038/nature17993 (2016).
- 507 26 Peyrègne, S. & Peter, B. M. AuthentiCT: a model of ancient DNA damage to estimate  
508 the proportion of present-day DNA contamination. *Genome Biol.* **21**, 246, doi:  
509 10.1186/s13059-020-02123-y (2020).
- 510 27 Patterson, N. *et al.* Ancient admixture in human history. *Genetics* **192**, 1065-1093,  
511 doi:10.1534/genetics.112.145037 (2012).
- 512 28 Petr, M., Vernot, B. & Kelso, J. admixr—R package for reproducible analyses using  
513 ADMIXTOOLS. *Bioinformatics* **35**, 3194-3195 (2019).
- 514 29 Mallick, S. *et al.* The Simons Genome Diversity Project: 300 genomes from 142 diverse  
515 populations. *Nature* **538**, 201-206, doi:10.1038/nature18964 (2016).

516 30 Busing, F. M. T. A., Meijer, E. & Van Der Leeden, R. Delete-m jackknife for unequal  
517 m. *Statistics and Computing* **9**, 3-8, doi: 10.1023/A:1008800423698 (1999).

518 Table S2.1 The characteristics of Bacho Kiro Cave and *Oase1* ssDNA libraries and summary statistics of the shotgun data.

| Specimen            | Specimen ID | Amount of powder used for DNA extraction (mg) | Extract ID         | Volume of extract used for library preparation (µL) | Library ID | Total number of DNA molecules in the library* | Number of spike-in molecules in the library* | Number of sequenced fragments | Number of fragments ≥35 bp | Number of mapped fragments ≥35bp, MQ≥25 | Number of unique fragments ≥35bp, MQ≥25 | % mapped fragments ≥35bp, MQ≥25 | Average fragment length | Estimated coverage in the library (all fragments) | Number of deaminated fragments ≥35bp, MQ≥25 | Average deaminated fragment length | Estimated coverage in the library (deaminated fragments) |
|---------------------|-------------|-----------------------------------------------|--------------------|-----------------------------------------------------|------------|-----------------------------------------------|----------------------------------------------|-------------------------------|----------------------------|-----------------------------------------|-----------------------------------------|---------------------------------|-------------------------|---------------------------------------------------|---------------------------------------------|------------------------------------|----------------------------------------------------------|
| Bacho Kiro F6-620   | SP6931      | 29.3                                          | E9293              | 10                                                  | A11197     | 3.18E+10                                      | 1.11E+06                                     | 2,403,103                     | 1,438,335                  | 19,650                                  | 19,571                                  | <b>1.366</b>                    | 58.50                   | <b>6.31</b>                                       | 4,929                                       | 56.20                              | <b>6.11</b>                                              |
|                     |             |                                               |                    | 10                                                  | A12357     | 2.05E+10                                      | 1.42E+06                                     | 581,401                       | 342,184                    | 4,384                                   | 4,383                                   | <b>1.281</b>                    | 59.00                   | <b>3.72</b>                                       | 1,047                                       | 57.20                              | <b>3.52</b>                                              |
|                     |             |                                               |                    | 10                                                  | A12550     | 1.48E+10                                      | 8.29E+05                                     | 2,927,791                     | 1,728,732                  | 23,601                                  | 23,529                                  | <b>1.365</b>                    | 59.20                   | <b>2.91</b>                                       | 5,702                                       | 57.20                              | <b>2.74</b>                                              |
|                     |             |                                               |                    | 10                                                  | A12944     | 1.74E+10                                      | 9.93E+05                                     | 2,750,462                     | 1,695,480                  | 19,411                                  | 19,336                                  | <b>1.145</b>                    | 59.30                   | <b>3.01</b>                                       | 4,715                                       | 57.80                              | <b>2.88</b>                                              |
|                     |             |                                               |                    | 10                                                  | A15716     | 2.86E+10                                      | 1.44E+06                                     | 1,348,729                     | 846,882                    | 9,854                                   | 9,806                                   | <b>1.164</b>                    | 59.90                   | <b>5.13</b>                                       | 2,310                                       | 58.20                              | <b>4.75</b>                                              |
| Bacho Kiro AA7-738  | SP7098      | 30.4                                          | E9294              | 10                                                  | A11198     | 2.84E+09                                      | 1.07E+06                                     | 2,084,489                     | 1,256,707                  | 312                                     | 312                                     | <b>0.025</b>                    | 45.10                   | <b>0.01</b>                                       | 124                                         | 45.30                              | <b>0.01</b>                                              |
|                     |             |                                               |                    | 10                                                  | A12358     | 4.58E+09                                      | 1.34E+06                                     | 535,634                       | 321,994                    | 100                                     | 100                                     | <b>0.031</b>                    | 46.70                   | <b>0.02</b>                                       | 32                                          | 45.80                              | <b>0.02</b>                                              |
|                     |             |                                               |                    | 10                                                  | A12554     | 4.05E+09                                      | 7.37E+05                                     | 4,376,821                     | 2,632,838                  | 676                                     | 676                                     | <b>0.026</b>                    | 45.80                   | <b>0.01</b>                                       | 239                                         | 49.40                              | <b>0.02</b>                                              |
|                     |             |                                               |                    | 10                                                  | A12945     | 5.88E+09                                      | 1.12E+06                                     | 1,446,743                     | 913,218                    | 170                                     | 170                                     | <b>0.019</b>                    | 45.90                   | <b>0.02</b>                                       | 48                                          | 45.10                              | <b>0.01</b>                                              |
|                     |             |                                               |                    | 10                                                  | A15717     | 5.06E+09                                      | 9.95E+05                                     | 1,746,767                     | 1,134,892                  | 224                                     | 222                                     | <b>0.020</b>                    | 47.40                   | <b>0.02</b>                                       | 81                                          | 48.20                              | <b>0.02</b>                                              |
| Bacho Kiro BB7-240  | SP7099      | 32.1                                          | E9295              | 10                                                  | A11199     | 1.35E+10                                      | 2.21E+05                                     | 2,927,566                     | 1,596,869                  | 7,227                                   | 7,197                                   | <b>0.453</b>                    | 50.40                   | <b>0.74</b>                                       | 2,417                                       | 49.40                              | <b>0.92</b>                                              |
|                     |             |                                               |                    | 10                                                  | A12359     | 8.39E+09                                      | 2.09E+05                                     | 542,128                       | 277,697                    | 1,160                                   | 1,160                                   | <b>0.418</b>                    | 50.80                   | <b>0.40</b>                                       | 367                                         | 49.70                              | <b>0.47</b>                                              |
|                     |             |                                               |                    | 10                                                  | A12555     | 7.90E+09                                      | 1.82E+05                                     | 3,986,361                     | 2,046,644                  | 9,148                                   | 9,112                                   | <b>0.447</b>                    | 50.10                   | <b>0.40</b>                                       | 2,958                                       | 45.50                              | <b>0.44</b>                                              |
|                     |             |                                               |                    | 10                                                  | A12946     | 1.32E+10                                      | 2.80E+05                                     | 2,719,208                     | 1,520,238                  | 6,012                                   | 5,995                                   | <b>0.395</b>                    | 51.50                   | <b>0.66</b>                                       | 1,989                                       | 50.70                              | <b>0.82</b>                                              |
|                     |             |                                               |                    | 10                                                  | A15718     | 1.72E+10                                      | 3.12E+05                                     | 1,405,586                     | 814,990                    | 3,171                                   | 3,158                                   | <b>0.389</b>                    | 52.00                   | <b>0.88</b>                                       | 1,012                                       | 51.20                              | <b>1.06</b>                                              |
| Bacho Kiro CC7-2289 | SP9100      | 34.3                                          | E9296              | 10                                                  | A11200     | 5.60E+10                                      | 5.69E+05                                     | 2,549,574                     | 1,524,941                  | 41                                      | 41                                      | <b>0.003</b>                    | 47.60                   | <b>0.03</b>                                       | 10                                          | 45.70                              | <b>0.02</b>                                              |
|                     |             |                                               |                    | 10                                                  | A12360     | 2.70E+10                                      | 9.17E+05                                     | 509,637                       | 296,520                    | 6                                       | 6                                       | <b>0.002</b>                    | 50.80                   | <b>0.01</b>                                       | 1                                           | 38.00                              | <b>0.00</b>                                              |
|                     |             |                                               |                    | 10                                                  | A12556     | 2.12E+10                                      | 5.03E+05                                     | 3,539,956                     | 2,049,743                  | 76                                      | 75                                      | <b>0.004</b>                    | 47.10                   | <b>0.01</b>                                       | 20                                          | 49.30                              | <b>0.01</b>                                              |
|                     |             |                                               |                    | 10                                                  | A12947     | 3.45E+10                                      | 7.84E+05                                     | 1,756,046                     | 1,067,036                  | 28                                      | 28                                      | <b>0.003</b>                    | 47.70                   | <b>0.02</b>                                       | 4                                           | 53.50                              | <b>0.01</b>                                              |
|                     |             |                                               |                    | 10                                                  | A15719     | 3.56E+10                                      | 6.20E+05                                     | 1,289,201                     | 818,443                    | 19                                      | 19                                      | <b>0.002</b>                    | 43.10                   | <b>0.02</b>                                       | 5                                           | 42.20                              | <b>0.01</b>                                              |
| Bacho Kiro CC7-335  | SP9101      | 52.4                                          | E9297              | 10                                                  | A11201     | 3.07E+09                                      | 9.20E+05                                     | 2,919,402                     | 1,772,388                  | 11,887                                  | 11,832                                  | <b>0.671</b>                    | 49.70                   | <b>0.27</b>                                       | 4,300                                       | 49.30                              | <b>0.37</b>                                              |
|                     |             |                                               |                    | 10                                                  | A12361     | 4.17E+09                                      | 1.62E+06                                     | 587,919                       | 346,613                    | 2,058                                   | 2,058                                   | <b>0.594</b>                    | 48.70                   | <b>0.31</b>                                       | 756                                         | 48.00                              | <b>0.43</b>                                              |
|                     |             |                                               |                    | 10                                                  | A12557     | 2.81E+09                                      | 7.00E+05                                     | 3,317,600                     | 2,027,299                  | 11,656                                  | 11,623                                  | <b>0.575</b>                    | 49.60                   | <b>0.21</b>                                       | 4,232                                       | 66.20                              | <b>0.39</b>                                              |
|                     |             |                                               |                    | 10                                                  | A12948     | 4.45E+09                                      | 1.15E+06                                     | 1,450,595                     | 916,440                    | 4,403                                   | 4,384                                   | <b>0.480</b>                    | 49.70                   | <b>0.29</b>                                       | 1,568                                       | 49.40                              | <b>0.40</b>                                              |
|                     |             |                                               |                    | 10                                                  | A15720     | 6.90E+09                                      | 1.31E+06                                     | 2,061,774                     | 1,339,133                  | 6,297                                   | 6,269                                   | <b>0.470</b>                    | 49.60                   | <b>0.45</b>                                       | 2,282                                       | 49.30                              | <b>0.63</b>                                              |
| Bacho Kiro F6-597   | SP9102      | 45.6                                          | E9298              | 10                                                  | A11202     | 7.75E+10                                      | 7.46E+05                                     | 3,146,382                     | 2,094,007                  | 100                                     | 100                                     | <b>0.005</b>                    | 60.80                   | <b>0.13</b>                                       | 11                                          | 45.50                              | <b>0.00</b>                                              |
|                     |             |                                               |                    | 10                                                  | A12362     | 4.76E+10                                      | 1.27E+06                                     | 540,795                       | 346,748                    | 16                                      | 16                                      | <b>0.005</b>                    | 61.80                   | <b>0.06</b>                                       | -                                           | 54.50                              | <b>0.00</b>                                              |
|                     |             |                                               |                    | 10                                                  | A12558     | 4.21E+10                                      | 6.55E+05                                     | 4,011,897                     | 2,566,726                  | 100                                     | 100                                     | <b>0.004</b>                    | 60.70                   | <b>0.05</b>                                       | 4                                           | 86.90                              | <b>0.00</b>                                              |
|                     |             |                                               |                    | 10                                                  | A12949     | 4.89E+10                                      | 1.06E+06                                     | 1,691,740                     | 1,128,437                  | 52                                      | 52                                      | <b>0.005</b>                    | 53.70                   | <b>0.06</b>                                       | 1                                           | 43.00                              | <b>0.00</b>                                              |
|                     |             |                                               |                    | 10                                                  | A15721     | 6.44E+10                                      | 1.04E+06                                     | 1,309,894                     | 907,334                    | 32                                      | 32                                      | <b>0.004</b>                    | 62.40                   | <b>0.10</b>                                       | 1                                           | 40.00                              | <b>0.00</b>                                              |
| Bacho Kiro BK-1653  | SP7103      | 67.9                                          | E9299              | 10                                                  | A11203     | 2.44E+10                                      | 8.28E+05                                     | 2,530,593                     | 1,381,741                  | 11,825                                  | 11,783                                  | <b>0.856</b>                    | 55.70                   | <b>2.82</b>                                       | 1,880                                       | 55.00                              | <b>1.66</b>                                              |
|                     |             |                                               |                    | 10                                                  | A12363     | 2.14E+10                                      | 1.47E+06                                     | 549,052                       | 300,572                    | 2,028                                   | 2,028                                   | <b>0.675</b>                    | 55.00                   | <b>1.97</b>                                       | 318                                         | 46.10                              | <b>0.95</b>                                              |
|                     |             |                                               |                    | 10                                                  | A12562     | 1.63E+10                                      | 9.64E+05                                     | 3,625,907                     | 2,020,940                  | 14,612                                  | 14,567                                  | <b>0.723</b>                    | 55.50                   | <b>1.61</b>                                       | 2,266                                       | 55.10                              | <b>0.94</b>                                              |
|                     |             |                                               |                    | 10                                                  | A12950     | 1.93E+10                                      | 1.01E+06                                     | 2,167,430                     | 1,216,492                  | 8,285                                   | 8,263                                   | <b>0.681</b>                    | 55.80                   | <b>1.83</b>                                       | 1,173                                       | 54.80                              | <b>0.95</b>                                              |
|                     |             |                                               |                    | 10                                                  | A15722     | 3.06E+10                                      | 1.13E+06                                     | 1,735,623                     | 1,007,674                  | 6,486                                   | 6,456                                   | <b>0.644</b>                    | 56.10                   | <b>2.82</b>                                       | 929                                         | 56.10                              | <b>1.53</b>                                              |
| Oase1               | SP2538      | 24.8                                          | E1406 <sup>+</sup> | 5                                                   | A12968     | 3.36E+10                                      | 8.85E+05                                     | 1,891,916                     | 998,108                    | 1,462                                   | 1,452                                   | <b>0.146</b>                    | 49.70                   | <b>0.54</b>                                       | 337                                         | 48.60                              | <b>0.10</b>                                              |
|                     |             | 10.3                                          | E1843 <sup>+</sup> | 5                                                   | A12967     | 9.47E+10                                      | 8.38E+05                                     | 2,252,369                     | 1,289,806                  | 668                                     | 666                                     | <b>0.052</b>                    | 49.30                   | <b>0.66</b>                                       | 147                                         | 46.80                              | <b>0.10</b>                                              |
|                     |             | 15                                            | E6735              | 10                                                  | A12384     | 2.11E+09                                      | 1.34E+06                                     | 488,744                       | 236,662                    | 350                                     | 350                                     | <b>0.148</b>                    | 48.90                   | <b>0.03</b>                                       | 90                                          | 50.00                              | <b>0.01</b>                                              |
|                     |             |                                               |                    | 10                                                  | A12590     | 1.58E+09                                      | 8.57E+05                                     | 2,915,887                     | 1,501,927                  | 2,335                                   | 2,327                                   | <b>0.155</b>                    | 49.70                   | <b>0.03</b>                                       | 588                                         | 46.70                              | <b>0.01</b>                                              |
|                     |             |                                               |                    | 10                                                  | A12955     | 2.10E+09                                      | 1.15E+06                                     | 2,174,525                     | 1,111,248                  | 1,411                                   | 1,406                                   | <b>0.127</b>                    | 50.00                   | <b>0.03</b>                                       | 334                                         | 49.00                              | <b>0.01</b>                                              |
|                     |             |                                               |                    | 10                                                  | F9015      | 2.18E+09                                      | 1.41E+06                                     | 1,788,088                     | 877,011                    | 1,359                                   | 1,359                                   | <b>0.155</b>                    | 47.40                   | <b>0.03</b>                                       | 322                                         | 47.60                              | <b>0.01</b>                                              |

519 \* As determined using quantitative PCR (qPCR), <sup>+</sup> DNA extracts made in the previous study (*Fu et al.*<sup>8</sup>); mg – milligram, µL – microlitre, bp – base pairs, MQ – mapping quality

520 **Table S2.2 Frequencies of C-to-T substitutions at terminal positions of the sequence**  
 521 **alignments for the libraries generated by shotgun sequencing.** The C-to-T substitution  
 522 frequencies are determined on the mapped fragments longer than 35 base pairs with mapping  
 523 quality of at least 25 ( $MQ \geq 25$ ) reported in the Table S2.1. 95% binomial confidence intervals  
 524 (CI) are provided in brackets. C – cytosine, T – thymine.

| Specimen                   | Library ID | All fragments    |                   | Fragments with C-to-T substitutions at the opposing end |                   |
|----------------------------|------------|------------------|-------------------|---------------------------------------------------------|-------------------|
|                            |            | 5' C→T [95% CI]  | 3' C → T [95% CI] | 5' C→T [95% CI]                                         | 3' C → T [95% CI] |
| <b>Bacho Kiro F6-620</b>   | A11197     | 41.8 [40.3-43.3] | 34 [32.5-35.4]    | 44.2 [38.8-49.7]                                        | 39.2 [34.0-44.1]  |
|                            | A12357     | 42.0 [38.8-45.2] | 29.7 [26.7-32.8]  | 50.0 [36.6-63.4]                                        | 29.8 [21.0-40.2]  |
|                            | A12550     | 41.4 [40.0-42.7] | 32.0 [30.7-33.4]  | 42.5 [37.2-47.4]                                        | 36.5 [31.8-41.0]  |
|                            | A12944     | 41.2 [39.7-42.6] | 33.0 [31.6-34.5]  | 42.7 [36.5-48.3]                                        | 32.3 [27.6-37.3]  |
|                            | A15716     | 41.5 [39.4-43.6] | 30.0 [28.0-32.0]  | 41.8 [33.4-50.7]                                        | 30.2 [23.2-36.9]  |
| <b>Bacho Kiro AA7-738</b>  | A11198     | 65.8 [53.3-74.3] | 53.8 [41.6-63.3]  | 87.5 [52.9-97.8]                                        | 58.3 [25.4-74.6]  |
|                            | A12358     | 76.9 [53.9-86.3] | 37.5 [18.5-61.4]  | 66.7 [20.8-93.9]                                        | 66.7 [20.8-93.9]  |
|                            | A12554     | 50.6 [43.0-58.2] | 46.5 [37.8-54.0]  | 38.5 [17.7-64.5]                                        | 35.7 [11.7-54.6]  |
|                            | A12945     | 45.2 [29.1-57.8] | 35.7 [21.0-48.4]  | 66.7 [30.0-90.3]                                        | 57.1 [15.8-75.0]  |
|                            | A15717     | 57.8 [43.3-71.0] | 34.7 [21.2-46.6]  | 50.0 [9.5-90.5]                                         | 14.3 [2.6-51.3]   |
| <b>Bacho Kiro BB7-240</b>  | A11199     | 56.7 [54.3-59.0] | 42.4 [39.9-44.8]  | 63.3 [54.3-70.2]                                        | 41.5 [35.1-48.2]  |
|                            | A12359     | 50.0 [44.2-55.8] | 41.3 [35.5-47.3]  | 46.2 [28.8-64.5]                                        | 40.0 [24.6-57.7]  |
|                            | A12555     | 55.6 [53.5-57.7] | 38.1 [35.9-40.2]  | 52.6 [45.0-59.1]                                        | 38.3 [32.3-44.0]  |
|                            | A12946     | 53.7 [51.2-56.2] | 38.9 [36.2-41.5]  | 49.7 [41.6-57.7]                                        | 38.2 [31.5-45.3]  |
|                            | A15718     | 49.1 [45.5-52.4] | 38.7 [34.9-42.3]  | 55.7 [42.7-65.4]                                        | 46.4 [35.0-55.9]  |
| <b>Bacho Kiro CC7-2289</b> | A11200     | 43.8 [23.1-66.8] | 33.3 [3.0-56.4]   | 100 [20.7-100.0]                                        | 100 [20.7-100.0]  |
|                            | A12360     | NA [N/A]         | 0.0 [0.0-65.8]    | NA [N/A]                                                | NA [NA]           |
|                            | A12556     | 30.4 [15.6-50.9] | 29.4 [13.3-53.1]  | 0.0 [0.0-79.3]                                          | NA [NA]           |
|                            | A12947     | 33.3 [6.3-54.7]  | 0.0 [0.0-39.0]    | NA [N/A]                                                | 0.0 [0.0-79.3]    |
|                            | A15719     | 75.0 [30.1-95.4] | 0.0 [0.0-49.0]    | NA [N/A]                                                | 0.0 [0.0-79.3]    |
| <b>Bacho Kiro CC7-335</b>  | A11201     | 58.7 [56.9-60.5] | 45.1 [43.1-47.1]  | 56.5 [50.1-62.0]                                        | 42.9 [37.8-48.2]  |
|                            | A12361     | 62.7 [58.1-66.7] | 42.8 [38.1-47.6]  | 64.1 [45.9-75.1]                                        | 43.9 [30.2-55.0]  |
|                            | A12557     | 56.3 [54.4-58.1] | 45.6 [43.6-47.7]  | 51.4 [44.8-57.2]                                        | 44.8 [39.1-50.5]  |
|                            | A12948     | 56.6 [53.5-59.5] | 45.4 [42.0-48.6]  | 56.9 [46.6-64.9]                                        | 49.6 [41.0-58.2]  |
|                            | A15720     | 58.8 [56.3-61.2] | 43.9 [41.0-46.6]  | 58.7 [50.2-65.5]                                        | 44.8 [38.1-51.7]  |
| <b>Bacho Kiro F6-597</b>   | A11202     | 26.3 [8.5-43.3]  | 5.3 [0.0-16.8]    | NA [N/A]                                                | NA [NA]           |
|                            | A12362     | 0.0 [0.0-56.2]   | 0.0 [0.0-65.8]    | NA [N/A]                                                | NA [NA]           |
|                            | A12558     | 0.0 [0.0-20.4]   | 9.1 [0.8-21.8]    | NA [N/A]                                                | NA [NA]           |
|                            | A12949     | 0.0 [0.0-27.8]   | 6.7 [1.2-29.8]    | NA [N/A]                                                | NA [NA]           |
|                            | A15721     | 0.0 [0.0-35.4]   | 16.7 [3.0-56.4]   | NA [N/A]                                                | NA [NA]           |
| <b>Bacho Kiro BK-1653</b>  | A11203     | 26.8 [25.2-28.5] | 18.9 [17.3-20.5]  | 30.1 [22.1-39.5]                                        | 22.1 [15.4-28.9]  |
|                            | A12363     | 25.8 [22.1-30.0] | 16.8 [13.4-20.9]  | 44.4 [20.3-61.4]                                        | 36.4 [19.7-57.0]  |
|                            | A12562     | 24.8 [23.3-26.2] | 18.4 [17.0-19.9]  | 29.1 [21.2-36.7]                                        | 25.0 [18.7-32.5]  |
|                            | A12950     | 25.0 [23.1-27.0] | 15.6 [13.8-17.4]  | 29.4 [19.9-41.1]                                        | 22.0 [14.7-31.5]  |
|                            | A15722     | 27.1 [24.9-29.4] | 13.7 [11.9-15.8]  | 48.1 [27.6-62.7]                                        | 14.3 [8.5-22.9]   |
| <b>Oase1</b>               | A12968*    | 38.5 [33.1-43.6] | 37.6 [31.1-43.6]  | 50.0 [28.0-72.0]                                        | 38.1 [20.8-59.1]  |
|                            | A12967*    | 39.1 [31.8-46.9] | 30.4 [22.8-39.4]  | 80.0 [37.6-96.4]                                        | 40.0 [16.8-68.7]  |
|                            | A12384     | 33.8 [24.3-44.6] | 35.5 [23.3-46.3]  | 33.3 [0.0-56.2]                                         | 33.3 [0.0-56.2]   |
|                            | A12590     | 36.7 [32.7-40.5] | 32.7 [28.3-37.0]  | 37.2 [24.4-52.1]                                        | 42.1 [25.6-55.3]  |
|                            | A12955     | 35.6 [30.5-41.0] | 31.7 [26.3-37.7]  | 35.3 [13.3-53.1]                                        | 26.1 [9.7-41.9]   |
|                            | F9015      | 34.2 [29.2-39.5] | 36.9 [30.8-42.6]  | 29.2 [14.9-49.2]                                        | 41.2 [21.6-64.0]  |

525 \* New libraries prepared from two extracts used in a previous study (Fu et al.<sup>8</sup>)

526 **Table S2.3 Summary statistics of the Bacho Kiro and *Oase1* DNA libraries captured with**  
527 **the SNP Panel 1 or “390k”<sup>15</sup> array.** The number of SNPs on target are determined using the  
528 unique fragments longer than 35 base pairs ( $L \geq 35$  bp) with mapping quality of at least 25  
529 ( $MQ \geq 25$ ) that overlap the SNPs on the “390k” array<sup>15</sup>.

| Specimen            | All fragments |                               |                                  |                                                       |                                                                 |                                                                 |                          |                     | Fragments with terminal C-to-T substitutions                        |                          |                     |
|---------------------|---------------|-------------------------------|----------------------------------|-------------------------------------------------------|-----------------------------------------------------------------|-----------------------------------------------------------------|--------------------------|---------------------|---------------------------------------------------------------------|--------------------------|---------------------|
|                     | Library ID    | Number of sequenced fragments | Number of fragments $\geq 35$ bp | Number of mapped fragments $\geq 35$ bp, $MQ \geq 25$ | Number of mapped fragments on target $\geq 35$ bp, $MQ \geq 25$ | Number of unique fragments on target $\geq 35$ bp, $MQ \geq 25$ | Number of SNPs on target | % of SNPs on target | Number of deaminated fragments on target $\geq 35$ bp, $MQ \geq 25$ | Number of SNPs on target | % of SNPs on target |
| Bacho Kiro F6-620   | A11197        | 11,899,581                    | 8,645,070                        | 3,467,069                                             | 1,561,833                                                       | 1,001,291                                                       | 316,864                  | 80.47               | 259,815                                                             | 172,587                  | 43.83               |
|                     | A12357        | 10,869,174                    | 8,052,475                        | 2,598,741                                             | 1,317,844                                                       | 880,398                                                         | 300,283                  | 76.25               | 213,441                                                             | 149,237                  | 37.90               |
|                     | A12550        | 8,917,113                     | 6,472,270                        | 1,909,121                                             | 1,050,064                                                       | 701,836                                                         | 274,734                  | 69.77               | 166,987                                                             | 124,241                  | 31.55               |
|                     | A12944        | 9,586,753                     | 7,103,310                        | 2,090,003                                             | 1,024,769                                                       | 677,230                                                         | 272,094                  | 69.10               | 159,465                                                             | 120,418                  | 30.58               |
|                     | A15716        | 1,671,876                     | 1,334,551                        | 599,155                                               | 463,053                                                         | 349,380                                                         | 191,006                  | 48.50               | 80,224                                                              | 68,100                   | 17.29               |
|                     | merged        | 42,944,497                    | 31,607,676                       | 10,664,089                                            | 5,417,563                                                       | 3,610,135                                                       | 372,571                  | 94.61               | 879,932                                                             | 294,287                  | 74.73               |
| Bacho Kiro AA7-738  | A11198        | 12,145,465                    | 8,700,739                        | 175,278                                               | 23,854                                                          | 8,343                                                           | 7,806                    | 1.98                | 3,178                                                               | 3,104                    | 0.79                |
|                     | A12358        | 1,410,251                     | 1,047,605                        | 38,811                                                | 12,811                                                          | 7,112                                                           | 6,793                    | 1.73                | 1,895                                                               | 1,885                    | 0.48                |
|                     | A12554        | 1,533,400                     | 1,104,923                        | 37,071                                                | 10,079                                                          | 5,072                                                           | 4,840                    | 1.23                | 1,813                                                               | 1,798                    | 0.46                |
|                     | A12945        | 1,635,213                     | 1,227,385                        | 31,282                                                | 10,294                                                          | 5,381                                                           | 5,128                    | 1.30                | 2,000                                                               | 1,980                    | 0.50                |
|                     | A15717        | 27,180,764                    | 10,263,094                       | 297,329                                               | 11,099                                                          | 3,526                                                           | 2,910                    | 0.74                | 1,089                                                               | 1,022                    | 0.26                |
|                     | merged        | 43,905,093                    | 22,343,746                       | 579,771                                               | 68,137                                                          | 29,434                                                          | 26,299                   | 6.68                | 9,975                                                               | 9,629                    | 2.45                |
| Bacho Kiro BB7-240  | A11199        | 13,252,473                    | 9,002,008                        | 2,123,764                                             | 487,691                                                         | 235,156                                                         | 163,518                  | 41.52               | 84,770                                                              | 73,710                   | 18.72               |
|                     | A12359        | 12,593,847                    | 8,262,403                        | 1,227,745                                             | 374,230                                                         | 198,565                                                         | 143,427                  | 36.42               | 69,051                                                              | 61,084                   | 15.51               |
|                     | A12555        | 10,688,993                    | 6,831,509                        | 807,933                                               | 299,881                                                         | 158,830                                                         | 120,932                  | 30.71               | 54,468                                                              | 49,494                   | 12.57               |
|                     | A12946        | 10,720,721                    | 7,377,939                        | 946,511                                               | 329,501                                                         | 182,060                                                         | 132,737                  | 33.71               | 60,886                                                              | 54,551                   | 13.85               |
|                     | A15718        | 1,423,176                     | 1,057,610                        | 322,999                                               | 174,753                                                         | 118,568                                                         | 93,947                   | 23.86               | 38,486                                                              | 35,757                   | 9.08                |
|                     | merged        | 48,679,210                    | 32,531,469                       | 5,428,952                                             | 1,666,056                                                       | 893,179                                                         | 311,587                  | 79.13               | 307,661                                                             | 191,684                  | 48.68               |
| Bacho Kiro CC7-2289 | A11200        | 11,083,652                    | 7,875,798                        | 26,040                                                | 7,442                                                           | 2,427                                                           | 2,375                    | 0.60                | 583                                                                 | 586                      | 0.15                |
|                     | A12360        | 1,698,092                     | 1,187,404                        | 8,578                                                 | 4,113                                                           | 2,267                                                           | 2,258                    | 0.57                | 350                                                                 | 357                      | 0.09                |
|                     | A12556        | 1,440,718                     | 1,007,689                        | 5,788                                                 | 2,839                                                           | 1,521                                                           | 1,504                    | 0.38                | 339                                                                 | 337                      | 0.09                |
|                     | A12947        | 1,280,691                     | 939,834                          | 3,974                                                 | 2,382                                                           | 1,268                                                           | 1,256                    | 0.32                | 256                                                                 | 258                      | 0.07                |
|                     | A15719        | 1,496,778                     | 1,115,292                        | 7,269                                                 | 3,034                                                           | 1,614                                                           | 1,405                    | 0.36                | 300                                                                 | 284                      | 0.07                |
|                     | merged        | 16,999,931                    | 12,126,017                       | 51,649                                                | 19,810                                                          | 9,097                                                           | 8,659                    | 2.20                | 1,828                                                               | 1,816                    | 0.46                |
| Bacho Kiro CC7-335  | A11201        | 11,973,014                    | 8,804,658                        | 2,337,293                                             | 418,725                                                         | 165,324                                                         | 126,717                  | 32.18               | 63,194                                                              | 56,815                   | 14.43               |
|                     | A12361        | 11,406,591                    | 8,205,044                        | 1,377,993                                             | 360,202                                                         | 163,136                                                         | 123,327                  | 31.32               | 59,292                                                              | 53,333                   | 13.54               |
|                     | A12557        | 10,742,241                    | 7,714,075                        | 1,012,327                                             | 325,196                                                         | 147,895                                                         | 113,536                  | 28.83               | 55,405                                                              | 50,031                   | 12.71               |
|                     | A12948        | 10,627,567                    | 7,762,120                        | 1,116,051                                             | 290,639                                                         | 131,242                                                         | 102,830                  | 26.11               | 48,974                                                              | 44,518                   | 11.31               |
|                     | A15720        | 1,584,771                     | 1,275,920                        | 412,202                                               | 163,168                                                         | 99,826                                                          | 81,481                   | 20.69               | 36,322                                                              | 33,796                   | 8.58                |
|                     | merged        | 46,334,184                    | 33,761,817                       | 6,255,866                                             | 1,557,930                                                       | 707,423                                                         | 290,832                  | 73.85               | 263,187                                                             | 174,782                  | 44.38               |
| Bacho Kiro BK-1653  | A11203        | 11,703,301                    | 8,659,849                        | 2,859,809                                             | 1,100,323                                                       | 599,073                                                         | 273,924                  | 69.56               | 96,817                                                              | 83,025                   | 21.08               |
|                     | A12363        | 11,951,100                    | 8,517,115                        | 1,909,417                                             | 898,108                                                         | 549,819                                                         | 254,152                  | 64.54               | 84,654                                                              | 72,863                   | 18.50               |
|                     | A12562        | 10,428,783                    | 7,311,600                        | 1,643,754                                             | 669,793                                                         | 398,421                                                         | 218,118                  | 55.39               | 60,080                                                              | 54,159                   | 13.75               |
|                     | A12950        | 10,423,957                    | 7,377,054                        | 1,603,265                                             | 704,765                                                         | 423,243                                                         | 224,583                  | 57.03               | 62,556                                                              | 56,132                   | 14.25               |
|                     | A15722        | 24,068,105                    | 10,618,989                       | 5,828,548                                             | 953,264                                                         | 539,986                                                         | 272,135                  | 69.11               | 77,161                                                              | 69,213                   | 17.58               |
|                     | merged        | 68,575,246                    | 42,484,607                       | 13,844,793                                            | 4,326,253                                                       | 2,510,542                                                       | 393,788                  | 93.41               | 381,268                                                             | 215,802                  | 54.8                |
| Oase1               | A12968*       | 9,450,683                     | 6,293,578                        | 316,504                                               | 225,313                                                         | 91,716                                                          | 76,988                   | 19.55               | 19,613                                                              | 18,981                   | 4.82                |
|                     | A12967*       | 8,702,207                     | 5,908,403                        | 147,181                                               | 106,039                                                         | 41,967                                                          | 39,035                   | 9.91                | 7,468                                                               | 7,456                    | 1.89                |
|                     | A12384        | 9,523,290                     | 6,124,858                        | 355,622                                               | 259,755                                                         | 24,872                                                          | 23,254                   | 5.91                | 5,515                                                               | 5,458                    | 1.39                |
|                     | A12590        | 10,954,958                    | 7,076,935                        | 380,208                                               | 272,863                                                         | 22,833                                                          | 21,538                   | 5.47                | 5,651                                                               | 5,584                    | 1.42                |
|                     | A12955        | 9,542,825                     | 6,218,130                        | 282,570                                               | 199,618                                                         | 22,392                                                          | 21,166                   | 5.37                | 5,417                                                               | 5,390                    | 1.37                |
|                     | F9015         | 10,928,126                    | 6,664,522                        | 364,795                                               | 256,619                                                         | 19,621                                                          | 18,620                   | 4.73                | 4,892                                                               | 4,845                    | 1.23                |
|                     | merged        | 59,102,089                    | 38,286,426                       | 1,846,880                                             | 1,320,207                                                       | 223,401                                                         | 155,508                  | 39.49               | 48,556                                                              | 44,591                   | 11.32               |

530 \* New libraries prepared from two extracts used in a previous study (Fu et al.<sup>8</sup>)

531 **Table S2.4 Summary statistics of the Bacho Kiro and *Oase1* DNA libraries captured with**  
 532 **the SNP Panel 2 or “840k”<sup>8</sup> array.** The number of SNPs on target are determined using the  
 533 unique fragments longer than 35 base pairs with mapping quality of at least 25 ( $MQ \geq 25$ ) that  
 534 overlap the SNPs on the “840k” array<sup>8</sup>.

| Specimen            | All fragments |                               |                                  |                                                       |                                                                 |                                                                 |                          |                     | Fragments with terminal C-to-T substitutions                        |                          |                     |
|---------------------|---------------|-------------------------------|----------------------------------|-------------------------------------------------------|-----------------------------------------------------------------|-----------------------------------------------------------------|--------------------------|---------------------|---------------------------------------------------------------------|--------------------------|---------------------|
|                     | Library ID    | Number of sequenced fragments | Number of fragments $\geq 35$ bp | Number of mapped fragments $\geq 35$ bp, $MQ \geq 25$ | Number of mapped fragments on target $\geq 35$ bp, $MQ \geq 25$ | Number of unique fragments on target $\geq 35$ bp, $MQ \geq 25$ | Number of SNPs on target | % of SNPs on target | Number of deaminated fragments on target $\geq 35$ bp, $MQ \geq 25$ | Number of SNPs on target | % of SNPs on target |
| Bacho Kiro F6-620   | A11197        | 22,926,356                    | 17,251,602                       | 6,317,820                                             | 4,319,293                                                       | 1,741,983                                                       | 616,855                  | 73.21               | 453,942                                                             | 315,619                  | 37.46               |
|                     | A12357        | 18,328,399                    | 13,704,688                       | 5,215,324                                             | 3,667,130                                                       | 1,698,935                                                       | 595,206                  | 70.64               | 416,479                                                             | 291,769                  | 34.63               |
|                     | A12550        | 9,342,745                     | 6,882,903                        | 2,425,491                                             | 1,693,850                                                       | 971,643                                                         | 458,798                  | 54.45               | 232,921                                                             | 185,707                  | 22.04               |
|                     | A12944        | 9,442,994                     | 7,140,283                        | 2,427,405                                             | 1,663,189                                                       | 908,195                                                         | 441,659                  | 52.41               | 215,546                                                             | 173,808                  | 20.63               |
|                     | A15716        | 8,821,338                     | 7,040,301                        | 2,635,727                                             | 1,826,406                                                       | 1,029,637                                                       | 480,163                  | 56.98               | 241,148                                                             | 192,930                  | 22.90               |
|                     | merged        | 68,861,832                    | 52,019,777                       | 19,021,767                                            | 13,169,868                                                      | 6,350,393                                                       | 757,051                  | 89.84               | 1,560,036                                                           | 558,143                  | 66.24               |
| Bacho Kiro AA7-738  | A11198        | 23,445,403                    | 17,152,839                       | 310,849                                               | 186,370                                                         | 15,639                                                          | 14,804                   | 1.76                | 5,889                                                               | 5,835                    | 0.69                |
|                     | A12358        | 7,757,929                     | 5,754,460                        | 130,802                                               | 83,632                                                          | 15,563                                                          | 14,912                   | 1.77                | 4,146                                                               | 4,134                    | 0.49                |
|                     | A12554        | 11,338,006                    | 8,280,216                        | 126,265                                               | 74,600                                                          | 11,717                                                          | 11,193                   | 1.33                | 4,257                                                               | 4,235                    | 0.50                |
|                     | A12945        | 11,004,643                    | 8,279,751                        | 117,146                                               | 69,354                                                          | 12,179                                                          | 11,563                   | 1.37                | 4,455                                                               | 4,413                    | 0.52                |
|                     | A15717        | 9,125,030                     | 7,040,076                        | 105,180                                               | 65,037                                                          | 8,940                                                           | 8,561                    | 1.02                | 3,182                                                               | 3,162                    | 0.38                |
|                     | merged        | 62,671,011                    | 46,507,342                       | 790,242                                               | 478,993                                                         | 64,038                                                          | 58,037                   | 6.89                | 21,929                                                              | 21,376                   | 2.54                |
| Bacho Kiro BB7-240  | A11199        | 23,835,075                    | 16,599,615                       | 3,378,384                                             | 2,167,599                                                       | 412,089                                                         | 298,929                  | 35.48               | 148,602                                                             | 131,835                  | 15.65               |
|                     | A12359        | 18,972,864                    | 12,867,006                       | 2,658,602                                             | 1,788,537                                                       | 392,301                                                         | 286,854                  | 34.04               | 136,778                                                             | 122,184                  | 14.50               |
|                     | A12555        | 9,876,045                     | 6,388,464                        | 1,089,368                                             | 687,569                                                         | 248,874                                                         | 198,827                  | 23.60               | 85,335                                                              | 79,414                   | 9.42                |
|                     | A12946        | 10,762,884                    | 7,482,516                        | 1,439,478                                             | 949,797                                                         | 300,368                                                         | 228,456                  | 27.11               | 101,665                                                             | 92,842                   | 11.02               |
|                     | A15718        | 8,597,668                     | 6,361,984                        | 1,249,878                                             | 818,538                                                         | 296,802                                                         | 228,514                  | 27.12               | 98,833                                                              | 90,938                   | 10.79               |
|                     | merged        | 72,044,536                    | 49,699,585                       | 9,815,710                                             | 6,412,040                                                       | 1,650,434                                                       | 610,752                  | 72.48               | 571,213                                                             | 362,810                  | 43.06               |
| Bacho Kiro CC7-2289 | A11200        | 20,095,361                    | 14,382,395                       | 49,188                                                | 21,615                                                          | 4,494                                                           | 4,369                    | 0.52                | 1,105                                                               | 1,107                    | 0.13                |
|                     | A12360        | 9,231,418                     | 6,549,521                        | 31,000                                                | 16,370                                                          | 4,685                                                           | 4,673                    | 0.55                | 707                                                                 | 718                      | 0.09                |
|                     | A12556        | 10,052,171                    | 7,227,057                        | 25,443                                                | 12,110                                                          | 3,452                                                           | 3,387                    | 0.40                | 659                                                                 | 657                      | 0.08                |
|                     | A12947        | 8,705,372                     | 6,410,889                        | 20,132                                                | 9,369                                                           | 3,090                                                           | 3,074                    | 0.36                | 643                                                                 | 654                      | 0.08                |
|                     | A15719        | 10,531,118                    | 7,990,473                        | 25,153                                                | 11,751                                                          | 3,000                                                           | 2,938                    | 0.35                | 602                                                                 | 612                      | 0.07                |
|                     | merged        | 58,615,440                    | 42,560,335                       | 150,916                                               | 71,215                                                          | 18,721                                                          | 18,151                   | 2.15                | 3,716                                                               | 3,731                    | 0.44                |
| Bacho Kiro CC7-335  | A11201        | 21,338,266                    | 15,910,234                       | 3,627,638                                             | 2,258,383                                                       | 301,906                                                         | 236,938                  | 28.12               | 114,807                                                             | 104,619                  | 12.42               |
|                     | A12361        | 17,989,048                    | 13,218,581                       | 2,762,393                                             | 1,794,352                                                       | 317,663                                                         | 242,641                  | 28.80               | 116,021                                                             | 105,046                  | 12.47               |
|                     | A12557        | 9,943,887                     | 7,176,315                        | 1,143,312                                             | 711,224                                                         | 217,233                                                         | 176,557                  | 20.95               | 80,635                                                              | 74,945                   | 8.89                |
|                     | A12948        | 10,700,557                    | 7,881,140                        | 1,482,421                                             | 951,441                                                         | 218,273                                                         | 177,072                  | 21.01               | 81,473                                                              | 75,681                   | 8.98                |
|                     | A15720        | 8,822,517                     | 7,045,295                        | 1,374,443                                             | 884,459                                                         | 235,591                                                         | 190,005                  | 22.55               | 86,348                                                              | 80,048                   | 9.50                |
|                     | merged        | 68,794,275                    | 51,231,565                       | 10,390,207                                            | 6,599,859                                                       | 1,290,666                                                       | 561,737                  | 66.66               | 479,284                                                             | 326,926                  | 38.80               |
| Bacho Kiro BK-1653  | A11203        | 19,907,962                    | 14,792,961                       | 4,541,063                                             | 2,852,991                                                       | 980,828                                                         | 494,311                  | 58.66               | 159,264                                                             | 140,173                  | 16.64               |
|                     | A12363        | 18,577,919                    | 13,793,835                       | 3,967,259                                             | 2,598,268                                                       | 1,083,564                                                       | 498,360                  | 59.14               | 168,722                                                             | 145,511                  | 17.27               |
|                     | A12562        | 10,497,458                    | 7,488,565                        | 2,071,856                                             | 1,351,877                                                       | 641,692                                                         | 370,131                  | 43.93               | 98,685                                                              | 90,063                   | 10.69               |
|                     | A12950        | 10,134,905                    | 7,228,788                        | 2,022,122                                             | 1,333,879                                                       | 573,808                                                         | 347,593                  | 41.25               | 86,127                                                              | 79,755                   | 9.47                |
|                     | A15722        | 7,626,731                     | 5,851,070                        | 1,679,486                                             | 1,093,476                                                       | 560,128                                                         | 343,387                  | 40.75               | 81,599                                                              | 76,010                   | 9.02                |
|                     | merged        | 66,744,975                    | 49,155,219                       | 14,281,786                                            | 9,230,491                                                       | 3,840,020                                                       | 694,592                  | 82.43               | 594,397                                                             | 356,855                  | 43.35               |
| Oase1               | A12968*       | 8,859,546                     | 5,932,955                        | 567,144                                               | 353,112                                                         | 138,495                                                         | 121,866                  | 14.46               | 29,657                                                              | 29,292                   | 3.48                |
|                     | A12967*       | 8,488,875                     | 5,738,835                        | 253,428                                               | 157,471                                                         | 70,717                                                          | 66,885                   | 7.94                | 13,059                                                              | 13,227                   | 1.57                |
|                     | A12384        | 8,056,658                     | 5,150,984                        | 593,089                                               | 393,101                                                         | 45,129                                                          | 42,925                   | 5.09                | 10,051                                                              | 10,074                   | 1.20                |
|                     | A12590        | 10,858,435                    | 7,137,677                        | 667,254                                               | 426,051                                                         | 43,596                                                          | 41,474                   | 4.92                | 10,750                                                              | 10,718                   | 1.27                |
|                     | A12955        | 9,605,636                     | 6,282,106                        | 387,272                                               | 236,849                                                         | 37,587                                                          | 36,004                   | 4.27                | 9,086                                                               | 9,113                    | 1.08                |
|                     | F9015         | 10,876,167                    | 6,788,033                        | 563,602                                               | 353,964                                                         | 32,728                                                          | 31,673                   | 3.76                | 8,106                                                               | 8,145                    | 0.97                |
|                     | merged        | 56,745,317                    | 37,030,590                       | 3,031,789                                             | 1,920,548                                                       | 368,252                                                         | 270,601                  | 32.11               | 80,709                                                              | 75,569                   | 8.97                |

535 \* New libraries prepared from two extracts used in a previous study (*Fu et al.*<sup>8</sup>)

536 **Table S2.5 Summary statistics of the Bacho Kiro and *Oase1* DNA libraries captured with**  
 537 **the SNP Panel 3 or “1000k”<sup>8</sup> array.** The number of SNPs on target are determined using the  
 538 unique fragments longer than 35 base pairs ( $L \geq 35$  bp) with mapping quality of at least 25  
 539 ( $MQ \geq 25$ ) that overlap the SNPs on the “1000k” array<sup>8</sup>.

| Specimen            | All fragments |                               |                                  |                                                       |                                                                 |                                                                 |                          |                     | Fragments with terminal C-to-T substitutions                        |                          |                     |
|---------------------|---------------|-------------------------------|----------------------------------|-------------------------------------------------------|-----------------------------------------------------------------|-----------------------------------------------------------------|--------------------------|---------------------|---------------------------------------------------------------------|--------------------------|---------------------|
|                     | Library ID    | Number of sequenced fragments | Number of fragments $\geq 35$ bp | Number of mapped fragments $\geq 35$ bp, $MQ \geq 25$ | Number of mapped fragments on target $\geq 35$ bp, $MQ \geq 25$ | Number of unique fragments on target $\geq 35$ bp, $MQ \geq 25$ | Number of SNPs on target | % of SNPs on target | Number of deaminated fragments on target $\geq 35$ bp, $MQ \geq 25$ | Number of SNPs on target | % of SNPs on target |
| Bacho Kiro F6-620   | A11197        | 21,991,234                    | 16,842,418                       | 6,151,477                                             | 4,155,525                                                       | 1,474,347                                                       | 608,886                  | 61.02               | 369,294                                                             | 279,759                  | 28.04               |
|                     | A12357        | 17,215,328                    | 13,186,365                       | 4,962,070                                             | 3,537,600                                                       | 1,411,543                                                       | 583,556                  | 58.49               | 332,082                                                             | 255,889                  | 25.65               |
|                     | A12550        | 11,263,593                    | 8,296,609                        | 2,744,780                                             | 1,884,129                                                       | 914,395                                                         | 464,625                  | 46.57               | 211,720                                                             | 177,776                  | 17.82               |
|                     | A12944        | 8,563,214                     | 6,441,281                        | 2,032,905                                             | 1,405,287                                                       | 722,521                                                         | 402,943                  | 40.38               | 164,717                                                             | 143,526                  | 14.38               |
|                     | A15716        | 10,575,449                    | 8,523,083                        | 3,338,770                                             | 2,401,967                                                       | 790,645                                                         | 447,152                  | 44.81               | 177,656                                                             | 156,368                  | 15.67               |
|                     | merged        | 69,608,818                    | 53,289,756                       | 19,230,002                                            | 13,384,508                                                      | 5,313,451                                                       | 808,722                  | 81.05               | 1,255,469                                                           | 537,525                  | 53.87               |
| Bacho Kiro AA7-738  | A11198        | 23,090,198                    | 17,199,659                       | 253,576                                               | 138,541                                                         | 12,213                                                          | 11,956                   | 1.20                | 4,476                                                               | 4,549                    | 0.46                |
|                     | A12358        | 7,508,510                     | 5,682,372                        | 119,420                                               | 77,957                                                          | 11,361                                                          | 11,251                   | 1.13                | 2,861                                                               | 2,894                    | 0.29                |
|                     | A12554        | 9,771,730                     | 7,268,861                        | 131,135                                               | 75,322                                                          | 7,169                                                           | 7,141                    | 0.72                | 2,508                                                               | 2,584                    | 0.26                |
|                     | A12945        | 9,416,186                     | 7,225,669                        | 106,165                                               | 61,279                                                          | 7,611                                                           | 7,573                    | 0.76                | 2,767                                                               | 2,833                    | 0.28                |
|                     | A15717        | 11,764,615                    | 4,719,341                        | 67,686                                                | 45,702                                                          | 3,006                                                           | 3,069                    | 0.31                | 955                                                                 | 999                      | 0.10                |
|                     | merged        | 61,551,239                    | 42,095,902                       | 677,982                                               | 398,801                                                         | 41,360                                                          | 39,660                   | 3.97                | 13,567                                                              | 13,677                   | 1.37                |
| Bacho Kiro BB7-240  | A11199        | 25,195,252                    | 17,475,054                       | 3,123,776                                             | 1,971,708                                                       | 327,492                                                         | 258,903                  | 25.95               | 113,777                                                             | 106,242                  | 10.65               |
|                     | A12359        | 20,696,734                    | 14,122,968                       | 2,534,285                                             | 1,679,644                                                       | 296,500                                                         | 239,061                  | 23.96               | 98,633                                                              | 93,280                   | 9.35                |
|                     | A12555        | 10,138,039                    | 6,494,073                        | 878,841                                               | 536,288                                                         | 181,137                                                         | 157,496                  | 15.78               | 59,747                                                              | 58,737                   | 5.89                |
|                     | A12946        | 10,523,868                    | 7,211,960                        | 1,060,486                                             | 681,607                                                         | 215,549                                                         | 180,387                  | 18.08               | 70,316                                                              | 67,916                   | 6.81                |
|                     | A15718        | 8,836,672                     | 6,540,204                        | 1,393,464                                             | 952,349                                                         | 188,610                                                         | 163,965                  | 16.43               | 60,393                                                              | 59,249                   | 5.94                |
|                     | merged        | 75,390,565                    | 51,844,259                       | 8,990,852                                             | 5,821,596                                                       | 1,209,288                                                       | 565,852                  | 56.71               | 402,866                                                             | 294,403                  | 29.51               |
| Bacho Kiro CC7-2289 | A11200        | 21,474,542                    | 15,685,689                       | 57,751                                                | 18,729                                                          | 3,069                                                           | 3,131                    | 0.31                | 724                                                                 | 755                      | 0.08                |
|                     | A12360        | 7,803,992                     | 5,694,060                        | 31,163                                                | 14,834                                                          | 2,034                                                           | 2,123                    | 0.21                | 270                                                                 | 285                      | 0.03                |
|                     | A12556        | 8,899,916                     | 6,493,949                        | 27,949                                                | 11,355                                                          | 1,677                                                           | 1,735                    | 0.17                | 353                                                                 | 372                      | 0.04                |
|                     | A12947        | 8,181,325                     | 6,124,722                        | 22,437                                                | 8,110                                                           | 1,487                                                           | 1,561                    | 0.16                | 273                                                                 | 293                      | 0.03                |
|                     | A15719        | 8,584,651                     | 6,634,901                        | 28,248                                                | 11,265                                                          | 1,478                                                           | 1,539                    | 0.15                | 254                                                                 | 261                      | 0.03                |
|                     | merged        | 54,944,426                    | 40,633,321                       | 167,548                                               | 64,293                                                          | 9,745                                                           | 10,003                   | 1.00                | 1,874                                                               | 1,965                    | 0.20                |
| Bacho Kiro CC7-335  | A11201        | 21,990,555                    | 16,458,472                       | 3,600,338                                             | 2,220,876                                                       | 262,444                                                         | 217,477                  | 21.80               | 96,651                                                              | 91,365                   | 9.16                |
|                     | A12361        | 20,500,220                    | 15,249,848                       | 3,227,366                                             | 2,105,982                                                       | 267,013                                                         | 217,295                  | 21.78               | 94,622                                                              | 89,027                   | 8.92                |
|                     | A12557        | 9,823,290                     | 7,102,874                        | 1,015,008                                             | 595,845                                                         | 178,230                                                         | 153,326                  | 15.37               | 64,825                                                              | 62,753                   | 6.29                |
|                     | A12948        | 11,125,768                    | 8,140,989                        | 1,347,104                                             | 845,655                                                         | 176,385                                                         | 151,287                  | 15.16               | 64,004                                                              | 61,709                   | 6.18                |
|                     | A15720        | 9,024,906                     | 7,269,772                        | 1,717,757                                             | 1,167,209                                                       | 178,891                                                         | 155,004                  | 15.53               | 63,632                                                              | 61,835                   | 6.20                |
|                     | merged        | 72,464,739                    | 54,221,955                       | 10,907,573                                            | 6,935,567                                                       | 1,062,963                                                       | 536,521                  | 53.77               | 383,734                                                             | 286,514                  | 28.72               |
| Bacho Kiro BK-1653  | A11203        | 22,558,998                    | 16,730,866                       | 5,022,091                                             | 3,206,900                                                       | 837,168                                                         | 479,689                  | 48.08               | 130,533                                                             | 121,256                  | 12.15               |
|                     | A12363        | 19,237,335                    | 14,309,074                       | 4,072,250                                             | 2,730,583                                                       | 817,869                                                         | 457,572                  | 45.86               | 122,614                                                             | 113,883                  | 11.41               |
|                     | A12562        | 11,410,950                    | 8,078,126                        | 1,918,594                                             | 1,225,111                                                       | 501,710                                                         | 332,243                  | 33.30               | 74,196                                                              | 71,885                   | 7.20                |
|                     | A12950        | 9,658,498                     | 6,839,385                        | 1,730,548                                             | 1,146,618                                                       | 444,284                                                         | 305,733                  | 30.64               | 64,164                                                              | 62,821                   | 6.30                |
|                     | A15722        | 9,521,514                     | 4,040,947                        | 1,786,417                                             | 1,328,323                                                       | 310,326                                                         | 248,582                  | 24.91               | 42,844                                                              | 43,627                   | 4.37                |
|                     | merged        | 72,387,295                    | 49,998,398                       | 14,529,900                                            | 9,637,535                                                       | 2,911,357                                                       | 726,130                  | 72.77               | 434,351                                                             | 305,619                  | 30.63               |
| Oase1               | A12968*       | 9,913,082                     | 6,526,052                        | 460,141                                               | 283,631                                                         | 97,727                                                          | 91,714                   | 9.19                | 19,696                                                              | 20,261                   | 2.03                |
|                     | A12967*       | 9,381,272                     | 6,330,765                        | 210,442                                               | 127,461                                                         | 44,136                                                          | 44,466                   | 4.46                | 7,448                                                               | 7,819                    | 0.78                |
|                     | A12384        | 9,326,741                     | 6,042,399                        | 461,129                                               | 293,613                                                         | 38,011                                                          | 37,284                   | 3.74                | 7,837                                                               | 8,053                    | 0.81                |
|                     | A12590        | 10,425,950                    | 6,753,910                        | 482,672                                               | 300,968                                                         | 33,306                                                          | 32,737                   | 3.28                | 7,658                                                               | 7,829                    | 0.78                |
|                     | A12955        | 10,204,276                    | 6,685,185                        | 358,928                                               | 211,600                                                         | 31,440                                                          | 31,056                   | 3.11                | 7,020                                                               | 7,175                    | 0.72                |
|                     | F9015         | 10,097,198                    | 6,248,272                        | 373,923                                               | 217,345                                                         | 28,323                                                          | 28,104                   | 2.82                | 6,761                                                               | 6,940                    | 0.70                |
|                     | merged        | 59,348,519                    | 38,586,583                       | 2,347,235                                             | 1,434,618                                                       | 272,943                                                         | 221,020                  | 22.15               | 56,420                                                              | 55,309                   | 5.54                |

\* New libraries prepared from two extracts used in a previous study (*Fu et al.*<sup>8</sup>)

540  
541



542 **Table S2.6 Summary statistics of the Bacho Kiro and *Oase1* DNA libraries captured with**  
543 **the SNP Panel 4 or “Archaic admixture”<sup>8</sup> array.** The number of SNPs on target are  
544 determined using the unique fragments longer than 35 base pairs ( $L \geq 35$  bp) with mapping  
545 quality of at least 25 ( $MQ \geq 25$ ) that overlap the SNPs on the “Archaic admixture” array<sup>8</sup>.

| Specimen            | All fragments |                               |                                  |                                                       |                                                                 |                                                                 |                          |                     | Fragments with terminal C-to-T substitutions                        |                          |                     |
|---------------------|---------------|-------------------------------|----------------------------------|-------------------------------------------------------|-----------------------------------------------------------------|-----------------------------------------------------------------|--------------------------|---------------------|---------------------------------------------------------------------|--------------------------|---------------------|
|                     | Library ID    | Number of sequenced fragments | Number of fragments $\geq 35$ bp | Number of mapped fragments $\geq 35$ bp, $MQ \geq 25$ | Number of mapped fragments on target $\geq 35$ bp, $MQ \geq 25$ | Number of unique fragments on target $\geq 35$ bp, $MQ \geq 25$ | Number of SNPs on target | % of SNPs on target | Number of deaminated fragments on target $\geq 35$ bp, $MQ \geq 25$ | Number of SNPs on target | % of SNPs on target |
| Bacho Kiro F6-620   | A11197        | 31,930,399                    | 23,542,084                       | 6,780,310                                             | 4,055,151                                                       | 1,886,935                                                       | 953,809                  | 54.52               | 484,643                                                             | 421,808                  | 24.11               |
|                     | A12357        | 54,684,610                    | 39,738,237                       | 11,467,222                                            | 7,539,176                                                       | 2,528,304                                                       | 1,077,024                | 61.57               | 613,646                                                             | 499,442                  | 28.55               |
|                     | A12550        | 9,906,107                     | 7,226,662                        | 2,157,336                                             | 1,415,846                                                       | 883,285                                                         | 597,714                  | 34.17               | 210,651                                                             | 213,726                  | 12.22               |
|                     | A12944        | 47,491,464                    | 35,193,886                       | 9,083,870                                             | 5,808,366                                                       | 1,967,918                                                       | 953,378                  | 54.50               | 465,116                                                             | 403,173                  | 23.05               |
|                     | A15716        | 9,770,314                     | 7,684,551                        | 2,374,589                                             | 1,639,090                                                       | 995,819                                                         | 657,661                  | 37.59               | 230,700                                                             | 233,098                  | 13.32               |
|                     | merged        | 153,782,894                   | 113,385,420                      | 31,863,327                                            | 20,457,629                                                      | 8,262,261                                                       | 1,405,078                | 80.32               | 2,004,756                                                           | 927,570                  | 53.02               |
| Bacho Kiro AA7-738  | A11198        | 41,109,419                    | 30,072,270                       | 421,964                                               | 163,706                                                         | 22,805                                                          | 21,351                   | 1.22                | 7,658                                                               | 8,277                    | 0.47                |
|                     | A12358        | 7,465,537                     | 5,674,453                        | 82,595                                                | 41,884                                                          | 15,442                                                          | 15,803                   | 0.90                | 3,618                                                               | 4,161                    | 0.24                |
|                     | A12554        | 9,618,811                     | 7,113,815                        | 98,615                                                | 46,775                                                          | 13,118                                                          | 12,786                   | 0.73                | 4,311                                                               | 4,807                    | 0.27                |
|                     | A12945        | 9,670,106                     | 7,379,698                        | 82,321                                                | 39,122                                                          | 12,981                                                          | 12,482                   | 0.71                | 4,249                                                               | 4,769                    | 0.27                |
|                     | A15717        | 6,610,421                     | 5,163,955                        | 56,111                                                | 24,879                                                          | 8,616                                                           | 8,319                    | 0.48                | 2,674                                                               | 2,969                    | 0.17                |
|                     | merged        | 74,474,294                    | 55,404,191                       | 741,606                                               | 316,366                                                         | 72,962                                                          | 67,495                   | 3.86                | 22,510                                                              | 24,423                   | 1.40                |
| Bacho Kiro BB7-240  | A11199        | 41,842,444                    | 27,505,936                       | 3,002,098                                             | 1,565,980                                                       | 456,423                                                         | 399,472                  | 22.83               | 162,041                                                             | 166,099                  | 9.49                |
|                     | A12359        | 53,142,780                    | 34,495,298                       | 3,800,991                                             | 2,200,316                                                       | 513,204                                                         | 438,452                  | 25.06               | 175,606                                                             | 177,838                  | 10.17               |
|                     | A12555        | 9,076,243                     | 5,626,312                        | 599,482                                               | 327,430                                                         | 180,668                                                         | 184,926                  | 10.57               | 61,690                                                              | 69,813                   | 3.99                |
|                     | A12946        | 45,490,577                    | 30,166,823                       | 3,125,838                                             | 1,739,697                                                       | 443,575                                                         | 385,636                  | 22.04               | 148,345                                                             | 153,108                  | 8.75                |
|                     | A15718        | 9,772,037                     | 6,950,850                        | 849,105                                               | 525,769                                                         | 258,325                                                         | 251,177                  | 14.36               | 85,290                                                              | 94,051                   | 5.38                |
|                     | merged        | 159,324,081                   | 104,745,219                      | 11,377,514                                            | 6,359,192                                                       | 1,852,195                                                       | 947,950                  | 54.19               | 632,972                                                             | 500,142                  | 28.59               |
| Bacho Kiro CC7-2289 | A11200        | 38,931,962                    | 27,905,543                       | 189,194                                               | 35,915                                                          | 8,368                                                           | 5,584                    | 0.32                | 1,302                                                               | 1,317                    | 0.08                |
|                     | A12360        | 11,622,682                    | 8,339,022                        | 54,265                                                | 15,711                                                          | 6,541                                                           | 5,653                    | 0.32                | 791                                                                 | 879                      | 0.05                |
|                     | A12556        | 9,726,180                     | 7,081,632                        | 40,292                                                | 11,277                                                          | 5,034                                                           | 3,844                    | 0.22                | 782                                                                 | 837                      | 0.05                |
|                     | A12947        | 8,434,644                     | 6,293,372                        | 32,732                                                | 7,484                                                           | 4,042                                                           | 3,055                    | 0.17                | 598                                                                 | 648                      | 0.04                |
|                     | A15719        | 8,928,831                     | 6,818,981                        | 35,113                                                | 8,607                                                           | 4,080                                                           | 3,042                    | 0.17                | 575                                                                 | 670                      | 0.04                |
|                     | merged        | 77,644,299                    | 56,438,550                       | 351,596                                               | 78,994                                                          | 28,065                                                          | 19,703                   | 1.13                | 4,048                                                               | 3,959                    | 0.27                |
| Bacho Kiro CC7-335  | A11201        | 40,556,360                    | 28,939,042                       | 4,174,229                                             | 2,149,600                                                       | 404,037                                                         | 359,352                  | 20.54               | 151,372                                                             | 154,057                  | 8.81                |
|                     | A12361        | 53,641,009                    | 38,346,940                       | 4,946,301                                             | 2,861,939                                                       | 488,498                                                         | 415,698                  | 23.76               | 176,473                                                             | 176,345                  | 10.08               |
|                     | A12557        | 8,965,066                     | 6,395,492                        | 716,845                                               | 383,083                                                         | 183,978                                                         | 183,343                  | 10.48               | 67,784                                                              | 74,719                   | 4.27                |
|                     | A12948        | 44,912,691                    | 32,003,257                       | 3,821,315                                             | 2,174,713                                                       | 352,918                                                         | 315,426                  | 18.03               | 129,552                                                             | 132,902                  | 7.60                |
|                     | A15720        | 8,640,345                     | 6,764,261                        | 911,958                                               | 564,798                                                         | 221,466                                                         | 215,586                  | 12.32               | 80,996                                                              | 87,829                   | 5.02                |
|                     | merged        | 156,715,471                   | 112,448,992                      | 14,570,648                                            | 8,134,133                                                       | 1,650,897                                                       | 907,904                  | 51.90               | 606,177                                                             | 488,615                  | 27.93               |
| Bacho Kiro BK-1653  | A11203        | 48,320,999                    | 33,985,611                       | 7,177,575                                             | 3,650,622                                                       | 1,258,608                                                       | 802,844                  | 45.89               | 200,416                                                             | 205,896                  | 11.77               |
|                     | A12363        | 61,016,010                    | 43,460,571                       | 8,599,758                                             | 5,124,135                                                       | 1,668,317                                                       | 911,485                  | 52.10               | 255,301                                                             | 252,830                  | 14.45               |
|                     | A12562        | 9,827,836                     | 6,729,266                        | 1,292,115                                             | 751,792                                                         | 453,554                                                         | 379,996                  | 21.72               | 69,030                                                              | 79,454                   | 4.54                |
|                     | A12950        | 34,594,832                    | 23,503,008                       | 4,963,426                                             | 3,109,725                                                       | 864,009                                                         | 615,238                  | 35.17               | 127,311                                                             | 136,555                  | 7.81                |
|                     | A15722        | 5,408,560                     | 4,014,769                        | 833,423                                               | 525,783                                                         | 346,867                                                         | 313,283                  | 17.91               | 50,223                                                              | 59,618                   | 3.41                |
|                     | merged        | 159,168,237                   | 111,693,225                      | 22,866,297                                            | 13,162,057                                                      | 4,591,355                                                       | 1,257,365                | 71.87               | 702,281                                                             | 533,274                  | 30.48               |
| Oase1               | A12968*       | 8,417,896                     | 5,419,859                        | 327,785                                               | 180,974                                                         | 92,404                                                          | 100,510                  | 5.75                | 19,096                                                              | 22,835                   | 1.31                |
|                     | A12967*       | 8,261,454                     | 5,467,243                        | 160,606                                               | 76,990                                                          | 48,098                                                          | 54,527                   | 3.12                | 8,238                                                               | 10,398                   | 0.59                |
|                     | A12384        | 7,386,323                     | 4,672,927                        | 306,814                                               | 176,572                                                         | 46,342                                                          | 48,541                   | 2.77                | 9,523                                                               | 10,662                   | 0.61                |
|                     | A12590        | 9,854,422                     | 6,351,106                        | 380,628                                               | 198,712                                                         | 46,847                                                          | 48,647                   | 2.78                | 10,847                                                              | 11,962                   | 0.68                |
|                     | A12955        | 9,203,696                     | 6,067,413                        | 266,099                                               | 127,307                                                         | 37,659                                                          | 39,768                   | 2.27                | 8,544                                                               | 9,632                    | 0.55                |
|                     | F9015         | 9,195,952                     | 5,789,404                        | 277,681                                               | 130,355                                                         | 35,287                                                          | 37,162                   | 2.12                | 8,199                                                               | 9,199                    | 0.53                |
|                     | merged        | 52,319,743                    | 33,767,952                       | 1,719,613                                             | 890,910                                                         | 306,637                                                         | 278,234                  | 15.9                | 64,447                                                              | 71,112                   | 4.06                |

546 \* New libraries prepared from two extracts used in a previous study (Fu et al.<sup>5</sup>)

547 **Table S2.7 Summary statistics of the merged data of Bacho Kiro and *Oase1* DNA libraries**  
548 **captured with the SNP Panels 1 and 2 comprising ~1,2 million sites (“1240k”<sup>8,15</sup>). The**  
549 **number of SNPs on target are determined using the unique fragments longer than 35 base pairs**  
550 **(L<sub>≥</sub>35 bp) with mapping quality of at least 25 (MQ<sub>≥</sub>25) that overlap “1240k” SNPs of the**  
551 **“390k”<sup>15</sup> and “840k” arrays<sup>8</sup>.**

| Specimen                   | All fragments |                               |                                  |                                                       |                                                                 |                                                                 |                          |                     | Fragments with terminal C-to-T substitutions                        |                          |                     |
|----------------------------|---------------|-------------------------------|----------------------------------|-------------------------------------------------------|-----------------------------------------------------------------|-----------------------------------------------------------------|--------------------------|---------------------|---------------------------------------------------------------------|--------------------------|---------------------|
|                            | Library ID    | Number of sequenced fragments | Number of fragments $\geq 35$ bp | Number of mapped fragments $\geq 35$ bp, MQ $\geq 25$ | Number of mapped fragments on target $\geq 35$ bp, MQ $\geq 25$ | Number of unique fragments on target $\geq 35$ bp, MQ $\geq 25$ | Number of SNPs on target | % of SNPs on target | Number of deaminated fragments on target $\geq 35$ bp, MQ $\geq 25$ | Number of SNPs on target | % of SNPs on target |
| <b>Bacho Kiro F6-620</b>   | A11197        | 34,825,937                    | 25,896,672                       | 9,784,889                                             | 7,005,396                                                       | 2,734,893                                                       | 792,855                  | 64.30               | 494,881                                                             | 371,839                  | 30.16               |
|                            | A12357        | 29,197,573                    | 21,757,163                       | 7,814,065                                             | 5,693,242                                                       | 2,574,425                                                       | 724,295                  | 58.74               | 391,571                                                             | 309,117                  | 25.07               |
|                            | A12550        | 18,259,858                    | 13,355,173                       | 4,334,612                                             | 3,164,364                                                       | 1,672,203                                                       | 738,448                  | 59.89               | 399,697                                                             | 313,922                  | 25.46               |
|                            | A12944        | 19,029,747                    | 14,243,593                       | 4,517,408                                             | 3,281,791                                                       | 1,584,618                                                       | 718,626                  | 58.28               | 374,990                                                             | 298,154                  | 24.18               |
|                            | A15716        | 10,493,214                    | 8,374,852                        | 3,234,882                                             | 2,303,292                                                       | 1,378,233                                                       | 676,799                  | 54.89               | 321,233                                                             | 264,651                  | 21.46               |
|                            | merged        | 111,806,329                   | 83,627,453                       | 29,685,856                                            | 21,448,085                                                      | 9,944,372                                                       | 1,129,285                | 91.59               | 1,982,372                                                           | 855,977                  | 69.42               |
| <b>Bacho Kiro AA7-738</b>  | A11198        | 35,590,868                    | 25,853,578                       | 486,127                                               | 308,044                                                         | 23,880                                                          | 18,975                   | 1.54                | 7,467                                                               | 7,483                    | 0.61                |
|                            | A12358        | 9,168,180                     | 6,802,065                        | 169,613                                               | 112,333                                                         | 22,611                                                          | 21,863                   | 1.77                | 6,043                                                               | 6,070                    | 0.49                |
|                            | A12554        | 12,871,406                    | 9,385,139                        | 163,336                                               | 100,989                                                         | 16,774                                                          | 16,148                   | 1.31                | 6,070                                                               | 6,088                    | 0.49                |
|                            | A12945        | 12,639,856                    | 9,507,136                        | 148,428                                               | 91,214                                                          | 17,504                                                          | 16,783                   | 1.36                | 6,436                                                               | 6,416                    | 0.52                |
|                            | A15717        | 36,305,794                    | 17,303,170                       | 402,509                                               | 305,738                                                         | 12,444                                                          | 11,569                   | 0.94                | 4,268                                                               | 4,218                    | 0.34                |
|                            | merged        | 106,576,104                   | 68,851,088                       | 1,370,013                                             | 918,318                                                         | 93,213                                                          | 84,856                   | 6.88                | 30,284                                                              | 31,219                   | 2.53                |
| <b>Bacho Kiro BB7-240</b>  | A11199        | 37,087,548                    | 25,601,623                       | 5,502,148                                             | 3,730,345                                                       | 644,850                                                         | 379,762                  | 30.80               | 180,486                                                             | 164,379                  | 13.33               |
|                            | A12359        | 31,566,711                    | 21,129,409                       | 3,886,347                                             | 2,706,321                                                       | 589,028                                                         | 317,485                  | 25.75               | 138,820                                                             | 129,353                  | 10.49               |
|                            | A12555        | 20,565,038                    | 13,219,973                       | 1,897,301                                             | 1,271,913                                                       | 407,180                                                         | 322,662                  | 26.17               | 139,666                                                             | 130,265                  | 10.56               |
|                            | A12946        | 21,483,605                    | 14,860,455                       | 2,385,989                                             | 1,651,395                                                       | 481,710                                                         | 364,296                  | 29.55               | 162,385                                                             | 148,909                  | 12.08               |
|                            | A15718        | 10,020,844                    | 7,419,594                        | 1,572,877                                             | 1,067,462                                                       | 414,636                                                         | 325,394                  | 26.39               | 137,117                                                             | 128,007                  | 10.38               |
|                            | merged        | 120,723,746                   | 82,231,054                       | 15,244,662                                            | 10,427,436                                                      | 2,537,404                                                       | 924,367                  | 74.97               | 758,474                                                             | 557,717                  | 45.23               |
| <b>Bacho Kiro CC7-2289</b> | A11200        | 31,179,013                    | 22,258,193                       | 75,228                                                | 36,521                                                          | 6,908                                                           | 4,511                    | 0.37                | 1,103                                                               | 1,127                    | 0.09                |
|                            | A12360        | 10,929,510                    | 7,736,925                        | 39,578                                                | 22,160                                                          | 6,954                                                           | 7,031                    | 0.57                | 1,052                                                               | 1,088                    | 0.09                |
|                            | A12556        | 11,492,889                    | 8,234,746                        | 31,231                                                | 15,992                                                          | 4,965                                                           | 4,943                    | 0.40                | 996                                                                 | 1,002                    | 0.08                |
|                            | A12947        | 9,986,063                     | 7,350,723                        | 24,106                                                | 11,915                                                          | 4,363                                                           | 4,381                    | 0.36                | 900                                                                 | 920                      | 0.07                |
|                            | A15719        | 12,027,896                    | 9,105,765                        | 32,422                                                | 17,034                                                          | 4,615                                                           | 4,400                    | 0.36                | 905                                                                 | 914                      | 0.07                |
|                            | merged        | 75,615,371                    | 54,686,352                       | 202,565                                               | 103,622                                                         | 27,805                                                          | 27,094                   | 2.20                | 4,956                                                               | 5,609                    | 0.45                |
| <b>Bacho Kiro CC7-335</b>  | A11201        | 33,311,280                    | 24,714,892                       | 5,964,931                                             | 3,932,017                                                       | 465,307                                                         | 316,935                  | 25.70               | 149,782                                                             | 138,732                  | 11.25               |
|                            | A12361        | 29,395,639                    | 21,423,625                       | 4,140,386                                             | 2,791,855                                                       | 479,330                                                         | 288,770                  | 23.42               | 129,872                                                             | 121,116                  | 9.82                |
|                            | A12557        | 20,686,128                    | 14,890,390                       | 2,155,639                                             | 1,421,108                                                       | 364,549                                                         | 292,309                  | 23.71               | 135,931                                                             | 126,095                  | 10.23               |
|                            | A12948        | 21,328,124                    | 15,643,260                       | 2,598,472                                             | 1,748,502                                                       | 348,854                                                         | 281,960                  | 22.87               | 130,234                                                             | 121,219                  | 9.83                |
|                            | A15720        | 10,407,288                    | 8,321,215                        | 1,786,645                                             | 1,196,498                                                       | 334,551                                                         | 273,373                  | 22.17               | 122,406                                                             | 114,735                  | 9.31                |
|                            | merged        | 115,128,459                   | 84,993,382                       | 16,646,073                                            | 11,089,980                                                      | 1,992,591                                                       | 854,541                  | 69.31               | 668,225                                                             | 504,262                  | 40.90               |
| <b>Bacho Kiro BK-1653</b>  | A11203        | 31,611,263                    | 23,452,810                       | 7,400,872                                             | 4,955,232                                                       | 1,574,839                                                       | 644,227                  | 52.25               | 188,629                                                             | 171,442                  | 13.90               |
|                            | A12363        | 30,529,019                    | 22,310,950                       | 5,876,676                                             | 4,032,969                                                       | 1,629,916                                                       | 585,937                  | 47.52               | 159,277                                                             | 146,519                  | 11.88               |
|                            | A12562        | 20,926,241                    | 14,800,165                       | 3,715,610                                             | 2,581,475                                                       | 1,039,486                                                       | 592,899                  | 48.09               | 158,742                                                             | 146,159                  | 11.85               |
|                            | A12950        | 20,558,862                    | 14,605,842                       | 3,625,387                                             | 2,533,013                                                       | 996,740                                                         | 576,910                  | 46.79               | 148,692                                                             | 137,858                  | 11.18               |
|                            | A15722        | 31,694,836                    | 16,470,059                       | 7,508,034                                             | 5,902,569                                                       | 1,098,165                                                       | 620,721                  | 50.34               | 158,615                                                             | 147,452                  | 11.96               |
|                            | merged        | 135,320,221                   | 91,639,826                       | 28,126,579                                            | 20,005,258                                                      | 6,339,146                                                       | 1,062,658                | 86.13               | 813,955                                                             | 577,031                  | 46.80               |
| <b>Oase1</b>               | A12968*       | 18,310,229                    | 12,226,533                       | 883,648                                               | 579,817                                                         | 230,378                                                         | 201,331                  | 16.33               | 49,345                                                              | 48,955                   | 3.97                |
|                            | A12967*       | 17,191,082                    | 11,647,238                       | 400,609                                               | 264,188                                                         | 112,986                                                         | 107,796                  | 8.74                | 20,594                                                              | 21,029                   | 1.71                |
|                            | A12384        | 17,579,948                    | 11,275,842                       | 948,711                                               | 654,060                                                         | 69,694                                                          | 66,541                   | 5.40                | 15,525                                                              | 15,625                   | 1.27                |
|                            | A12590        | 21,813,393                    | 14,214,612                       | 1,047,462                                             | 701,004                                                         | 66,203                                                          | 63,330                   | 5.14                | 16,368                                                              | 16,399                   | 1.33                |
|                            | A12955        | 19,148,461                    | 12,500,236                       | 669,842                                               | 437,921                                                         | 59,770                                                          | 57,511                   | 4.66                | 14,455                                                              | 14,596                   | 1.18                |
|                            | F9015         | 21,804,293                    | 13,452,555                       | 928,397                                               | 613,026                                                         | 52,163                                                          | 50,564                   | 4.10                | 12,978                                                              | 13,088                   | 1.06                |
|                            | merged        | 115,847,406                   | 75,317,016                       | 4,878,669                                             | 3,250,016                                                       | 591,194                                                         | 429,569                  | 34.84               | 129,265                                                             | 121,388                  | 9.84                |

552 \* New libraries prepared from two extracts used in a previous study (Fu et al.<sup>8</sup>)

553 **Table S2.8 Summary statistics of the merged data of Bacho Kiro and *Oase1* DNA libraries**  
554 **captured with the SNP Panels 1, 2 and 3 comprising 2.2 million sites (“2200k”<sup>8,15</sup>).** Results  
555 per library detailed in the table. The number of SNPs on target are determined using the unique  
556 fragments longer than 35 base pairs ( $L \geq 35$  bp) with mapping quality of at least 25 ( $MQ \geq 25$ )  
557 and that overlap  $\sim 2.2$  million SNPs of the “390k”<sup>15</sup>, “840k”<sup>8</sup> and “1000k” arrays<sup>8</sup>.

| Specimen            | All fragments |                               |                                  |                                                       |                                                                 |                                                                 |                          |                     | Fragments with terminal C-to-T substitutions                        |                          |                     |
|---------------------|---------------|-------------------------------|----------------------------------|-------------------------------------------------------|-----------------------------------------------------------------|-----------------------------------------------------------------|--------------------------|---------------------|---------------------------------------------------------------------|--------------------------|---------------------|
|                     | Library ID    | Number of sequenced fragments | Number of fragments $\geq 35$ bp | Number of mapped fragments $\geq 35$ bp, $MQ \geq 25$ | Number of mapped fragments on target $\geq 35$ bp, $MQ \geq 25$ | Number of unique fragments on target $\geq 35$ bp, $MQ \geq 25$ | Number of SNPs on target | % of SNPs on target | Number of deaminated fragments on target $\geq 35$ bp, $MQ \geq 25$ | Number of SNPs on target | % of SNPs on target |
| Bacho Kiro F6-620   | A11197        | 56,817,171                    | 42,739,090                       | 15,936,366                                            | 11,244,167                                                      | 4,115,646                                                       | 1,504,437                | 70.15               | 1,058,735                                                           | 764,952                  | 35.67               |
|                     | A12357        | 46,412,901                    | 34,943,528                       | 12,776,135                                            | 9,297,117                                                       | 3,915,997                                                       | 1,447,043                | 67.48               | 945,338                                                             | 698,557                  | 32.57               |
|                     | A12550        | 29,523,451                    | 21,651,782                       | 7,079,392                                             | 5,086,346                                                       | 2,557,164                                                       | 1,184,154                | 55.22               | 605,245                                                             | 494,054                  | 23.04               |
|                     | A12944        | 27,592,961                    | 20,684,874                       | 6,550,313                                             | 4,721,438                                                       | 2,285,148                                                       | 1,107,439                | 51.64               | 535,144                                                             | 444,966                  | 20.75               |
|                     | A15716        | 21,068,663                    | 16,897,935                       | 6,573,652                                             | 4,739,589                                                       | 2,148,695                                                       | 1,110,491                | 51.78               | 494,820                                                             | 424,879                  | 19.81               |
|                     | merged        | 181,415,147                   | 136,917,209                      | 48,915,858                                            | 35,088,657                                                      | 15,022,650                                                      | 1,867,749                | 87.09               | 3,639,282                                                           | 1,362,667                | 64.54               |
| Bacho Kiro AA7-738  | A11198        | 58,681,066                    | 43,053,237                       | 739,703                                               | 450,345                                                         | 34,952                                                          | 33,992                   | 1.59                | 13,082                                                              | 13,288                   | 0.62                |
|                     | A12358        | 16,676,690                    | 12,484,437                       | 289,033                                               | 191,569                                                         | 33,009                                                          | 32,780                   | 1.53                | 8,706                                                               | 8,920                    | 0.42                |
|                     | A12554        | 22,643,136                    | 16,654,000                       | 294,471                                               | 178,049                                                         | 23,439                                                          | 23,170                   | 1.08                | 8,400                                                               | 8,657                    | 0.40                |
|                     | A12945        | 22,056,042                    | 16,732,805                       | 254,593                                               | 153,785                                                         | 24,590                                                          | 24,275                   | 1.13                | 9,027                                                               | 9,261                    | 0.43                |
|                     | A15717        | 48,070,409                    | 22,022,511                       | 470,195                                               | 354,291                                                         | 15,203                                                          | 14,665                   | 0.68                | 5,160                                                               | 5,256                    | 0.25                |
|                     | merged        | 168,127,343                   | 110,946,990                      | 2,047,995                                             | 1,328,039                                                       | 131,193                                                         | 123,265                  | 5.75                | 44,375                                                              | 44,610                   | 2.08                |
| Bacho Kiro BB7-240  | A11199        | 62,282,800                    | 43,076,677                       | 8,625,924                                             | 5,748,173                                                       | 943,806                                                         | 710,330                  | 33.12               | 336,713                                                             | 309,131                  | 14.42               |
|                     | A12359        | 52,263,445                    | 35,252,377                       | 6,420,632                                             | 4,419,909                                                       | 861,912                                                         | 661,758                  | 30.86               | 296,216                                                             | 275,364                  | 12.84               |
|                     | A12555        | 30,703,077                    | 19,714,046                       | 2,776,142                                             | 1,822,904                                                       | 578,138                                                         | 478,374                  | 22.31               | 196,214                                                             | 189,300                  | 8.83                |
|                     | A12946        | 32,007,473                    | 22,072,415                       | 3,446,475                                             | 2,351,070                                                       | 685,063                                                         | 542,274                  | 25.29               | 228,867                                                             | 217,287                  | 10.13               |
|                     | A15718        | 18,857,516                    | 13,959,798                       | 2,966,341                                             | 2,035,310                                                       | 593,947                                                         | 488,639                  | 22.79               | 194,726                                                             | 188,221                  | 8.78                |
|                     | merged        | 196,114,311                   | 134,075,313                      | 24,235,514                                            | 16,377,366                                                      | 3,662,866                                                       | 1,451,175                | 67.67               | 1,252,736                                                           | 840,421                  | 39.19               |
| Bacho Kiro CC7-2289 | A11200        | 52,653,555                    | 37,943,882                       | 132,979                                               | 55,859                                                          | 9,826                                                           | 9,941                    | 0.46                | 2,377                                                               | 2,482                    | 0.12                |
|                     | A12360        | 18,733,502                    | 13,430,985                       | 70,741                                                | 37,338                                                          | 8,930                                                           | 9,341                    | 0.44                | 1,322                                                               | 1,405                    | 0.07                |
|                     | A12556        | 20,392,805                    | 14,728,695                       | 59,180                                                | 27,596                                                          | 6,592                                                           | 6,789                    | 0.32                | 1,346                                                               | 1,404                    | 0.07                |
|                     | A12947        | 18,167,388                    | 13,475,445                       | 46,543                                                | 20,229                                                          | 5,832                                                           | 6,057                    | 0.28                | 1,171                                                               | 1,236                    | 0.06                |
|                     | A15719        | 20,612,547                    | 15,740,666                       | 60,670                                                | 28,575                                                          | 6,058                                                           | 6,030                    | 0.28                | 1,156                                                               | 1,197                    | 0.06                |
|                     | merged        | 130,559,797                   | 95,319,673                       | 370,113                                               | 169,597                                                         | 37,238                                                          | 37,590                   | 1.75                | 7,372                                                               | 7,696                    | 0.36                |
| Bacho Kiro CC7-335  | A11201        | 55,301,835                    | 41,173,364                       | 9,565,269                                             | 6,206,717                                                       | 702,397                                                         | 569,300                  | 26.55               | 264,767                                                             | 248,606                  | 11.59               |
|                     | A12361        | 49,895,859                    | 36,673,473                       | 7,367,752                                             | 4,939,653                                                       | 722,934                                                         | 573,966                  | 26.76               | 261,318                                                             | 244,569                  | 11.40               |
|                     | A12557        | 30,509,418                    | 21,993,264                       | 3,170,647                                             | 2,035,590                                                       | 529,901                                                         | 440,993                  | 20.56               | 196,211                                                             | 187,753                  | 8.76                |
|                     | A12948        | 32,453,892                    | 23,784,249                       | 3,945,576                                             | 2,616,487                                                       | 512,068                                                         | 428,364                  | 19.97               | 189,611                                                             | 181,578                  | 8.47                |
|                     | A15720        | 19,432,194                    | 15,590,987                       | 3,504,402                                             | 2,382,864                                                       | 500,486                                                         | 423,567                  | 19.75               | 181,570                                                             | 175,325                  | 8.18                |
|                     | merged        | 187,593,198                   | 139,215,337                      | 27,553,646                                            | 18,181,311                                                      | 2,967,786                                                       | 1,353,413                | 63.11               | 1,093,477                                                           | 776,283                  | 36.20               |
| Bacho Kiro BK-1653  | A11203        | 54,170,261                    | 40,183,676                       | 12,422,963                                            | 8,226,929                                                       | 2,352,606                                                       | 1,223,725                | 57.06               | 377,170                                                             | 344,695                  | 16.07               |
|                     | A12363        | 49,766,354                    | 36,620,024                       | 9,948,926                                             | 6,813,993                                                       | 2,402,877                                                       | 1,191,416                | 55.56               | 369,224                                                             | 335,185                  | 15.63               |
|                     | A12562        | 32,337,191                    | 22,878,291                       | 5,634,204                                             | 3,836,270                                                       | 1,523,656                                                       | 916,582                  | 42.74               | 230,660                                                             | 220,383                  | 10.28               |
|                     | A12950        | 30,217,360                    | 21,445,227                       | 5,355,935                                             | 3,707,402                                                       | 1,425,078                                                       | 876,042                  | 40.85               | 210,684                                                             | 202,809                  | 9.46                |
|                     | A15722        | 41,216,350                    | 20,511,006                       | 9,294,451                                             | 7,279,052                                                       | 1,393,895                                                       | 868,204                  | 40.49               | 199,595                                                             | 193,841                  | 9.04                |
|                     | merged        | 207,707,516                   | 141,638,224                      | 42,656,479                                            | 29,863,646                                                      | 9,098,112                                                       | 1,728,159                | 80.59               | 1,387,333                                                           | 874,287                  | 40.77               |
| Oase1               | A12968*       | 28,223,311                    | 18,752,585                       | 1,343,789                                             | 870,557                                                         | 326,422                                                         | 296,458                  | 13.82               | 68,880                                                              | 70,514                   | 3.29                |
|                     | A12967*       | 26,572,354                    | 17,978,003                       | 611,051                                               | 394,828                                                         | 157,704                                                         | 156,272                  | 7.29                | 28,229                                                              | 29,716                   | 1.39                |
|                     | A12384        | 26,906,689                    | 17,318,241                       | 1,409,840                                             | 954,614                                                         | 104,016                                                         | 102,077                  | 4.76                | 22,677                                                              | 23,361                   | 1.09                |
|                     | A12590        | 32,239,343                    | 20,968,522                       | 1,530,134                                             | 1,010,243                                                       | 96,272                                                          | 94,498                   | 4.41                | 23,320                                                              | 23,929                   | 1.12                |
|                     | A12955        | 29,352,737                    | 19,185,421                       | 1,028,770                                             | 655,370                                                         | 88,281                                                          | 87,220                   | 4.07                | 20,853                                                              | 21,525                   | 1.00                |
|                     | F9015         | 31,901,491                    | 19,700,827                       | 1,302,320                                             | 836,823                                                         | 77,891                                                          | 77,405                   | 3.61                | 19,184                                                              | 19,785                   | 0.92                |
|                     | merged        | 175,195,925                   | 113,903,599                      | 7,225,904                                             | 4,722,435                                                       | 850,586                                                         | 646,646                  | 30.15               | 183,143                                                             | 177,336                  | 8.27                |

558 \* New libraries prepared from two extracts used in a previous study (*Fu et al.*<sup>9</sup>)

559 **Table S2.9 Summary statistics of the Bacho Kiro libraries enriched for ~6.9 Mb of the Y**  
560 **chromosome<sup>16</sup>.** The coverage on target is determined using the unique fragments longer than  
561 35 base pairs ( $L \geq 35$  bp) with mapping quality of at least 25 ( $MQ \geq 25$ ) and that overlap the  
562 target regions.

| Specimen                  | All fragments |                               |                                  |                                                       |                                                                 |                                                                 |                    | Fragments with terminal C-to-T substitutions                        |                    |
|---------------------------|---------------|-------------------------------|----------------------------------|-------------------------------------------------------|-----------------------------------------------------------------|-----------------------------------------------------------------|--------------------|---------------------------------------------------------------------|--------------------|
|                           | Library ID    | Number of sequenced fragments | Number of fragments $\geq 35$ bp | Number of mapped fragments $\geq 35$ bp, $MQ \geq 25$ | Number of mapped fragments on target $\geq 35$ bp, $MQ \geq 25$ | Number of unique fragments on target $\geq 35$ bp, $MQ \geq 25$ | Coverage on target | Number of deaminated fragments on target $\geq 35$ bp, $MQ \geq 25$ | Coverage on target |
| <b>Bacho Kiro F6-620</b>  | A11197        | 6,649,928                     | 5,127,264                        | 2,500,217                                             | 2,036,336                                                       | 308,614                                                         | 2.75               | 78,144                                                              | 0.68               |
|                           | A12357        | 5,746,174                     | 4,429,045                        | 2,277,437                                             | 1,869,731                                                       | 350,547                                                         | 3.23               | 83,205                                                              | 0.74               |
|                           | A12550        | 6,429,418                     | 5,015,419                        | 2,569,376                                             | 2,090,273                                                       | 361,743                                                         | 3.34               | 84,186                                                              | 0.75               |
|                           | A12944        | 5,272,554                     | 3,962,253                        | 1,868,796                                             | 1,504,334                                                       | 316,018                                                         | 2.86               | 73,418                                                              | 0.64               |
|                           | A15716        | 7,000,727                     | 5,682,409                        | 2,790,390                                             | 2,254,962                                                       | 328,009                                                         | 3.02               | 75,048                                                              | 0.67               |
|                           | <b>merged</b> | <b>31,098,801</b>             | <b>24,216,390</b>                | <b>12,006,216</b>                                     | <b>9,755,636</b>                                                | <b>1,664,931</b>                                                | <b>15.20</b>       | <b>394,001</b>                                                      | <b>3.48</b>        |
| <b>Bacho Kiro BB7-240</b> | A11199        | 6,602,187                     | 4,757,307                        | 1,896,804                                             | 1,577,430                                                       | 57,527                                                          | 0.44               | 19,984                                                              | 0.15               |
|                           | A12359        | 6,987,822                     | 5,099,681                        | 2,168,018                                             | 1,813,504                                                       | 58,667                                                          | 0.45               | 19,984                                                              | 0.15               |
|                           | A12555        | 8,244,030                     | 5,797,923                        | 2,447,936                                             | 2,042,714                                                       | 63,411                                                          | 0.49               | 21,114                                                              | 0.16               |
|                           | A12946        | 6,516,377                     | 4,719,122                        | 1,843,243                                             | 1,506,249                                                       | 70,092                                                          | 0.55               | 22,889                                                              | 0.18               |
|                           | A15718        | 6,816,864                     | 5,315,156                        | 1,923,820                                             | 1,585,029                                                       | 65,126                                                          | 0.52               | 21,059                                                              | 0.16               |
|                           | <b>merged</b> | <b>35,167,280</b>             | <b>25,689,189</b>                | <b>10,279,821</b>                                     | <b>8,524,926</b>                                                | <b>314,823</b>                                                  | <b>2.46</b>        | <b>105,030</b>                                                      | <b>0.80</b>        |
| <b>Bacho Kiro CC7-335</b> | A11201        | 5,892,475                     | 4,509,883                        | 1,889,636                                             | 1,558,502                                                       | 35,318                                                          | 0.26               | 13,064                                                              | 0.10               |
|                           | A12361        | 6,960,643                     | 5,403,081                        | 2,256,934                                             | 1,878,258                                                       | 42,808                                                          | 0.32               | 15,162                                                              | 0.11               |
|                           | A12557        | 10,484,235                    | 7,808,450                        | 3,181,164                                             | 2,638,950                                                       | 46,134                                                          | 0.34               | 16,888                                                              | 0.12               |
|                           | A12948        | 7,246,254                     | 5,614,926                        | 2,143,855                                             | 1,759,374                                                       | 39,615                                                          | 0.30               | 14,272                                                              | 0.11               |
|                           | A15720        | 7,224,312                     | 5,900,108                        | 2,279,432                                             | 1,882,344                                                       | 39,383                                                          | 0.30               | 13,894                                                              | 0.10               |
|                           | <b>merged</b> | <b>37,807,919</b>             | <b>29,236,448</b>                | <b>11,751,021</b>                                     | <b>9,717,428</b>                                                | <b>203,258</b>                                                  | <b>1.52</b>        | <b>73,280</b>                                                       | <b>0.54</b>        |

563

**Table S2.10 Contamination estimates for Bacho Kiro Cave and *Oase 1* specimens.**

| Specimen                   | Mitochondrial DNA contamination estimates |                                  | Sex-based contamination estimates for male individuals (ANGSD) <sup>24</sup><br>>200 SNPs covered |                              | AuthentiCT <sup>27</sup> contamination estimates |
|----------------------------|-------------------------------------------|----------------------------------|---------------------------------------------------------------------------------------------------|------------------------------|--------------------------------------------------|
|                            | all fragments<br>[95% CI]                 | deaminated fragments<br>[95% CI] | all fragments<br>[SE]                                                                             | deaminated fragments<br>[SE] | all fragments<br>[SE]                            |
| <b>Bacho Kiro F6-620</b>   | 0.19 [0.08-0.44]                          | 0.12 [0.02-0.65]                 | 1.62 [0.12]                                                                                       | 1.09 [0.40]                  | 2.38 [0.54]                                      |
| <b>Bacho Kiro AA7-738</b>  | 0.75 [0.21-2.70]                          | 1.59 [0.28-8.46]                 | -                                                                                                 | -                            | 11.05 [0.36]                                     |
| <b>Bacho Kiro BB7-240</b>  | 2.91 [2.21-3.83]                          | 0.43 [0.15-1.26]                 | 2.75 [0.37]                                                                                       | 1.27 [1.03]                  | 4.72 [0.42]                                      |
| <b>Bacho Kiro CC7-2289</b> | 1.00 [0-2.00]                             | 0 [0-0.05]                       | -                                                                                                 | -                            | 42.36 [0.64]                                     |
| <b>Bacho Kiro CC7-335</b>  | 0.42 [0.21-0.83]                          | 0 [0-0.49]                       | 3.41 [0.53]                                                                                       | 2.13 [1.24]                  | 4.46 [0.31]                                      |
| <b>Bacho Kiro BK-1653</b>  | 1.63 [1.19-2.22]                          | 1.14 [0.39-3.30]                 | -                                                                                                 | -                            | 3.53 [0.71]                                      |
| <b>Oase1 new extract</b>   | 46.22 [40.50-52.39]                       | 4.51 [0-9.34]                    |                                                                                                   |                              | 23.62 [0.44]                                     |
| <b>Oase1 old extracts</b>  | 68.13 [62.48-73.29]                       | 9.04 [2.83-15.25]                | 21.74 [4.56]                                                                                      | -                            | 28.98 [0.48]                                     |

\*SE – standard error

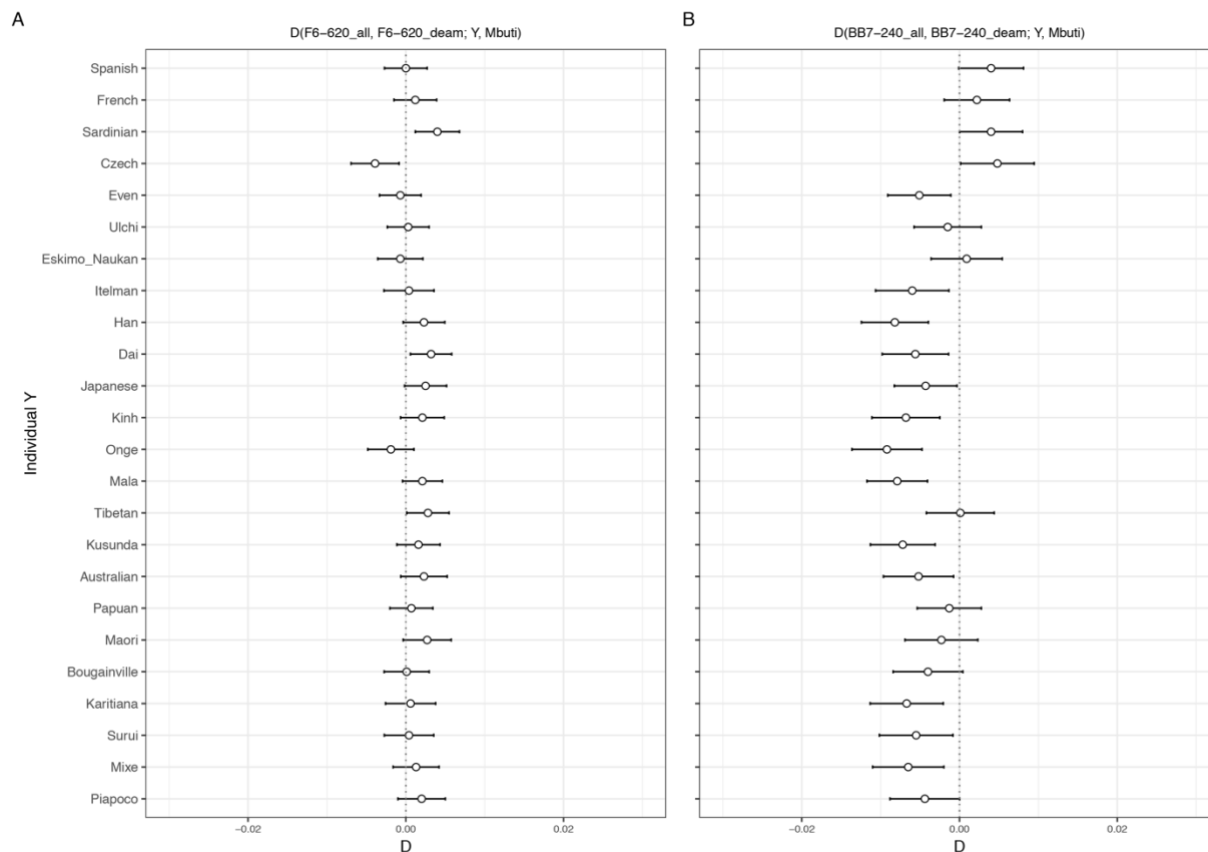

567  
 568 **Figure S2.1 Statistics of the form  $D(\text{Bacho Kiro}_1 \text{ all fragments, Bacho Kiro}_1 \text{ deaminated}$**   
 569 ***fragments; Test, Mbuti*) comparing derived allele sharing between all fragments and**  
 570 **deaminated fragments only from a given specimen with a present-day human population**  
 571 **from SGDP<sup>29</sup>. A) Bacho Kiro *F6-620* and B) Bacho Kiro *BB7-240*. Points plotted on the  $x$ -**  
 572 **axes correspond to the calculated  $D$ -values using ADMIXTOOLS<sup>27</sup> and as implemented in R-**  
 573 **package *admixr*<sup>28</sup>. Open circles indicate a non-significant Z-score, or  $|Z| < 3$ . Whiskers**  
 574 **correspond to one standard error (SE) calculated using a Weighted Block Jackknife<sup>27,30</sup> and a**  
 575 **block size of 5 Mb across all autosomes of “2200k” SNP Panel<sup>8,15</sup> covered by both all and**  
 576 **deaminated DNA fragments of Bacho Kiro *F6-620* (panel A,  $n(\text{SNPs}) = 1,286,485$ ) and Bacho**  
 577 **Kiro *BB7-240* (panel B,  $n(\text{SNPs}) = 785,445$ ). Three Mbuti individuals from SGDP<sup>29</sup> were used**  
 578 **as outgroup.**

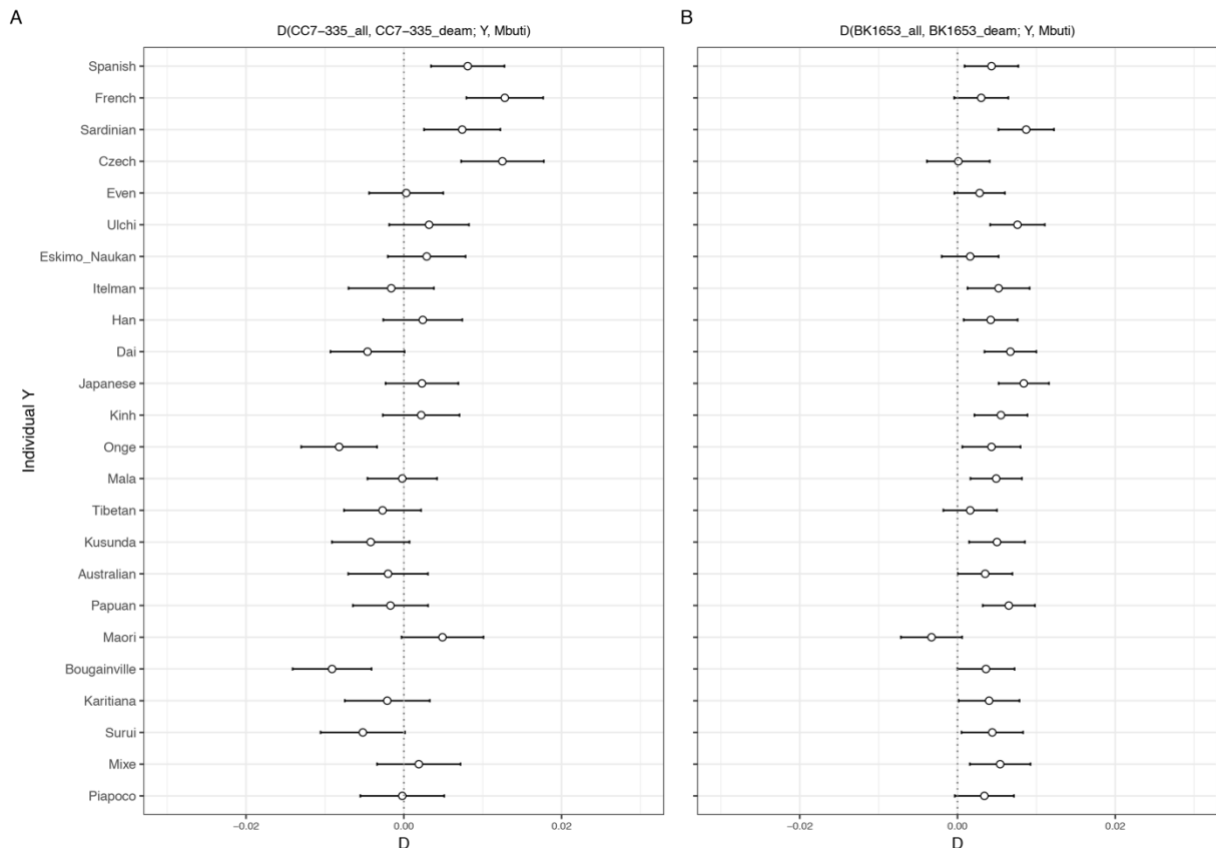

579  
 580 **Figure S2.2 Statistics of the form  $D(\text{Bacho Kiro}_1 \text{ all fragments, Bacho Kiro}_1 \text{ deaminated}$**   
 581 ***fragments; Test, Mbuti*) comparing derived allele sharing between all fragments and**  
 582 **deaminated fragments only from a given specimen with a present-day human population**  
 583 **from SGDP<sup>29</sup>. A) Bacho Kiro *CC7-335* and B) Bacho Kiro *BK1653*. Points plotted on the x-**  
 584 **axes correspond to the calculated  $D$ -values using ADMIXTOOLS<sup>27</sup> and as implemented in R-**  
 585 **package *admixr*<sup>28</sup>. Open circles indicate a non-significant Z-score, or  $|Z| < 3$ . Whiskers**  
 586 **correspond to one standard error (SE) calculated using a Weighted Block Jackknife<sup>27,30</sup> and a**  
 587 **block size of 5 Mb across all autosomes of “2200k”<sup>8,15</sup> SNP Panel covered by both all and**  
 588 **deaminated DNA fragments of Bacho Kiro *CC7-335* (panel A,  $n(\text{SNPs}) = 720,319$ ) and Bacho**  
 589 **Kiro *BK1653* (panel B,  $n(\text{SNPs}) = 822,323$ ). Three Mbuti individuals from SGDP<sup>29</sup> were used**  
 590 **as outgroup.**

## 591 **Supplementary Information 3**

### 592 **Datasets for downstream analyses**

593

594 We merged the data from the newly sequenced specimens detailed in the Supplementary  
595 Information 2 with datasets of previously published ancient and present-day humans, as well  
596 as the archaics. We used three different SNP panels (“1240k”, “2240k” and “Archaic  
597 admixture”) for all downstream analyses.

598

#### 599 **Analysis panels**

##### 600 **“1240K” panel**

601 This panel consists of combined 1,233,013 SNPs from the Panel 1 detailed in *Haak et al.*  
602 (“390k”)<sup>1</sup> and the Panel 2 detailed in *Fu et al.* (“840k”)<sup>2</sup>. These data include genotypes of 2,109  
603 ancient and 2,974 present-day individuals compiled from published studies and available in the  
604 EIGENSTRAT format<sup>3</sup> through the [https://reich.hms.harvard.edu/downloadable-genotypes-  
605 present-day-and-ancient-dna-data-compiled-published-papers/](https://reich.hms.harvard.edu/downloadable-genotypes-present-day-and-ancient-dna-data-compiled-published-papers/) (version 37.2, released  
606 February 22, 2019).

607

##### 608 **“2200K” panel**

609 This panel consists of an extended panel of SNPs represented in the “1240k” together with the  
610 SNP Panel 3 detailed in *Fu et al.* (“1000k”)<sup>2</sup>, for a total of 2,144,502 SNPs across the  
611 genome<sup>2,4</sup>. These data include published genetic data of ancient modern humans obtained  
612 through hybridization captures<sup>2,4,5</sup> and a range of present-day<sup>6-8</sup> and ancient modern humans<sup>9-  
613 24</sup>, as well as the archaics<sup>7,8,25-27</sup>, for which whole-genome shotgun data of varying coverage  
614 are available. For all low-coverage individuals we randomly sampled an allele at these ~2.2  
615 million SNPs which passed the filters described in the Supplementary Information 2 (unique  
616 fragments of at least 35 bp with a mapping quality  $\geq 25$  and a base quality  $\geq 20$ ). For the high-  
617 coverage individuals we used their respective published genotypes intersecting ~2.2 million  
618 SNPs, with the exception of *Ust’Ishim*<sup>23</sup>, the *Altai Neandertal*<sup>7</sup>, the *Denisova 3* individual<sup>8</sup>,  
619 *Loschbour*<sup>19</sup> and *Stuttgart*<sup>19</sup> for which we used the genotypes re-called with snpAD<sup>28</sup>, and as  
620 described in detail in *Prüfer et al.*<sup>25</sup>.



621 **“Archaic admixture” panel**

622 “Archaic admixture” panel consists of 1,749,385 (~1.7 million) SNPs informative about the  
623 Neandertal and Denisovan ancestry in a studied individual<sup>2</sup>. These data include 21 ancient  
624 modern humans directly enriched for these sites<sup>2,4,5</sup>, as well as the genotypes of present-day<sup>6-8</sup>  
625 and ancient modern humans<sup>9-24</sup>, as well as the archaics<sup>7,8,25-27</sup>, for which whole-genome  
626 shotgun data are available and that were intersected with ~1.7 million SNPs of the “Archaic  
627 admixture” panel using *BEDTools*<sup>29</sup> (version: 2.24.0).

628

629 **References for SI3:**

- 630 1 Haak, W. *et al.* Massive migration from the steppe was a source for Indo-European  
631 languages in Europe. *Nature* **522**, 207-211, doi:10.1038/nature14317 (2015).
- 632 2 Fu, Q. *et al.* An early modern human from Romania with a recent Neanderthal ancestor.  
633 *Nature* **524**, 216-219, doi:10.1038/nature14558 (2015).
- 634 3 Patterson, N. *et al.* Ancient admixture in human history. *Genetics* **192**, 1065-1093,  
635 doi:10.1534/genetics.112.145037 (2012).
- 636 4 Fu, Q. *et al.* The genetic history of Ice Age Europe. *Nature* **534**, 200-205,  
637 doi:10.1038/nature17993 (2016).
- 638 5 Yang, M. A. *et al.* 40,000-Year-Old Individual from Asia Provides Insight into Early  
639 Population Structure in Eurasia. *Curr. Biol.* **27**, 3202-3208. e3209, doi:  
640 10.1016/j.cub.2017.09.030 (2017).
- 641 6 Mallick, S. *et al.* The Simons Genome Diversity Project: 300 genomes from 142 diverse  
642 populations. *Nature* **538**, 201-206, doi:10.1038/nature18964 (2016).
- 643 7 Prüfer, K. *et al.* The complete genome sequence of a Neanderthal from the Altai  
644 Mountains. *Nature* **505**, 43-49, doi:10.1038/nature12886 (2014).
- 645 8 Meyer, M. *et al.* A high-coverage genome sequence from an archaic Denisovan  
646 individual. *Science* **338**, 222-226, doi:10.1126/science.1224344 (2012).
- 647 9 Seguin-Orlando, A. *et al.* Genomic structure in Europeans dating back at least 36,200  
648 years. *Science* **346**, 1113-1118, doi:10.1126/science.aaa0114 (2014).
- 649 10 Raghavan, M. *et al.* Upper Palaeolithic Siberian genome reveals dual ancestry of Native  
650 Americans. *Nature* **505**, 87-91, doi:10.1038/nature12736 (2014).
- 651 11 Rasmussen, M. *et al.* Ancient human genome sequence of an extinct Palaeo-Eskimo.  
652 *Nature* **463**, 757-762, doi:10.1038/nature08835 (2010).
- 653 12 Rasmussen, M. *et al.* The genome of a Late Pleistocene human from a Clovis burial  
654 site in western Montana. *Nature* **506**, 225-229, doi:10.1038/nature13025 (2014).

- 655 13 Rasmussen, M. *et al.* The ancestry and affiliations of Kennewick Man. *Nature* **523**,  
656 455-458, doi:10.1038/nature14625 (2015).
- 657 14 Sikora, M. *et al.* Ancient genomes show social and reproductive behavior of early  
658 Upper Paleolithic foragers. *Science* **358**, 659-662, doi: 10.1126/science.aao1807  
659 (2017).
- 660 15 Sikora, M. *et al.* The population history of northeastern Siberia since the Pleistocene.  
661 *Nature* **570**, 182-188, doi: 10.1038/s41586-019-1279-z (2019).
- 662 16 Olalde, I. *et al.* Derived immune and ancestral pigmentation alleles in a 7,000-year-old  
663 Mesolithic European. *Nature* **507**, 225-228, doi:10.1038/nature12960 (2014).
- 664 17 Gallego Llorente, M. *et al.* Ancient Ethiopian genome reveals extensive Eurasian  
665 admixture throughout the African continent. *Science* **350**, 820-822,  
666 doi:10.1126/science.aad2879 (2015).
- 667 18 Keller, A. *et al.* New insights into the Tyrolean Iceman's origin and phenotype as  
668 inferred by whole-genome sequencing. *Nat. Commun.* **3**, 698,  
669 doi:10.1038/ncomms1701 (2012).
- 670 19 Lazaridis, I. *et al.* Ancient human genomes suggest three ancestral populations for  
671 present-day Europeans. *Nature* **513**, 409-413, doi:10.1038/nature13673 (2014).
- 672 20 Gamba, C. *et al.* Genome flux and stasis in a five millennium transect of European  
673 prehistory. *Nat. Commun.* **5**, 5257, doi:10.1038/ncomms6257 (2014).
- 674 21 Moreno-Mayar, J. V. *et al.* Terminal Pleistocene Alaskan genome reveals first founding  
675 population of Native Americans. *Nature* **553**, 203-207, doi: 10.1038/nature25173  
676 (2018).
- 677 22 Moreno-Mayar, J. V. *et al.* Early human dispersals within the Americas. *Science* **362**,  
678 eaav2621, doi:10.1126/science.aav2621 (2018).
- 679 23 Fu, Q. *et al.* Genome sequence of a 45,000-year-old modern human from western  
680 Siberia. *Nature* **514**, 445-449, doi:10.1038/nature13810 (2014).
- 681 24 Jones, E. R. *et al.* Upper Palaeolithic genomes reveal deep roots of modern Eurasians.  
682 *Nat. Commun.* **6**, 8912, doi:10.1038/ncomms9912 (2015).
- 683 25 Prüfer, K. *et al.* A high-coverage Neandertal genome from Vindija Cave in Croatia.  
684 *Science* **358**, 655-658, doi: 10.1126/science.aao1887 (2017).
- 685 26 Hajdinjak, M. *et al.* Reconstructing the genetic history of late Neanderthals. *Nature*  
686 **555**, 652-656, doi:10.1038/nature26151 (2018).
- 687 27 Mafessoni, F. *et al.* A high-coverage Neandertal genome from Chagyrskaya Cave.  
688 *Proc. Natl. Acad. Sci. U.S.A.* **117**, 15132-15136, doi:10.1073/pnas.2004944117 (2020).

- 689 28 Prüfer, K. snpAD: An ancient DNA genotype caller. *Bioinformatics* **34**, 4165-4171,  
690 doi: 10.1093/bioinformatics/bty507 (2018).
- 691 29 Quinlan, A. R. & Hall, I. M. BEDTools: a flexible suite of utilities for comparing  
692 genomic features. *Bioinformatics* **26**, 841-842, doi: 10.1093/bioinformatics/btq033  
693 (2010).

## 694 **Supplementary Information 4**

### 695 **Relatedness, sex determination and Y chromosome analyses**

696

#### 697 **Relatedness between different specimens**

698 Given the fragmentary nature of human specimens recovered from Bacho Kiro Cave and our  
699 previous results demonstrating that the molar (specimen *F6-620*) and one of the fragments  
700 (specimen *AA7-738*) have an identical mtDNA sequence<sup>1</sup>, we sought to determine the degree  
701 of relationship among IUP Bacho Kiro Cave specimens.

702 To assess whether specimens *F6-620* and *AA7-738* might come from the same  
703 individual, we used a similar approach as described in *Mitnik et al.*<sup>2</sup>. To obtain a baseline of  
704 what could be expected for specimens stemming from the same individual, we first calculated  
705 a pairwise mismatch rate between different libraries stemming from the same specimen using  
706 random allele calls of the autosomal data from the “2200k” SNP panel (Supplementary  
707 Information 3). The median value of the pairwise mismatch rate between different libraries  
708 originating from the same extract is 0.125 (interquartile range: 0.118-0.135) (Tab. S4.1 and  
709 Extended Data Fig. 2B). To obtain values of what is expected for unrelated individuals, we  
710 then calculated a pairwise mismatch rate among a range of ancient modern humans from  
711 previously published studies using random allele calls of “2200k” SNP panel (Supplementary  
712 Information 3). Median value of a pairwise mismatch rate between unrelated ancient  
713 individuals is 0.241 (interquartile range: 0.228-0.255) (Extended Data Fig. 2B).

714 When calculating a pairwise mismatch rate between Bacho Kiro Cave specimens, we  
715 find a pairwise mismatch rate of 0.125 between the specimens *F6-620* and *AA7-738*, which is  
716 identified as an outlier by a chi-square ( $\chi^2$ ) outlier test (p-value = 0.001). This value is  
717 indistinguishable of what is found between different libraries originating from the same  
718 specimen (chi-square ( $\chi^2$ ) outlier test > 0.05). A median value of a pairwise mismatch rate  
719 between other specimens from Bacho Kiro Cave is 0.231, with a first quartile at 0.225 and a  
720 third quartile at 0.251, which is not significantly different from what is found between pairs of  
721 unrelated ancient individuals from previously published studies (Extended Data Fig. 2B).

722 Furthermore, given the identical start and end coordinates of identified Neandertal  
723 segments across the genomes of *F6-620* and *AA7-738* (Supplementary Information 8, Extended  
724 Data Fig. 8A and Fig. S8.1), we conclude that the specimen *F6-620* found in the Layer J in the  
725 Main Sector of the Bacho Kiro Cave and the specimen *AA7-738* found in the Layer I of the  
726 Niche 1 belonged to the same individual.

727 **Sex determination**

728 We determined the sex of Bacho Kiro Cave specimens by counting the number of fragments  
729 aligning to the X chromosome and the autosomes<sup>3,4</sup>. Based on the expected ratios for female  
730 and male individuals, we concluded that the specimens *F6-620*, *AA7-738*, *BB7-240* and *CC7-*  
731 *335* belonged to male, whereas *CC7-2289* and *BK1653* belonged to female individuals  
732 (Extended Data Fig. 2A).

733

734 **Y chromosome analyses**

735 We enriched the amplified libraries of identified male individuals from Bacho Kiro Cave for  
736 ~6.9 Mb on the Y chromosome<sup>5</sup> and as detailed in Supplementary Information 2. Since we  
737 determined that specimens *F6-620* and *AA7-738* stem from the same individual, we enriched  
738 the amplified libraries of the specimen *F6-620* rather than *AA7-738* as they contain two orders  
739 of magnitude more nuclear DNA (Tab. S2.1, Supplementary Information 2) and have lower  
740 contamination estimates (Tab. S2.10, Supplementary Information 2).

741 After applying the filters detailed in Supplementary Information 2 and restricting our  
742 analyses to fragments of at least 35 bp with a mapping quality of at least 25 that overlap ~6.9  
743 Mb of the Y chromosome, we obtained 15.2-fold coverage at these positions for Bacho Kiro  
744 Cave specimen *F6-620*, 2.5-fold for *BB7-240* and 1.5-fold for *CC7-335*, respectively (Tab.  
745 S2.9). We called an allele at each position by majority call requiring a minimum coverage of 3  
746 for the specimens *F6-620* and *BB7-240* and of 2 for the specimen *CC7-335* using *bam-caller*  
747 (<https://github.com/bodkan/bam-caller>, version: 0.1). Furthermore, we used an aDNA-specific  
748 genotype caller *snpAD*<sup>6</sup> (version: 0.3.4) for generating genotype calls for the Bacho Kiro *F6-*  
749 *620* given the high coverage of the enriched Y chromosome regions for this individual.

750

751 **Y chromosome haplogroup assignment**

752 We extracted genotypes at SNP positions included in the Y-haplogroup tree from the  
753 International Society of Genetic Genealogy (ISOGG, <http://www.isogg.org>, version: 13.38) to  
754 determine the Y chromosome haplogroup of male individuals. Haplogroup calling was  
755 performed using *yHaplo*<sup>7</sup> (version: 1.0.18) using default parameters with the exception of  
756 setting the parameter *ancStopThresh* to 1e6 in order to achieve a full Y-haplogroup tree search.

757 All three male individuals had Y chromosome haplogroups that fell basal to the  
758 supercluster of haplogroups CT and F that are typically found outside of Sub-Saharan Africa  
759 today<sup>8</sup>. The specimen with the highest coverage, *F6-620*, was assigned to Y haplogroup F-  
760 M89. Bacho Kiro *F6-620* carries 22 out of 25 defining mutations of C and FT described by

761 *Karafet et al.*<sup>8</sup>, with no fragments covering three additional defining mutations (M213, P142,  
762 and P187). Next to these 22 mutations, *F6-620* carries three additional mutations that have  
763 been identified to define haplogroup F: M235, P316, and L132.1 (ISOGG, version 13.38).  
764 Specimens *BB7-240* and *CC7-335* were both identified as having Y haplogroup C1 with the  
765 defining SNP F3393. However, due to their lower coverage and only three and two additional  
766 mutations defining haplogroup C, respectively, it was not possible to further assess the exact  
767 location of these lineages within haplogroup C.

768 Both haplogroups F and C1 are rare in present-day individuals. While lineages of  
769 haplogroup C are found commonly in males from East Asia and Oceania, haplogroup F and  
770 C1 and were only found in a few males from mainland Southeast Asia and Japan<sup>9,10</sup>. Therefore,  
771 it had been hypothesized that these haplogroups emerged in Asia after the human migration  
772 out of Africa. However, since the coalescent time for the dispersal of all non-African  
773 haplogroups, including C and F, has been estimated to 47-52 kya (95% CI: 36-62 kya)<sup>11</sup> and  
774 thus overlaps with the estimated age of the Bacho Kiro Cave specimens, it is more plausible to  
775 assume that these Y chromosome haplogroups emerged closely after the migration out of  
776 Africa and spread through Eurasia before being later replaced in all parts of Eurasia but East  
777 Asia and Oceania.

778

#### 779 **References SI4:**

- 780 1 Hublin, J.-J. et al. Initial Upper Palaeolithic Homo sapiens from Bacho Kiro Cave,  
781 Bulgaria. *Nature* **581**, 299-302, doi:10.1038/s41586-020-2259-z (2020).
- 782 2 Mitnik, A. et al. Kinship-based social inequality in Bronze Age Europe. *Science* **366**,  
783 731-734, doi: 10.1126/science.aax6219 (2019).
- 784 3 Meyer, M. et al. Nuclear DNA sequences from the Middle Pleistocene Sima de los  
785 Huesos hominins. *Nature* **531**, 504-507, doi:10.1038/nature17405 (2016).
- 786 4 Fu, Q. et al. The genetic history of Ice Age Europe. *Nature* **534**, 200-205,  
787 doi:10.1038/nature17993 (2016).
- 788 5 Petr, M. et al. The evolutionary history of Neanderthal and Denisovan Y chromosomes.  
789 *Science* **369**, 1653-1656, doi: 10.1126/science.abb6460 (2020).
- 790 6 Prüfer, K. snpAD: An ancient DNA genotype caller. *Bioinformatics* **34**, 4165-4171,  
791 doi: 10.1093/bioinformatics/bty507 (2018).
- 792 7 Poznik, G. D. Identifying Y-chromosome haplogroups in arbitrarily large samples of  
793 sequenced or genotyped men. *bioRxiv*, 088716 (2016).

- 794 8 Karafet, T. M. *et al.* New binary polymorphisms reshape and increase resolution of the  
795 human Y chromosomal haplogroup tree. *Genome Res.* **18**, 830-838, doi:  
796 10.1101/gr.7172008 (2008).
- 797 9 Poznik, G. D. *et al.* Punctuated bursts in human male demography inferred from 1,244  
798 worldwide Y-chromosome sequences. *Nat. Genet.* **48**, 593-599, doi: 10.1038/ng.3559  
799 (2016).
- 800 10 Kutanan, W. *et al.* Contrasting paternal and maternal genetic histories of Thai and Lao  
801 populations. *Mol. Biol. Evol.* **36**, 1490-1506, doi: 10.1093/molbev/msz083 (2019).
- 802 11 Karmin, M. *et al.* A recent bottleneck of Y chromosome diversity coincides with a  
803 global change in culture. *Genome Res.* **25**, 459-466, doi: 10.1101/gr.186684.114  
804 (2015).

805 **Table S4.1 The pairwise mismatch rate between different libraries of Bacho Kiro Cave**  
 806 **specimens originating from the same extract.**

| Specimen   | Library1 | Library2 | nSNPs     | Number of mismatches | Mismatch | Specimen    | Library1 | Library2 | nSNPs   | Number of mismatches | Mismatch |
|------------|----------|----------|-----------|----------------------|----------|-------------|----------|----------|---------|----------------------|----------|
| BK_F6_620  | A11197   | A12357   | 1,149,331 | 140,259              | 0.12     | BK_CC7_2289 | A11200   | A12360   | 82      | 9                    | 0.11     |
|            | A11197   | A12550   | 972,999   | 118,929              | 0.12     |             | A11200   | A12556   | 56      | 12                   | 0.21     |
|            | A11197   | A12944   | 919,264   | 112,759              | 0.12     |             | A11200   | A12947   | 46      | 9                    | 0.20     |
|            | A11197   | A15716   | 907,171   | 111,301              | 0.12     |             | A11200   | A15719   | 57      | 15                   | 0.26     |
|            | A12357   | A12550   | 951,472   | 115,727              | 0.12     |             | A12360   | A12556   | 44      | 10                   | 0.23     |
|            | A12357   | A12944   | 900,051   | 109,650              | 0.12     |             | A12360   | A12947   | 65      | 17                   | 0.26     |
|            | A12357   | A15716   | 888,549   | 108,622              | 0.12     |             | A12360   | A15719   | 59      | 13                   | 0.22     |
|            | A12550   | A12944   | 785,946   | 95,928               | 0.12     |             | A12556   | A12947   | 40      | 5                    | 0.13     |
|            | A12550   | A15716   | 766,463   | 93,566               | 0.12     |             | A12556   | A15719   | 38      | 6                    | 0.16     |
|            | A12944   | A15716   | 728,129   | 89,263               | 0.12     |             | A12947   | A15719   | 33      | 5                    | 0.15     |
| BK_AA7_738 | A11198   | A12358   | 798       | 118                  | 0.15     | BK_CC7_335  | A11201   | A12361   | 184,218 | 24,549               | 0.13     |
|            | A11198   | A12554   | 645       | 82                   | 0.13     |             | A11201   | A12557   | 148,295 | 19,700               | 0.13     |
|            | A11198   | A12945   | 650       | 71                   | 0.11     |             | A11201   | A12948   | 143,923 | 19,136               | 0.13     |
|            | A11198   | A15717   | 413       | 45                   | 0.11     |             | A11201   | A15720   | 140,618 | 19,035               | 0.14     |
|            | A12358   | A12554   | 605       | 75                   | 0.12     |             | A12361   | A12557   | 153,709 | 20,794               | 0.14     |
|            | A12358   | A12945   | 636       | 80                   | 0.13     |             | A12361   | A12948   | 149,491 | 20,276               | 0.14     |
|            | A12358   | A15717   | 408       | 56                   | 0.14     |             | A12361   | A15720   | 146,432 | 20,073               | 0.14     |
|            | A12554   | A12945   | 508       | 54                   | 0.11     |             | A12557   | A12948   | 122,988 | 16,362               | 0.13     |
|            | A12554   | A15717   | 321       | 42                   | 0.13     |             | A12557   | A15720   | 119,343 | 16,020               | 0.13     |
|            | A12945   | A15717   | 313       | 39                   | 0.12     |             | A12948   | A15720   | 116,575 | 15,815               | 0.14     |
| BK_BB7_240 | A11199   | A12359   | 270,665   | 36,026               | 0.13     | BK_1653     | A11203   | A12363   | 825,158 | 94,016               | 0.11     |
|            | A11199   | A12555   | 205,160   | 27,372               | 0.13     |             | A11203   | A12562   | 661,181 | 75,081               | 0.11     |
|            | A11199   | A12946   | 232,601   | 31,271               | 0.13     |             | A11203   | A12950   | 635,860 | 72,355               | 0.11     |
|            | A11199   | F9162    | 207,892   | 28,194               | 0.14     |             | A11203   | A15722   | 623,297 | 72,535               | 0.12     |
|            | A12359   | A12555   | 194,282   | 25,974               | 0.13     |             | A12363   | A12562   | 659,532 | 75,433               | 0.11     |
|            | A12359   | A12946   | 220,265   | 29,906               | 0.14     |             | A12363   | A12950   | 633,979 | 72,743               | 0.11     |
|            | A12359   | A15718   | 198,899   | 27,313               | 0.14     |             | A12363   | A15722   | 617,845 | 71,759               | 0.12     |
|            | A12555   | A12946   | 171,637   | 23,117               | 0.13     |             | A12562   | A12950   | 522,808 | 59,664               | 0.11     |
|            | A12555   | A15718   | 153,784   | 21,068               | 0.14     |             | A12562   | A15722   | 509,476 | 59,031               | 0.12     |
|            | A12946   | A15718   | 174,514   | 23,938               | 0.14     |             | A12950   | A15722   | 493,663 | 57,293               | 0.12     |

807



## 808 **Supplementary Information 5**

### 809 **Population relationships**

810

#### 811 **Principal Component Analysis (PCA)**

812 As a first assessment of the genetic affinities of the studied individuals, we carried out Principal  
813 Component Analysis (PCA) using *smartpca* from the EIGENSOFT package<sup>1,2</sup>. We used 2,970  
814 present-day humans genotyped on 597,573 SNPs of the Affymetrix Human Origins array<sup>3</sup>  
815 ([https://reich.hms.harvard.edu/downloadable-genotypes-present-day-and-ancient-dna-data-](https://reich.hms.harvard.edu/downloadable-genotypes-present-day-and-ancient-dna-data-compiled-published-papers)  
816 [compiled-published-papers](https://reich.hms.harvard.edu/downloadable-genotypes-present-day-and-ancient-dna-data-compiled-published-papers), version V37.2, released February 2019) to estimate the  
817 eigenvectors. We then projected 22 ancient individuals older than 30,000 years before present  
818 (BP)<sup>4-8</sup> with more than 30,000 of the informative SNPs covered onto the plane defined by these  
819 eigenvectors using the ‘lsqproject’ option in *smartpca*<sup>1</sup> (Extended Data Fig. 2C). We further  
820 restricted constructing principle components to a set of 1,444 present-day Eurasians and Native  
821 Americans, and repeated the projection of 22 ancient individuals onto the plane defined by  
822 these eigenvectors (Extended Data Fig. 2D).

823 In the first PCA plot relating present-day African and non-African populations, IUP  
824 Bacho Kiro Cave individuals fall closer to present-day non-Africans than to Africans  
825 (Extended Data Fig. 2C). In the second PCA plot focused on present-day non-African  
826 populations, IUP Bacho Kiro Cave individuals fall close to the origin, similar to the ~45,000-  
827 year-old individual from Siberia (*Ust’Ishim*)<sup>4</sup> and the ~40,000-year-old individual from  
828 Romania (*Oase1*)<sup>5</sup> (Extended Data Fig. 2D). In contrast, Aurignacian individual from Bacho  
829 Kiro Cave, *BK1653*, forms a cluster with later Upper Palaeolithic (UP) individuals from  
830 Western Eurasia which is shifted away from the centre and towards present-day Western  
831 Eurasians in both PCA plots (Extended Data Fig. 2C and D).

832

#### 833 **Outgroup $f_3$ -statistics**

834 We computed the statistics of the form  $f_3(X, Y; Mbuti)$ , which measures the amount of shared  
835 genetic drift between populations X and Y since their separation from an outgroup<sup>3</sup>. We  
836 calculated  $f_3(IUP BK, Y; Mbuti)$  for the three IUP Bacho Kiro Cave individuals (Fig. 2A, Tab.  
837 S5.1, Fig. S5.1) and  $f_3(BK1653, Y; Mbuti)$  (Tab. S5.5 and Extended Data Fig. 3B) as  
838 implemented in the R package *admixr*<sup>9</sup> (version: 0.7.1) and using 263 present-day individuals  
839 from the Simons Genome Diversity Project (SGDP)<sup>10</sup>. Three Mbuti individuals from the same  
840 panel were used as outgroup. Fig. 2A and Tab. S5.1 were calculated using a pool of the three

841 IUP Bacho Kiro individuals (*F6-620*, *BB7-240* and *CC7-335*, nsnp = 1,813,821), whereas  
842 panels in the Fig. S5.1 and Tab. S5.2-S5.4. show the results for each individual separately.

843 We find that IUP Bacho Kiro individuals share more genetic drift with present-day  
844 populations from East Asia, Central Asia and the Americas (Fig. 2A, Fig. S5.1, Tab. S5.1-  
845 S5.4), similar to *Ust'Ishim*<sup>4</sup> (Fig. S5.2A) and *Oase1*<sup>5</sup> (Fig. S5.2B). In contrast, *BK1653* shares  
846 more genetic drift with present-day West Eurasians (Extended Data Fig. 3B, Tab. S5.5), similar  
847 to other UP individuals from Europe from ~38,000 years BP onwards<sup>6,11</sup> (Extended Data Fig.  
848 3C).

849 We performed the genetic clustering of ancient modern humans using outgroup  $f_3$ -  
850 *statistics*<sup>6</sup>, restricting this analysis to ancient individuals with at least 30,000 SNPs on the  
851 “2200k” Panel. We find that IUP Bacho Kiro individuals share more drift with each other than  
852 with other ancient humans (Extended Data Fig. 3A), whereas *BK1653* shares most drift with  
853 later UP individuals in Europe, specifically ~35,000-year-old *GoyetQ116-1* from Belgium and  
854 the members of the ‘Vêstonice’ genetic cluster<sup>6</sup> (Extended Data Fig. 3A).

855

### 856 **Relationship of Bacho Kiro individuals to present-day populations**

857 In order to investigate the relationship of Bacho Kiro Cave individuals to present-day humans  
858 in more detail, we used genotype calls of 263 present-day humans from the Simons Genome  
859 Diversity Project (SGDP)<sup>10</sup> overlapping “2200k” SNPs, and as described in the Supplementary  
860 Information 3. We used *D-statistics*<sup>3</sup> (version: v5.1) as implemented in the R package *admixr*<sup>9</sup>  
861 (version: 0.7.1) to infer the relationships among individuals, computing standard errors using  
862 a Weighted Block Jackknife<sup>3,12</sup> across all autosomes with equally sized blocks of 5 million  
863 base pairs (5 Mb). Guided by the results of the PCA and outgroup  $f_3$ -*statistics*, we first  
864 computed  $D$  (*African, non-African; Bacho Kiro Cave individual, Chimpanzee*) using genomes  
865 of present-day Mbuti, Yoruba, San and Dinka, as well as genomes of present-day non-Africans  
866 from SGDP<sup>10</sup>, and the genome of a chimpanzee (*panTro2*) as outgroup. We find that all Bacho  
867 Kiro Cave individuals are significantly closer to present-day non-Africans than to present-day  
868 Africans ( $|Z| > 41.49$ , Fig. S5.3-S5.6).

869 We further explored whether Bacho Kiro Cave individuals are particularly close to a  
870 certain present-day population outside of Africa by calculating  $D$  (*non-African<sub>1</sub>, non-African<sub>2</sub>;*  
871 *Bacho Kiro Cave individual, Chimpanzee*) and  $D$  (*non-African<sub>1</sub>, non-African<sub>2</sub>;* *Bacho Kiro*  
872 *Cave individual, Mbuti*). We find that IUP Bacho Kiro Cave individuals share significantly  
873 more alleles with present-day East Asians, Southeast Asians and Native Americans than with  
874 present-day Europeans (Fig. S5.7 and S5.8). However, present-day Europeans derive part of

875 their ancestry from a population that diverged from other non-Africans before they diverged  
876 from each other ('a Basal Eurasian' population)<sup>13-15</sup> and similar results are obtained when  
877 substituting IUP Bacho Kiro Cave individuals in these statistics with *Oase1*<sup>5</sup> or *Ust'Ishim*<sup>4</sup>  
878 (Fig. S5.9 and S5.10), both of whom are known not to have contributed their ancestry to later  
879 populations.

880 Thus, we replaced present-day Europeans in these statistics with Upper Palaeolithic<sup>6,7,11</sup>  
881 and Mesolithic<sup>13</sup> individuals that lack Basal Eurasian ancestry. Whereas in those instances, and  
882 with the additional data from *Oase 1*, both *Oase 1* and *Ust'Ishim* share equally many alleles  
883 with Europeans before the introduction of agriculture as with present-day East Asians and  
884 Native Americans<sup>5</sup>, ( $|Z| < 3$ , Extended Data Fig. 4B and C), IUP Bacho Kiro Cave individuals  
885 continue to share significantly more alleles with present-day East Asians and Native  
886 Americans, and some Central Asians and Siberians from SGDP than with pre-agricultural  
887 Europeans such as the ~38,000-year-old *Kostenki 14* ( $3.08 \leq |Z| \leq 5.32$ , Extended Data Fig.  
888 4A). These results remain stable after restricting the analyses to transversion polymorphisms  
889 which are not susceptible to errors due to aDNA modifications ( $2.22 \leq Z \leq 3.92$ , Fig. S5.13).

890 Given the slightly higher Neandertal ancestry in present-day East Asians than in West  
891 Eurasians<sup>16,17</sup> and the higher Neandertal ancestry in IUP Bacho Kiro individuals (see  
892 Supplementary Information 7 and 8), we substituted Mbuti as outgroup in  $D(\textit{pre-agricultural}$   
893  $\textit{European, non-African}_2; \textit{IUP Bacho Kiro, Outgroup})$  with the high coverage genome of  
894 *Vindija 33.19* Neandertal<sup>17</sup> to account for a possible attraction to East Asians due to the higher  
895 Neandertal ancestry. We find, however, that the results of these statistics remain significant  
896 regardless of the outgroup ( $3.05 \leq Z \leq 5.90$ , Fig. S5.14).

897 In contrast to the IUP Bacho Kiro Cave individuals, *BKI653* that lived ~11,000 years  
898 later<sup>18,19</sup> shares significantly more alleles with present-day Europeans than with any other  
899 superpopulation in SGDP<sup>10</sup> (Fig. S5.11 and S5.12), as it was previously found for other Upper  
900 Palaeolithic individuals from Western Eurasia starting with the ~38,000-year-old *Kostenki14*  
901 from Russia<sup>6,11</sup>.

902

### 903 **Relationship of Bacho Kiro Cave individuals other ancient humans**

904 We computed  $D(\textit{ancient}_1, \textit{ancient}_2; \textit{IUP Bacho Kiro, Mbuti})$  and  $D(\textit{ancient}_1, \textit{IUP Bacho Kiro};$   
905  $\textit{ancient}_2, \textit{Mbuti})$  for a range of ancient modern humans using "1240k" and/or "2200k" SNP  
906 Panels, depending on the set of sites for which the data of previously published individuals are  
907 available (see Supplementary Information 3 for dataset details). By computing  $D(\textit{IUP Bacho}$   
908  $\textit{Kiro}_1, \textit{IUP Bacho Kiro}_2; X, \textit{Mbuti})$  we find that the *IUP Bacho Kiro F6-620*, *BB7-240* and

909 CC7-335 form a clade to exclusion of other ancient individuals (all  $|Z| < 3$ , Tab. S5.8-S5.10).  
910 Since we were able to recover only 7,696 SNPs on the “2200k” Panel for the IUP *Bacho Kiro*  
911 CC7-2289 (Extended Data Tab. 1, Supplementary Information 2, Tab. S2.8), we used  $D(IUP$   
912 *Bacho Kiro1, X; Bacho Kiro CC7-2289, Mbuti) to explore broad population affiliations of this  
913 individual. We find, to the limits of our resolution, that she on average shares significantly  
914 more alleles with other IUP Bacho Kiro Cave individuals than with other ancient modern  
915 humans (Tab. S5.7). Furthermore, we find  $D(IUP Bacho Kiro1, IUP Bacho Kiro2; IUP Bacho$   
916 *Kiro3, Mbuti)  $\sim 0$  for all combinations of IUP Bacho Kiro Cave individuals (Tab. S5.6).**

917 Interestingly, when comparing IUP Bacho Kiro Cave individuals to other early Upper  
918 Palaeolithic humans from Eurasia, we find that they share significantly more alleles with the  
919  $\sim 40,000$ -year-old *Tianyuan* individual from China<sup>20</sup> than with the  $\sim 38,000$ -year-old  
920 *Kostenki14* from west Russia ( $3.17 \leq |Z| \leq 4.21$ , Fig. 2B and C, Tab. S5.12-S5.14).  
921 Furthermore, IUP *Bacho Kiro F6-620* shares significantly more alleles with ancient Native  
922 Americans such as the  $\sim 13,000$ -year-old *Anzick21*,  $\sim 11,000$ -year-old *Upward Sun River* and  
923 *Spirit Cave* individuals<sup>22,23</sup>, the  $\sim 9,000$ -year-old *Kennewick24*, and even with the  $\sim 4,000$ -year-  
924 old *Saqqaq25* than with *Kostenki14* ( $3.70 \leq |Z| \leq 4.72$ , Fig. 2C, Tab. S5.15). From other West  
925 Eurasian Upper Palaeolithic humans, IUP Bacho Kiro Cave individuals share significantly  
926 more derived alleles with *Oase1* ( $3.56 \leq |Z| \leq 4.26$ , Fig. 2C, Tab. S5.12-S5.14) and the  $\sim 35,000$ -  
927 year-old *Goyet Q116-1* from Belgium ( $3.24 \leq |Z| \leq 4.25$ , Fig. 2C, Tab. S5.12-S5.14) than with  
928 *Kostenki14*. We note, however, that the higher proportion of Neandertal ancestry (see  
929 Supplementary Information 7 and 8) could be driving the excess of alleles shared by the IUP  
930 Bacho Kiro Cave individuals and the *Oase1*. Alternatively, the IUP Bacho Kiro Cave  
931 individuals and *Oase1* could belong to related but not identical populations, given that they  
932 differ in their overall relationship to later populations.

933 We find that *Bacho Kiro BK1653* shares significantly more alleles with later West  
934 Eurasians than with the IUP Bacho Kiro Cave individuals by  $D($ *Test, IUP Bacho Kiro;*  
935 *BK1653, Mbuti)  $\gg 0$  ( $3.01 \leq |Z| \leq 17.39$ ) where *Test* individual is any of the later West  
936 Eurasians starting with *Kostenki14*. Specifically, *Bacho Kiro BK1653* is closest to the  
937 *GoyetQ116-1* and to the members of the ‘Vestonice’ genetic cluster, i.e. individuals that lived  
938 between  $\sim 34,000$  and  $\sim 26,000$  years ago and were associated with the Gravettian period.  
939 Moreover,  $D($ *GoyetQ116-1, Vestonice16; BK1653, Mbuti),  $D($ *BK1653, GoyetQ116-1;*  
940 *Vestonice16, Mbuti) and  $D($ *BK1653, Vestonice16; GoyetQ116-1, Mbuti) are all  $\sim 0$  (all  $|Z| < 3$ ,  
941 Tab. S5.11 and Tab. S5.15), indicating that *BK1653* shares equally many alleles with these  
942 individuals.****

943 **References SI5:**

- 944 1 Patterson, N., Price, A. L. & Reich, D. Population structure and eigenanalysis. *PLoS*  
945 *Genet* **2**, e190, doi:10.1371/journal.pgen.0020190 (2006).
- 946 2 Price, A. L. *et al.* Principal components analysis corrects for stratification in genome-  
947 wide association studies. *Nat. Genet.* **38**, 904-909, doi: 10.1038/ng1847 (2006).
- 948 3 Patterson, N. *et al.* Ancient admixture in human history. *Genetics* **192**, 1065-1093,  
949 doi:10.1534/genetics.112.145037 (2012).
- 950 4 Fu, Q. *et al.* Genome sequence of a 45,000-year-old modern human from western  
951 Siberia. *Nature* **514**, 445-449, doi:10.1038/nature13810 (2014).
- 952 5 Fu, Q. *et al.* An early modern human from Romania with a recent Neanderthal ancestor.  
953 *Nature* **524**, 216-219, doi:10.1038/nature14558 (2015).
- 954 6 Fu, Q. *et al.* The genetic history of Ice Age Europe. *Nature* **534**, 200-205,  
955 doi:10.1038/nature17993 (2016).
- 956 7 Sikora, M. *et al.* Ancient genomes show social and reproductive behavior of early  
957 Upper Paleolithic foragers. *Science* **358**, 659-662, doi: 10.1126/science.aao1807  
958 (2017).
- 959 8 Sikora, M. *et al.* The population history of northeastern Siberia since the Pleistocene.  
960 *Nature* **570**, 182-188, doi: 10.1038/s41586-019-1279-z (2019).
- 961 9 Petr, M., Vernot, B. & Kelso, J. admixr—R package for reproducible analyses using  
962 ADMIXTOOLS. *Bioinformatics* **35**, 3194-3195 (2019).
- 963 10 Mallick, S. *et al.* The Simons Genome Diversity Project: 300 genomes from 142 diverse  
964 populations. *Nature* **538**, 201-206, doi:10.1038/nature18964 (2016).
- 965 11 Seguin-Orlando, A. *et al.* Genomic structure in Europeans dating back at least 36,200  
966 years. *Science* **346**, 1113-1118, doi:10.1126/science.aaa0114 (2014).
- 967 12 Busing, F. M. T. A., Meijer, E. & Van Der Leeden, R. Delete-m jackknife for unequal  
968 m. *Statistics and Computing* **9**, 3-8, doi:Doi 10.1023/A:1008800423698 (1999).
- 969 13 Lazaridis, I. *et al.* Ancient human genomes suggest three ancestral populations for  
970 present-day Europeans. *Nature* **513**, 409-413, doi:10.1038/nature13673 (2014).
- 971 14 Lazaridis, I. *et al.* Genomic insights into the origin of farming in the ancient Near East.  
972 *Nature* **536**, 419-424, doi: 10.1038/nature19310 (2016).
- 973 15 Lazaridis, I. *et al.* Paleolithic DNA from the Caucasus reveals core of West Eurasian  
974 ancestry. *bioRxiv*, 423079 (2018).
- 975 16 Wall, J. D. *et al.* Higher levels of neanderthal ancestry in East Asians than in Europeans.  
976 *Genetics* **194**, 199-209, doi:10.1534/genetics.112.148213 (2013).

- 977 17 Prüfer, K. *et al.* A high-coverage Neandertal genome from Vindija Cave in Croatia.  
978 *Science* **358**, 655-658, doi: 10.1126/science.aao1887 (2017).
- 979 18 Hublin, J.-J. *et al.* Initial Upper Palaeolithic Homo sapiens from Bacho Kiro Cave,  
980 Bulgaria. *Nature* **581**, 299-302, doi:10.1038/s41586-020-2259-z (2020).
- 981 19 Fewlass, H. *et al.* A 14 C chronology for the Middle to Upper Palaeolithic transition at  
982 Bacho Kiro Cave, Bulgaria. *Nat. Ecol. Evol.* **4**, 794-801, doi: 10.1038/s41559-020-  
983 1136-3 (2020).
- 984 20 Yang, M. A. *et al.* 40,000-Year-Old Individual from Asia Provides Insight into Early  
985 Population Structure in Eurasia. *Curr. Biol.* **27**, 3202-3208. e3209, doi:  
986 10.1016/j.cub.2017.09.030 (2017).
- 987 21 Rasmussen, M. *et al.* The genome of a Late Pleistocene human from a Clovis burial  
988 site in western Montana. *Nature* **506**, 225-229, doi:10.1038/nature13025 (2014).
- 989 22 Moreno-Mayar, J. V. *et al.* Terminal Pleistocene Alaskan genome reveals first founding  
990 population of Native Americans. *Nature* **553**, 203-207, doi: 10.1038/nature25173  
991 (2018).
- 992 23 Moreno-Mayar, J. V. *et al.* Early human dispersals within the Americas. *Science* **362**,  
993 eaav2621, doi:10.1126/science.aav2621 (2018).
- 994 24 Rasmussen, M. *et al.* The ancestry and affiliations of Kennewick Man. *Nature* **523**,  
995 455-458, doi:10.1038/nature14625 (2015).
- 996 25 Rasmussen, M. *et al.* Ancient human genome sequence of an extinct Palaeo-Eskimo.  
997 *Nature* **463**, 757-762, doi:10.1038/nature08835 (2010).

998 **Table S5.1 Shared genetic drift between IUP Bacho Kiro Cave individuals and present-**  
 999 **day humans as measured by  $f_3$ (IUP Bacho Kiro Cave individuals, present-day humans;**  
 1000 **Mbuti).** Present-day modern human genomes from SGDP<sup>10</sup> were used.  $f_3$  values reported were  
 1001 calculated using ADMIXTOOLS<sup>3</sup> as implemented in *admixr*<sup>9</sup> and were used for plotting Fig.  
 1002 2A in the main text. Standard errors (SE) were computed using a Weighted Block Jackknife<sup>3,12</sup>  
 1003 across all autosomes of the “2200k” Panel using a block size of 5Mb. Number of SNPs  
 1004 overlapping among individuals reported in the column “nsnps”.

| A       | B               | C     | $f_3$  | SE     | Zscore | nsnps     |
|---------|-----------------|-------|--------|--------|--------|-----------|
| IUP_BKs | She             | Mbuti | 0.2250 | 0.0034 | 65.94  | 1,241,880 |
| IUP_BKs | Japanese        | Mbuti | 0.2250 | 0.0034 | 67.04  | 1,268,517 |
| IUP_BKs | Ami             | Mbuti | 0.2240 | 0.0034 | 65.56  | 1,238,449 |
| IUP_BKs | Han             | Mbuti | 0.2240 | 0.0034 | 65.87  | 1,244,308 |
| IUP_BKs | Yi              | Mbuti | 0.2239 | 0.0034 | 65.67  | 1,245,099 |
| IUP_BKs | Kinh            | Mbuti | 0.2236 | 0.0034 | 65.50  | 1,244,971 |
| IUP_BKs | Lahu            | Mbuti | 0.2236 | 0.0034 | 66.48  | 1,241,407 |
| IUP_BKs | Oroqen          | Mbuti | 0.2234 | 0.0034 | 65.97  | 1,242,864 |
| IUP_BKs | Tujia           | Mbuti | 0.2234 | 0.0034 | 65.85  | 1,243,408 |
| IUP_BKs | Karitiana       | Mbuti | 0.2234 | 0.0034 | 64.92  | 1,217,789 |
| IUP_BKs | Dai             | Mbuti | 0.2234 | 0.0034 | 66.20  | 1,269,344 |
| IUP_BKs | Sherpa          | Mbuti | 0.2233 | 0.0034 | 66.54  | 1,240,952 |
| IUP_BKs | Tibetan         | Mbuti | 0.2231 | 0.0034 | 65.28  | 1,245,035 |
| IUP_BKs | Dusun           | Mbuti | 0.2231 | 0.0034 | 65.90  | 1,239,008 |
| IUP_BKs | Eskimo_Naukan   | Mbuti | 0.2230 | 0.0033 | 67.17  | 1,235,556 |
| IUP_BKs | Miao            | Mbuti | 0.2230 | 0.0033 | 67.07  | 1,242,930 |
| IUP_BKs | Igorot          | Mbuti | 0.2229 | 0.0034 | 64.82  | 1,235,592 |
| IUP_BKs | Naxi            | Mbuti | 0.2229 | 0.0034 | 65.83  | 1,271,797 |
| IUP_BKs | Korean          | Mbuti | 0.2228 | 0.0033 | 66.56  | 1,244,759 |
| IUP_BKs | Yakut           | Mbuti | 0.2227 | 0.0035 | 63.87  | 1,245,519 |
| IUP_BKs | Ulchi           | Mbuti | 0.2226 | 0.0033 | 67.12  | 1,242,300 |
| IUP_BKs | Onge            | Mbuti | 0.2226 | 0.0033 | 66.85  | 1,228,377 |
| IUP_BKs | Eskimo_Chaplin  | Mbuti | 0.2224 | 0.0034 | 65.25  | 1,196,996 |
| IUP_BKs | Atayal          | Mbuti | 0.2222 | 0.0035 | 62.77  | 1,195,780 |
| IUP_BKs | Eskimo_Sireniki | Mbuti | 0.2222 | 0.0033 | 67.10  | 1,239,857 |
| IUP_BKs | Burmese         | Mbuti | 0.2221 | 0.0033 | 66.75  | 1,249,617 |
| IUP_BKs | Xibo            | Mbuti | 0.2220 | 0.0034 | 65.80  | 1,245,927 |
| IUP_BKs | Thai            | Mbuti | 0.2219 | 0.0034 | 65.58  | 1,247,431 |
| IUP_BKs | Hezhen          | Mbuti | 0.2219 | 0.0034 | 66.21  | 1,243,812 |
| IUP_BKs | Tu              | Mbuti | 0.2218 | 0.0034 | 65.29  | 1,248,856 |
| IUP_BKs | Even            | Mbuti | 0.2218 | 0.0034 | 65.33  | 1,272,478 |
| IUP_BKs | Chipewyan       | Mbuti | 0.2217 | 0.0035 | 64.16  | 1,232,134 |
| IUP_BKs | Surui           | Mbuti | 0.2216 | 0.0034 | 64.99  | 1,218,304 |
| IUP_BKs | Daur            | Mbuti | 0.2216 | 0.0035 | 63.76  | 1,201,096 |
| IUP_BKs | Cambodian       | Mbuti | 0.2215 | 0.0033 | 66.15  | 1,246,554 |
| IUP_BKs | Khonda_Dora     | Mbuti | 0.2212 | 0.0034 | 64.56  | 1,199,909 |
| IUP_BKs | Mayan           | Mbuti | 0.2210 | 0.0033 | 66.06  | 1,234,796 |
| IUP_BKs | Piapoco         | Mbuti | 0.2208 | 0.0033 | 65.93  | 1,229,698 |
| IUP_BKs | Itelman         | Mbuti | 0.2206 | 0.0035 | 63.60  | 1,198,070 |
| IUP_BKs | Kurumba         | Mbuti | 0.2206 | 0.0034 | 65.20  | 1,199,474 |
| IUP_BKs | Botocudo        | Mbuti | 0.2205 | 0.0034 | 64.56  | 1,111,320 |
| IUP_BKs | Zapotec         | Mbuti | 0.2204 | 0.0033 | 66.20  | 1,237,121 |
| IUP_BKs | Chane           | Mbuti | 0.2203 | 0.0034 | 65.07  | 1,196,463 |
| IUP_BKs | Mixe            | Mbuti | 0.2202 | 0.0034 | 65.69  | 1,230,707 |
| IUP_BKs | Kharia          | Mbuti | 0.2196 | 0.0034 | 64.47  | 1,200,711 |
| IUP_BKs | Kusunda         | Mbuti | 0.2195 | 0.0033 | 66.63  | 1,239,127 |
| IUP_BKs | Nahua           | Mbuti | 0.2193 | 0.0034 | 64.38  | 1,198,257 |
| IUP_BKs | Quechua         | Mbuti | 0.2192 | 0.0033 | 66.56  | 1,255,945 |
| IUP_BKs | Bougainville    | Mbuti | 0.2186 | 0.0034 | 64.98  | 1,232,440 |
| IUP_BKs | Altaián         | Mbuti | 0.2185 | 0.0034 | 64.03  | 1,202,284 |
| IUP_BKs | Kyrgyz          | Mbuti | 0.2184 | 0.0033 | 66.50  | 1,256,462 |
| IUP_BKs | Hawaiian        | Mbuti | 0.2184 | 0.0035 | 63.13  | 1,199,752 |
| IUP_BKs | Pima            | Mbuti | 0.2183 | 0.0034 | 64.41  | 1,229,699 |
| IUP_BKs | Cree            | Mbuti | 0.2180 | 0.0033 | 66.79  | 1,251,803 |
| IUP_BKs | Aleut           | Mbuti | 0.2171 | 0.0033 | 66.50  | 1,252,508 |
| IUP_BKs | Papuan          | Mbuti | 0.2171 | 0.0034 | 64.18  | 1,300,909 |
| IUP_BKs | Australian      | Mbuti | 0.2171 | 0.0034 | 64.01  | 1,246,350 |
| IUP_BKs | Yadava          | Mbuti | 0.2170 | 0.0033 | 66.41  | 1,253,859 |
| IUP_BKs | Mala            | Mbuti | 0.2168 | 0.0032 | 67.45  | 1,287,674 |
| IUP_BKs | Chukchi         | Mbuti | 0.2161 | 0.0033 | 64.78  | 1,209,162 |
| IUP_BKs | Tubalar         | Mbuti | 0.2161 | 0.0033 | 65.38  | 1,254,292 |
| IUP_BKs | Mansi           | Mbuti | 0.2159 | 0.0033 | 65.33  | 1,256,117 |
| IUP_BKs | Madiga          | Mbuti | 0.2157 | 0.0033 | 65.57  | 1,255,390 |
| IUP_BKs | Relli           | Mbuti | 0.2154 | 0.0033 | 65.81  | 1,254,885 |
| IUP_BKs | Irula           | Mbuti | 0.2153 | 0.0033 | 65.73  | 1,252,206 |
| IUP_BKs | Mixtec          | Mbuti | 0.2152 | 0.0033 | 65.60  | 1,245,981 |
| IUP_BKs | Kapu            | Mbuti | 0.2149 | 0.0033 | 64.35  | 1,256,970 |
| IUP_BKs | Hazara          | Mbuti | 0.2149 | 0.0033 | 64.46  | 1,257,243 |
| IUP_BKs | Uygur           | Mbuti | 0.2148 | 0.0032 | 66.33  | 1,261,144 |
| IUP_BKs | Bengali         | Mbuti | 0.2144 | 0.0032 | 66.70  | 1,257,345 |

| A       | B               | C     | $f_3$  | SE     | Zscore | nsnps     |
|---------|-----------------|-------|--------|--------|--------|-----------|
| IUP_BKs | Punjabi         | Mbuti | 0.2137 | 0.0032 | 66.90  | 1,312,715 |
| IUP_BKs | Tlingit         | Mbuti | 0.2133 | 0.0033 | 65.45  | 1,257,431 |
| IUP_BKs | Brahmin         | Mbuti | 0.2125 | 0.0032 | 66.53  | 1,258,918 |
| IUP_BKs | Saami           | Mbuti | 0.2116 | 0.0033 | 64.01  | 1,256,098 |
| IUP_BKs | Sindhi          | Mbuti | 0.2115 | 0.0033 | 63.35  | 1,258,843 |
| IUP_BKs | Pathan          | Mbuti | 0.2111 | 0.0032 | 65.29  | 1,260,590 |
| IUP_BKs | Burusho         | Mbuti | 0.2110 | 0.0032 | 65.13  | 1,260,397 |
| IUP_BKs | Kashmiri_Pandit | Mbuti | 0.2107 | 0.0033 | 63.59  | 1,206,177 |
| IUP_BKs | Finnish         | Mbuti | 0.2098 | 0.0032 | 66.10  | 1,292,610 |
| IUP_BKs | Kalash          | Mbuti | 0.2095 | 0.0032 | 66.18  | 1,251,539 |
| IUP_BKs | Icelandic       | Mbuti | 0.2095 | 0.0033 | 64.09  | 1,261,703 |
| IUP_BKs | Maori           | Mbuti | 0.2093 | 0.0033 | 63.16  | 1,210,165 |
| IUP_BKs | Czech           | Mbuti | 0.2093 | 0.0033 | 62.58  | 1,208,755 |
| IUP_BKs | Tajik           | Mbuti | 0.2090 | 0.0032 | 64.67  | 1,258,992 |
| IUP_BKs | Estonian        | Mbuti | 0.2090 | 0.0033 | 62.46  | 1,261,200 |
| IUP_BKs | Bergamo         | Mbuti | 0.2088 | 0.0034 | 61.38  | 1,209,000 |
| IUP_BKs | Russian         | Mbuti | 0.2087 | 0.0033 | 63.74  | 1,261,648 |
| IUP_BKs | French          | Mbuti | 0.2080 | 0.0032 | 64.80  | 1,260,502 |
| IUP_BKs | Orcadian        | Mbuti | 0.2080 | 0.0032 | 64.53  | 1,261,779 |
| IUP_BKs | English         | Mbuti | 0.2077 | 0.0032 | 65.63  | 1,261,866 |
| IUP_BKs | Albanian        | Mbuti | 0.2077 | 0.0033 | 63.88  | 1,208,168 |
| IUP_BKs | Hungarian       | Mbuti | 0.2071 | 0.0033 | 62.86  | 1,262,301 |
| IUP_BKs | Brahui          | Mbuti | 0.2070 | 0.0032 | 65.51  | 1,259,647 |
| IUP_BKs | Greek           | Mbuti | 0.2070 | 0.0032 | 65.51  | 1,260,821 |
| IUP_BKs | Adygei          | Mbuti | 0.2067 | 0.0032 | 64.85  | 1,261,156 |
| IUP_BKs | North_Ossetian  | Mbuti | 0.2067 | 0.0032 | 64.72  | 1,261,983 |
| IUP_BKs | Abkhasian       | Mbuti | 0.2067 | 0.0033 | 63.21  | 1,260,283 |
| IUP_BKs | Polish          | Mbuti | 0.2065 | 0.0034 | 60.33  | 1,208,763 |
| IUP_BKs | Sardinian       | Mbuti | 0.2063 | 0.0032 | 64.20  | 1,260,434 |
| IUP_BKs | Armenian        | Mbuti | 0.2061 | 0.0033 | 63.30  | 1,233,323 |
| IUP_BKs | Bulgarian       | Mbuti | 0.2059 | 0.0031 | 65.72  | 1,262,386 |
| IUP_BKs | Basque          | Mbuti | 0.2059 | 0.0033 | 63.02  | 1,260,211 |
| IUP_BKs | Balochi         | Mbuti | 0.2059 | 0.0034 | 60.92  | 1,202,820 |
| IUP_BKs | Iranian         | Mbuti | 0.2056 | 0.0032 | 65.12  | 1,261,197 |
| IUP_BKs | Turkish         | Mbuti | 0.2056 | 0.0033 | 63.00  | 1,261,498 |
| IUP_BKs | Georgian        | Mbuti | 0.2055 | 0.0032 | 64.64  | 1,261,255 |
| IUP_BKs | Chechen         | Mbuti | 0.2055 | 0.0033 | 62.35  | 1,208,291 |
| IUP_BKs | Lezgin          | Mbuti | 0.2053 | 0.0032 | 64.31  | 1,261,140 |
| IUP_BKs | Spanish         | Mbuti | 0.2052 | 0.0032 | 61.17  | 1,261,884 |
| IUP_BKs | Crete           | Mbuti | 0.2050 | 0.0033 | 64.54  | 1,208,721 |
| IUP_BKs | Tuscan          | Mbuti | 0.2049 | 0.0033 | 62.63  | 1,263,034 |
| IUP_BKs | Iraqi_Jew       | Mbuti | 0.2024 | 0.0032 | 63.54  | 1,260,134 |
| IUP_BKs | Makrani         | Mbuti | 0.2024 | 0.0032 | 63.98  | 1,259,368 |
| IUP_BKs | Druze           | Mbuti | 0.2010 | 0.0031 | 64.31  | 1,260,987 |
| IUP_BKs | Samaritan       | Mbuti | 0.1996 | 0.0032 | 62.18  | 1,202,831 |
| IUP_BKs | Yemenite_Jew    | Mbuti | 0.1965 | 0.0031 | 62.83  | 1,260,131 |
| IUP_BKs | Jordanian       | Mbuti | 0.1964 | 0.0031 | 63.22  | 1,296,397 |
| IUP_BKs | BedouinB        | Mbuti | 0.1962 | 0.0031 | 63.58  | 1,255,127 |
| IUP_BKs | Palestinian     | Mbuti | 0.1945 | 0.0031 | 62.31  | 1,299,657 |
| IUP_BKs | Saharawi        | Mbuti | 0.1771 | 0.0030 | 59.31  | 1,270,496 |
| IUP_BKs | Mozabite        | Mbuti | 0.1735 | 0.0030 | 57.64  | 1,271,305 |
| IUP_BKs | Somali          | Mbuti | 0.1362 | 0.0030 | 45.71  | 1,204,964 |
| IUP_BKs | Masai           | Mbuti | 0.1130 | 0.0026 | 44.20  | 1,270,410 |
| IUP_BKs | Dinka           | Mbuti | 0.0918 | 0.0024 | 37.82  | 1,267,654 |
| IUP_BKs | Mandenka        | Mbuti | 0.0879 | 0.0024 | 36.94  | 1,286,047 |
| IUP_BKs | Gambian         | Mbuti | 0.0877 | 0.0023 | 37.87  | 1,285,227 |
| IUP_BKs | Luo             | Mbuti | 0.0862 | 0.0023 | 37.45  | 1,279,191 |
| IUP_BKs | BantuKenya      | Mbuti | 0.0853 | 0.0023 | 36.33  | 1,280,312 |
| IUP_BKs | Esan            | Mbuti | 0.0838 | 0.0023 | 36.18  | 1,287,115 |
| IUP_BKs | Luhya           | Mbuti | 0.0838 | 0.0024 | 35.56  | 1,279,996 |
| IUP_BKs | Yoruba          | Mbuti | 0.0830 | 0.0023 | 36.78  | 1,288,387 |
| IUP_BKs | Igbo            | Mbuti | 0.0819 | 0.0023 | 35.22  | 1,286,896 |
| IUP_BKs | Mende           | Mbuti | 0.0818 | 0.0023 | 35.61  | 1,285,776 |
| IUP_BKs | Lemande         | Mbuti | 0.0806 | 0.0023 | 35.42  | 1,283,720 |
| IUP_BKs | Kongo           | Mbuti | 0.0794 | 0.0024 | 33.53  | 1,213,147 |
| IUP_BKs | BantuHerero     | Mbuti | 0.0781 | 0.0023 | 34.47  | 1,280,684 |
| IUP_BKs | BantuTswana     | Mbuti | 0.0730 | 0.0021 | 34.23  | 1,279,719 |
| IUP_BKs | Biaka           | Mbuti | 0.0517 | 0.0019 | 27.08  | 1,259,090 |
| IUP_BKs | Ju_hoan_North   | Mbuti | 0.0479 | 0.0018 | 25.88  | 1,284,494 |
| IUP_BKs | Khomani_San     | Mbuti | 0.0451 | 0.0019 | 23.85  | 1,243,210 |

1006 **Table S5.2 Shared genetic drift between *Bacho Kiro F6-620* and present-day humans as**  
1007 **measured by  $f_3(F6-620, \text{present-day humans}; \text{Mbuti})$ .** Present-day modern human genomes  
1008 from SGDP<sup>10</sup> were used.  $f_3$  values reported were calculated using ADMIXTOOLS<sup>3</sup> as  
1009 implemented in *admixr*<sup>9</sup> and were used for plotting Fig. S5.1A. Standard errors (SE) were  
1010 computed using a Weighted Block Jackknife<sup>3,12</sup> across all autosomes using a block size of 5Mb.  
1011 Number of SNPs overlapping among individuals reported in the column “nsnps”.

| A      | B               | C     | $f_3$  | SE     | Zscore | nsnps     |
|--------|-----------------|-------|--------|--------|--------|-----------|
| F6_620 | Japanese        | Mbuti | 0.2248 | 0.0036 | 62.81  | 1,228,053 |
| F6_620 | She             | Mbuti | 0.2247 | 0.0037 | 60.76  | 1,197,191 |
| F6_620 | Yi              | Mbuti | 0.2235 | 0.0037 | 61.06  | 1,201,115 |
| F6_620 | Karitiana       | Mbuti | 0.2235 | 0.0037 | 60.50  | 1,168,378 |
| F6_620 | Han             | Mbuti | 0.2234 | 0.0036 | 61.33  | 1,200,062 |
| F6_620 | Kinh            | Mbuti | 0.2232 | 0.0037 | 60.88  | 1,200,593 |
| F6_620 | Tujia           | Mbuti | 0.2231 | 0.0036 | 61.52  | 1,198,922 |
| F6_620 | Dai             | Mbuti | 0.2230 | 0.0036 | 62.01  | 1,228,660 |
| F6_620 | Sherpa          | Mbuti | 0.2230 | 0.0036 | 62.22  | 1,196,177 |
| F6_620 | Tibetan         | Mbuti | 0.2230 | 0.0037 | 60.80  | 1,200,705 |
| F6_620 | Dusun           | Mbuti | 0.2229 | 0.0036 | 61.42  | 1,193,697 |
| F6_620 | Eskimo_Naukan   | Mbuti | 0.2228 | 0.0035 | 63.08  | 1,189,590 |
| F6_620 | Ami             | Mbuti | 0.2227 | 0.0037 | 60.34  | 1,193,155 |
| F6_620 | Oroqen          | Mbuti | 0.2226 | 0.0036 | 61.15  | 1,198,307 |
| F6_620 | Igorot          | Mbuti | 0.2225 | 0.0037 | 60.10  | 1,189,720 |
| F6_620 | Korean          | Mbuti | 0.2225 | 0.0036 | 61.95  | 1,200,345 |
| F6_620 | Miao            | Mbuti | 0.2224 | 0.0036 | 62.23  | 1,198,347 |
| F6_620 | Lahu            | Mbuti | 0.2223 | 0.0036 | 61.85  | 1,196,775 |
| F6_620 | Yakut           | Mbuti | 0.2223 | 0.0037 | 59.45  | 1,201,060 |
| F6_620 | Naxi            | Mbuti | 0.2223 | 0.0036 | 61.57  | 1,231,524 |
| F6_620 | Eskimo_Sireniki | Mbuti | 0.2223 | 0.0036 | 62.56  | 1,194,560 |
| F6_620 | Onge            | Mbuti | 0.2222 | 0.0036 | 62.48  | 1,181,660 |
| F6_620 | Eskimo_Chaplin  | Mbuti | 0.2220 | 0.0036 | 60.94  | 1,144,393 |
| F6_620 | Ulchi           | Mbuti | 0.2219 | 0.0036 | 62.47  | 1,197,616 |
| F6_620 | Xibo            | Mbuti | 0.2216 | 0.0036 | 62.24  | 1,201,887 |
| F6_620 | Atayal          | Mbuti | 0.2215 | 0.0038 | 57.77  | 1,143,068 |
| F6_620 | Chipewyan       | Mbuti | 0.2214 | 0.0037 | 59.67  | 1,185,370 |
| F6_620 | Burmese         | Mbuti | 0.2213 | 0.0035 | 62.62  | 1,206,044 |
| F6_620 | Hezhen          | Mbuti | 0.2210 | 0.0036 | 61.73  | 1,199,172 |
| F6_620 | Tu              | Mbuti | 0.2210 | 0.0036 | 60.62  | 1,205,016 |
| F6_620 | Thai            | Mbuti | 0.2210 | 0.0036 | 61.08  | 1,203,523 |
| F6_620 | Surui           | Mbuti | 0.2210 | 0.0037 | 60.21  | 1,169,153 |
| F6_620 | Piapoco         | Mbuti | 0.2207 | 0.0036 | 61.11  | 1,182,349 |
| F6_620 | Mayan           | Mbuti | 0.2206 | 0.0036 | 61.28  | 1,188,183 |
| F6_620 | Kurumba         | Mbuti | 0.2204 | 0.0037 | 59.85  | 1,147,705 |
| F6_620 | Daur            | Mbuti | 0.2204 | 0.0037 | 59.41  | 1,149,476 |
| F6_620 | Even            | Mbuti | 0.2204 | 0.0036 | 60.82  | 1,232,019 |
| F6_620 | Khonda_Dora     | Mbuti | 0.2202 | 0.0037 | 59.21  | 1,148,262 |
| F6_620 | Chane           | Mbuti | 0.2201 | 0.0037 | 59.86  | 1,143,287 |
| F6_620 | Mixe            | Mbuti | 0.2201 | 0.0036 | 61.25  | 1,183,413 |
| F6_620 | Zapotec         | Mbuti | 0.2199 | 0.0036 | 61.87  | 1,190,997 |
| F6_620 | Cambodian       | Mbuti | 0.2197 | 0.0036 | 61.51  | 1,202,894 |
| F6_620 | Nahua           | Mbuti | 0.2196 | 0.0037 | 59.82  | 1,145,281 |
| F6_620 | Botocudo        | Mbuti | 0.2195 | 0.0037 | 59.77  | 1,059,982 |
| F6_620 | Itelman         | Mbuti | 0.2190 | 0.0037 | 58.78  | 1,145,492 |
| F6_620 | Quechua         | Mbuti | 0.2190 | 0.0035 | 61.89  | 1,212,610 |
| F6_620 | Kharia          | Mbuti | 0.2186 | 0.0037 | 59.77  | 1,149,294 |
| F6_620 | Bougainville    | Mbuti | 0.2182 | 0.0037 | 58.88  | 1,185,863 |
| F6_620 | Pima            | Mbuti | 0.2180 | 0.0036 | 60.17  | 1,182,167 |
| F6_620 | Altaiian        | Mbuti | 0.2180 | 0.0036 | 59.91  | 1,150,627 |
| F6_620 | Kusunda         | Mbuti | 0.2179 | 0.0035 | 61.77  | 1,194,069 |
| F6_620 | Kyrgyz          | Mbuti | 0.2175 | 0.0035 | 62.37  | 1,213,289 |
| F6_620 | Hawaiian        | Mbuti | 0.2173 | 0.0038 | 57.76  | 1,147,586 |
| F6_620 | Cree            | Mbuti | 0.2170 | 0.0035 | 62.53  | 1,207,557 |
| F6_620 | Papuan          | Mbuti | 0.2168 | 0.0037 | 59.37  | 1,263,180 |
| F6_620 | Australian      | Mbuti | 0.2166 | 0.0037 | 59.23  | 1,202,072 |
| F6_620 | Aleut           | Mbuti | 0.2165 | 0.0035 | 62.43  | 1,208,644 |
| F6_620 | Yadava          | Mbuti | 0.2160 | 0.0035 | 61.76  | 1,210,425 |
| F6_620 | Mala            | Mbuti | 0.2159 | 0.0034 | 62.85  | 1,248,835 |
| F6_620 | Mansi           | Mbuti | 0.2156 | 0.0035 | 61.28  | 1,212,531 |
| F6_620 | Chukchi         | Mbuti | 0.2149 | 0.0036 | 59.85  | 1,157,925 |
| F6_620 | Relli           | Mbuti | 0.2148 | 0.0035 | 61.23  | 1,211,822 |
| F6_620 | Tubalar         | Mbuti | 0.2147 | 0.0035 | 61.12  | 1,210,720 |
| F6_620 | Mixtec          | Mbuti | 0.2145 | 0.0035 | 61.48  | 1,200,846 |
| F6_620 | Madiga          | Mbuti | 0.2143 | 0.0035 | 61.41  | 1,212,463 |
| F6_620 | Uygur           | Mbuti | 0.2142 | 0.0034 | 62.96  | 1,218,184 |
| F6_620 | Irula           | Mbuti | 0.2142 | 0.0035 | 60.68  | 1,208,825 |
| F6_620 | Kapu            | Mbuti | 0.2137 | 0.0036 | 59.67  | 1,213,956 |
| F6_620 | Hazara          | Mbuti | 0.2136 | 0.0035 | 60.24  | 1,213,978 |
| F6_620 | Bengali         | Mbuti | 0.2131 | 0.0034 | 62.41  | 1,214,446 |

| A      | B               | C     | $f_3$  | SE     | Zscore | nsnps     |
|--------|-----------------|-------|--------|--------|--------|-----------|
| F6_620 | Punjabi         | Mbuti | 0.2124 | 0.0034 | 63.00  | 1,276,307 |
| F6_620 | Tlingit         | Mbuti | 0.2123 | 0.0034 | 61.88  | 1,213,542 |
| F6_620 | Brahmin         | Mbuti | 0.2116 | 0.0034 | 62.37  | 1,215,848 |
| F6_620 | Saami           | Mbuti | 0.2105 | 0.0035 | 59.79  | 1,211,942 |
| F6_620 | Sindhi          | Mbuti | 0.2101 | 0.0035 | 59.53  | 1,215,486 |
| F6_620 | Pathan          | Mbuti | 0.2100 | 0.0035 | 60.78  | 1,217,387 |
| F6_620 | Kashmiri_Pandit | Mbuti | 0.2096 | 0.0036 | 58.36  | 1,154,404 |
| F6_620 | Burusho         | Mbuti | 0.2094 | 0.0034 | 60.84  | 1,217,354 |
| F6_620 | Finnish         | Mbuti | 0.2090 | 0.0033 | 62.39  | 1,252,667 |
| F6_620 | Kalash          | Mbuti | 0.2087 | 0.0034 | 62.15  | 1,206,735 |
| F6_620 | Maori           | Mbuti | 0.2084 | 0.0036 | 57.58  | 1,158,963 |
| F6_620 | Icelandic       | Mbuti | 0.2080 | 0.0035 | 60.26  | 1,217,708 |
| F6_620 | Bergamo         | Mbuti | 0.2080 | 0.0036 | 57.50  | 1,156,648 |
| F6_620 | Tajik           | Mbuti | 0.2078 | 0.0034 | 60.40  | 1,214,934 |
| F6_620 | Estonian        | Mbuti | 0.2076 | 0.0035 | 58.77  | 1,217,041 |
| F6_620 | Czech           | Mbuti | 0.2074 | 0.0036 | 58.01  | 1,156,831 |
| F6_620 | Russian         | Mbuti | 0.2071 | 0.0035 | 59.55  | 1,217,844 |
| F6_620 | English         | Mbuti | 0.2069 | 0.0034 | 61.27  | 1,217,798 |
| F6_620 | French          | Mbuti | 0.2068 | 0.0034 | 61.17  | 1,216,429 |
| F6_620 | Albanian        | Mbuti | 0.2066 | 0.0035 | 59.19  | 1,155,708 |
| F6_620 | Orcadian        | Mbuti | 0.2063 | 0.0034 | 60.55  | 1,217,886 |
| F6_620 | Brahui          | Mbuti | 0.2061 | 0.0033 | 62.06  | 1,215,558 |
| F6_620 | Abkhasian       | Mbuti | 0.2060 | 0.0035 | 59.31  | 1,215,995 |
| F6_620 | Hungarian       | Mbuti | 0.2060 | 0.0035 | 59.17  | 1,218,236 |
| F6_620 | North_Ossetian  | Mbuti | 0.2054 | 0.0034 | 60.41  | 1,217,940 |
| F6_620 | Greek           | Mbuti | 0.2054 | 0.0033 | 61.71  | 1,216,650 |
| F6_620 | Adygei          | Mbuti | 0.2053 | 0.0034 | 60.15  | 1,217,032 |
| F6_620 | Iranian         | Mbuti | 0.2052 | 0.0033 | 61.46  | 1,217,134 |
| F6_620 | Armenian        | Mbuti | 0.2051 | 0.0035 | 58.82  | 1,185,190 |
| F6_620 | Polish          | Mbuti | 0.2050 | 0.0037 | 55.48  | 1,156,609 |
| F6_620 | Georgian        | Mbuti | 0.2049 | 0.0034 | 60.83  | 1,216,976 |
| F6_620 | Sardinian       | Mbuti | 0.2048 | 0.0034 | 59.42  | 1,215,977 |
| F6_620 | Balochi         | Mbuti | 0.2046 | 0.0036 | 57.22  | 1,149,984 |
| F6_620 | Bulgarian       | Mbuti | 0.2044 | 0.0033 | 62.42  | 1,218,484 |
| F6_620 | Lezgin          | Mbuti | 0.2043 | 0.0034 | 60.45  | 1,216,833 |
| F6_620 | Crete           | Mbuti | 0.2042 | 0.0035 | 57.78  | 1,156,472 |
| F6_620 | Turkish         | Mbuti | 0.2042 | 0.0034 | 59.39  | 1,217,458 |
| F6_620 | Chechen         | Mbuti | 0.2041 | 0.0035 | 58.25  | 1,156,214 |
| F6_620 | Basque          | Mbuti | 0.2040 | 0.0035 | 58.52  | 1,215,909 |
| F6_620 | Spanish         | Mbuti | 0.2037 | 0.0034 | 60.01  | 1,217,634 |
| F6_620 | Tuscan          | Mbuti | 0.2032 | 0.0035 | 58.17  | 1,218,914 |
| F6_620 | Iraqi_Jew       | Mbuti | 0.2015 | 0.0034 | 58.86  | 1,215,640 |
| F6_620 | Makrani         | Mbuti | 0.2012 | 0.0033 | 60.20  | 1,214,842 |
| F6_620 | Druze           | Mbuti | 0.2002 | 0.0033 | 60.12  | 1,216,365 |
| F6_620 | Samaritan       | Mbuti | 0.1978 | 0.0035 | 57.32  | 1,149,203 |
| F6_620 | Yeminite_Jew    | Mbuti | 0.1956 | 0.0033 | 59.10  | 1,215,229 |
| F6_620 | Jordanian       | Mbuti | 0.1955 | 0.0033 | 59.80  | 1,255,736 |
| F6_620 | BedouinB        | Mbuti | 0.1945 | 0.0033 | 59.45  | 1,209,568 |
| F6_620 | Palestinian     | Mbuti | 0.1931 | 0.0033 | 58.64  | 1,259,275 |
| F6_620 | Saharawi        | Mbuti | 0.1761 | 0.0032 | 55.63  | 1,224,879 |
| F6_620 | Mozabite        | Mbuti | 0.1718 | 0.0032 | 54.29  | 1,225,170 |
| F6_620 | Somali          | Mbuti | 0.1357 | 0.0031 | 43.32  | 1,147,736 |
| F6_620 | Masai           | Mbuti | 0.1128 | 0.0026 | 42.69  | 1,219,956 |
| F6_620 | Dinka           | Mbuti | 0.0917 | 0.0025 | 36.39  | 1,214,506 |
| F6_620 | Mandenka        | Mbuti | 0.0878 | 0.0025 | 35.51  | 1,232,569 |
| F6_620 | Gambian         | Mbuti | 0.0876 | 0.0024 | 36.70  | 1,231,938 |
| F6_620 | Luo             | Mbuti | 0.0858 | 0.0024 | 36.50  | 1,226,077 |
| F6_620 | BantuKenya      | Mbuti | 0.0850 | 0.0024 | 35.02  | 1,227,124 |
| F6_620 | Esan            | Mbuti | 0.0839 | 0.0024 | 35.13  | 1,233,222 |
| F6_620 | Luhya           | Mbuti | 0.0831 | 0.0024 | 34.36  | 1,226,634 |
| F6_620 | Yoruba          | Mbuti | 0.0825 | 0.0023 | 35.38  | 1,234,861 |
| F6_620 | Mende           | Mbuti | 0.0814 | 0.0024 | 34.17  | 1,232,278 |
| F6_620 | Igbo            | Mbuti | 0.0814 | 0.0024 | 33.87  | 1,233,141 |
| F6_620 | Lemande         | Mbuti | 0.0800 | 0.0023 | 34.17  | 1,230,077 |
| F6_620 | Kongo           | Mbuti | 0.0793 | 0.0025 | 31.84  | 1,152,001 |
| F6_620 | BantuHerero     | Mbuti | 0.0775 | 0.0023 | 33.05  | 1,226,363 |
| F6_620 | BantuTswana     | Mbuti | 0.0730 | 0.0022 | 32.97  | 1,225,213 |
| F6_620 | Biaka           | Mbuti | 0.0512 | 0.0020 | 25.97  | 1,202,579 |
| F6_620 | Ju_hoan_North   | Mbuti | 0.0480 | 0.0019 | 24.88  | 1,229,370 |
| F6_620 | Khomani_San     | Mbuti | 0.0449 | 0.0020 | 22.79  | 1,184,667 |

1012



1013 **Table S5.3 Shared genetic drift between *Bacho Kiro BB7-240* and present-day humans as**  
1014 **measured by  $f_3$ (*BB7-240*, *present-day humans*; *Mbuti*).** Present-day modern human genomes  
1015 from SGDP<sup>10</sup> were used.  $f_3$  values reported were calculated using ADMIXTOOLS<sup>3</sup> as  
1016 implemented in *admixr*<sup>9</sup> and were used for plotting Fig. S5.1B. Standard errors (SE) were  
1017 computed using a Weighted Block Jackknife<sup>3,12</sup> across all autosomes using a block size of 5Mb.  
1018 Number of SNPs overlapping among individuals reported in the column “nsnps”.

| A       | B               | C     | $f_3$  | SE     | Zscore | nsnps   |
|---------|-----------------|-------|--------|--------|--------|---------|
| BB7_240 | She             | Mbuti | 0.2286 | 0.0035 | 64.70  | 532,598 |
| BB7_240 | Ami             | Mbuti | 0.2280 | 0.0037 | 62.47  | 530,941 |
| BB7_240 | Lahu            | Mbuti | 0.2272 | 0.0036 | 62.33  | 532,013 |
| BB7_240 | Kinh            | Mbuti | 0.2265 | 0.0036 | 62.69  | 533,949 |
| BB7_240 | Yi              | Mbuti | 0.2265 | 0.0036 | 62.95  | 534,375 |
| BB7_240 | Japanese        | Mbuti | 0.2262 | 0.0035 | 64.07  | 546,821 |
| BB7_240 | Miao            | Mbuti | 0.2262 | 0.0036 | 63.43  | 533,135 |
| BB7_240 | Cambodian       | Mbuti | 0.2260 | 0.0035 | 64.29  | 534,583 |
| BB7_240 | Igorot          | Mbuti | 0.2259 | 0.0037 | 61.53  | 529,140 |
| BB7_240 | Han             | Mbuti | 0.2258 | 0.0036 | 62.94  | 533,885 |
| BB7_240 | Tujia           | Mbuti | 0.2257 | 0.0037 | 61.65  | 533,432 |
| BB7_240 | Naxi            | Mbuti | 0.2255 | 0.0036 | 62.84  | 548,346 |
| BB7_240 | Dai             | Mbuti | 0.2255 | 0.0036 | 62.12  | 546,838 |
| BB7_240 | Atayal          | Mbuti | 0.2254 | 0.0038 | 59.55  | 507,848 |
| BB7_240 | Even            | Mbuti | 0.2252 | 0.0036 | 63.44  | 548,278 |
| BB7_240 | Sherpa          | Mbuti | 0.2252 | 0.0036 | 62.53  | 531,777 |
| BB7_240 | Xibo            | Mbuti | 0.2251 | 0.0037 | 61.68  | 534,906 |
| BB7_240 | Oroqen          | Mbuti | 0.2251 | 0.0035 | 63.50  | 532,877 |
| BB7_240 | Yakut           | Mbuti | 0.2248 | 0.0037 | 61.13  | 534,349 |
| BB7_240 | Ulchi           | Mbuti | 0.2246 | 0.0036 | 62.76  | 532,736 |
| BB7_240 | Thai            | Mbuti | 0.2244 | 0.0036 | 62.33  | 535,488 |
| BB7_240 | Korean          | Mbuti | 0.2243 | 0.0035 | 63.42  | 534,120 |
| BB7_240 | Hezhen          | Mbuti | 0.2242 | 0.0036 | 62.60  | 533,450 |
| BB7_240 | Karitiana       | Mbuti | 0.2239 | 0.0037 | 60.60  | 519,356 |
| BB7_240 | Kusunda         | Mbuti | 0.2239 | 0.0035 | 64.14  | 530,584 |
| BB7_240 | Dusun           | Mbuti | 0.2238 | 0.0036 | 62.06  | 531,211 |
| BB7_240 | Eskimo_Chaplin  | Mbuti | 0.2238 | 0.0037 | 60.50  | 508,117 |
| BB7_240 | Surui           | Mbuti | 0.2238 | 0.0037 | 60.74  | 519,448 |
| BB7_240 | Tibetan         | Mbuti | 0.2238 | 0.0036 | 61.72  | 534,575 |
| BB7_240 | Tu              | Mbuti | 0.2236 | 0.0035 | 63.27  | 535,878 |
| BB7_240 | Daur            | Mbuti | 0.2236 | 0.0037 | 60.30  | 510,506 |
| BB7_240 | Burmese         | Mbuti | 0.2236 | 0.0035 | 64.01  | 536,295 |
| BB7_240 | Mayan           | Mbuti | 0.2236 | 0.0035 | 63.40  | 528,227 |
| BB7_240 | Chipewyan       | Mbuti | 0.2236 | 0.0036 | 62.13  | 526,818 |
| BB7_240 | Khonda_Dora     | Mbuti | 0.2236 | 0.0037 | 60.71  | 510,255 |
| BB7_240 | Eskimo_Sireniki | Mbuti | 0.2235 | 0.0036 | 62.76  | 531,205 |
| BB7_240 | Onge            | Mbuti | 0.2233 | 0.0037 | 60.74  | 525,377 |
| BB7_240 | Kharia          | Mbuti | 0.2232 | 0.0037 | 60.38  | 510,489 |
| BB7_240 | Piapoco         | Mbuti | 0.2230 | 0.0036 | 62.35  | 525,552 |
| BB7_240 | Botocudo        | Mbuti | 0.2229 | 0.0037 | 60.19  | 481,609 |
| BB7_240 | Zapotec         | Mbuti | 0.2228 | 0.0035 | 62.88  | 529,419 |
| BB7_240 | Eskimo_Naukan   | Mbuti | 0.2228 | 0.0036 | 62.62  | 528,993 |
| BB7_240 | Itelman         | Mbuti | 0.2225 | 0.0037 | 59.88  | 508,865 |
| BB7_240 | Hawaiian        | Mbuti | 0.2218 | 0.0036 | 61.44  | 509,840 |
| BB7_240 | Chane           | Mbuti | 0.2216 | 0.0038 | 59.10  | 507,933 |
| BB7_240 | Mixe            | Mbuti | 0.2214 | 0.0036 | 61.76  | 525,871 |
| BB7_240 | Quechua         | Mbuti | 0.2214 | 0.0035 | 62.43  | 539,236 |
| BB7_240 | Altaiian        | Mbuti | 0.2213 | 0.0037 | 59.32  | 511,563 |
| BB7_240 | Kurumba         | Mbuti | 0.2212 | 0.0036 | 61.24  | 509,836 |
| BB7_240 | Kyrgyz          | Mbuti | 0.2210 | 0.0035 | 63.18  | 539,507 |
| BB7_240 | Australian      | Mbuti | 0.2209 | 0.0037 | 59.53  | 534,341 |
| BB7_240 | Nahua           | Mbuti | 0.2208 | 0.0036 | 61.25  | 508,891 |
| BB7_240 | Pima            | Mbuti | 0.2208 | 0.0036 | 61.29  | 525,609 |
| BB7_240 | Cree            | Mbuti | 0.2206 | 0.0035 | 62.68  | 537,258 |
| BB7_240 | Tubalar         | Mbuti | 0.2205 | 0.0035 | 62.52  | 538,596 |
| BB7_240 | Mala            | Mbuti | 0.2194 | 0.0034 | 64.69  | 555,568 |
| BB7_240 | Kapu            | Mbuti | 0.2192 | 0.0035 | 62.36  | 539,529 |
| BB7_240 | Papuan          | Mbuti | 0.2190 | 0.0037 | 59.85  | 562,780 |
| BB7_240 | Mansi           | Mbuti | 0.2189 | 0.0035 | 61.96  | 539,466 |
| BB7_240 | Madiga          | Mbuti | 0.2188 | 0.0035 | 62.68  | 539,210 |
| BB7_240 | Aleut           | Mbuti | 0.2188 | 0.0035 | 62.03  | 537,617 |
| BB7_240 | Hazara          | Mbuti | 0.2186 | 0.0035 | 62.77  | 539,936 |
| BB7_240 | Bougainville    | Mbuti | 0.2186 | 0.0036 | 61.20  | 527,796 |
| BB7_240 | Irula           | Mbuti | 0.2185 | 0.0034 | 63.45  | 537,545 |
| BB7_240 | Yadava          | Mbuti | 0.2185 | 0.0034 | 63.64  | 538,491 |
| BB7_240 | Chukchi         | Mbuti | 0.2184 | 0.0035 | 61.68  | 514,377 |
| BB7_240 | Mixtec          | Mbuti | 0.2175 | 0.0035 | 62.58  | 534,136 |
| BB7_240 | Relli           | Mbuti | 0.2172 | 0.0034 | 63.44  | 538,987 |
| BB7_240 | Bengali         | Mbuti | 0.2171 | 0.0034 | 63.32  | 540,042 |
| BB7_240 | Uyгур           | Mbuti | 0.2167 | 0.0035 | 61.07  | 542,257 |

| A       | B               | C     | $f_3$  | SE     | Zscore | nsnps   |
|---------|-----------------|-------|--------|--------|--------|---------|
| BB7_240 | Tlingit         | Mbuti | 0.2167 | 0.0035 | 62.57  | 540,128 |
| BB7_240 | Punjabi         | Mbuti | 0.2164 | 0.0034 | 63.89  | 568,585 |
| BB7_240 | Pathan          | Mbuti | 0.2151 | 0.0034 | 62.67  | 541,520 |
| BB7_240 | Brahmin         | Mbuti | 0.2150 | 0.0034 | 63.13  | 540,905 |
| BB7_240 | Burusho         | Mbuti | 0.2147 | 0.0034 | 62.59  | 541,528 |
| BB7_240 | Sindhi          | Mbuti | 0.2143 | 0.0035 | 61.50  | 540,375 |
| BB7_240 | Saami           | Mbuti | 0.2141 | 0.0035 | 60.60  | 539,338 |
| BB7_240 | Czech           | Mbuti | 0.2141 | 0.0036 | 59.81  | 513,798 |
| BB7_240 | Icelandic       | Mbuti | 0.2132 | 0.0035 | 60.75  | 541,774 |
| BB7_240 | Kashmiri_Pandit | Mbuti | 0.2127 | 0.0035 | 60.30  | 512,650 |
| BB7_240 | Russian         | Mbuti | 0.2124 | 0.0034 | 62.23  | 541,749 |
| BB7_240 | Tajik           | Mbuti | 0.2122 | 0.0035 | 61.28  | 540,555 |
| BB7_240 | Kalash          | Mbuti | 0.2121 | 0.0034 | 61.88  | 536,812 |
| BB7_240 | Finnish         | Mbuti | 0.2112 | 0.0034 | 62.80  | 558,414 |
| BB7_240 | Orcadian        | Mbuti | 0.2112 | 0.0035 | 60.95  | 542,056 |
| BB7_240 | Maori           | Mbuti | 0.2111 | 0.0034 | 62.83  | 515,289 |
| BB7_240 | French          | Mbuti | 0.2110 | 0.0034 | 62.27  | 541,241 |
| BB7_240 | Bergamo         | Mbuti | 0.2109 | 0.0036 | 59.23  | 513,789 |
| BB7_240 | Estonian        | Mbuti | 0.2108 | 0.0035 | 59.94  | 541,818 |
| BB7_240 | Greek           | Mbuti | 0.2107 | 0.0034 | 62.23  | 541,395 |
| BB7_240 | Albanian        | Mbuti | 0.2100 | 0.0035 | 60.47  | 513,904 |
| BB7_240 | North_Ossetian  | Mbuti | 0.2095 | 0.0033 | 62.79  | 541,984 |
| BB7_240 | English         | Mbuti | 0.2095 | 0.0034 | 62.46  | 541,896 |
| BB7_240 | Polish          | Mbuti | 0.2094 | 0.0035 | 59.38  | 514,290 |
| BB7_240 | Basque          | Mbuti | 0.2093 | 0.0034 | 61.10  | 541,124 |
| BB7_240 | Adygei          | Mbuti | 0.2091 | 0.0033 | 63.40  | 541,777 |
| BB7_240 | Brahui          | Mbuti | 0.2091 | 0.0034 | 62.08  | 540,608 |
| BB7_240 | Hungarian       | Mbuti | 0.2090 | 0.0034 | 61.16  | 542,362 |
| BB7_240 | Sardinian       | Mbuti | 0.2086 | 0.0033 | 62.55  | 540,702 |
| BB7_240 | Balochi         | Mbuti | 0.2086 | 0.0036 | 57.35  | 510,826 |
| BB7_240 | Tuscan          | Mbuti | 0.2085 | 0.0034 | 60.75  | 542,235 |
| BB7_240 | Bulgarian       | Mbuti | 0.2082 | 0.0034 | 60.36  | 542,292 |
| BB7_240 | Turkish         | Mbuti | 0.2079 | 0.0034 | 60.97  | 541,696 |
| BB7_240 | Spanish         | Mbuti | 0.2079 | 0.0034 | 61.08  | 541,883 |
| BB7_240 | Abkhasian       | Mbuti | 0.2075 | 0.0034 | 60.32  | 541,142 |
| BB7_240 | Lezgin          | Mbuti | 0.2074 | 0.0034 | 61.72  | 541,771 |
| BB7_240 | Chechen         | Mbuti | 0.2073 | 0.0035 | 59.06  | 513,663 |
| BB7_240 | Crete           | Mbuti | 0.2066 | 0.0036 | 58.05  | 513,898 |
| BB7_240 | Georgian        | Mbuti | 0.2064 | 0.0034 | 61.50  | 541,603 |
| BB7_240 | Armenian        | Mbuti | 0.2063 | 0.0034 | 60.61  | 526,973 |
| BB7_240 | Iranian         | Mbuti | 0.2047 | 0.0034 | 60.78  | 541,863 |
| BB7_240 | Makrani         | Mbuti | 0.2046 | 0.0034 | 61.05  | 540,505 |
| BB7_240 | Iraqi_Jew       | Mbuti | 0.2031 | 0.0033 | 62.44  | 541,085 |
| BB7_240 | Druze           | Mbuti | 0.2013 | 0.0033 | 60.95  | 541,580 |
| BB7_240 | Samaritan       | Mbuti | 0.2012 | 0.0035 | 57.90  | 510,297 |
| BB7_240 | BedouinB        | Mbuti | 0.1999 | 0.0033 | 60.60  | 537,914 |
| BB7_240 | Yemenite_Jew    | Mbuti | 0.1980 | 0.0034 | 58.47  | 540,581 |
| BB7_240 | Palestinian     | Mbuti | 0.1979 | 0.0033 | 59.95  | 560,334 |
| BB7_240 | Jordanian       | Mbuti | 0.1979 | 0.0033 | 59.69  | 558,898 |
| BB7_240 | Saharawi        | Mbuti | 0.1793 | 0.0032 | 56.54  | 544,487 |
| BB7_240 | Mozabite        | Mbuti | 0.1766 | 0.0032 | 55.40  | 544,187 |
| BB7_240 | Somali          | Mbuti | 0.1358 | 0.0031 | 43.87  | 509,538 |
| BB7_240 | Masai           | Mbuti | 0.1127 | 0.0026 | 42.72  | 541,153 |
| BB7_240 | Dinka           | Mbuti | 0.0917 | 0.0025 | 36.50  | 537,784 |
| BB7_240 | Mandenka        | Mbuti | 0.0878 | 0.0025 | 35.18  | 545,374 |
| BB7_240 | Gambian         | Mbuti | 0.0871 | 0.0024 | 36.08  | 544,833 |
| BB7_240 | Luo             | Mbuti | 0.0867 | 0.0025 | 34.61  | 542,610 |
| BB7_240 | BantuKenya      | Mbuti | 0.0854 | 0.0025 | 34.85  | 542,758 |
| BB7_240 | Luhya           | Mbuti | 0.0842 | 0.0024 | 34.88  | 542,410 |
| BB7_240 | Yoruba          | Mbuti | 0.0839 | 0.0024 | 35.30  | 546,023 |
| BB7_240 | Esan            | Mbuti | 0.0832 | 0.0024 | 34.42  | 545,266 |
| BB7_240 | Igbo            | Mbuti | 0.0821 | 0.0025 | 33.42  | 544,689 |
| BB7_240 | Mende           | Mbuti | 0.0818 | 0.0024 | 33.54  | 544,878 |
| BB7_240 | Lemarde         | Mbuti | 0.0809 | 0.0024 | 33.07  | 543,905 |
| BB7_240 | Kongo           | Mbuti | 0.0804 | 0.0025 | 32.18  | 509,798 |
| BB7_240 | BantuHerero     | Mbuti | 0.0781 | 0.0024 | 33.03  | 542,214 |
| BB7_240 | BantuTswana     | Mbuti | 0.0725 | 0.0022 | 32.28  | 542,733 |
| BB7_240 | Biaka           | Mbuti | 0.0522 | 0.0020 | 26.08  | 532,391 |
| BB7_240 | Ju_hoan_North   | Mbuti | 0.0470 | 0.0019 | 24.62  | 546,805 |
| BB7_240 | Khomani_San     | Mbuti | 0.0443 | 0.0019 | 22.77  | 526,124 |

1019

1020 **Table S5.4 Shared genetic drift between *Bacho Kiro CC7-335* and present-day humans as**  
 1021 **measured by  $f_3(CC7-335, \textit{present-day humans}; \textit{Mbuti})$ .** Present-day modern human genomes  
 1022 from SGPDP<sup>10</sup> were used.  $f_3$  values reported were calculated using ADMIXTOOLS<sup>3</sup> as  
 1023 implemented in *admixr*<sup>9</sup> and were used for plotting Fig. S5.1C. Standard errors (SE) were  
 1024 computed using a Weighted Block Jackknife<sup>3,12</sup> across all autosomes using a block size of 5Mb.  
 1025 Number of SNPs overlapping among individuals reported in the column “nsnps”.

| A       | B               | C     | $f_3$  | SE     | Zscore | nsnps   |
|---------|-----------------|-------|--------|--------|--------|---------|
| CC7_335 | Lahu            | Mbuti | 0.2250 | 0.0037 | 60.37  | 486,320 |
| CC7_335 | Oroqen          | Mbuti | 0.2248 | 0.0038 | 59.38  | 487,060 |
| CC7_335 | Ulchi           | Mbuti | 0.2242 | 0.0037 | 61.25  | 486,763 |
| CC7_335 | Han             | Mbuti | 0.2241 | 0.0038 | 59.09  | 487,752 |
| CC7_335 | Daur            | Mbuti | 0.2241 | 0.0039 | 57.08  | 466,483 |
| CC7_335 | Yi              | Mbuti | 0.2241 | 0.0038 | 58.86  | 487,903 |
| CC7_335 | Eskimo_Naukan   | Mbuti | 0.2239 | 0.0037 | 60.82  | 483,473 |
| CC7_335 | Japanese        | Mbuti | 0.2239 | 0.0037 | 60.07  | 499,886 |
| CC7_335 | Itelman         | Mbuti | 0.2239 | 0.0039 | 57.51  | 464,834 |
| CC7_335 | Surui           | Mbuti | 0.2238 | 0.0038 | 58.80  | 474,876 |
| CC7_335 | Even            | Mbuti | 0.2238 | 0.0038 | 59.09  | 501,167 |
| CC7_335 | Ami             | Mbuti | 0.2237 | 0.0037 | 60.26  | 485,326 |
| CC7_335 | Dusun           | Mbuti | 0.2234 | 0.0038 | 59.55  | 485,207 |
| CC7_335 | Khonda_Dora     | Mbuti | 0.2234 | 0.0038 | 58.78  | 466,143 |
| CC7_335 | Eskimo_Chaplin  | Mbuti | 0.2233 | 0.0038 | 58.02  | 464,589 |
| CC7_335 | Hezhen          | Mbuti | 0.2233 | 0.0038 | 58.93  | 487,762 |
| CC7_335 | Dai             | Mbuti | 0.2233 | 0.0037 | 60.28  | 499,888 |
| CC7_335 | Korean          | Mbuti | 0.2232 | 0.0037 | 59.94  | 488,017 |
| CC7_335 | Burmese         | Mbuti | 0.2232 | 0.0037 | 60.17  | 490,199 |
| CC7_335 | Karitiana       | Mbuti | 0.2231 | 0.0039 | 57.47  | 474,521 |
| CC7_335 | Igorot          | Mbuti | 0.2231 | 0.0038 | 58.39  | 483,610 |
| CC7_335 | Kinh            | Mbuti | 0.2230 | 0.0038 | 59.38  | 488,238 |
| CC7_335 | Sherpa          | Mbuti | 0.2229 | 0.0037 | 60.56  | 486,096 |
| CC7_335 | Cambodian       | Mbuti | 0.2229 | 0.0037 | 59.48  | 488,908 |
| CC7_335 | Onge            | Mbuti | 0.2229 | 0.0036 | 61.47  | 480,136 |
| CC7_335 | Chipewyan       | Mbuti | 0.2228 | 0.0038 | 58.93  | 481,723 |
| CC7_335 | Naxi            | Mbuti | 0.2228 | 0.0037 | 59.92  | 501,277 |
| CC7_335 | Thai            | Mbuti | 0.2228 | 0.0037 | 60.36  | 489,285 |
| CC7_335 | Tujia           | Mbuti | 0.2227 | 0.0038 | 59.31  | 487,384 |
| CC7_335 | Miao            | Mbuti | 0.2226 | 0.0037 | 60.19  | 487,206 |
| CC7_335 | Yakut           | Mbuti | 0.2225 | 0.0038 | 58.87  | 488,441 |
| CC7_335 | Tibetan         | Mbuti | 0.2223 | 0.0037 | 60.17  | 488,222 |
| CC7_335 | Tu              | Mbuti | 0.2221 | 0.0038 | 58.85  | 489,983 |
| CC7_335 | She             | Mbuti | 0.2221 | 0.0037 | 59.30  | 487,033 |
| CC7_335 | Kusunda         | Mbuti | 0.2220 | 0.0036 | 61.33  | 485,064 |
| CC7_335 | Botocudo        | Mbuti | 0.2217 | 0.0039 | 57.47  | 440,853 |
| CC7_335 | Mayan           | Mbuti | 0.2215 | 0.0037 | 59.90  | 483,026 |
| CC7_335 | Kurumba         | Mbuti | 0.2214 | 0.0037 | 59.91  | 465,616 |
| CC7_335 | Atayal          | Mbuti | 0.2213 | 0.0038 | 57.88  | 464,424 |
| CC7_335 | Eskimo_Sireniki | Mbuti | 0.2212 | 0.0036 | 61.99  | 485,676 |
| CC7_335 | Zapotec         | Mbuti | 0.2210 | 0.0037 | 60.29  | 483,828 |
| CC7_335 | Xibo            | Mbuti | 0.2210 | 0.0038 | 58.77  | 488,834 |
| CC7_335 | Chane           | Mbuti | 0.2208 | 0.0037 | 60.19  | 464,254 |
| CC7_335 | Cree            | Mbuti | 0.2207 | 0.0036 | 62.05  | 490,741 |
| CC7_335 | Kyrgyz          | Mbuti | 0.2207 | 0.0037 | 59.69  | 493,250 |
| CC7_335 | Mixe            | Mbuti | 0.2204 | 0.0038 | 58.49  | 480,981 |
| CC7_335 | Yadava          | Mbuti | 0.2201 | 0.0036 | 60.73  | 491,886 |
| CC7_335 | Hawaiian        | Mbuti | 0.2201 | 0.0040 | 54.83  | 465,927 |
| CC7_335 | Piapoco         | Mbuti | 0.2198 | 0.0036 | 60.62  | 480,561 |
| CC7_335 | Quechua         | Mbuti | 0.2195 | 0.0036 | 60.66  | 492,928 |
| CC7_335 | Kharia          | Mbuti | 0.2194 | 0.0037 | 59.73  | 466,848 |
| CC7_335 | Madiga          | Mbuti | 0.2194 | 0.0037 | 60.09  | 492,548 |
| CC7_335 | Aleut           | Mbuti | 0.2193 | 0.0037 | 60.04  | 491,282 |
| CC7_335 | Pima            | Mbuti | 0.2191 | 0.0038 | 58.23  | 480,344 |
| CC7_335 | Bougainville    | Mbuti | 0.2191 | 0.0036 | 60.08  | 481,995 |
| CC7_335 | Nahua           | Mbuti | 0.2187 | 0.0038 | 57.52  | 465,105 |
| CC7_335 | Chukchi         | Mbuti | 0.2187 | 0.0036 | 60.12  | 470,182 |
| CC7_335 | Tubalar         | Mbuti | 0.2180 | 0.0036 | 60.01  | 492,383 |
| CC7_335 | Irula           | Mbuti | 0.2179 | 0.0035 | 61.81  | 491,403 |
| CC7_335 | Altaiian        | Mbuti | 0.2178 | 0.0038 | 57.02  | 467,186 |
| CC7_335 | Mala            | Mbuti | 0.2177 | 0.0035 | 62.04  | 507,743 |
| CC7_335 | Papuan          | Mbuti | 0.2176 | 0.0037 | 59.10  | 514,723 |
| CC7_335 | Hazara          | Mbuti | 0.2171 | 0.0037 | 59.10  | 493,262 |
| CC7_335 | Punjabi         | Mbuti | 0.2171 | 0.0035 | 61.22  | 519,396 |
| CC7_335 | Kapu            | Mbuti | 0.2170 | 0.0036 | 60.06  | 493,356 |
| CC7_335 | Mansi           | Mbuti | 0.2167 | 0.0035 | 61.38  | 492,953 |
| CC7_335 | Relli           | Mbuti | 0.2165 | 0.0035 | 61.74  | 492,801 |
| CC7_335 | Mixtec          | Mbuti | 0.2164 | 0.0037 | 58.81  | 487,871 |
| CC7_335 | Bengali         | Mbuti | 0.2163 | 0.0035 | 61.12  | 493,518 |
| CC7_335 | Uyгур           | Mbuti | 0.2156 | 0.0035 | 61.47  | 495,209 |

| A       | B               | C     | $f_3$  | SE     | Zscore | nsnps   |
|---------|-----------------|-------|--------|--------|--------|---------|
| CC7_335 | Tlingit         | Mbuti | 0.2154 | 0.0036 | 59.30  | 493,493 |
| CC7_335 | Australian      | Mbuti | 0.2152 | 0.0037 | 57.45  | 488,597 |
| CC7_335 | Sindhi          | Mbuti | 0.2145 | 0.0036 | 59.95  | 493,942 |
| CC7_335 | Burusho         | Mbuti | 0.2141 | 0.0036 | 60.27  | 494,720 |
| CC7_335 | Saami           | Mbuti | 0.2139 | 0.0036 | 58.88  | 492,664 |
| CC7_335 | Brahmin         | Mbuti | 0.2135 | 0.0035 | 60.66  | 494,553 |
| CC7_335 | Estonian        | Mbuti | 0.2131 | 0.0036 | 59.32  | 494,602 |
| CC7_335 | Kashmiri_Pandit | Mbuti | 0.2129 | 0.0037 | 58.25  | 468,262 |
| CC7_335 | Russian         | Mbuti | 0.2124 | 0.0036 | 58.26  | 495,113 |
| CC7_335 | Czech           | Mbuti | 0.2124 | 0.0037 | 57.21  | 469,531 |
| CC7_335 | Pathan          | Mbuti | 0.2124 | 0.0035 | 60.25  | 494,836 |
| CC7_335 | Finnish         | Mbuti | 0.2123 | 0.0035 | 60.59  | 509,846 |
| CC7_335 | Icelandic       | Mbuti | 0.2122 | 0.0035 | 59.80  | 494,918 |
| CC7_335 | Maori           | Mbuti | 0.2117 | 0.0036 | 58.12  | 470,475 |
| CC7_335 | Polish          | Mbuti | 0.2112 | 0.0037 | 56.84  | 469,527 |
| CC7_335 | Orcadian        | Mbuti | 0.2110 | 0.0035 | 60.69  | 494,892 |
| CC7_335 | Tajik           | Mbuti | 0.2109 | 0.0035 | 60.04  | 494,050 |
| CC7_335 | Basque          | Mbuti | 0.2107 | 0.0035 | 59.80  | 493,880 |
| CC7_335 | Kalash          | Mbuti | 0.2104 | 0.0035 | 60.01  | 490,352 |
| CC7_335 | French          | Mbuti | 0.2103 | 0.0036 | 57.89  | 494,422 |
| CC7_335 | Albanian        | Mbuti | 0.2102 | 0.0036 | 58.66  | 469,393 |
| CC7_335 | Balochi         | Mbuti | 0.2102 | 0.0038 | 54.93  | 466,571 |
| CC7_335 | English         | Mbuti | 0.2100 | 0.0035 | 60.15  | 494,908 |
| CC7_335 | Bulgarian       | Mbuti | 0.2100 | 0.0036 | 59.15  | 495,201 |
| CC7_335 | Bergamo         | Mbuti | 0.2099 | 0.0038 | 54.73  | 469,393 |
| CC7_335 | Hungarian       | Mbuti | 0.2098 | 0.0037 | 57.31  | 495,273 |
| CC7_335 | Chechen         | Mbuti | 0.2097 | 0.0037 | 57.25  | 469,420 |
| CC7_335 | Adygei          | Mbuti | 0.2096 | 0.0035 | 59.34  | 494,760 |
| CC7_335 | Greek           | Mbuti | 0.2094 | 0.0036 | 58.78  | 494,448 |
| CC7_335 | Armenian        | Mbuti | 0.2094 | 0.0036 | 58.53  | 481,404 |
| CC7_335 | Turkish         | Mbuti | 0.2094 | 0.0036 | 58.23  | 494,654 |
| CC7_335 | Sardinian       | Mbuti | 0.2093 | 0.0035 | 60.16  | 494,116 |
| CC7_335 | North_Ossetian  | Mbuti | 0.2091 | 0.0035 | 59.35  | 495,272 |
| CC7_335 | Abkhasian       | Mbuti | 0.2091 | 0.0036 | 58.31  | 494,457 |
| CC7_335 | Tuscan          | Mbuti | 0.2087 | 0.0035 | 58.91  | 495,405 |
| CC7_335 | Brahui          | Mbuti | 0.2087 | 0.0035 | 59.17  | 494,007 |
| CC7_335 | Spanish         | Mbuti | 0.2086 | 0.0035 | 59.09  | 494,911 |
| CC7_335 | Lezgin          | Mbuti | 0.2082 | 0.0035 | 59.41  | 494,705 |
| CC7_335 | Iranian         | Mbuti | 0.2077 | 0.0034 | 60.58  | 494,963 |
| CC7_335 | Georgian        | Mbuti | 0.2071 | 0.0035 | 58.97  | 494,680 |
| CC7_335 | Crete           | Mbuti | 0.2067 | 0.0037 | 55.52  | 469,833 |
| CC7_335 | Iraqi_Jew       | Mbuti | 0.2057 | 0.0034 | 60.23  | 493,625 |
| CC7_335 | Makrani         | Mbuti | 0.2054 | 0.0036 | 56.84  | 493,589 |
| CC7_335 | Samaritan       | Mbuti | 0.2044 | 0.0036 | 57.12  | 466,236 |
| CC7_335 | Druze           | Mbuti | 0.2031 | 0.0034 | 59.06  | 494,414 |
| CC7_335 | BedouinB        | Mbuti | 0.1997 | 0.0034 | 58.65  | 491,331 |
| CC7_335 | Yemenite_Jew    | Mbuti | 0.1994 | 0.0035 | 57.73  | 494,009 |
| CC7_335 | Jordanian       | Mbuti | 0.1977 | 0.0034 | 57.95  | 510,776 |
| CC7_335 | Palestinian     | Mbuti | 0.1970 | 0.0034 | 57.63  | 511,746 |
| CC7_335 | Saharawi        | Mbuti | 0.1795 | 0.0032 | 56.60  | 497,555 |
| CC7_335 | Mozabite        | Mbuti | 0.1772 | 0.0033 | 54.01  | 497,130 |
| CC7_335 | Somali          | Mbuti | 0.1381 | 0.0032 | 42.53  | 465,274 |
| CC7_335 | Masai           | Mbuti | 0.1139 | 0.0028 | 41.01  | 494,670 |
| CC7_335 | Dinka           | Mbuti | 0.0920 | 0.0026 | 35.62  | 491,883 |
| CC7_335 | Gambian         | Mbuti | 0.0880 | 0.0025 | 35.23  | 498,645 |
| CC7_335 | Mandenka        | Mbuti | 0.0873 | 0.0025 | 34.68  | 499,105 |
| CC7_335 | Luo             | Mbuti | 0.0865 | 0.0025 | 34.21  | 496,230 |
| CC7_335 | BantuKenya      | Mbuti | 0.0861 | 0.0026 | 33.57  | 496,815 |
| CC7_335 | Luhya           | Mbuti | 0.0859 | 0.0026 | 33.03  | 496,498 |
| CC7_335 | Esan            | Mbuti | 0.0842 | 0.0025 | 33.07  | 499,118 |
| CC7_335 | Yoruba          | Mbuti | 0.0836 | 0.0025 | 34.06  | 499,368 |
| CC7_335 | Mende           | Mbuti | 0.0833 | 0.0025 | 33.98  | 498,637 |
| CC7_335 | Igbo            | Mbuti | 0.0828 | 0.0025 | 33.31  | 498,676 |
| CC7_335 | Lemande         | Mbuti | 0.0818 | 0.0025 | 33.17  | 497,854 |
| CC7_335 | BantuHerero     | Mbuti | 0.0790 | 0.0025 | 32.15  | 496,294 |
| CC7_335 | Kongo           | Mbuti | 0.0781 | 0.0026 | 29.96  | 466,479 |
| CC7_335 | BantuTswana     | Mbuti | 0.0728 | 0.0024 | 30.98  | 496,443 |
| CC7_335 | Biaka           | Mbuti | 0.0521 | 0.0021 | 24.88  | 487,451 |
| CC7_335 | Ju_hoan_North   | Mbuti | 0.0478 | 0.0020 | 23.36  | 500,322 |
| CC7_335 | Khomani_San     | Mbuti | 0.0455 | 0.0021 | 21.71  | 481,422 |

1026

1027 **Table S5.5 Shared genetic drift between *Bacho Kiro BK1653* and present-day humans as**  
 1028 **measured by  $f_3$ (*BK1653*, *present-day humans*; *Mbuti*).** Present-day modern human genomes  
 1029 from SGPDP<sup>10</sup> were used.  $f_3$  values reported were calculated using ADMIXTOOLS<sup>3</sup> as  
 1030 implemented in *admixr*<sup>9</sup> and were used for plotting Extended Data Fig. 3B. Standard errors  
 1031 (SE) were computed using a Weighted Block Jackknife<sup>3,12</sup> across all autosomes using a block  
 1032 size of 5Mb. Number of SNPs overlapping among individuals reported in the column “nsnps”.

| A      | B               | C     | $f_3$  | stderr | Zscore | nsnps   |
|--------|-----------------|-------|--------|--------|--------|---------|
| BK1653 | Icelandic       | Mbuti | 0.2412 | 0.0035 | 68.12  | 567,146 |
| BK1653 | Czech           | Mbuti | 0.2403 | 0.0036 | 66.79  | 538,697 |
| BK1653 | Estonian        | Mbuti | 0.2393 | 0.0036 | 65.99  | 566,739 |
| BK1653 | Finnish         | Mbuti | 0.2389 | 0.0034 | 70.63  | 583,875 |
| BK1653 | English         | Mbuti | 0.2386 | 0.0036 | 67.21  | 567,076 |
| BK1653 | Orcadian        | Mbuti | 0.2381 | 0.0035 | 67.77  | 567,147 |
| BK1653 | French          | Mbuti | 0.2381 | 0.0035 | 67.21  | 566,370 |
| BK1653 | Basque          | Mbuti | 0.2378 | 0.0035 | 67.82  | 566,063 |
| BK1653 | Sardinian       | Mbuti | 0.2378 | 0.0035 | 68.44  | 565,999 |
| BK1653 | Saami           | Mbuti | 0.2375 | 0.0036 | 65.92  | 565,404 |
| BK1653 | Hungarian       | Mbuti | 0.2373 | 0.0036 | 66.05  | 567,453 |
| BK1653 | Bergamo         | Mbuti | 0.2372 | 0.0036 | 65.37  | 538,614 |
| BK1653 | Spanish         | Mbuti | 0.2372 | 0.0036 | 66.37  | 567,155 |
| BK1653 | Russian         | Mbuti | 0.2350 | 0.0035 | 68.10  | 567,223 |
| BK1653 | Bulgarian       | Mbuti | 0.2349 | 0.0035 | 67.96  | 568,141 |
| BK1653 | Greek           | Mbuti | 0.2349 | 0.0034 | 68.13  | 566,767 |
| BK1653 | Crete           | Mbuti | 0.2345 | 0.0038 | 62.05  | 538,818 |
| BK1653 | Polish          | Mbuti | 0.2344 | 0.0037 | 64.15  | 539,127 |
| BK1653 | Tuscan          | Mbuti | 0.2332 | 0.0036 | 65.01  | 567,863 |
| BK1653 | Albanian        | Mbuti | 0.2329 | 0.0036 | 64.67  | 538,698 |
| BK1653 | Adygei          | Mbuti | 0.2322 | 0.0035 | 66.21  | 567,075 |
| BK1653 | Chukchi         | Mbuti | 0.2319 | 0.0036 | 64.70  | 540,554 |
| BK1653 | Abkhasian       | Mbuti | 0.2306 | 0.0035 | 65.28  | 567,007 |
| BK1653 | Georgian        | Mbuti | 0.2303 | 0.0034 | 67.08  | 566,996 |
| BK1653 | North_Ossetian  | Mbuti | 0.2301 | 0.0035 | 65.31  | 568,126 |
| BK1653 | Tajik           | Mbuti | 0.2299 | 0.0035 | 65.45  | 566,732 |
| BK1653 | Mansi           | Mbuti | 0.2299 | 0.0035 | 65.76  | 566,474 |
| BK1653 | Cree            | Mbuti | 0.2297 | 0.0035 | 65.18  | 564,306 |
| BK1653 | Chechen         | Mbuti | 0.2296 | 0.0036 | 63.23  | 539,041 |
| BK1653 | Lezgin          | Mbuti | 0.2294 | 0.0035 | 66.37  | 567,006 |
| BK1653 | Tlingit         | Mbuti | 0.2289 | 0.0035 | 65.97  | 566,773 |
| BK1653 | Pathan          | Mbuti | 0.2281 | 0.0035 | 65.70  | 568,261 |
| BK1653 | Aleut           | Mbuti | 0.2277 | 0.0035 | 65.13  | 564,802 |
| BK1653 | Turkish         | Mbuti | 0.2276 | 0.0034 | 66.27  | 567,643 |
| BK1653 | Armenian        | Mbuti | 0.2274 | 0.0037 | 61.95  | 552,929 |
| BK1653 | Chipekwan       | Mbuti | 0.2271 | 0.0036 | 63.00  | 554,621 |
| BK1653 | Chane           | Mbuti | 0.2261 | 0.0038 | 59.84  | 534,539 |
| BK1653 | Iranian         | Mbuti | 0.2261 | 0.0035 | 64.82  | 567,592 |
| BK1653 | Druze           | Mbuti | 0.2261 | 0.0033 | 67.56  | 567,073 |
| BK1653 | Mayan           | Mbuti | 0.2261 | 0.0035 | 63.76  | 555,908 |
| BK1653 | Kashmiri_Pandit | Mbuti | 0.2261 | 0.0036 | 63.28  | 538,491 |
| BK1653 | Surui           | Mbuti | 0.2260 | 0.0037 | 61.07  | 546,837 |
| BK1653 | Iraqi_Jew       | Mbuti | 0.2259 | 0.0035 | 64.52  | 566,698 |
| BK1653 | Burusho         | Mbuti | 0.2255 | 0.0035 | 64.29  | 568,480 |
| BK1653 | Tubalar         | Mbuti | 0.2253 | 0.0035 | 64.61  | 566,190 |
| BK1653 | Quechua         | Mbuti | 0.2252 | 0.0036 | 62.57  | 567,153 |
| BK1653 | Prima           | Mbuti | 0.2250 | 0.0035 | 63.52  | 552,950 |
| BK1653 | Kalash          | Mbuti | 0.2250 | 0.0035 | 65.17  | 563,325 |
| BK1653 | Piapoco         | Mbuti | 0.2249 | 0.0037 | 61.35  | 553,043 |
| BK1653 | Zapotec         | Mbuti | 0.2249 | 0.0036 | 63.05  | 557,066 |
| BK1653 | Nahua           | Mbuti | 0.2247 | 0.0037 | 60.68  | 535,895 |
| BK1653 | Karitiana       | Mbuti | 0.2247 | 0.0037 | 61.41  | 546,931 |
| BK1653 | Kyrgyz          | Mbuti | 0.2246 | 0.0034 | 66.06  | 567,611 |
| BK1653 | Eskimo_Naukan   | Mbuti | 0.2246 | 0.0035 | 64.56  | 556,829 |
| BK1653 | Samaritan       | Mbuti | 0.2245 | 0.0038 | 59.79  | 535,337 |
| BK1653 | Maori           | Mbuti | 0.2243 | 0.0037 | 60.96  | 541,257 |
| BK1653 | Eskimo_Chaplin  | Mbuti | 0.2242 | 0.0038 | 59.11  | 535,586 |
| BK1653 | Hazara          | Mbuti | 0.2242 | 0.0035 | 64.62  | 567,606 |
| BK1653 | Brahmin         | Mbuti | 0.2241 | 0.0034 | 66.08  | 567,961 |
| BK1653 | Sindhi          | Mbuti | 0.2240 | 0.0035 | 64.19  | 567,568 |
| BK1653 | Itelman         | Mbuti | 0.2240 | 0.0036 | 62.20  | 535,848 |
| BK1653 | Mixtec          | Mbuti | 0.2239 | 0.0035 | 63.89  | 561,248 |
| BK1653 | Altaian         | Mbuti | 0.2237 | 0.0036 | 62.72  | 538,383 |
| BK1653 | Punjabi         | Mbuti | 0.2237 | 0.0033 | 66.79  | 596,704 |
| BK1653 | Balochi         | Mbuti | 0.2234 | 0.0037 | 60.66  | 536,702 |
| BK1653 | Mixe            | Mbuti | 0.2234 | 0.0036 | 61.52  | 553,752 |
| BK1653 | Yygur           | Mbuti | 0.2229 | 0.0035 | 64.40  | 569,437 |
| BK1653 | Brahui          | Mbuti | 0.2229 | 0.0034 | 65.15  | 567,046 |
| BK1653 | Eskimo_Sireniki | Mbuti | 0.2227 | 0.0035 | 64.24  | 559,266 |
| BK1653 | Yadava          | Mbuti | 0.2225 | 0.0034 | 65.31  | 565,596 |

| A      | B             | C     | $f_3$  | stderr | Zscore | nsnps   |
|--------|---------------|-------|--------|--------|--------|---------|
| BK1653 | Yemenite_Jew  | Mbuti | 0.2222 | 0.0035 | 63.75  | 566,408 |
| BK1653 | Kapu          | Mbuti | 0.2218 | 0.0034 | 65.09  | 567,249 |
| BK1653 | BedouinB      | Mbuti | 0.2216 | 0.0034 | 65.25  | 563,344 |
| BK1653 | Madiga        | Mbuti | 0.2214 | 0.0034 | 64.24  | 566,852 |
| BK1653 | Bengali       | Mbuti | 0.2212 | 0.0034 | 64.26  | 567,824 |
| BK1653 | Mala          | Mbuti | 0.2212 | 0.0033 | 66.52  | 583,946 |
| BK1653 | Makrani       | Mbuti | 0.2210 | 0.0035 | 63.56  | 566,729 |
| BK1653 | Yakut         | Mbuti | 0.2205 | 0.0035 | 62.91  | 562,835 |
| BK1653 | Even          | Mbuti | 0.2204 | 0.0035 | 63.00  | 577,274 |
| BK1653 | Relli         | Mbuti | 0.2203 | 0.0034 | 65.03  | 567,044 |
| BK1653 | Kurumba       | Mbuti | 0.2203 | 0.0036 | 61.59  | 537,067 |
| BK1653 | Palestinian   | Mbuti | 0.2201 | 0.0034 | 64.00  | 586,450 |
| BK1653 | Khonda_Dora   | Mbuti | 0.2193 | 0.0036 | 61.75  | 537,853 |
| BK1653 | She           | Mbuti | 0.2191 | 0.0035 | 62.32  | 561,439 |
| BK1653 | Irula         | Mbuti | 0.2191 | 0.0034 | 64.95  | 565,501 |
| BK1653 | Jordanian     | Mbuti | 0.2190 | 0.0034 | 64.63  | 585,458 |
| BK1653 | Oroqen        | Mbuti | 0.2190 | 0.0034 | 63.81  | 561,439 |
| BK1653 | Ulchi         | Mbuti | 0.2187 | 0.0035 | 62.86  | 560,932 |
| BK1653 | Miao          | Mbuti | 0.2186 | 0.0035 | 62.98  | 561,446 |
| BK1653 | Kinh          | Mbuti | 0.2182 | 0.0036 | 61.20  | 562,644 |
| BK1653 | Kharia        | Mbuti | 0.2180 | 0.0035 | 61.74  | 538,015 |
| BK1653 | Han           | Mbuti | 0.2180 | 0.0035 | 63.00  | 562,450 |
| BK1653 | Tibetan       | Mbuti | 0.2177 | 0.0035 | 62.20  | 563,061 |
| BK1653 | Dai           | Mbuti | 0.2176 | 0.0035 | 62.46  | 575,587 |
| BK1653 | Burmese       | Mbuti | 0.2175 | 0.0034 | 63.71  | 565,166 |
| BK1653 | Thai          | Mbuti | 0.2175 | 0.0035 | 62.45  | 563,920 |
| BK1653 | Naxi          | Mbuti | 0.2173 | 0.0035 | 62.25  | 577,546 |
| BK1653 | Ami           | Mbuti | 0.2173 | 0.0036 | 60.05  | 559,436 |
| BK1653 | Korean        | Mbuti | 0.2171 | 0.0035 | 62.51  | 562,443 |
| BK1653 | Onge          | Mbuti | 0.2171 | 0.0036 | 61.10  | 553,779 |
| BK1653 | Hezhen        | Mbuti | 0.2169 | 0.0034 | 63.15  | 561,938 |
| BK1653 | Daur          | Mbuti | 0.2169 | 0.0036 | 59.64  | 538,188 |
| BK1653 | Tujia         | Mbuti | 0.2168 | 0.0035 | 61.37  | 561,915 |
| BK1653 | Kusunda       | Mbuti | 0.2167 | 0.0035 | 62.73  | 559,039 |
| BK1653 | Xibo          | Mbuti | 0.2167 | 0.0035 | 61.54  | 563,581 |
| BK1653 | Yi            | Mbuti | 0.2164 | 0.0035 | 62.54  | 563,195 |
| BK1653 | Lahu          | Mbuti | 0.2164 | 0.0035 | 61.94  | 560,869 |
| BK1653 | Tu            | Mbuti | 0.2162 | 0.0034 | 62.75  | 564,421 |
| BK1653 | Botocudo      | Mbuti | 0.2162 | 0.0036 | 59.51  | 507,705 |
| BK1653 | Sherpa        | Mbuti | 0.2159 | 0.0035 | 62.54  | 560,765 |
| BK1653 | Atayal        | Mbuti | 0.2158 | 0.0037 | 58.47  | 535,879 |
| BK1653 | Australian    | Mbuti | 0.2157 | 0.0036 | 59.81  | 563,162 |
| BK1653 | Igorot        | Mbuti | 0.2156 | 0.0036 | 60.07  | 557,799 |
| BK1653 | Japanese      | Mbuti | 0.2156 | 0.0034 | 62.73  | 576,154 |
| BK1653 | Cambodian     | Mbuti | 0.2156 | 0.0035 | 61.50  | 564,057 |
| BK1653 | Dusun         | Mbuti | 0.2155 | 0.0035 | 60.82  | 559,626 |
| BK1653 | Hawaiian      | Mbuti | 0.2145 | 0.0037 | 58.54  | 537,517 |
| BK1653 | Bougainville  | Mbuti | 0.2137 | 0.0035 | 60.42  | 555,929 |
| BK1653 | Papuan        | Mbuti | 0.2129 | 0.0035 | 60.26  | 592,384 |
| BK1653 | Saharawi      | Mbuti | 0.1985 | 0.0034 | 59.19  | 570,351 |
| BK1653 | Mozabite      | Mbuti | 0.1963 | 0.0034 | 58.02  | 570,096 |
| BK1653 | Somali        | Mbuti | 0.1474 | 0.0033 | 45.19  | 535,618 |
| BK1653 | Masai         | Mbuti | 0.1192 | 0.0028 | 42.61  | 569,367 |
| BK1653 | Dinka         | Mbuti | 0.0924 | 0.0026 | 35.02  | 566,732 |
| BK1653 | Mandenka      | Mbuti | 0.0894 | 0.0026 | 34.93  | 574,270 |
| BK1653 | Gambian       | Mbuti | 0.0879 | 0.0024 | 36.30  | 573,546 |
| BK1653 | Luo           | Mbuti | 0.0864 | 0.0026 | 33.67  | 571,520 |
| BK1653 | Luhya         | Mbuti | 0.0853 | 0.0024 | 34.86  | 571,591 |
| BK1653 | BantuKenya    | Mbuti | 0.0852 | 0.0025 | 34.73  | 571,422 |
| BK1653 | Esan          | Mbuti | 0.0831 | 0.0025 | 33.28  | 574,167 |
| BK1653 | Yoruba        | Mbuti | 0.0830 | 0.0024 | 34.06  | 574,776 |
| BK1653 | Mende         | Mbuti | 0.0827 | 0.0025 | 33.54  | 573,964 |
| BK1653 | Igbo          | Mbuti | 0.0824 | 0.0024 | 33.88  | 574,063 |
| BK1653 | Lemande       | Mbuti | 0.0815 | 0.0025 | 32.49  | 572,791 |
| BK1653 | Kongo         | Mbuti | 0.0812 | 0.0026 | 31.51  | 537,560 |
| BK1653 | BantuHerero   | Mbuti | 0.0794 | 0.0024 | 33.15  | 571,057 |
| BK1653 | BantuTswana   | Mbuti | 0.0723 | 0.0023 | 31.26  | 571,965 |
| BK1653 | Biaka         | Mbuti | 0.0520 | 0.0019 | 26.74  | 561,347 |
| BK1653 | Ju_hoan_North | Mbuti | 0.0465 | 0.0020 | 23.53  | 576,762 |
| BK1653 | Khomani_San   | Mbuti | 0.0462 | 0.0021 | 22.27  | 554,629 |

1033

1034 **Table S5.6 D(IUP Bacho Kiro1, IUP Bacho Kiro2; IUP Bacho Kiro3, Mbuti).** Derived allele  
 1035 sharing among IUP Bacho Kiro Cave specimens. These statistics were calculated using  
 1036 ADMIXTOOLS<sup>3</sup> as implemented in *admixr*<sup>9</sup>. Standard errors (SE) were computed using a  
 1037 Weighted Block Jackknife<sup>3,12</sup> across all autosomes of the “2200k” Panel and using a block size  
 1038 of 5Mb. Three Mbuti individuals from SGDP<sup>10</sup> were used as outgroup. Number of SNPs  
 1039 overlapping among individuals reported in the column “#SNPs”.

| WW                 | X                  | Y                 | Z     | D       | SE     | Z-score | ABBA   | BABA   | #SNPs   |
|--------------------|--------------------|-------------------|-------|---------|--------|---------|--------|--------|---------|
| BachoKiro_F6_620   | BachoKiro_CC7_2289 | BachoKiro_BB7_240 | Mbuti | -0.0844 | 0.0429 | -1.966  | 196    | 232    | 4,280   |
| BachoKiro_F6_620   | BachoKiro_CC7_335  | BachoKiro_BB7_240 | Mbuti | -0.026  | 0.0103 | -2.523  | 17,437 | 18,370 | 383,549 |
| BachoKiro_CC7_2289 | BachoKiro_CC7_335  | BachoKiro_BB7_240 | Mbuti | 0.0949  | 0.0564 | 1.681   | 139    | 115    | 2,592   |
| BachoKiro_F6_620   | BachoKiro_BB7_240  | BachoKiro_CC7_335 | Mbuti | -0.0062 | 0.0107 | -0.578  | 18,144 | 18,370 | 383,549 |
| BachoKiro_F6_620   | BachoKiro_CC7_2289 | BachoKiro_CC7_335 | Mbuti | -0.0511 | 0.0454 | -1.126  | 173    | 191    | 3,824   |
| BachoKiro_BB7_240  | BachoKiro_CC7_2289 | BachoKiro_CC7_335 | Mbuti | -0.0278 | 0.0597 | -0.466  | 115    | 122    | 2,592   |
| BachoKiro_BB7_240  | BachoKiro_CC7_2289 | BachoKiro_F6_620  | Mbuti | -0.0227 | 0.0426 | -0.534  | 196    | 205    | 4,280   |
| BachoKiro_BB7_240  | BachoKiro_CC7_335  | BachoKiro_F6_620  | Mbuti | -0.0199 | 0.0102 | -1.953  | 17,437 | 18,144 | 383,549 |
| BachoKiro_CC7_2289 | BachoKiro_CC7_335  | BachoKiro_F6_620  | Mbuti | -0.0067 | 0.0480 | -0.139  | 170    | 173    | 3,824   |

1040

1041 **Table S5.7 D(IUP Bacho Kiro<sub>1</sub>, X; IUP Bacho Kiro CC7-2289, Mbuti).** Derived allele sharing  
 1042 between Bacho Kiro CC7-2289 and the remaining three IUP Bacho Kiro Cave individuals.  
 1043 These statistics were calculated using ADMIXTOOLS<sup>3</sup> as implemented in *admixr*<sup>9</sup>. Standard  
 1044 errors (SE) were computed using a Weighted Block Jackknife<sup>3,12</sup> across all autosomes of the  
 1045 “2200k” Panel and using a block size of 5Mb. Number of SNPs overlapping among individuals  
 1046 reported in the column “#SNPs”. Significant statistics (*Z-score*) or  $Z \geq 3$  highlighted in yellow.

| W                 | X           | Y                  | Z     | D      | SE       | Z-score | ABBA | BABA | #SNPs |
|-------------------|-------------|--------------------|-------|--------|----------|---------|------|------|-------|
| BachoKiro_F6_620  | UstIshim    | BachoKiro_CC7_2289 | Mbuti | 0.1209 | 0.030523 | 3.96    | 380  | 298  | 6,630 |
| BachoKiro_F6_620  | Tianyuan    | BachoKiro_CC7_2289 | Mbuti | 0.1367 | 0.034261 | 3.99    | 366  | 278  | 6,440 |
| BachoKiro_F6_620  | Kostenki14  | BachoKiro_CC7_2289 | Mbuti | 0.156  | 0.035395 | 4.41    | 383  | 280  | 6,495 |
| BachoKiro_F6_620  | SunghirIII  | BachoKiro_CC7_2289 | Mbuti | 0.1535 | 0.030878 | 4.97    | 396  | 291  | 6,629 |
| BachoKiro_F6_620  | GoyetQ116-1 | BachoKiro_CC7_2289 | Mbuti | 0.0711 | 0.039682 | 1.79    | 270  | 234  | 4,733 |
| BachoKiro_F6_620  | Vestonice16 | BachoKiro_CC7_2289 | Mbuti | 0.0747 | 0.038493 | 1.94    | 291  | 251  | 5,210 |
| BachoKiro_F6_620  | Yana_old    | BachoKiro_CC7_2289 | Mbuti | 0.1185 | 0.030971 | 3.83    | 412  | 325  | 6,898 |
| BachoKiro_F6_620  | Malta1      | BachoKiro_CC7_2289 | Mbuti | 0.117  | 0.036479 | 3.21    | 292  | 231  | 4,993 |
| BachoKiro_F6_620  | ElMiron     | BachoKiro_CC7_2289 | Mbuti | 0.0878 | 0.041912 | 2.10    | 259  | 217  | 4,723 |
| BachoKiro_F6_620  | Villabruna  | BachoKiro_CC7_2289 | Mbuti | 0.1224 | 0.035597 | 3.44    | 357  | 279  | 6,015 |
| BachoKiro_F6_620  | Bichon      | BachoKiro_CC7_2289 | Mbuti | 0.1322 | 0.031973 | 4.13    | 411  | 315  | 6,887 |
| BachoKiro_F6_620  | Satsurlbia  | BachoKiro_CC7_2289 | Mbuti | 0.1156 | 0.038892 | 2.97    | 279  | 221  | 4,643 |
| BachoKiro_F6_620  | Kotias      | BachoKiro_CC7_2289 | Mbuti | 0.1575 | 0.031806 | 4.95    | 410  | 299  | 6,895 |
| BachoKiro_F6_620  | Karelia     | BachoKiro_CC7_2289 | Mbuti | 0.128  | 0.033567 | 3.81    | 340  | 263  | 6,030 |
| BachoKiro_F6_620  | Loschbour   | BachoKiro_CC7_2289 | Mbuti | 0.1465 | 0.029846 | 4.91    | 388  | 289  | 6,630 |
| BachoKiro_F6_620  | LaBranal    | BachoKiro_CC7_2289 | Mbuti | 0.1142 | 0.033225 | 3.44    | 391  | 311  | 6,678 |
| BachoKiro_F6_620  | LBK         | BachoKiro_CC7_2289 | Mbuti | 0.1174 | 0.030731 | 3.82    | 388  | 307  | 6,630 |
| BachoKiro_F6_620  | Saqqaq      | BachoKiro_CC7_2289 | Mbuti | 0.136  | 0.033334 | 4.08    | 390  | 297  | 6,747 |
| BachoKiro_BB7_240 | UstIshim    | BachoKiro_CC7_2289 | Mbuti | 0.1417 | 0.036482 | 3.88    | 247  | 186  | 4,150 |
| BachoKiro_BB7_240 | Tianyuan    | BachoKiro_CC7_2289 | Mbuti | 0.1415 | 0.042673 | 3.32    | 239  | 180  | 4,150 |
| BachoKiro_BB7_240 | Kostenki14  | BachoKiro_CC7_2289 | Mbuti | 0.1882 | 0.040817 | 4.61    | 259  | 177  | 4,030 |
| BachoKiro_BB7_240 | SunghirIII  | BachoKiro_CC7_2289 | Mbuti | 0.1947 | 0.037684 | 5.17    | 248  | 167  | 4,149 |
| BachoKiro_BB7_240 | GoyetQ116-1 | BachoKiro_CC7_2289 | Mbuti | 0.1395 | 0.045057 | 3.10    | 204  | 154  | 3,216 |
| BachoKiro_BB7_240 | Vestonice16 | BachoKiro_CC7_2289 | Mbuti | 0.1246 | 0.04492  | 2.77    | 202  | 158  | 3,525 |
| BachoKiro_BB7_240 | Yana_old    | BachoKiro_CC7_2289 | Mbuti | 0.1551 | 0.040902 | 3.79    | 259  | 189  | 4,307 |
| BachoKiro_BB7_240 | Malta1      | BachoKiro_CC7_2289 | Mbuti | 0.1421 | 0.044923 | 3.16    | 185  | 139  | 3,131 |
| BachoKiro_BB7_240 | ElMiron     | BachoKiro_CC7_2289 | Mbuti | 0.1232 | 0.046449 | 2.65    | 187  | 146  | 3,263 |
| BachoKiro_BB7_240 | Villabruna  | BachoKiro_CC7_2289 | Mbuti | 0.1503 | 0.041844 | 3.59    | 246  | 182  | 3,986 |
| BachoKiro_BB7_240 | Bichon      | BachoKiro_CC7_2289 | Mbuti | 0.1454 | 0.041171 | 3.53    | 255  | 190  | 4,301 |
| BachoKiro_BB7_240 | Satsurlbia  | BachoKiro_CC7_2289 | Mbuti | 0.1731 | 0.045897 | 3.77    | 185  | 130  | 2,919 |
| BachoKiro_BB7_240 | Kotias      | BachoKiro_CC7_2289 | Mbuti | 0.1605 | 0.040556 | 3.96    | 266  | 192  | 4,306 |
| BachoKiro_BB7_240 | Karelia     | BachoKiro_CC7_2289 | Mbuti | 0.1283 | 0.042825 | 3.00    | 236  | 182  | 3,808 |
| BachoKiro_BB7_240 | Loschbour   | BachoKiro_CC7_2289 | Mbuti | 0.1829 | 0.037259 | 4.91    | 257  | 178  | 4,151 |
| BachoKiro_BB7_240 | LaBranal    | BachoKiro_CC7_2289 | Mbuti | 0.1511 | 0.040459 | 3.74    | 257  | 190  | 4,194 |
| BachoKiro_BB7_240 | LBK         | BachoKiro_CC7_2289 | Mbuti | 0.1455 | 0.036741 | 3.96    | 259  | 193  | 4,150 |
| BachoKiro_BB7_240 | Saqqaq      | BachoKiro_CC7_2289 | Mbuti | 0.167  | 0.040003 | 4.17    | 252  | 180  | 4,246 |
| BachoKiro_CC7_335 | UstIshim    | BachoKiro_CC7_2289 | Mbuti | 0.1158 | 0.040286 | 2.87    | 200  | 158  | 3,711 |
| BachoKiro_CC7_335 | Tianyuan    | BachoKiro_CC7_2289 | Mbuti | 0.1594 | 0.044517 | 3.58    | 209  | 151  | 3,719 |
| BachoKiro_CC7_335 | Kostenki14  | BachoKiro_CC7_2289 | Mbuti | 0.1778 | 0.048147 | 3.69    | 207  | 145  | 3,616 |
| BachoKiro_CC7_335 | SunghirIII  | BachoKiro_CC7_2289 | Mbuti | 0.1618 | 0.039198 | 4.13    | 215  | 155  | 3,710 |
| BachoKiro_CC7_335 | GoyetQ116-1 | BachoKiro_CC7_2289 | Mbuti | 0.108  | 0.048589 | 2.22    | 172  | 138  | 2,832 |
| BachoKiro_CC7_335 | Vestonice16 | BachoKiro_CC7_2289 | Mbuti | 0.0802 | 0.045406 | 1.77    | 186  | 158  | 3,135 |
| BachoKiro_CC7_335 | Yana_old    | BachoKiro_CC7_2289 | Mbuti | 0.1377 | 0.042943 | 3.21    | 215  | 163  | 3,855 |
| BachoKiro_CC7_335 | Malta1      | BachoKiro_CC7_2289 | Mbuti | 0.1068 | 0.051949 | 2.06    | 145  | 117  | 2,805 |
| BachoKiro_CC7_335 | ElMiron     | BachoKiro_CC7_2289 | Mbuti | 0.137  | 0.050974 | 2.69    | 178  | 135  | 2,902 |
| BachoKiro_CC7_335 | Villabruna  | BachoKiro_CC7_2289 | Mbuti | 0.155  | 0.045352 | 3.42    | 211  | 154  | 3,527 |
| BachoKiro_CC7_335 | Bichon      | BachoKiro_CC7_2289 | Mbuti | 0.1405 | 0.040644 | 3.46    | 220  | 166  | 3,852 |
| BachoKiro_CC7_335 | Kotias      | BachoKiro_CC7_2289 | Mbuti | 0.1738 | 0.040859 | 4.25    | 223  | 157  | 3,851 |
| BachoKiro_CC7_335 | Karelia     | BachoKiro_CC7_2289 | Mbuti | 0.1354 | 0.043918 | 3.08    | 186  | 142  | 3,372 |
| BachoKiro_CC7_335 | Loschbour   | BachoKiro_CC7_2289 | Mbuti | 0.1399 | 0.040158 | 3.48    | 203  | 153  | 3,710 |
| BachoKiro_CC7_335 | LaBranal    | BachoKiro_CC7_2289 | Mbuti | 0.1099 | 0.043837 | 2.51    | 206  | 165  | 3,760 |
| BachoKiro_CC7_335 | LBK         | BachoKiro_CC7_2289 | Mbuti | 0.1086 | 0.04105  | 2.65    | 210  | 169  | 3,711 |
| BachoKiro_CC7_335 | Saqqaq      | BachoKiro_CC7_2289 | Mbuti | 0.1384 | 0.041355 | 3.35    | 208  | 158  | 3,805 |

1047

1048 **Table S5.8 Z-scores of the statistics  $D(\text{Bacho Kiro F6-620}, X; Y \text{ Mbuti})$ .** Standard errors (SE) were computed using a Weighted Block Jackknife<sup>3,12</sup>  
 1049 across all autosomes of the “2200k” Panel and using a block size of 5Mb. Blue: Z-score  $\leq -3$ ; Yellow: Z-score  $\geq 3$ .

| X/Y               | Bachokiro_BB7_240 | Bachokiro_CC7_335 | UstIshim | Oase1 | Tianyuan | Kostenki14 | GoyeQ116-1 | Bachokiro_BK_1653 | SungshirIII | Yana_old | Vestonice16 | Malta1 | ElMiron | Villabruna | Bichon | Clovis | Satsurblia | Kolyma_River | Kotias | Karelia | Loschbour | LaBranal | Hungarian.KO1 | Motala12 | LBK   | Saqqaq |
|-------------------|-------------------|-------------------|----------|-------|----------|------------|------------|-------------------|-------------|----------|-------------|--------|---------|------------|--------|--------|------------|--------------|--------|---------|-----------|----------|---------------|----------|-------|--------|
| Bachokiro_BB7_240 | NA                | -0.58             | 0.73     | 0.84  | 1.66     | -1.99      | -2.67      | -1.85             | -2.04       | -0.21    | -2.11       | -0.40  | -2.16   | -2.57      | -2.89  | -1.25  | -1.53      | -0.46        | -1.69  | -0.72   | -2.17     | -1.91    | -1.79         | -2.14    | -0.76 | -0.41  |
| Bachokiro_CC7_335 | -2.52             | NA                | 1.01     | 0.28  | 0.93     | -2.30      | -2.36      | 0.15              | -1.34       | -0.06    | -2.52       | -0.74  | -0.84   | -2.87      | -2.36  | -0.79  | -1.79      | -1.52        | -1.11  | -0.71   | -2.41     | -2.10    | -1.48         | -2.01    | -1.82 | -0.26  |
| UstIshim          | 8.67              | 9.63              | NA       | 5.94  | 0.63     | -4.02      | -3.14      | -1.23             | -3.10       | -1.10    | -3.74       | -2.36  | -2.41   | -3.21      | -3.91  | -0.95  | -3.37      | -1.72        | -2.00  | -0.80   | -3.84     | -3.34    | -1.48         | -3.61    | -2.17 | 0.20   |
| Oase1             | 4.64              | 6.66              | 2.73     | NA    | 2.50     | 0.94       | 1.09       | 2.00              | 1.55        | 2.71     | 1.20        | 2.23   | 0.55    | 0.15       | 0.54   | 2.92   | 0.14       | 1.38         | 2.06   | 1.67    | 0.85      | 0.69     | 0.89          | 1.24     | 1.19  | 2.27   |
| Tianyuan          | 6.79              | 8.30              | 1.59     | 3.47  | NA       | -3.27      | -4.20      | -1.68             | -3.53       | -5.69    | -3.05       | -3.56  | -2.78   | -3.81      | -4.47  | -8.05  | -2.62      | -8.74        | -2.95  | -4.19   | -4.48     | -4.21    | -3.41         | -4.01    | -1.54 | -8.87  |
| Kostenki14        | 8.98              | 11.46             | 1.84     | 5.58  | 1.01     | NA         | 11.57      | 12.26             | 17.98       | 10.17    | 15.93       | -9.26  | 12.87   | 14.31      | 14.56  | -2.94  | -9.35      | -2.52        | -9.13  | 10.37   | 15.42     | 14.95    | 12.56         | 13.88    | 10.10 | -0.83  |
| GoyeQ116-1_old    | 5.77              | 7.66              | 3.04     | 3.33  | 2.20     | 14.94      | NA         | 15.82             | 13.80       | 10.15    | 15.46       | 10.66  | 22.26   | 15.01      | 16.22  | -4.26  | -8.41      | -4.66        | -9.17  | 11.33   | 18.84     | 20.03    | 14.21         | 15.43    | 12.57 | -2.89  |
| Bachokiro_BK_1653 | 8.50              | 11.46             | 0.18     | 5.52  | 0.98     | 13.16      | 13.34      | NA                | 12.38       | -7.61    | 17.39       | -7.00  | 14.48   | 15.82      | 15.72  | -1.84  | -7.28      | -2.06        | -7.82  | 10.02   | 15.60     | 16.72    | 13.01         | 13.83    | 12.34 | -0.55  |
| SungshirIII       | 9.14              | 11.47             | 1.80     | 5.71  | 0.29     | 19.14      | 11.76      | 12.37             | NA          | -7.59    | 21.64       | -9.47  | 13.79   | 15.43      | 16.54  | -2.59  | -9.05      | -2.72        | -9.74  | 11.55   | 16.70     | 16.67    | 14.72         | 14.17    | 11.44 | -1.60  |
| Yana_old          | 9.48              | 11.55             | 1.49     | 5.66  | 3.74     | 12.54      | -9.67      | -9.21             | -9.22       | NA       | 11.94       | 11.18  | -9.53   | 10.52      | 12.06  | -7.10  | -7.86      | -6.04        | -8.24  | 11.14   | 12.16     | 11.87    | 11.06         | 10.41    | -9.18 | -5.66  |
| Vestonice16       | 7.73              | 9.56              | 2.08     | 4.64  | 0.33     | 17.21      | 12.22      | 17.39             | 21.84       | 10.69    | NA          | 11.04  | 16.90   | 19.03      | 18.32  | -3.94  | -9.09      | -3.21        | -9.08  | 12.44   | 20.30     | 18.25    | 18.60         | 16.40    | 12.94 | -1.78  |
| Malta1            | 9.25              | 10.19             | 1.91     | 4.77  | 1.51     | 11.61      | -9.59      | -8.32             | 10.18       | 10.34    | 11.68       | NA     | -9.98   | 12.10      | 14.21  | 13.35  | 11.45      | 11.56        | 11.26  | 21.53   | 14.56     | 13.11    | 13.88         | 19.81    | -9.84 | -8.75  |
| ElMiron           | 7.80              | 9.32              | 1.64     | 3.51  | 0.07     | 15.49      | 19.76      | 14.87             | 13.87       | -8.63    | 17.41       | -9.16  | NA      | 26.67      | 28.54  | -5.34  | -8.98      | -3.94        | 11.08  | 14.38   | 30.94     | 34.40    | 23.10         | 22.09    | 14.99 | -2.40  |
| Villabruna        | 8.39              | 10.27             | 1.48     | 4.15  | 0.12     | 14.52      | 12.24      | 15.03             | 14.62       | -8.34    | 18.22       | 10.37  | 24.63   | NA         | 41.40  | -4.54  | 12.63      | -4.39        | 14.00  | 19.97   | 44.93     | 37.85    | 38.04         | 32.43    | 19.41 | -2.73  |
| Bichon            | 8.66              | 11.09             | 1.66     | 5.85  | 0.05     | 14.56      | 12.80      | 13.67             | 14.83       | -8.72    | 16.98       | 12.02  | 26.40   | 39.83      | NA     | -4.79  | 13.44      | -5.29        | 13.51  | 20.57   | 45.57     | 38.74    | 36.29         | 32.40    | 18.59 | -4.06  |
| Clovis            | 8.41              | 10.38             | 1.83     | 5.17  | 6.15     | -6.03      | -4.20      | -3.68             | -4.80       | -7.42    | -5.82       | 13.73  | -6.77   | -7.01      | -8.41  | NA     | -8.67      | 22.65        | -7.58  | 15.26   | 10.01     | -9.52    | -8.89         | 12.10    | -6.57 | 21.38  |
| Satsurblia        | 12.59             | 12.99             | 1.51     | 7.82  | 4.27     | -5.96      | -2.54      | -3.16             | -4.96       | -1.98    | -4.75       | -6.91  | -4.90   | -9.01      | 11.55  | -2.20  | NA         | -2.12        | 27.74  | 10.59   | 11.13     | -9.08    | 10.59         | 11.71    | 15.05 | -0.09  |
| Kolyma_River      | 8.91              | 9.96              | 2.61     | 4.19  | 7.13     | -5.46      | -4.96      | -3.99             | -5.00       | -6.84    | -5.23       | 12.44  | -5.48   | -7.35      | -9.04  | 23.97  | -8.23      | NA           | -7.67  | 14.57   | -8.52     | -7.96    | -8.82         | 11.27    | -6.45 | 25.92  |
| Kotias            | 11.61             | 14.34             | 1.59     | 8.24  | 3.25     | -7.06      | -3.93      | -4.66             | -6.41       | -3.38    | -6.00       | -7.20  | -7.19   | 10.66      | 12.07  | -2.38  | 28.28      | -2.57        | NA     | 11.96   | 12.56     | 11.23    | 11.48         | 13.63    | 15.85 | -2.05  |
| Karelia           | 9.56              | 11.64             | 0.06     | 5.67  | 0.96     | 12.29      | -9.50      | 10.18             | 11.74       | -9.43    | 12.72       | 20.23  | 14.47   | 21.12      | 23.90  | 13.93  | 15.77      | 13.04        | 15.25  | NA      | 24.22     | 22.41    | 25.03         | 29.50    | 16.22 | -9.70  |
| Loschbour         | 9.40              | 11.06             | 1.50     | 6.23  | 0.06     | 14.38      | 14.74      | 14.08             | 14.81       | -8.91    | 17.50       | 11.81  | 27.59   | 41.83      | 44.77  | -6.03  | 13.24      | -4.81        | 13.72  | 21.12   | NA        | 39.30    | 37.19         | 33.99    | 19.70 | -3.90  |
| LaBranal          | 9.65              | 11.46             | 1.17     | 5.92  | 0.22     | 13.79      | 16.06      | 14.75             | 14.65       | -8.77    | 15.92       | 10.76  | 30.41   | 35.90      | 39.47  | -5.90  | 11.58      | -4.60        | 13.38  | 19.28   | 41.59     | NA       | 32.81         | 29.36    | 17.90 | -4.19  |
| Hungarian.KO1     | 9.54              | 11.18             | 0.01     | 5.02  | 0.88     | 13.19      | 11.35      | 12.29             | 13.81       | -8.62    | 16.21       | 12.37  | 20.83   | 37.69      | 38.10  | -6.02  | 13.88      | -5.83        | 14.46  | 22.87   | 39.56     | 36.23    | NA            | 32.48    | 21.44 | -4.69  |
| Motala12          | 10.64             | 12.21             | 1.10     | 6.01  | 0.54     | 12.52      | 11.80      | 12.05             | 11.88       | -7.30    | 14.55       | 16.84  | 19.15   | 31.00      | 32.02  | -8.54  | 14.52      | -7.32        | 16.18  | 27.37   | 34.22     | 29.47    | 30.83         | NA       | 19.78 | -5.13  |
| LBK               | 12.58             | 13.58             | 1.32     | 8.16  | 4.40     | -8.05      | -6.49      | -8.89             | -8.34       | -3.97    | -9.42       | -5.88  | 10.58   | 15.81      | 16.79  | -1.23  | 15.68      | -1.14        | 16.46  | 12.06   | 17.91     | 15.58    | 17.59         | 17.53    | NA    | -1.04  |
| Saqqaq            | 8.26              | 10.27             | 1.55     | 4.56  | 7.68     | -4.62      | -3.84      | -3.37             | -4.52       | -7.08    | -4.49       | 10.84  | -4.67   | -6.16      | -8.18  | 23.90  | -7.22      | 27.06        | -8.12  | 12.61   | -8.44     | -8.50    | -8.51         | -9.44    | -7.28 | NA     |

1050 **Table S5.9 Z-scores of the statistics  $D(\text{Bacho Kiro BB7-240}, X; Y \text{ Mbuti})$ .** Standard errors (SE) were computed using a Weighted Block Jackknife<sup>3,12</sup>  
 1051 across all autosomes of the “2200k” Panel and using a block size of 5Mb. Blue: Z-score  $\leq -3$ ; Yellow: Z-score  $\geq 3$ .

| X/Y               | BachoKiro_F6_620 | BachoKiro_CC7_335 | UstIshim | Oase1 | Tianyuan | Kostenki14 | GoyetQ116-I | BachoKiro_BK1653 | SunghirII | Yana_old | Vestonice16 | Malta1 | ElMiron | Villabruna | Bichon | Clovis | Satsurblia | Kolyma_River | Kotias | Karelia | Loschbour | LaBranal | Hungarian.KO1 | Motala12 | LBK   | Saqqaq |
|-------------------|------------------|-------------------|----------|-------|----------|------------|-------------|------------------|-----------|----------|-------------|--------|---------|------------|--------|--------|------------|--------------|--------|---------|-----------|----------|---------------|----------|-------|--------|
| BachoKiro_F6_620  | NA               | 0.58              | 0.73     | 0.84  | 1.66     | 1.99       | 2.67        | 1.85             | 2.04      | 0.21     | 2.11        | 0.40   | 2.16    | 2.57       | 2.89   | 1.25   | 1.53       | 0.46         | 1.69   | 0.72    | 2.17      | 1.91     | 1.79          | 2.14     | 0.76  | 0.41   |
| BachoKiro_CC7_335 | -1.95            | NA                | 0.09     | 0.97  | 0.73     | -0.01      | 0.94        | 2.01             | 0.91      | 0.53     | 0.09        | -0.15  | 0.07    | -0.53      | 0.45   | 0.49   | -0.24      | -0.40        | 0.72   | 0.59    | 0.68      | -0.26    | 0.52          | 0.40     | -0.33 | 0.94   |
| UstIshim          | 9.42             | 10.87             | NA       | 6.62  | 1.23     | -1.86      | 0.22        | 0.72             | -1.41     | -1.07    | -1.57       | -1.59  | -0.42   | -0.66      | -1.07  | -0.33  | -2.00      | -1.87        | -0.55  | -0.11   | -1.82     | -1.47    | -0.20         | -1.66    | -1.82 | 0.06   |
| Oase1             | 5.28             | 6.62              | 2.70     | NA    | 2.53     | 1.86       | 3.25        | 1.86             | 2.23      | 2.95     | 3.36        | 2.12   | 2.63    | 1.34       | 2.41   | 2.77   | 1.87       | 1.13         | 2.38   | 1.16    | 2.90      | 2.31     | 1.64          | 1.50     | 1.57  | 2.20   |
| Tianyuan          | 8.56             | 9.95              | 1.23     | 3.88  | NA       | -1.04      | -0.50       | 0.97             | -1.43     | -4.86    | -0.08       | -2.88  | -0.59   | -1.02      | -1.26  | -6.10  | -0.55      | -7.98        | -0.84  | -2.89   | -2.11     | -1.39    | -1.39         | -1.60    | -0.86 | -7.70  |
| Kostenki14        | 11.45            | 11.97             | 1.29     | 6.15  | 2.28     | NA         | -8.32       | -9.78            | 15.47     | -9.24    | 12.17       | -8.36  | -9.82   | 10.67      | 11.03  | -2.12  | -6.93      | -2.74        | -7.83  | -9.79   | 12.45     | 11.55    | 11.25         | 10.75    | -9.49 | -0.67  |
| GoyetQ116-I_old   | 9.13             | 9.00              | 2.66     | 4.07  | -        | 12.41      | NA          | 13.19            | 11.68     | -9.02    | 11.08       | -9.15  | 19.80   | 11.83      | 13.01  | -2.88  | -6.06      | -3.90        | -7.04  | -9.72   | 16.28     | 16.39    | 11.60         | 12.65    | 10.94 | -2.46  |
| BachoKiro_BK1653  | 10.69            | 12.45             | 0.60     | 6.31  | 3.07     | 11.26      | -9.89       | NA               | 11.36     | -7.10    | 13.61       | -6.45  | 11.93   | 12.41      | 11.58  | -0.61  | -5.04      | -1.09        | -6.56  | -9.19   | 13.26     | 12.79    | 10.12         | 10.88    | 10.93 | 0.34   |
| SunghirII         | 11.59            | 13.38             | 1.44     | 6.22  | 1.26     | 16.11      | -8.15       | 10.04            | NA        | -7.76    | 17.90       | -8.63  | 11.85   | 12.15      | 13.94  | -2.07  | -7.68      | -3.17        | -9.19  | -       | 15.05     | 13.99    | 13.34         | 13.02    | 11.91 | -1.47  |
| Yana_old          | 10.23            | 12.44             | 0.73     | 6.91  | 2.12     | -9.54      | -5.96       | -6.63            | -7.42     | NA       | -8.27       | 10.75  | -6.69   | -7.00      | -8.11  | -5.45  | -5.92      | -5.98        | -6.78  | -9.87   | 10.00     | -9.56    | -9.15         | -8.56    | -8.64 | -5.05  |
| Vestonice16       | 10.79            | 10.70             | 2.08     | 6.16  | 1.64     | 13.75      | -9.04       | 14.52            | 18.20     | -9.81    | NA          | -8.99  | 14.51   | 15.38      | 14.99  | -2.42  | -7.16      | -2.99        | -7.72  | 12.17   | 17.54     | 14.67    | 15.03         | 14.16    | 11.72 | -1.56  |
| Malta1            | 10.01            | 10.92             | 1.65     | 5.35  | 0.71     | -9.29      | -6.37       | -6.40            | -8.72     | 10.46    | -8.59       | NA     | -7.44   | -9.19      | 11.20  | 11.87  | 10.17      | 10.33        | 10.35  | 20.15   | 12.46     | 11.52    | 12.16         | 16.55    | -9.80 | -8.71  |
| ElMiron           | 10.16            | 10.28             | 1.30     | 4.91  | 1.00     | 11.75      | 16.22       | 12.32            | 12.59     | -8.26    | 13.39       | -7.51  | NA      | 22.51      | 24.94  | -4.00  | -6.59      | -3.40        | -8.69  | 12.95   | 29.63     | 29.23    | 20.19         | 20.08    | 13.62 | -1.98  |
| Villabruna        | 11.14            | 11.70             | 0.93     | 4.77  | 1.10     | 11.65      | -8.59       | 12.20            | 12.78     | -7.62    | 14.14       | -9.37  | -       | NA         | 35.78  | -3.37  | 10.80      | -3.99        | 12.27  | 18.47   | 42.27     | 32.07    | 33.40         | 29.12    | 18.12 | -2.27  |
| Bichon            | 12.24            | 12.18             | 1.38     | 6.51  | 0.86     | 11.36      | -9.73       | 11.19            | 13.62     | -8.72    | 13.61       | 11.80  | 23.91   | 36.56      | NA     | -4.39  | 11.99      | -5.64        | 12.54  | 19.34   | 41.86     | 35.65    | 32.01         | 30.86    | 18.26 | -3.82  |
| Clovis            | 9.51             | 11.50             | 1.21     | 5.76  | 3.80     | -3.67      | -0.49       | -1.04            | -2.94     | -6.71    | -2.78       | 12.69  | -4.11   | -3.95      | -4.87  | NA     | -6.63      | 21.88        | -5.82  | 14.33   | -7.44     | -6.29    | -6.71         | -9.88    | -5.84 | 20.01  |
| Satsurblia        | 13.75            | 13.66             | 1.52     | 7.93  | 5.31     | -3.62      | 0.76        | -1.21            | -3.23     | -2.23    | -2.25       | -5.74  | -2.39   | -5.89      | -7.55  | -1.32  | NA         | -2.02        | 24.16  | -8.84   | -8.20     | -6.88    | -8.26         | -8.75    | 13.33 | 0.68   |
| Kolyma_River      | 9.70             | 11.18             | 1.97     | 4.98  | 5.34     | -3.48      | -1.34       | -1.51            | -3.34     | -6.29    | -2.65       | 10.93  | -2.96   | -4.49      | -5.59  | 21.98  | -6.63      | NA           | -6.52  | 13.13   | -6.27     | -5.55    | -6.99         | -8.73    | -6.02 | 24.59  |
| Kotias            | 13.18            | 15.11             | 2.28     | 8.10  | 4.60     | -5.15      | -0.89       | -3.00            | -5.02     | -3.45    | -3.42       | -6.86  | -4.96   | -7.85      | -8.74  | -1.53  | 25.62      | -2.94        | NA     | 10.59   | 10.26     | -9.12    | 10.17         | 11.93    | 14.69 | -1.75  |
| Karelia           | 10.24            | 11.86             | 0.36     | 6.06  | 0.37     | -9.24      | -5.94       | -7.84            | -9.88     | -8.78    | -9.78       | 17.91  | 11.59   | 16.80      | 18.26  | 12.39  | 13.54      | 11.97        | 13.69  | NA      | 21.59     | 18.62    | 21.29         | 26.48    | 14.95 | -9.31  |
| Loschbour         | 11.56            | 12.82             | 1.15     | 7.15  | 1.28     | 11.34      | 11.36       | 11.42            | 13.61     | -8.69    | 13.97       | 10.92  | 25.18   | 38.85      | 39.63  | -5.41  | 11.53      | -5.03        | 12.81  | 20.43   | NA        | 36.56    | 34.40         | 33.30    | 19.25 | -3.81  |
| LaBranal          | 11.96            | 12.54             | 0.69     | 6.61  | 1.86     | 10.48      | 11.77       | 11.08            | 13.08     | -8.50    | 12.06       | -9.90  | 25.83   | 31.08      | 34.94  | -4.49  | 10.20      | -4.41        | 12.08  | 17.63   | 38.33     | NA       | 29.65         | 26.68    | 17.19 | -3.43  |
| Hungarian.KO1     | 11.52            | 11.86             | 0.34     | 5.47  | 1.63     | 11.06      | -7.56       | -9.41            | 11.83     | -8.30    | 12.34       | 11.02  | 18.44   | 32.09      | 32.04  | -5.21  | 11.91      | -5.79        | 13.77  | 21.21   | 36.71     | 30.64    | NA            | 30.18    | 20.75 | -4.28  |
| Motala12          | 12.43            | 13.29             | 0.18     | 6.35  | 2.15     | -9.17      | -7.72       | -8.87            | 10.02     | -7.08    | 11.11       | 14.40  | 16.80   | 27.45      | 26.44  | -6.83  | 12.25      | -6.58        | 14.03  | 24.65   | 32.07     | 25.08    | 28.45         | NA       | 18.09 | -4.40  |
| LBK               | 13.14            | 14.70             | 1.68     | 8.49  | 5.33     | -5.56      | -3.00       | -6.35            | -6.82     | -4.19    | -6.31       | -5.13  | -8.06   | 12.51      | 12.65  | -0.68  | 13.57      | -1.54        | 14.39  | 10.59   | 15.19     | 13.54    | 15.66         | 15.34    | NA    | -1.27  |
| Saqqaq            | 8.85             | 11.16             | 1.19     | 4.98  | 5.71     | -2.49      | -0.44       | -1.13            | -2.77     | -6.44    | -1.78       | -8.81  | -2.59   | -3.12      | -4.73  | 20.03  | -5.12      | 24.82        | -6.50  | 11.49   | -5.69     | -5.34    | -5.94         | -7.40    | -7.08 | NA     |

1052 **Table S5.10 Z-scores of the statistics  $D(\text{Bacho Kiro CC7-335}, X; Y \text{ Mbuti})$ .** Standard errors (SE) were computed using a Weighted Block  
 1053 Jackknife<sup>3,12</sup> across all autosomes of the “2200k” Panel and using a block size of 5Mb. Blue: Z-score  $\leq -3$ ; Yellow: Z-score  $\geq 3$ .

| X/Y               | BachoKiro_F6_620 | BachoKiro_BB7_240 | UstIshim | Oase1 | Tianyuan | Kostenki14 | GoyetQ116-1 | BachoKiro_BK1653 | SungshirII | Yana_old2 | Vestonice16 | Malta1 | ElMiron | Villabruna | Bichon | Clovis | Satsurbli | Kolyma_River | Kotias | Karelia | Loschbour | LaBranal | Hungarian.KO1 | Motala12 | LBK   | Saqqaq |
|-------------------|------------------|-------------------|----------|-------|----------|------------|-------------|------------------|------------|-----------|-------------|--------|---------|------------|--------|--------|-----------|--------------|--------|---------|-----------|----------|---------------|----------|-------|--------|
| BachoKiro_F6_620  | NA               | 2.52              | 1.01     | 0.28  | 0.93     | 2.30       | 2.36        | 0.15             | 1.34       | 0.06      | 2.52        | 0.74   | 0.84    | 2.87       | 2.36   | 0.79   | 1.79      | 1.52         | 1.11   | 0.71    | 2.41      | 2.10     | 1.48          | 2.01     | 1.82  | 0.26   |
| BachoKiro_BB7_240 | 1.95             | NA                | 0.09     | 0.97  | 0.73     | 0.01       | -0.94       | -2.01            | -0.91      | -0.53     | -0.09       | 0.15   | -0.07   | 0.53       | -0.45  | -0.49  | 0.24      | 0.40         | -0.72  | -0.59   | -0.68     | 0.26     | -0.52         | -0.40    | 0.33  | -0.94  |
| UstIshim          | 11.04            | 11.00             | NA       | 5.93  | 1.35     | -2.20      | -0.70       | -1.60            | -2.34      | -1.10     | -1.52       | -0.67  | -1.26   | -0.40      | -2.13  | -0.69  | -1.25     | -0.87        | -0.89  | -0.46   | -2.06     | -1.25    | -0.78         | -1.91    | -0.89 | 0.12   |
| Oase1             | 6.88             | 5.55              | 3.34     | NA    | 2.43     | 1.38       | 2.06        | 1.00             | 1.74       | 2.16      | 1.71        | 2.02   | 1.37    | 1.53       | 1.49   | 2.78   | 1.76      | 2.08         | 2.44   | 0.83    | 2.54      | 3.11     | 1.27          | 1.77     | 2.14  | 2.33   |
| Tianyuan          | 9.32             | 9.40              | -        | 3.52  | NA       | -1.49      | -1.83       | -1.30            | -2.64      | -5.44     | -0.65       | -1.78  | -0.98   | -0.53      | -1.94  | -7.18  | -0.59     | -7.52        | -1.41  | -3.23   | -2.10     | -1.82    | -2.24         | -2.05    | -0.14 | -8.08  |
| Kostenki14        | 13.68            | 12.01             | 1.00     | 4.86  | 1.79     | NA         | -8.97       | -                | -          | -9.84     | -           | -7.68  | -9.96   | -          | -      | -1.98  | -6.39     | -1.52        | -7.41  | -9.96   | -         | -        | -             | -        | -8.60 | -1.18  |
| GoyetQ116-1       | 10.51            | 7.96              | 2.59     | 2.43  | -        | -          | NA          | -                | -          | -         | -           | -8.70  | -       | -          | -      | -3.38  | -6.33     | -4.07        | -8.63  | 11.30   | 17.05     | 16.81    | 12.49         | 13.57    | 11.38 | -2.75  |
| BachoKiro_BK1653  | 11.31            | 10.34             | 0.74     | 5.57  | 2.65     | 10.45      | 10.12       | NA               | 10.94      | -7.30     | 13.76       | -5.34  | 11.43   | 11.98      | 11.70  | -0.83  | -4.14     | -0.36        | -6.24  | -8.73   | 12.38     | 12.21    | 10.47         | 10.68    | -9.74 | -0.45  |
| SungshirII        | 13.39            | 12.46             | 0.82     | 5.07  | 0.61     | 15.78      | -8.56       | 12.18            | NA         | -7.43     | 18.09       | -7.48  | 11.00   | 11.84      | 13.99  | -1.79  | -6.18     | -1.97        | -7.95  | 10.54   | 13.46     | 13.09    | 12.54         | 11.28    | -9.89 | -1.28  |
| Yana_old2         | 11.81            | 11.58             | 0.20     | 5.19  | 2.40     | 10.07      | -6.31       | -8.30            | -8.00      | NA        | -8.79       | -9.65  | -7.27   | -6.64      | -8.77  | -6.23  | -4.98     | -5.21        | -6.41  | -9.76   | -9.25     | -8.45    | -9.00         | -8.53    | -7.10 | -5.75  |
| Vestonice16       | 12.42            | 10.46             | 1.80     | 4.01  | 0.97     | 14.48      | -9.55       | 16.46            | 20.06      | 10.74     | NA          | -9.22  | 14.67   | 16.24      | 15.37  | -2.80  | -6.51     | -2.40        | -8.65  | -       | -         | -        | -             | -        | -     | -2.14  |
| Malta1            | 11.46            | 10.86             | 0.97     | 4.21  | -        | -9.30      | -6.84       | -8.13            | -9.46      | -         | -           | NA     | -7.62   | -8.89      | -      | -      | -         | -            | -      | -       | -         | -        | -             | -        | -     | -9.09  |
| ElMiron           | 10.60            | 10.47             | 1.56     | 3.16  | 0.32     | 12.58      | 17.40       | 14.52            | 13.38      | -9.30     | 15.13       | -7.99  | NA      | -          | -      | -      | -         | -            | -      | -       | -         | -        | -             | -        | -     | -2.95  |
| Villabruna        | 13.20            | 11.92             | 0.29     | 4.20  | 1.50     | 12.14      | -9.03       | 13.65            | 13.26      | -7.98     | 15.08       | -8.62  | 20.36   | NA         | 37.03  | -3.32  | -9.68     | -3.59        | 11.78  | 19.07   | 39.86     | 32.15    | 34.90         | 28.54    | 17.54 | -2.12  |
| Bichon            | 13.76            | 11.74             | 0.89     | 5.12  | 0.79     | 12.74      | 10.40       | 13.48            | 14.45      | -9.03     | 14.06       | 10.67  | 23.35   | 36.62      | NA     | -4.54  | 10.88     | -4.60        | 12.40  | 19.20   | 40.98     | 35.69    | 32.07         | 28.77    | 17.05 | -4.21  |
| Clovis            | 11.54            | 10.63             | 0.60     | 5.26  | 4.59     | -3.52      | -1.38       | -3.19            | -3.37      | -7.09     | -2.85       | 11.92  | -4.48   | -3.86      | -5.34  | NA     | -6.19     | 21.79        | -6.14  | 15.12   | -6.68     | -6.42    | -7.05         | 10.31    | -4.95 | 20.41  |
| Satsurbli         | 15.43            | 14.99             | 2.45     | 6.85  | 4.19     | -4.04      | -0.64       | -3.01            | -4.10      | -1.98     | -2.38       | -4.90  | -2.69   | -6.26      | -8.25  | -2.06  | NA        | -1.47        | 24.76  | -9.39   | -8.66     | -7.47    | -9.00         | -8.89    | 12.81 | -0.37  |
| Kolyma_River      | 12.09            | 11.65             | 1.33     | 4.13  | 6.06     | -3.36      | -2.32       | -3.86            | -4.05      | -6.81     | -2.65       | 10.90  | -3.93   | -4.27      | -6.11  | -      | -6.36     | NA           | -6.87  | -       | -5.94     | -5.30    | -7.27         | -8.48    | -4.78 | 24.48  |
| Kotias            | 15.03            | 14.67             | 3.19     | 7.91  | 4.61     | -4.32      | -1.83       | -4.32            | -5.09      | -2.87     | -3.62       | -5.98  | -4.80   | -7.21      | -8.84  | -1.53  | -         | -1.59        | NA     | 10.40   | -9.29     | -8.53    | -9.62         | 10.55    | 13.98 | -1.91  |
| Karelia           | 13.00            | 11.48             | 1.19     | 5.26  | 0.14     | -9.50      | -6.98       | -9.63            | 10.38      | -9.45     | -9.79       | 18.31  | 11.60   | 17.20      | 19.05  | 12.86  | 11.76     | 11.51        | 13.46  | NA      | 19.73     | 18.66    | 21.54         | 26.14    | 13.99 | -9.51  |
| Loschbour         | 14.00            | 12.63             | 0.57     | 5.71  | 1.11     | 12.16      | 12.26       | 14.50            | 14.05      | -9.15     | 14.73       | 10.38  | 24.95   | 39.05      | 42.52  | -5.86  | 11.14     | -4.21        | 12.89  | 20.74   | NA        | 37.32    | 35.09         | 31.18    | 18.45 | -3.94  |
| LaBranal          | 13.66            | 12.45             | 0.17     | 6.27  | 1.32     | 11.39      | 13.22       | 13.64            | 13.90      | -8.95     | 12.63       | -9.19  | 27.08   | 33.15      | 36.21  | -5.51  | 10.13     | -3.84        | 12.11  | 19.23   | 38.03     | NA       | 30.22         | 27.96    | 17.17 | -4.26  |
| Hungarian.KO1     | 12.87            | 11.63             | 0.67     | 4.43  | 1.42     | 10.73      | -8.22       | 11.63            | 12.39      | -8.05     | 12.48       | -9.68  | 17.65   | 31.76      | 31.32  | -4.97  | 10.74     | -4.70        | 12.85  | 21.12   | 33.89     | 28.81    | NA            | 27.21    | 18.28 | -4.03  |
| Motala12          | 14.56            | 13.14             | 0.45     | 5.35  | 2.08     | 10.24      | -8.58       | 11.26            | 10.68      | -7.65     | 11.72       | 13.24  | 16.45   | 26.65      | 27.73  | -7.53  | 10.81     | -5.86        | 13.88  | 25.70   | 30.31     | 26.02    | 27.39         | NA       | 17.29 | -4.29  |
| LBK               | 15.66            | 15.65             | 2.74     | 7.69  | 5.46     | -5.73      | -4.07       | -8.41            | -7.17      | -3.82     | -6.48       | -4.06  | -8.11   | -          | -      | -0.79  | -         | -0.07        | 14.93  | 11.52   | 14.02     | 12.59    | 14.95         | 14.10    | NA    | -0.89  |
| Saqqaq            | 11.08            | 10.45             | 0.18     | 4.72  | 6.10     | -2.71      | -1.04       | -3.55            | -3.11      | -7.17     | -1.68       | -9.12  | -2.88   | -2.66      | -5.36  | -      | -4.61     | -            | -      | 11.56   | -5.29     | -5.61    | -6.02         | -6.87    | -5.37 | NA     |



1054 **Table S5.11 Z-scores of the statistics  $D(\text{Bacho Kiro BK1653}, X; Y \text{ Mbuti})$ .** Standard errors (SE) were computed using a Weighted Block Jackknife<sup>3,12</sup>  
 1055 across all autosomes of the “2200k” Panel and using a block size of 5Mb. Blue: Z-score  $\leq -3$ ; Yellow: Z-score  $\geq 3$ .

| X/Y               | BachoKiro_F6_6<br>20 | BachoKiro_BB7<br>240 | BachoKiro_CC7<br>335 | UstIshim | OaseI | Tianyuan | Kostenki14 | GoyetQ116-I | SunghirIII | Yana_old | Vestonice16 | Malta1 | EIMiron | Villabruna | Bichon | Clovis | Satsurbliia | Kolyma_River | Kotias | Karelia | Loschbour | LaBramaI | Hungarian.KO1 | Motala12 | LBK   | Saqqaq |
|-------------------|----------------------|----------------------|----------------------|----------|-------|----------|------------|-------------|------------|----------|-------------|--------|---------|------------|--------|--------|-------------|--------------|--------|---------|-----------|----------|---------------|----------|-------|--------|
| BachoKiro_F6_620  | NA                   | -8.50                | 11.46                | 0.18     | 5.52  | 0.98     | 13.16      | 13.34       | 12.38      | 7.61     | 17.39       | 7.00   | 14.48   | 15.82      | 15.72  | 1.84   | 7.28        | 2.06         | 7.82   | 10.02   | 15.60     | 16.72    | 13.01         | 13.83    | 12.34 | 0.55   |
| BachoKiro_BB7_240 | 10.69                | NA                   | 12.45                | 0.60     | 6.31  | 3.07     | 11.26      | 9.89        | 11.36      | 7.10     | 13.61       | 6.45   | 11.93   | 12.41      | 11.58  | 0.61   | 5.04        | 1.09         | 6.56   | 9.19    | 13.26     | 12.79    | 10.12         | 10.88    | 10.93 | -0.34  |
| BachoKiro_CC7_335 | 11.31                | 10.34                | NA                   | 0.74     | 5.57  | 2.65     | 10.45      | 10.12       | 10.94      | 7.30     | 13.76       | 5.34   | 11.43   | 11.98      | 11.70  | 0.83   | 4.14        | 0.36         | 6.24   | 8.73    | 12.38     | 12.21    | 10.47         | 10.68    | 9.74  | 0.45   |
| UstIshim          | -0.91                | 0.11                 | -2.24                | NA       | 0.07  | 1.05     | 9.13       | 9.93        | 9.58       | 6.37     | 13.33       | 5.26   | 12.42   | 12.77      | 11.52  | 0.51   | 3.80        | -0.22        | 5.73   | 9.84    | 12.46     | 13.21    | 12.00         | 10.53    | 9.32  | 0.51   |
| OaseI             | -3.33                | -4.24                | -4.18                | 2.28     | NA    | 0.43     | 11.87      | 11.80       | 11.53      | 8.32     | 15.02       | 7.46   | 12.62   | 11.89      | 13.70  | 2.30   | 5.08        | 2.26         | 7.80   | 9.42    | 14.52     | 12.98    | 10.09         | 11.06    | 10.24 | 2.29   |
| Tianyuan          | -2.63                | -1.94                | -4.13                | 1.33     | 2.03  | NA       | 10.70      | 9.74        | 9.04       | 2.58     | 14.92       | 4.11   | 11.78   | 12.36      | 10.88  | -6.10  | 4.61        | -7.26        | 5.12   | 6.54    | 11.69     | 12.26    | 10.37         | 9.97     | 10.10 | -8.29  |
| Kostenki14        | 0.56                 | 0.80                 | -1.37                | 2.20     | 0.25  | 0.10     | NA         | 2.27        | -5.26      | 2.02     | 1.98        | -1.88  | 2.41    | 2.58       | 1.59   | -1.22  | -2.09       | -1.10        | -1.37  | 0.25    | 0.96      | 2.06     | 0.54          | 1.45     | 2.08  | -0.64  |
| GoyetQ116-I       | -1.99                | -3.41                | -4.20                | 4.10     | 2.38  | 4.18     | -1.08      | NA          | -1.18      | 2.36     | 2.73        | -2.84  | -8.14   | 0.66       | -1.19  | -2.05  | -1.81       | -3.29        | -1.95  | -0.88   | -2.87     | -3.68    | -1.11         | -1.24    | 0.62  | -3.39  |
| SunghirIII        | -0.15                | 0.40                 | -1.13                | 2.28     | 0.69  | 2.19     | -5.24      | 2.01        | NA         | 0.38     | -3.03       | -1.81  | 1.28    | 1.35       | -0.84  | -1.09  | -2.33       | -1.64        | -2.19  | -0.92   | -1.18     | -0.21    | -1.52         | 0.21     | 0.38  | -1.71  |
| Yana_old          | -1.81                | 0.52                 | -1.48                | 1.51     | 0.29  | 5.30     | 2.11       | 4.79        | 4.32       | NA       | 6.89        | -4.28  | 6.23    | 6.15       | 5.27   | -5.51  | -0.25       | -5.09        | -0.04  | -0.04   | 4.32      | 5.19     | 3.22          | 3.44     | 4.23  | -5.94  |
| Vestonice16       | 0.30                 | -0.61                | -2.30                | 2.37     | 0.52  | 1.23     | -3.66      | 1.48        | -8.08      | 2.59     | NA          | -3.15  | -1.99   | -2.79      | -2.63  | -1.53  | -2.07       | -1.65        | -1.99  | -2.03   | -3.90     | -1.38    | -3.98         | -2.24    | -0.15 | -1.43  |
| Malta1            | -1.10                | 0.03                 | -2.89                | 2.77     | 1.47  | 3.49     | 2.34       | 4.06        | 2.71       | 3.85     | 6.19        | NA     | 4.39    | 3.68       | 1.70   | 12.94  | -3.96       | 10.48        | -4.45  | -       | 1.41      | 2.68     | -0.83         | -5.23    | 1.67  | -9.30  |
| EIMiron           | -1.22                | -0.69                | -2.76                | 1.58     | 1.41  | 2.15     | -0.73      | -7.10       | -1.68      | 1.00     | 0.03        | -1.47  | NA      | -          | -      | -3.87  | -2.32       | -2.71        | -4.26  | -4.91   | -         | -        | -             | -8.67    | -3.03 | -3.14  |
| Villabruna        | 0.16                 | -0.43                | -2.43                | 1.64     | 2.53  | 1.62     | 0.01       | 2.43        | -0.94      | 0.67     | 0.49        | -2.64  | -9.86   | NA         | 26.05  | -3.11  | -6.08       | -3.24        | -6.57  | -9.70   | 16.04     | 16.89    | 10.69         | -        | -     | -2.92  |
| Bichon            | 1.07                 | 0.20                 | -1.79                | 2.12     | 0.65  | 1.92     | 0.16       | 1.02        | -2.02      | 0.34     | 1.18        | -4.11  | 12.08   | 24.52      | NA     | -3.80  | -7.50       | -4.57        | -6.75  | 10.22   | 29.10     | 21.73    | 23.06         | 18.35    | -6.88 | -4.19  |
| Clovis            | -1.83                | -0.45                | -2.66                | 2.13     | 1.81  | 7.90     | 8.71       | 11.23       | 9.17       | 1.20     | 13.06       | -6.36  | 8.86    | 9.61       | 8.39   | NA     | -1.06       | 21.49        | 0.63   | -4.69   | 7.71      | 8.39     | 4.96          | 2.02     | 6.02  | 21.17  |
| Satsurbliia       | 3.90                 | 3.71                 | 1.22                 | 1.42     | 1.64  | 2.97     | 7.52       | 11.17       | 7.91       | 6.36     | 12.55       | 1.47   | 10.26   | 6.36       | 5.18   | -1.08  | NA          | -0.42        | 19.17  | -0.11   | 4.68      | 7.04     | 2.37          | 2.83     | -1.92 | 0.16   |
| Kolyma_River      | -2.02                | -0.42                | -3.41                | 3.11     | 2.67  | 9.62     | 8.65       | 10.13       | 8.35       | 1.45     | 13.85       | -4.50  | 9.82    | 9.80       | 7.72   | 21.97  | -1.18       | NA           | -0.37  | -3.86   | 8.10      | 9.15     | 5.01          | 3.16     | 6.20  | 26.61  |
| Kotias            | 2.63                 | 3.17                 | 1.52                 | 1.84     | 1.83  | 1.73     | 7.73       | 9.72        | 6.89       | 5.14     | 12.63       | -0.02  | 8.03    | 6.04       | 4.46   | -0.90  | 21.17       | -1.49        | NA     | -0.98   | 3.98      | 4.78     | 1.75          | 0.50     | -3.75 | -1.63  |
| Karelia           | 0.02                 | 0.85                 | -1.05                | 0.14     | 0.20  | 2.69     | 2.92       | 4.71        | 2.00       | 1.18     | 6.01        | 12.70  | 1.42    | -4.46      | -5.88  | 12.19  | -8.28       | 12.01        | -7.75  | NA      | -6.97     | -5.15    | -9.66         | 14.46    | -3.42 | 10.20  |
| Loschbour         | 0.69                 | 0.84                 | -1.48                | 2.10     | 0.18  | 1.93     | -0.52      | -0.92       | -2.47      | 1.27     | 0.20        | -4.46  | 14.15   | 26.37      | 29.39  | -5.21  | -7.47       | -4.03        | -7.58  | 12.21   | NA        | 25.94    | 25.40         | 21.39    | -8.01 | -4.42  |
| LaBramaI          | 0.89                 | 0.79                 | -1.34                | 1.51     | 0.17  | 1.19     | 0.26       | -1.35       | -1.65      | 0.79     | 2.43        | -3.84  | 13.94   | 18.70      | 22.82  | -4.25  | -5.25       | -3.89        | -6.57  | 10.11   | 24.34     | NA       | 19.30         | 15.47    | -5.44 | -4.43  |
| Hungarian.KO1     | 0.86                 | 0.82                 | -1.07                | 0.22     | 0.68  | 1.32     | 0.77       | 2.89        | -0.85      | 0.14     | 1.86        | -4.58  | -7.00   | 21.07      | 21.15  | -4.66  | -6.94       | -5.17        | -7.48  | 12.67   | 23.77     | 18.44    | NA            | 19.19    | -8.98 | -4.62  |
| Motala12          | 1.35                 | 1.37                 | -0.63                | 1.37     | 0.50  | 1.22     | 2.49       | 3.40        | 1.30       | 0.12     | 4.07        | -8.62  | -4.34   | 15.10      | 15.61  | -7.40  | -7.41       | -6.59        | -8.28  | 16.95   | 17.94     | 12.82    | 17.86         | NA       | -7.60 | -6.02  |
| LBK               | 2.47                 | 3.85                 | 1.19                 | 1.23     | 1.81  | 2.42     | 6.54       | 8.93        | 5.26       | 4.78     | 10.27       | 1.95   | 5.26    | 1.13       | 0.16   | -0.06  | -8.59       | 0.24         | -8.55  | -1.16   | -0.61     | 1.86     | -3.86         | -2.79    | NA    | -1.11  |
| Saqqaq            | -2.89                | -1.56                | -3.25                | 1.85     | 1.75  | 9.78     | 9.27       | 10.59       | 8.83       | 0.90     | 14.56       | -2.43  | 10.78   | 10.98      | 8.62   | 20.57  | 0.19        | 25.59        | 0.01   | -1.60   | 8.33      | 8.81     | 5.53          | 4.39     | 5.02  | NA     |

1056 **Table S5.12 Z-scores of the statistics  $D(X,Y; \text{Bacho Kiro F6-620, Mbuti})$ .** Standard errors (SE) were computed using a Weighted Block Jackknife<sup>3,12</sup>  
 1057 across all autosomes of the “2200k” Panel and using a block size of 5Mb. Blue: Z-score  $\leq -3$ ; Yellow: Z-score  $\geq 3$ .

| X/Y               | BachoKiro_BB7_240 | BachoKiro_CC7_335 | UstIshim | OaseI | Tianyuan | Kostenki14 | GoyetQ116-I | BachoKiro_BK_1653 | SunghirII | Yana_old | Vestonice16 | Malta1 | ElMiron | Villabruna | Bichon | Clovis | Satsurblia | Kolyma_River | Kotias | Karelia | Loschbour | LaBranal | Hungarian.KO1 | Motala12 | LBK   | Saqqaq |       |
|-------------------|-------------------|-------------------|----------|-------|----------|------------|-------------|-------------------|-----------|----------|-------------|--------|---------|------------|--------|--------|------------|--------------|--------|---------|-----------|----------|---------------|----------|-------|--------|-------|
| BachoKiro_BB7_240 | NA                | -1.95             | 9.42     | 5.28  | 8.56     | 11.45      | 9.13        | 10.69             | 11.59     | 9.71     | 10.79       | 10.01  | 10.16   | 11.14      | 12.24  | 9.51   | 13.75      | 9.70         | 13.18  | 10.24   | 11.56     | 11.96    | 11.52         | 12.43    | 13.14 | 8.85   |       |
| BachoKiro_CC7_335 | 1.95              | NA                | 11.04    | 6.88  | 9.32     | 13.68      | 10.51       | 11.31             | 13.39     | 12.14    | 12.42       | 11.46  | 10.60   | 13.20      | 13.76  | 11.54  | 15.43      | 12.09        | 15.03  | 13.00   | 14.00     | 13.66    | 12.87         | 14.56    | 15.66 | 11.08  |       |
| UstIshim          | -9.42             | 11.04             | NA       | 2.92  | 2.26     | -          | 1.94        | -0.16             | 0.91      | 1.09     | -0.50       | 1.57   | 0.19    | 0.55       | 1.61   | 2.06   | -1.09      | 4.73         | -1.11  | 3.47    | 0.68      | 1.99     | 1.83          | 1.41     | 2.20  | 3.37   | -1.81 |
| OaseI             | -5.28             | -6.88             | 2.92     | NA    | 0.94     | 4.26       | 2.20        | 3.33              | 3.88      | 2.38     | 3.37        | 2.39   | 3.01    | 3.74       | 4.97   | 2.31   | 7.11       | 2.78         | 5.67   | 3.60    | 5.30      | 4.92     | 3.87          | 4.47     | 6.47  | 2.28   |       |
| Tianyuan          | -8.56             | -9.32             | 2.26     | 0.94  | NA       | 4.21       | 1.85        | 2.63              | 3.33      | 1.58     | 3.29        | 2.06   | 2.74    | 3.68       | 4.45   | 1.34   | 6.99       | 1.54         | 6.13   | 3.32    | 4.21      | 4.32     | 4.17          | 4.34     | 5.93  | 0.61   |       |
| Kostenki14        | -                 | -                 | -1.94    | -     | -        | NA         | -3.24       | -0.56             | -0.87     | -2.72    | -0.83       | -2.07  | -2.00   | -0.84      | 0.19   | -3.26  | 2.93       | -3.07        | 2.21   | -1.44   | 0.26      | -0.07    | -0.32         | 0.24     | 1.91  | -3.96  |       |
| GoyetQ116-I       | 11.45             | 13.68             | 4.26     | 4.21  | -        | -          | -           | -                 | -         | -        | -           | -      | -       | -          | -      | -      | -          | -            | -      | -       | -         | -        | -             | -        | -     | -      |       |
| BachoKiro_BK_1653 | -9.13             | 10.51             | 0.16     | 2.20  | 1.85     | 3.24       | NA          | 1.99              | 2.08      | 0.15     | 2.63        | 0.80   | 1.59    | 2.40       | 3.03   | -0.07  | 5.74       | -0.43        | 5.20   | 1.41    | 3.06      | 2.94     | 2.36          | 2.77     | 5.04  | -1.03  |       |
| SunghirII         | 10.69             | 11.31             | -0.91    | 3.33  | 2.63     | 0.56       | -1.99       | NA                | -0.15     | -1.71    | 0.30        | -1.10  | -1.22   | 0.16       | 1.07   | -1.83  | 3.90       | -2.02        | 2.63   | 0.02    | 0.69      | 0.89     | 0.86          | 1.35     | 2.47  | -2.89  |       |
| Yana_old          | 11.59             | 13.39             | -1.09    | 3.88  | 3.33     | 0.87       | -2.08       | 0.15              | NA        | -1.78    | 0.32        | -1.06  | -0.41   | 0.46       | 1.16   | -2.36  | 4.14       | -2.43        | 2.76   | -0.59   | 1.06      | 0.89     | 0.65          | 1.38     | 2.61  | -3.12  |       |
| Vestonice16       | -9.71             | 12.14             | 0.50     | 2.38  | 1.58     | 2.72       | -0.15       | 1.71              | 1.78      | NA       | 2.00        | 0.62   | 1.33    | 2.45       | 2.96   | -0.59  | 5.44       | -0.63        | 4.39   | 1.35    | 2.84      | 2.66     | 2.60          | 3.06     | 4.23  | -1.38  |       |
| Malta1            | 10.79             | 12.42             | -1.57    | 3.37  | 3.29     | 0.83       | -2.63       | -0.30             | -0.32     | -2.00    | NA          | -1.07  | -0.95   | -0.14      | 0.73   | -2.19  | 4.04       | -2.32        | 2.66   | -0.74   | 0.60      | 0.78     | 0.98          | 0.84     | 2.60  | -2.97  |       |
| ElMiron           | 10.01             | 11.46             | -0.19    | 2.39  | 2.06     | 2.07       | -0.80       | 1.10              | 1.06      | -0.62    | 1.07        | NA     | 1.07    | 1.40       | 2.05   | -1.37  | 4.50       | -1.27        | 3.98   | 0.56    | 1.99      | 2.07     | 1.67          | 2.22     | 3.75  | -2.52  |       |
| Villabruna        | 10.16             | 10.60             | -0.55    | 3.01  | 2.74     | 2.00       | -1.59       | 1.22              | 0.41      | -1.33    | 0.95        | -1.07  | NA      | 1.05       | 2.07   | -1.55  | 4.15       | -1.44        | 3.94   | 0.36    | 1.51      | 2.03     | 2.02          | 1.94     | 4.13  | -2.29  |       |
| Bichon            | 11.14             | 13.20             | -1.61    | 3.74  | 3.68     | 0.84       | -2.40       | -0.16             | -0.46     | -2.45    | 0.14        | -1.40  | -1.05   | NA         | 0.82   | -2.61  | 3.61       | -2.94        | 2.91   | -1.14   | 0.49      | 0.85     | 0.28          | 1.10     | 2.66  | -3.34  |       |
| Clovis            | 12.24             | 13.76             | -2.06    | 4.97  | 4.45     | -0.19      | -3.03       | -1.07             | -1.16     | -2.96    | -0.73       | -2.05  | -2.07   | -0.82      | NA     | -3.68  | 2.84       | -3.77        | 1.89   | -1.87   | -0.17     | -0.48    | -0.58         | 0.15     | 1.56  | -4.29  |       |
| Satsurblia        | -9.51             | 11.54             | 1.09     | 2.31  | 1.34     | 3.26       | 0.07        | 1.83              | 2.36      | 0.59     | 2.19        | 1.37   | 1.55    | 2.61       | 3.68   | NA     | 6.39       | -0.05        | 5.45   | 2.19    | 3.68      | 3.53     | 3.16          | 3.78     | 5.41  | -1.12  |       |
| Kolyma_River      | 13.75             | 15.43             | -4.73    | 7.11  | 6.99     | -2.93      | -5.74       | -3.90             | -4.14     | -5.44    | -4.04       | -4.50  | -4.15   | -3.61      | -2.84  | -6.39  | NA         | -6.56        | -1.53  | -5.20   | -3.21     | -3.11    | -3.39         | -3.09    | -1.76 | -7.32  |       |
| Kotias            | -9.70             | 12.09             | 1.11     | 2.78  | 1.54     | 3.07       | 0.43        | 2.02              | 2.43      | 0.63     | 2.32        | 1.27   | 1.44    | 2.94       | 3.77   | 0.05   | 6.56       | NA           | 5.21   | 2.08    | 3.61      | 3.47     | 3.26          | 3.86     | 5.29  | -1.18  |       |
| Karelia           | -                 | -                 | -3.47    | -     | -        | -2.21      | -5.20       | -2.63             | -2.76     | -4.39    | -2.66       | -3.98  | -3.94   | -2.91      | -1.89  | -5.45  | 1.53       | -5.21        | NA     | -4.00   | -1.85     | -2.32    | -2.67         | -1.96    | -0.35 | -6.12  |       |
| Loschbour         | 13.18             | 15.03             | 5.67     | 6.13  | -        | -          | -           | -                 | -         | -        | -           | -      | -       | -          | -      | -      | -          | -            | -      | -       | -         | -        | -             | -        | -     | -      |       |
| LaBranal          | 10.24             | 13.00             | -0.68    | 3.60  | 3.32     | 1.44       | -1.41       | -0.02             | 0.59      | -1.35    | 0.74        | -0.56  | -0.36   | 1.14       | 1.87   | -2.19  | 5.20       | -2.08        | 4.00   | NA      | 1.72      | 1.70     | 1.51          | 1.93     | 3.46  | -2.99  |       |
| Hungarian.KO1     | 11.56             | 14.00             | -1.99    | 5.30  | 4.21     | -0.26      | -3.06       | -0.69             | -1.06     | -2.84    | -0.60       | -1.99  | -1.51   | -0.49      | 0.17   | -3.68  | 3.21       | -3.61        | 1.85   | -1.72   | NA        | -0.17    | -0.61         | 0.31     | 1.70  | -4.46  |       |
| Motala12          | 11.96             | 13.66             | -1.83    | 4.92  | 4.32     | 0.07       | -2.94       | -0.89             | -0.89     | -2.66    | -0.78       | -2.07  | -2.03   | -0.85      | 0.48   | -3.53  | 3.11       | -3.47        | 2.32   | -1.70   | 0.17      | NA       | -0.34         | 0.47     | 1.92  | -4.27  |       |
| LBK               | 11.52             | 12.87             | -1.41    | 3.87  | 4.17     | 0.32       | -2.36       | -0.86             | -0.65     | -2.60    | -0.98       | -1.67  | -2.02   | -0.28      | 0.58   | -3.16  | 3.39       | -3.26        | 2.67   | -1.51   | 0.61      | 0.34     | NA            | 0.58     | 2.19  | -4.01  |       |
| Saqqaq            | 12.43             | 14.56             | -2.20    | 4.47  | 4.34     | -0.24      | -2.77       | -1.35             | -1.38     | -3.06    | -0.84       | -2.22  | -1.94   | -1.10      | -0.15  | -3.78  | 3.09       | -3.86        | 1.96   | -1.93   | -0.31     | -0.47    | -0.58         | NA       | 1.86  | -4.47  |       |
|                   | 13.14             | 15.66             | -3.37    | 6.47  | 5.93     | -1.91      | -5.04       | -2.47             | -2.61     | -4.23    | -2.60       | -3.75  | -4.13   | -2.66      | -1.56  | -5.41  | 1.76       | -5.29        | 0.35   | -3.46   | -1.70     | -1.92    | -2.19         | -1.86    | NA    | -6.14  |       |
|                   | -8.85             | 11.08             | 1.81     | 2.28  | 0.61     | 3.96       | 1.03        | 2.89              | 3.12      | 1.38     | 2.97        | 2.52   | 2.29    | 3.34       | 4.29   | 1.12   | 7.32       | 1.18         | 6.12   | 2.99    | 4.46      | 4.27     | 4.01          | 4.47     | 6.14  | NA     |       |

1058 **Table S5.13 Z-scores of the statistics  $D(X,Y; \text{Bacho Kiro BB7-240, Mbuti})$ .** Standard errors (SE) were computed using a Weighted Block  
 1059 Jackknife<sup>3,12</sup> across all autosomes of the “2200k” Panel and using a block size of 5Mb. Blue: Z-score  $\leq -3$ ; Yellow: Z-score  $\geq 3$ .

| X/Y               | BachoKiro_F6_620 | BachoKiro_CC7_335 | UstIshim | Oase1 | Tianyuan | Kostenki14 | GoyetQ116-1 | BachoKiro_BK_1653 | SunghirIII | Yana_old | Vestonice16 | Malta1 | ElMiron | Villabruna | Bichon | Clovis | Satsurbli | Kolyma_River | Kotias | Karelia | Loschbour | LaBranal | Hungarian.KO1 | Motala12 | LBK   | Saqqaq |
|-------------------|------------------|-------------------|----------|-------|----------|------------|-------------|-------------------|------------|----------|-------------|--------|---------|------------|--------|--------|-----------|--------------|--------|---------|-----------|----------|---------------|----------|-------|--------|
| BachoKiro_F6_620  | NA               | -2.52             | 8.67     | 4.64  | 6.79     | 8.98       | 5.77        | 8.50              | 9.14       | 9.48     | 7.73        | 9.25   | 7.80    | 8.39       | 8.66   | 8.41   | 12.59     | 8.91         | 11.61  | 9.56    | 9.40      | 9.65     | 9.54          | 10.64    | 12.58 | 8.26   |
| BachoKiro_CC7_335 | 2.52             | NA                | 11.00    | 5.55  | 9.40     | 12.01      | 7.96        | 10.34             | 12.46      | 11.58    | 10.46       | 10.86  | 10.47   | 11.92      | 11.74  | 10.63  | 14.99     | 11.65        | 14.67  | 11.48   | 12.63     | 12.45    | 11.63         | 13.14    | 15.65 | 10.45  |
| UstIshim          | -8.67            | 11.00             | NA       | -3.91 | -2.38    | 0.59       | -2.97       | -0.11             | -0.02      | 0.37     | -0.51       | -0.15  | -0.94   | -0.28      | -0.34  | -0.86  | 3.53      | -0.22        | 2.76   | 0.45    | 0.55      | 0.74     | 0.53          | 1.37     | 3.36  | -1.21  |
| Oase1             | -4.64            | -5.55             | 3.91     | NA    | 1.52     | 3.95       | 1.01        | 4.24              | 3.88       | 3.84     | 2.65        | 3.12   | 2.47    | 3.25       | 4.11   | 2.84   | 5.73      | 3.66         | 5.71   | 4.70    | 4.32      | 4.33     | 3.75          | 4.95     | 6.69  | 2.84   |
| Tianyuan          | -6.79            | -9.40             | 2.38     | -1.52 | NA       | 3.35       | -0.68       | 1.94              | 2.84       | 2.85     | 1.66        | 2.09   | 1.54    | 2.05       | 2.16   | 1.87   | 6.03      | 2.48         | 5.34   | 3.12    | 3.20      | 3.30     | 2.99          | 3.62     | 6.16  | 1.55   |
| Kostenki14        | -8.98            | 12.01             | -0.59    | -3.95 | -3.35    | NA         | -4.25       | -0.80             | -0.81      | -0.26    | -1.80       | -0.90  | -1.85   | -1.60      | -1.01  | -1.66  | 3.23      | -0.91        | 2.40   | -0.19   | 0.02      | 0.23     | -0.33         | 0.50     | 3.07  | -1.94  |
| GoyetQ116-1       | -5.77            | -7.96             | 2.97     | -1.01 | 0.68     | 4.25       | NA          | 3.41              | 3.46       | 3.61     | 2.46        | 2.71   | 2.91    | 2.98       | 2.98   | 2.48   | 7.15      | 2.65         | 5.97   | 3.73    | 4.04      | 4.39     | 4.03          | 4.33     | 7.62  | 1.98   |
| BachoKiro_BK_1653 | -8.50            | 10.34             | 0.11     | -4.24 | -1.94    | 0.80       | -3.41       | NA                | 0.40       | 0.52     | -0.61       | 0.03   | -0.69   | -0.43      | 0.20   | -0.45  | 3.71      | -0.42        | 3.17   | 0.85    | 0.84      | 0.79     | 0.82          | 1.37     | 3.85  | -1.56  |
| SunghirIII        | -9.14            | 12.46             | 0.02     | -3.88 | -2.84    | 0.81       | -3.46       | -0.40             | NA         | 0.41     | -0.53       | -0.51  | -0.84   | -0.44      | -0.38  | -1.00  | 4.38      | -0.22        | 3.10   | 0.47    | 0.73      | 0.87     | 1.11          | 1.84     | 4.15  | -1.50  |
| Yana_old          | -9.48            | 11.58             | -0.37    | -3.84 | -2.85    | 0.26       | -3.61       | -0.52             | -0.41      | NA       | -1.20       | -0.64  | -1.85   | -0.95      | -0.78  | -1.33  | 3.66      | -0.65        | 2.70   | 0.10    | 0.22      | 0.52     | 0.24          | 0.96     | 3.52  | -1.75  |
| Vestonice16       | -7.73            | 10.46             | 0.51     | -2.65 | -1.66    | 1.80       | -2.46       | 0.61              | 0.53       | 1.20     | NA          | 0.09   | 0.16    | 0.23       | 0.85   | -0.46  | 4.58      | 0.33         | 3.69   | 1.55    | 1.46      | 1.82     | 1.91          | 2.12     | 4.60  | -0.36  |
| Malta1            | -9.25            | 10.86             | 0.15     | -3.12 | -2.09    | 0.90       | -2.71       | -0.03             | 0.51       | 0.64     | -0.09       | NA     | -0.37   | -0.01      | -0.39  | -0.84  | 4.11      | -0.17        | 3.25   | 0.76    | 0.86      | 1.41     | 0.97          | 1.46     | 4.26  | -0.69  |
| ElMiron           | -7.80            | 10.47             | 0.94     | -2.47 | -1.54    | 1.85       | -2.91       | 0.69              | 0.84       | 1.85     | -0.16       | 0.37   | NA      | 0.02       | 0.67   | 0.07   | 4.17      | 0.57         | 3.67   | 1.57    | 1.78      | 1.86     | 1.37          | 2.20     | 5.07  | -0.65  |
| Villabruna        | -8.39            | 11.92             | 0.28     | -3.25 | -2.05    | 1.60       | -2.98       | 0.43              | 0.44       | 0.95     | -0.23       | 0.01   | -0.02   | NA         | 0.21   | -0.63  | 4.64      | -0.35        | 3.61   | 0.91    | 1.14      | 1.73     | 1.51          | 1.87     | 4.79  | -1.01  |
| Bichon            | -8.66            | 11.74             | 0.34     | -4.11 | -2.16    | 1.01       | -2.98       | -0.20             | 0.38       | 0.78     | -0.85       | 0.39   | -0.67   | -0.21      | NA     | -0.56  | 4.50      | 0.13         | 3.70   | 1.00    | 1.23      | 1.64     | 1.11          | 2.19     | 4.71  | -0.94  |
| Clovis            | -8.41            | 10.63             | 0.86     | -2.84 | -1.87    | 1.66       | -2.48       | 0.45              | 1.00       | 1.33     | 0.46        | 0.84   | -0.07   | 0.63       | 0.56   | NA     | 5.59      | 0.84         | 4.21   | 1.78    | 1.69      | 1.97     | 1.82          | 2.59     | 5.17  | -0.35  |
| Satsurbli         | -                | -                 | -3.53    | -5.73 | -6.03    | -3.23      | -7.15       | -3.71             | -4.38      | -3.66    | -4.58       | -4.11  | -4.17   | -4.64      | -4.50  | -5.59  | NA        | -4.73        | -1.24  | -3.87   | -3.90     | -3.27    | -3.62         | -3.60    | -0.46 | -6.03  |
| Kolyma_River      | -8.91            | 11.65             | 0.22     | -3.66 | -2.48    | 0.91       | -2.65       | 0.42              | 0.22       | 0.65     | -0.33       | 0.17   | -0.57   | 0.35       | -0.13  | -0.84  | 4.73      | NA           | 3.41   | 0.86    | 0.90      | 1.11     | 1.04          | 1.79     | 4.27  | -1.36  |
| Kotias            | -                | -                 | -2.76    | -5.71 | -5.34    | -2.40      | -5.97       | -3.17             | -3.10      | -2.70    | -3.69       | -3.25  | -3.67   | -3.61      | -3.70  | -4.21  | 1.24      | -3.41        | NA     | -2.99   | -2.64     | -2.66    | -2.98         | -1.89    | 0.71  | -4.59  |
| Karelia           | -9.56            | 11.48             | -0.45    | -4.70 | -3.12    | 0.19       | -3.73       | -0.85             | -0.47      | -0.10    | -1.55       | -0.76  | -1.57   | -0.91      | -1.00  | -1.78  | 3.87      | -0.86        | 2.99   | NA      | 0.19      | 0.67     | 0.08          | 0.91     | 3.42  | -1.98  |
| Loschbour         | -9.40            | 12.63             | -0.55    | -4.32 | -3.20    | -0.02      | -4.04       | -0.84             | -0.73      | -0.22    | -1.46       | -0.86  | -1.78   | -1.14      | -1.23  | -1.69  | 3.90      | -0.90        | 2.64   | -0.19   | NA        | 0.39     | -0.22         | 0.98     | 3.76  | -2.13  |
| LaBranal          | -9.65            | 12.45             | -0.74    | -4.33 | -3.30    | -0.23      | -4.39       | -0.79             | -0.87      | -0.52    | -1.82       | -1.41  | -1.86   | -1.73      | -1.64  | -1.97  | 3.27      | -1.11        | 2.66   | -0.67   | -0.39     | NA       | -0.29         | 0.56     | 3.35  | -2.29  |
| Hungarian.KO1     | -9.54            | 11.63             | -0.53    | -3.75 | -2.99    | 0.33       | -4.03       | -0.82             | -1.11      | -0.24    | -1.91       | -0.97  | -1.37   | -1.51      | -1.11  | -1.82  | 3.62      | -1.04        | 2.98   | -0.08   | 0.22      | 0.29     | NA            | 1.22     | 4.01  | -1.95  |
| Motala12          | -                | -                 | -1.37    | -4.95 | -3.62    | -0.50      | -4.33       | -1.37             | -1.84      | -0.96    | -2.12       | -1.46  | -2.20   | -1.87      | -2.19  | -2.59  | 3.60      | -1.79        | 1.89   | -0.91   | -0.98     | -0.56    | -1.22         | NA       | 2.79  | -3.23  |
| LBK               | -12.58           | 15.65             | -3.36    | -6.69 | -6.16    | -3.07      | -7.62       | -3.85             | -4.15      | -3.52    | -4.60       | -4.26  | -5.07   | -4.79      | -4.71  | -5.17  | 0.46      | -4.27        | -0.71  | -3.42   | -3.76     | -3.35    | -4.01         | -2.79    | NA    | -5.62  |
| Saqqaq            | -8.26            | 10.45             | 1.21     | -2.84 | -1.55    | 1.94       | -1.98       | 1.56              | 1.50       | 1.75     | 0.36        | 0.69   | 0.65    | 1.01       | 0.94   | 0.35   | 6.03      | 1.36         | 4.59   | 1.98    | 2.13      | 2.29     | 1.95          | 3.23     | 5.62  | NA     |

1060 **Table S5.14 Z-scores of the statistics  $D(X,Y; \text{Bacho Kiro CC7-335, Mbuti})$ .** Standard errors (SE) were computed using a Weighted Block  
 1061 Jackknife<sup>3,12</sup> across all autosomes of the “2200k” Panel and using a block size of 5Mb. Blue: Z-score  $\leq -3$ ; Yellow: Z-score  $\geq 3$ .

| X/Y               | BachoKiro_F6_620 | BachoKiro_BB7_240 | UstIshim | OaseI | Tianyuan | Kostenki14 | GoyetQ116-1 | BachoKiro_BK_1653 | SungshirIII | Yana_old | Vestonice16 | Malta1 | ElMiron | Villabruna | Bichon | Clovis | Satsurblia | Kolyma_River | Kotias | Karelia | Loschbour | LaBranai | Hungarian.KO1 | Motala12 | LBK   | Saqqaq |
|-------------------|------------------|-------------------|----------|-------|----------|------------|-------------|-------------------|-------------|----------|-------------|--------|---------|------------|--------|--------|------------|--------------|--------|---------|-----------|----------|---------------|----------|-------|--------|
| BachoKiro_F6_620  | NA               | -0.58             | 9.63     | 6.66  | 8.30     | 11.46      | 7.66        | 11.46             | 11.47       | 11.55    | 9.56        | 10.19  | 9.32    | 10.27      | 11.09  | 10.38  | 12.99      | 9.96         | 14.34  | 11.64   | 11.06     | 11.46    | 11.18         | 12.21    | 13.58 | 10.27  |
| BachoKiro_BB7_240 | 0.58             | NA                | 10.87    | 6.62  | 9.95     | 11.97      | 9.00        | 12.45             | 13.38       | 12.44    | 10.70       | 10.92  | 10.28   | 11.70      | 12.18  | 11.50  | 13.66      | 11.18        | 15.11  | 11.86   | 12.82     | 12.54    | 11.86         | 13.29    | 14.70 | 11.16  |
| UstIshim          | -9.63            | 10.87             | NA       | 2.36  | 1.71     | 1.05       | 1.94        | 2.24              | 1.35        | 0.80     | -0.23       | -0.31  | -0.36   | 0.08       | 1.03   | 0.01   | 3.50       | -0.55        | 3.99   | 1.55    | 1.27      | 0.95     | 1.31          | 2.08     | 3.42  | -0.28  |
| OaseI             | -6.66            | -6.62             | 2.36     | NA    | 1.11     | 3.56       | 0.43        | 4.18              | 3.22        | 3.06     | 2.04        | 2.33   | 1.72    | 2.52       | 3.31   | 2.50   | 4.77       | 2.04         | 5.39   | 4.03    | 2.97      | 2.94     | 3.03          | 3.29     | 5.31  | 2.36   |
| Tianyuan          | -8.30            | -9.95             | 1.71     | 1.11  | NA       | 3.17       | 0.17        | 4.13              | 3.14        | 2.98     | 1.57        | 1.28   | 1.40    | 2.10       | 2.79   | 1.90   | 4.81       | 1.43         | 6.14   | 3.35    | 3.24      | 3.24     | 3.70          | 4.13     | 5.80  | 1.86   |
| Kostenki14        | -                | -                 | -1.05    | 3.56  | 3.17     | NA         | 3.32        | 1.37              | 0.32        | -0.38    | -1.74       | -1.60  | -1.81   | -1.27      | -0.43  | -1.39  | 2.45       | -1.79        | 3.10   | 0.05    | 0.09      | -0.22    | 0.23          | 0.68     | 2.58  | -1.65  |
| GoyetQ116-1       | -7.66            | -9.00             | 1.94     | 0.43  | 0.17     | 3.32       | NA          | 4.20              | 3.31        | 3.28     | 1.97        | 1.33   | 2.48    | 2.24       | 3.37   | 1.89   | 5.50       | 1.55         | 6.77   | 3.26    | 3.69      | 3.51     | 3.58          | 4.11     | 6.24  | 1.58   |
| BachoKiro_BK_1653 | 11.46            | 12.45             | -2.24    | 4.18  | 4.13     | -1.37      | 4.20        | NA                | -1.13       | -1.48    | -2.30       | -2.89  | -2.76   | -2.43      | -1.79  | -2.66  | 1.22       | -3.41        | 1.52   | -1.05   | -1.48     | -1.34    | -1.07         | -0.63    | 1.19  | -3.25  |
| SungshirIII       | 11.47            | 13.38             | -1.35    | 3.22  | 3.14     | -0.32      | 3.31        | 1.13              | NA          | -0.60    | -1.45       | -1.75  | -1.53   | -1.32      | -0.48  | -1.45  | 1.96       | -2.06        | 2.98   | 0.21    | -0.19     | -0.61    | 0.64          | 0.81     | 2.37  | -1.92  |
| Yana_old          | 11.55            | 12.44             | -0.80    | 3.06  | 2.98     | 0.38       | 3.28        | 1.48              | 0.60        | NA       | -1.28       | -1.23  | -1.33   | -1.07      | 0.18   | -0.91  | 3.09       | -1.55        | 3.54   | 0.79    | 0.44      | 0.15     | 0.89          | 1.20     | 2.98  | -1.33  |
| Vestonice16       | -9.56            | 10.70             | 0.23     | 2.04  | 1.57     | 1.74       | 1.97        | 2.30              | 1.45        | 1.28     | NA          | -0.47  | -0.49   | 0.37       | 1.42   | -0.18  | 3.90       | -0.33        | 4.64   | 1.43    | 1.36      | 1.30     | 2.40          | 2.45     | 4.07  | 0.36   |
| Malta1            | -                | -                 | 0.31     | 2.33  | 1.28     | 1.60       | 1.33        | 2.89              | 1.75        | 1.23     | 0.47        | NA     | 0.26    | 0.43       | 1.30   | 0.54   | 4.32       | -0.23        | 4.75   | 1.82    | 1.64      | 1.61     | 2.40          | 2.66     | 4.34  | -0.12  |
| ElMiron           | -9.32            | 10.28             | 0.36     | 1.72  | 1.40     | 1.81       | 2.48        | 2.76              | 1.53        | 1.33     | 0.49        | -0.26  | NA      | 0.78       | 1.41   | 0.29   | 3.90       | -0.06        | 5.30   | 1.63    | 1.63      | 1.22     | 1.42          | 3.02     | 4.28  | -0.13  |
| Villabruna        | 10.27            | 11.70             | -0.08    | 2.52  | 2.10     | 1.27       | 2.24        | 2.43              | 1.32        | 1.07     | -0.37       | -0.43  | -0.78   | NA         | 1.01   | -0.62  | 3.68       | -0.81        | 4.46   | 1.07    | 1.15      | 1.15     | 1.58          | 2.44     | 4.18  | -0.59  |
| Bichon            | 11.09            | 12.18             | -1.03    | 3.31  | 2.79     | 0.43       | 3.37        | 1.79              | 0.48        | -0.18    | -1.42       | -1.30  | -1.41   | -1.01      | NA     | -1.16  | 2.78       | -1.82        | 3.84   | 0.55    | 0.33      | 0.18     | 0.57          | 1.17     | 2.95  | -1.49  |
| Clovis            | 10.38            | 11.50             | -0.01    | 2.50  | 1.90     | 1.39       | 1.89        | 2.66              | 1.45        | 0.91     | 0.18        | -0.54  | -0.29   | 0.62       | 1.16   | NA     | 4.04       | -0.80        | 4.61   | 1.66    | 1.42      | 1.27     | 2.18          | 2.32     | 4.06  | -0.16  |
| Satsurblia        | 12.99            | 13.66             | -3.50    | 4.77  | 4.81     | -2.45      | 5.50        | -1.22             | -1.96       | -3.09    | -3.90       | -4.32  | -3.90   | -3.68      | -2.78  | -4.04  | NA         | -5.11        | 0.64   | -2.32   | -2.52     | -2.48    | -1.71         | -1.77    | -0.27 | -4.36  |
| Kolyma_River      | -9.96            | 11.18             | 0.55     | 2.04  | 1.43     | 1.79       | 1.55        | 3.41              | 2.06        | 1.55     | 0.33        | 0.23   | 0.06    | 0.81       | 1.82   | 0.80   | 5.11       | NA           | 5.25   | 2.14    | 2.09      | 1.86     | 2.56          | 2.79     | 4.65  | 0.31   |
| Kotias            | -                | -                 | -3.99    | 5.39  | 6.14     | -3.10      | 6.77        | -1.52             | -2.98       | -3.54    | -4.64       | -4.75  | -5.30   | -4.46      | -3.84  | -4.61  | -0.64      | -5.25        | NA     | -3.37   | -3.54     | -3.70    | -3.12         | -2.76    | -0.85 | -5.09  |
| Karelia           | 11.64            | 11.86             | -1.55    | 4.03  | 3.35     | -0.05      | 3.26        | 1.05              | -0.21       | -0.79    | -1.43       | -1.82  | -1.63   | -1.07      | -0.55  | -1.66  | 2.32       | -2.14        | 3.37   | NA      | -0.32     | -0.11    | 0.31          | 1.04     | 2.35  | -2.49  |
| Loschbour         | 11.06            | 12.82             | -1.27    | 2.97  | 3.24     | -0.09      | 3.69        | 1.48              | 0.19        | -0.44    | -1.36       | -1.64  | -1.63   | -1.15      | -0.33  | -1.42  | 2.52       | -2.09        | 3.54   | 0.32    | NA        | -0.38    | 0.54          | 1.10     | 2.72  | -1.79  |
| LaBranai          | 11.46            | 12.54             | -0.95    | 2.94  | 3.24     | 0.22       | 3.51        | 1.34              | 0.61        | -0.15    | -1.30       | -1.61  | -1.22   | -1.15      | -0.18  | -1.27  | 2.48       | -1.86        | 3.70   | 0.11    | 0.38      | NA       | 0.83          | 1.03     | 3.02  | -1.62  |
| Hungarian.KO1     | 11.18            | 11.86             | -1.31    | 3.03  | 3.70     | -0.23      | 3.58        | 1.07              | -0.64       | -0.89    | -2.40       | -2.40  | -1.42   | -1.58      | -0.57  | -2.18  | 1.71       | -2.56        | 3.12   | -0.31   | -0.54     | -0.83    | NA            | 0.10     | 1.91  | -2.09  |
| Motala12          | 12.21            | 13.29             | -2.08    | 3.29  | 4.13     | -0.68      | 4.11        | 0.63              | -0.81       | -1.20    | -2.45       | -2.66  | -3.02   | -2.44      | -1.17  | -2.32  | 1.77       | -2.79        | 2.76   | -1.04   | -1.10     | -1.03    | -0.10         | NA       | 1.98  | -2.76  |
| LBK               | -                | -                 | -3.42    | 5.31  | 5.80     | -2.58      | 6.24        | -1.19             | -2.37       | -2.98    | -4.07       | -4.34  | -4.28   | -4.18      | -2.95  | -4.06  | 0.27       | -4.65        | 0.85   | -2.35   | -2.72     | -3.02    | -1.91         | -1.98    | NA    | -4.56  |
| Saqqaq            | 10.27            | 11.16             | 0.28     | 2.36  | 1.86     | 1.65       | 1.58        | 3.25              | 1.92        | 1.33     | -0.36       | 0.12   | 0.13    | 0.59       | 1.49   | 0.16   | 4.36       | -0.31        | 5.09   | 2.49    | 1.79      | 1.62     | 2.09          | 2.76     | 4.56  | NA     |

1062 **Table S5.15 Z-scores of the statistics  $D(X,Y; \text{Bacho Kiro BK1653, Mbuti})$ .** Standard errors (SE) were computed using a Weighted Block Jackknife<sup>3,12</sup>  
 1063 across all autosomes of the “2200k” Panel and using a block size of 5Mb. Blue: Z-score  $\leq -3$ ; Yellow: Z-score  $\geq 3$ .

| X/Y               | BachoKiro_F6_620 | BachoKiro_BB7_240 | BachoKiro_CC7_335 | UstIshim | Oase1 | Tianyuan | Kostenki14 | GoyetQ116-1 | SunghirIII | Yana_old | Vestonice16 | Malta1 | ElMiron | Villabruna | Bichon | Clovis | Satsurbli | Kolyma_River | Kotias | Karelia | Loschbour | LaBranal | Hungarian.KO1 | Motala12 | LBK   | Saqqaq |
|-------------------|------------------|-------------------|-------------------|----------|-------|----------|------------|-------------|------------|----------|-------------|--------|---------|------------|--------|--------|-----------|--------------|--------|---------|-----------|----------|---------------|----------|-------|--------|
| BachoKiro_F6_620  | NA               | -2.36             | 0.15              | -1.23    | 2.00  | -1.68    | 12.26      | 15.82       | 12.37      | 9.21     | 17.39       | 8.32   | 14.87   | 15.03      | 13.67  | -3.68  | -3.16     | -3.99        | -4.66  | 10.18   | 14.08     | 14.75    | 12.29         | 12.05    | -8.89 | -3.37  |
| BachoKiro_BB7_240 | 2.36             | NA                | 2.01              | 0.72     | 1.86  | 0.97     | -9.78      | 13.19       | 10.04      | 6.63     | 14.52       | 6.40   | 12.32   | 12.20      | 11.19  | -1.04  | -1.21     | -1.51        | -3.00  | -7.84   | 11.42     | 11.08    | -9.41         | -8.87    | -6.35 | -1.13  |
| BachoKiro_CC7_335 | -0.15            | -2.01             | NA                | -1.60    | 1.00  | -1.30    | 11.46      | 15.02       | 12.18      | 8.30     | 16.46       | 8.13   | 14.52   | 13.65      | 13.48  | -3.19  | -3.01     | -3.86        | -4.32  | -9.63   | 14.50     | 13.64    | 11.63         | 11.26    | -8.41 | -3.55  |
| UstIshim          | 1.23             | -0.72             | 1.60              | NA       | 2.38  | -0.30    | 12.03      | 14.52       | 12.01      | 8.44     | 17.32       | 7.65   | 14.17   | 14.84      | 14.06  | -2.62  | -2.29     | -2.93        | -3.66  | -9.86   | 14.46     | 14.66    | 12.01         | 11.75    | -8.21 | -2.32  |
| Oase1             | -2.00            | -1.86             | -1.00             | -2.38    | NA    | -2.40    | 11.87      | 14.89       | 12.26      | 9.24     | 15.86       | 8.87   | 14.31   | 14.42      | 13.94  | -4.14  | -3.55     | -5.00        | -5.72  | -9.84   | 14.63     | 13.28    | 11.07         | 10.95    | -8.97 | -3.90  |
| Tianyuan          | 1.68             | -0.97             | 1.30              | 0.30     | 2.40  | NA       | 10.79      | 15.38       | 12.06      | 8.61     | 16.34       | 8.04   | 14.66   | 14.41      | 13.55  | -1.96  | -1.62     | -2.49        | -2.87  | -8.97   | 13.24     | 13.56    | 11.80         | 11.71    | -7.41 | -1.83  |
| Kostenki14        | 12.26            | 9.78              | 11.46             | 12.03    | 11.87 | 10.79    | NA         | -3.47       | -0.10      | 4.06     | -5.57       | 4.23   | -3.14   | -2.65      | -1.41  | 10.15  | 9.58      | 9.92         | 8.90   | 2.83    | -1.49     | -1.74    | 0.23          | 0.99     | 4.66  | 9.88   |
| GoyetQ116-1       | 15.82            | 13.19             | 15.02             | 14.52    | 14.89 | 15.38    | 3.47       | NA          | 3.22       | 7.69     | -1.21       | 7.17   | 0.98    | 1.84       | 2.24   | 13.86  | 13.03     | 14.17        | 12.16  | 5.43    | 2.03      | 2.38     | 4.17          | 4.41     | 8.62  | 14.48  |
| SunghirIII        | 12.37            | 10.04             | 12.18             | 12.01    | 12.26 | 12.06    | 0.10       | -3.22       | NA         | 4.07     | -5.27       | 4.40   | -2.89   | -2.26      | -1.21  | 10.46  | 9.96      | 9.79         | 8.79   | 2.83    | -1.39     | -1.50    | 0.59          | 1.10     | 4.82  | 10.72  |
| Yana_old          | 9.21             | 6.63              | 8.30              | 8.44     | 9.24  | 8.61     | -4.06      | -7.69       | -4.07      | NA       | -9.66       | 0.45   | -7.25   | -7.21      | -5.46  | 6.90   | 6.75      | 6.66         | 5.16   | -1.20   | -5.73     | -5.96    | -3.26         | -3.47    | 0.93  | 7.00   |
| Vestonice16       | 17.39            | 14.52             | 16.46             | 17.32    | 15.86 | 16.34    | 5.57       | 1.21        | 5.27       | 9.66     | NA          | 9.41   | 2.03    | 3.24       | 3.86   | 15.60  | 15.27     | 16.07        | 14.91  | 8.21    | 3.94      | 3.91     | 5.83          | 6.63     | 10.60 | 16.19  |
| Malta1            | 8.32             | 6.40              | 8.13              | 7.65     | 8.87  | 8.04     | -4.23      | -7.17       | -4.40      | 0.45     | -9.41       | NA     | -5.94   | -6.28      | -5.85  | 6.63   | 5.29      | 5.92         | 4.15   | -1.59   | -6.05     | -6.43    | -3.93         | -3.66    | 0.32  | 6.69   |
| ElMiron           | 14.87            | 12.32             | 14.52             | 14.17    | 14.31 | 14.66    | 3.14       | -0.98       | 2.89       | 7.25     | -2.03       | 5.94   | NA      | 1.55       | 2.22   | 14.08  | 12.91     | 13.07        | 11.96  | 6.14    | 1.92      | 2.21     | 3.87          | 4.10     | 8.45  | 13.95  |
| Villabruna        | 15.03            | 12.20             | 13.65             | 14.84    | 14.42 | 14.41    | 2.65       | -1.84       | 2.26       | 7.21     | -3.24       | 6.28   | -1.55   | NA         | 1.04   | 13.31  | 13.01     | 13.07        | 12.41  | 5.36    | 0.81      | 0.91     | 3.41          | 3.55     | 8.27  | 14.23  |
| Bichon            | 13.67            | 11.19             | 13.48             | 14.06    | 13.94 | 13.55    | 1.41       | -2.24       | 1.21       | 5.46     | -3.86       | 5.85   | -2.22   | -1.04      | NA     | 12.70  | 12.66     | 12.27        | 11.27  | 4.48    | -0.20     | -0.25    | 2.10          | 2.80     | 6.90  | 13.14  |
| Clovis            | 3.68             | 1.04              | 3.19              | 2.62     | 4.14  | 1.96     | 10.15      | 13.86       | 10.46      | 6.90     | 15.60       | 6.63   | 14.08   | 13.31      | 12.70  | NA     | -0.07     | -0.40        | -1.53  | -8.13   | 13.03     | 12.93    | 10.30         | 10.21    | -6.29 | 0.30   |
| Satsurbli         | 3.16             | 1.21              | 3.01              | 2.29     | 3.55  | 1.62     | -9.58      | 13.03       | -9.96      | 6.75     | 15.27       | 5.29   | 12.91   | 13.01      | 12.66  | 0.07   | NA        | -0.78        | -2.05  | -8.08   | 12.37     | 12.81    | -9.44         | -9.89    | -6.79 | 0.03   |
| Kolyma_River      | 3.99             | 1.51              | 3.86              | 2.93     | 5.00  | 2.49     | -9.92      | 14.17       | -9.79      | 6.66     | 16.07       | 5.92   | 13.07   | 13.07      | 12.27  | 0.40   | 0.78      | NA           | -1.10  | -7.67   | 12.47     | 13.05    | -9.86         | -9.93    | -5.97 | 0.50   |
| Kotias            | 4.66             | 3.00              | 4.32              | 3.66     | 5.72  | 2.87     | -8.90      | 12.16       | -8.79      | 5.16     | 14.91       | 4.15   | 11.96   | 12.41      | 11.27  | 1.53   | 2.05      | 1.10         | NA     | -6.85   | 11.36     | 11.73    | -9.02         | -8.78    | -4.76 | 1.54   |
| Karelia           | 10.18            | 7.84              | 9.63              | 9.86     | 9.84  | 8.97     | -2.83      | -5.43       | -2.83      | 1.20     | -8.21       | 1.59   | -6.14   | -5.36      | -4.48  | 8.13   | 8.08      | 7.67         | 6.85   | NA      | -4.89     | -5.15    | -3.02         | -2.13    | 2.17  | 8.29   |
| Loschbour         | 14.08            | 11.42             | 14.50             | 14.46    | 14.63 | 13.24    | 1.49       | -2.03       | 1.39       | 5.73     | -3.94       | 6.05   | -1.92   | -0.81      | 0.20   | 13.03  | 12.37     | 12.47        | 11.36  | 4.89    | NA        | -0.20    | 2.32          | 3.07     | 7.49  | 12.87  |
| LaBranal          | 14.75            | 11.08             | 13.64             | 14.66    | 13.28 | 13.56    | 1.74       | -2.38       | 1.50       | 5.96     | -3.91       | 6.43   | -2.21   | -0.91      | 0.25   | 12.93  | 12.81     | 13.05        | 11.73  | 5.15    | 0.20      | NA       | 2.59          | 3.06     | 7.54  | 13.26  |
| Hungarian.KO1     | 12.29            | 9.41              | 11.63             | 12.01    | 11.07 | 11.80    | -0.23      | -4.17       | -0.59      | 3.26     | -5.83       | 3.93   | -3.87   | -3.41      | -2.10  | 10.30  | 9.44      | 9.86         | 9.02   | 3.02    | -2.32     | -2.59    | NA            | 0.75     | 4.82  | 10.58  |
| Motala12          | 12.05            | 8.87              | 11.26             | 11.75    | 10.95 | 11.71    | -0.99      | -4.41       | -1.10      | 3.47     | -6.63       | 3.66   | -4.10   | -3.55      | -2.80  | 10.21  | 9.89      | 9.93         | 8.78   | 2.13    | -3.07     | -3.06    | -0.75         | NA       | 4.66  | 10.35  |
| LBK               | 8.89             | 6.35              | 8.41              | 8.21     | 8.97  | 7.41     | -4.66      | -8.62       | -4.82      | 0.93     | 10.60       | 0.32   | -8.45   | -8.27      | -6.90  | 6.29   | 6.79      | 5.97         | 4.76   | -2.17   | -7.49     | -7.54    | -4.82         | -4.66    | NA    | 5.95   |
| Saqqaq            | 3.37             | 1.13              | 3.55              | 2.32     | 3.90  | 1.83     | -9.88      | 14.48       | 10.72      | 7.00     | 16.19       | 6.69   | 13.95   | 14.23      | 13.14  | -0.30  | -0.03     | -0.50        | -1.54  | -8.29   | 12.87     | 13.26    | 10.58         | 10.35    | -5.95 | NA     |

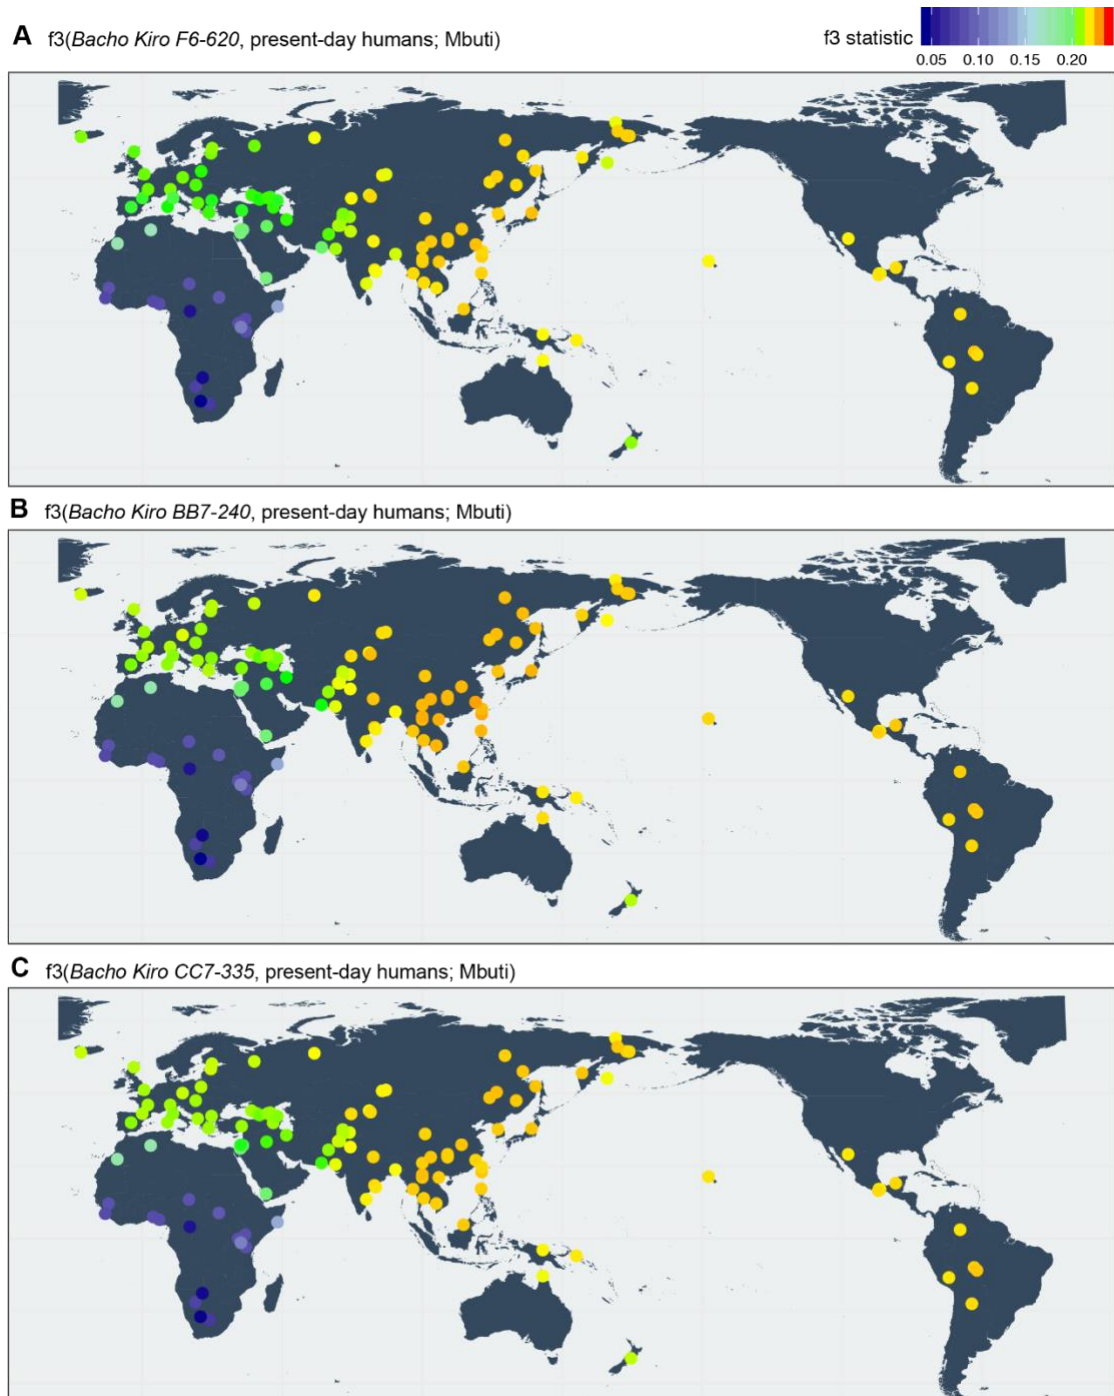

1065  
 1066 **Figure S5.1 Heatmap of the shared genetic drift between the IUP Bacho Kiro Cave**  
 1067 **individuals and present-day human populations calculated as  $f_3(\text{IUP Bacho Kiro}$**   
 1068 ***individual, present-day humans; Mbuti*). A) Bacho Kiro F6-620, B) Bacho Kiro BB7-240, C)**  
 1069 ***Bacho Kiro CC7-335*. Present-day modern human genomes from SGDP<sup>10</sup> were used for**  
 1070 **calculating these statistics. Plotted  $f_3$  values were calculated using ADMIXTOOLS<sup>3</sup> as**  
 1071 **implemented in *admixr*<sup>9</sup>, and which are reported in detail in Tables S5.2-S5.4 along with the**  
 1072 **number of SNPs used for these calculations. A higher  $f_3$ -value is indicated with warmer colour**  
 1073 **and corresponds to the higher shared genetic drift between an IUP Bacho Kiro Cave individual**

1074 and a given present-day human population. Standard errors (SE) were computed using a  
1075 Weighted Block Jackknife<sup>3,12</sup> across all autosomes of the “2200k” Panel and using a block size  
1076 of 5Mb. Three Mbuti individuals from SGDP<sup>10</sup> were used as outgroup. Coordinates for present-  
1077 day humans were obtained from *Mallick et al.*<sup>10</sup>. The heatmap scale is kept consistent with the  
1078 Fig. 2A, Extended Data Fig. 3B and C, and Fig. S5.2.

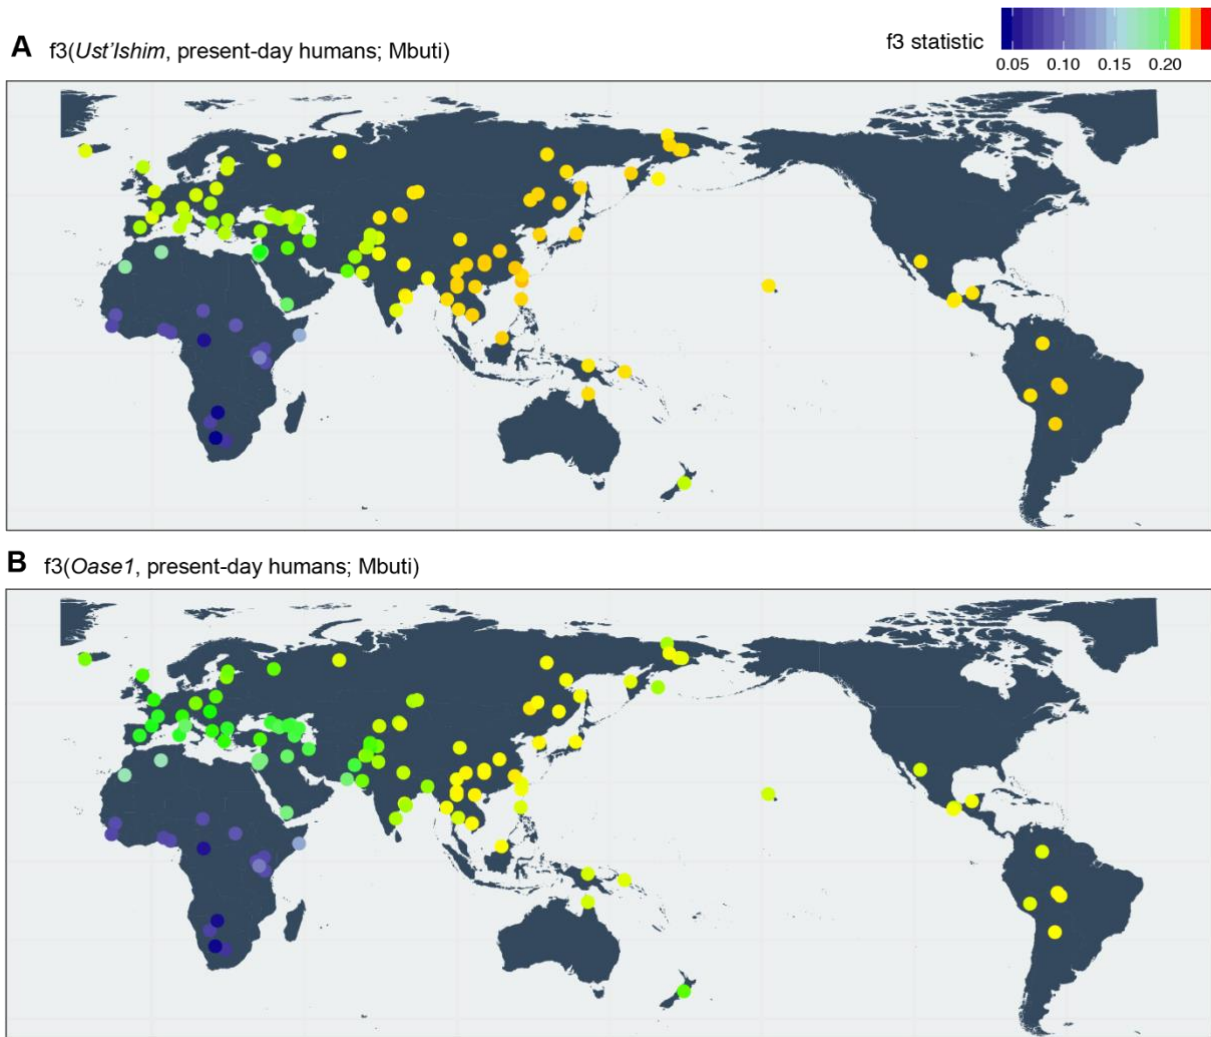

1079

1080 **Figure S5.2 Heatmap of the shared genetic drift between the *Ust'Ishim* or *Oase1* and**  
 1081 **present-day human populations calculated as  $f_3(\text{Ust'Ishim/Oase1}, \text{present-day humans};$**   
 1082 ***Mbuti*).** Present-day modern human genomes from SGDP<sup>10</sup> were used for calculating these  
 1083 statistics. Plotted  $f_3$  values were calculated using ADMIXTOOLS<sup>3</sup> as implemented in *admixr*<sup>9</sup>.  
 1084 A higher  $f_3$ -value is indicated with warmer colour and corresponds to higher shared genetic  
 1085 drift between **A**) *Ust'Ishim* or **B**) *Oase1* and a given present-day human population. Standard  
 1086 errors (SE) were computed using a Weighted Block Jackknife<sup>3,12</sup> across all autosomes of the  
 1087 “2200k” Panel (nsnps (*Ust'Ishim*) = 1,951,462; nsnps (*Oase 1*) = 402,526), and using a block  
 1088 size of 5Mb. Three Mbuti individuals from SGDP<sup>10</sup> were used as outgroup. Coordinates for  
 1089 present-day humans were obtained from *Mallick et al.*<sup>10</sup>. The heatmap scale is kept consistent  
 1090 with the Fig. 2A, Extended Data Fig. 3B and C, and Fig. S5.1.



D(W, X; BachoKiro F6-620, Chimp)

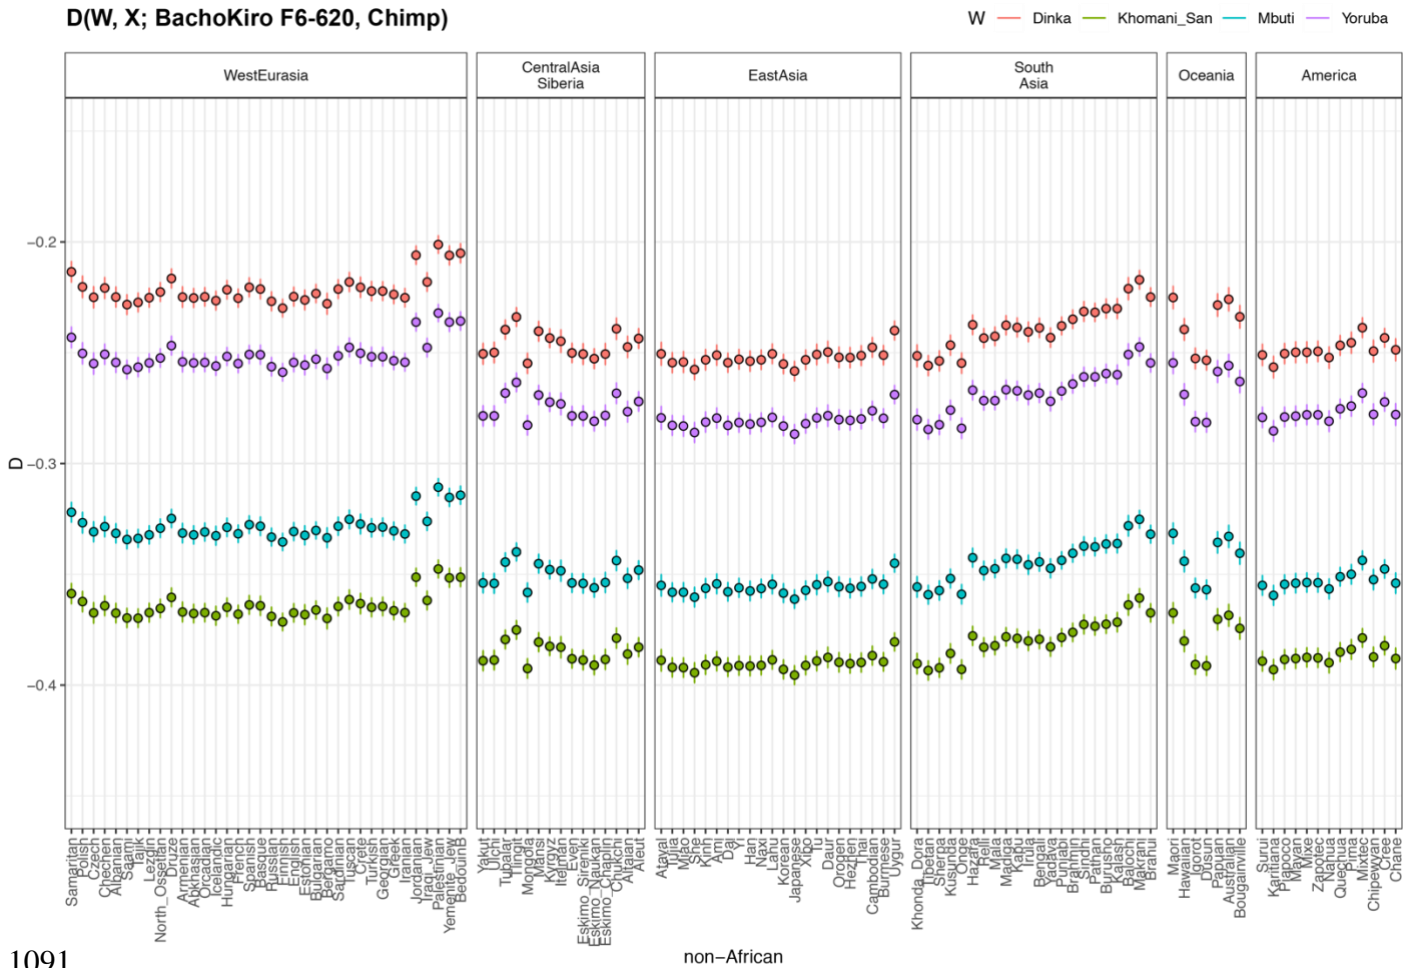

1091

1092 **Figure S5.3 D-statistics of the form  $D(W, X; \text{Bacho Kiro F6-620, Chimpanzee})$  where  $W$  is**

1093 **a present-day African population and  $X$  is a present-day non-African population from**

1094 **SGDP<sup>10</sup>. *Bacho Kiro F6-620* is significantly closer to present-day non-Africans than present-**

1095 **day Africans.  $D$  values plotted on the y-axis were calculated using ADMIXTOOLS<sup>3</sup> as**

1096 **implemented in *admixr*<sup>9</sup>. Filled-in circles indicate a significant Z-score or  $|Z| \geq 3$ , and open**

1097 **circles indicate a non-significant Z-score or  $|Z| < 3$ . Whiskers on each side of the plotted  $D$**

1098 **values correspond to one standard error calculated using a Weighted Block Jackknife<sup>3,12</sup> across**

1099 **all autosomes on the “2200k” Panel (nsnps (*Bacho Kiro F6-620*) = 1,779,883) and a block size**

1100 **of 5 Mb.**

D(W, X; BachoKiro BB7-240, Chimp)

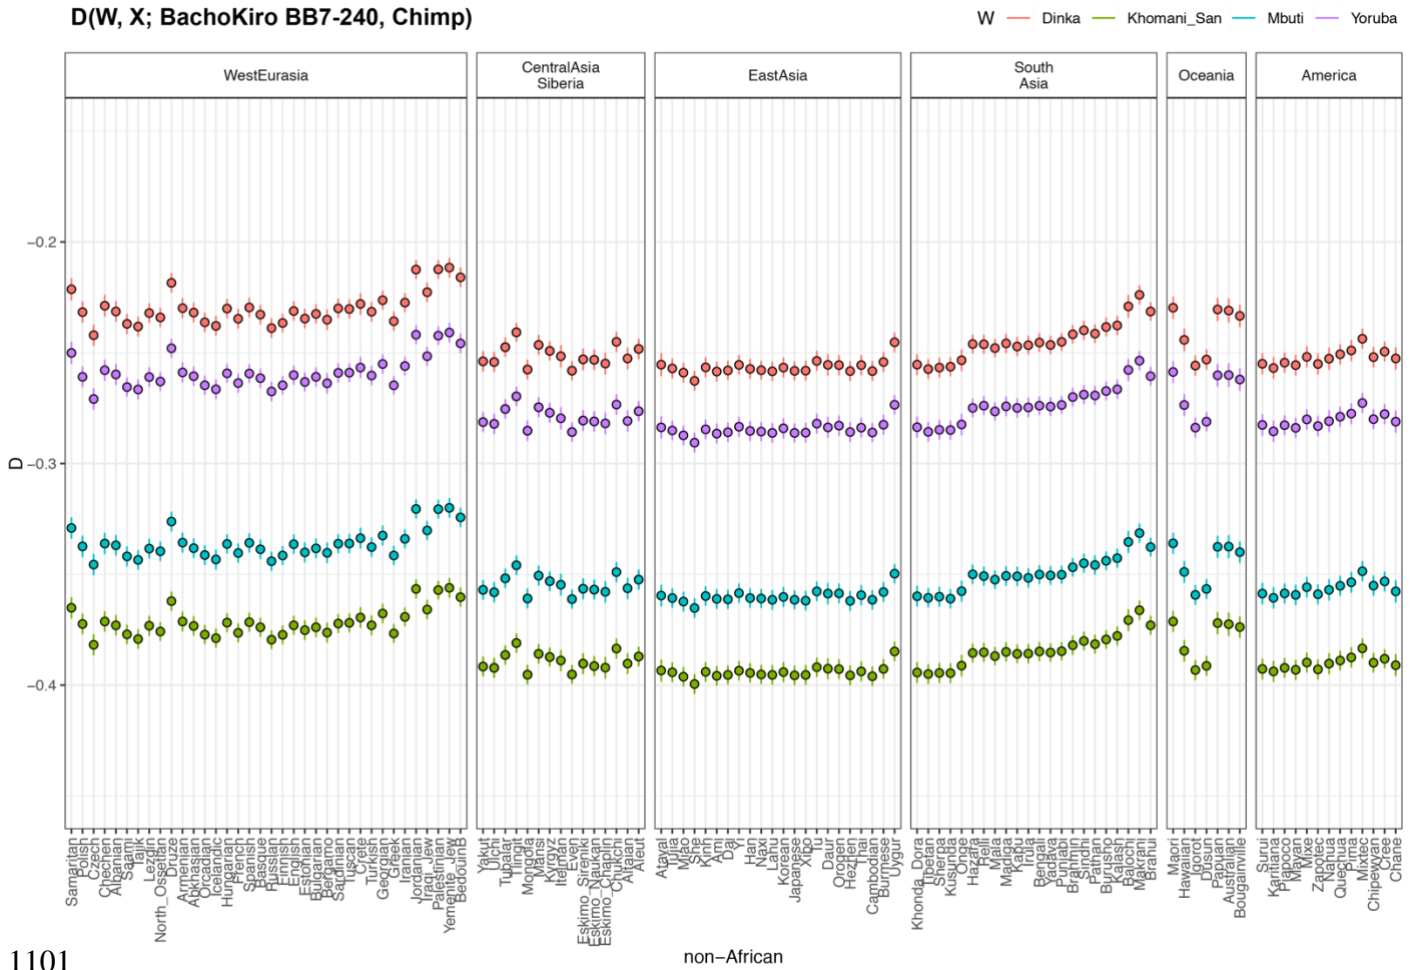

1101  
 1102 **Figure S5.4 D-statistics of the form  $D(W, X; \text{Bacho Kiro BB7-240, Chimpanzee})$  where  $W$**   
 1103 **is a present-day African population and  $X$  is a present-day non-African population from**  
 1104 **SGDP<sup>10</sup>. *Bacho Kiro BB7-240* is significantly closer to present-day non-Africans than present-**  
 1105 **day Africans.  $D$  values plotted on the y-axis were calculated using ADMIXTOOLS<sup>3</sup> as**  
 1106 **implemented in *admixr*<sup>9</sup>. Filled-in circles indicate a significant Z-score or  $|Z| \geq 3$ , and open**  
 1107 **circles indicate a non-significant Z-score or  $|Z| < 3$ . Whiskers on each side of the plotted  $D$**   
 1108 **values correspond to one standard error calculated using a Weighted Block Jackknife<sup>3,12</sup> across**  
 1109 **all autosomes on the “2200k” Panel ( $n_{\text{snps}}(\text{Bacho Kiro BB7-240}) = 787,706$ ) and a block size**  
 1110 **of 5 Mb.**

D(W, X; BachoKiro CC7-335, Chimp)

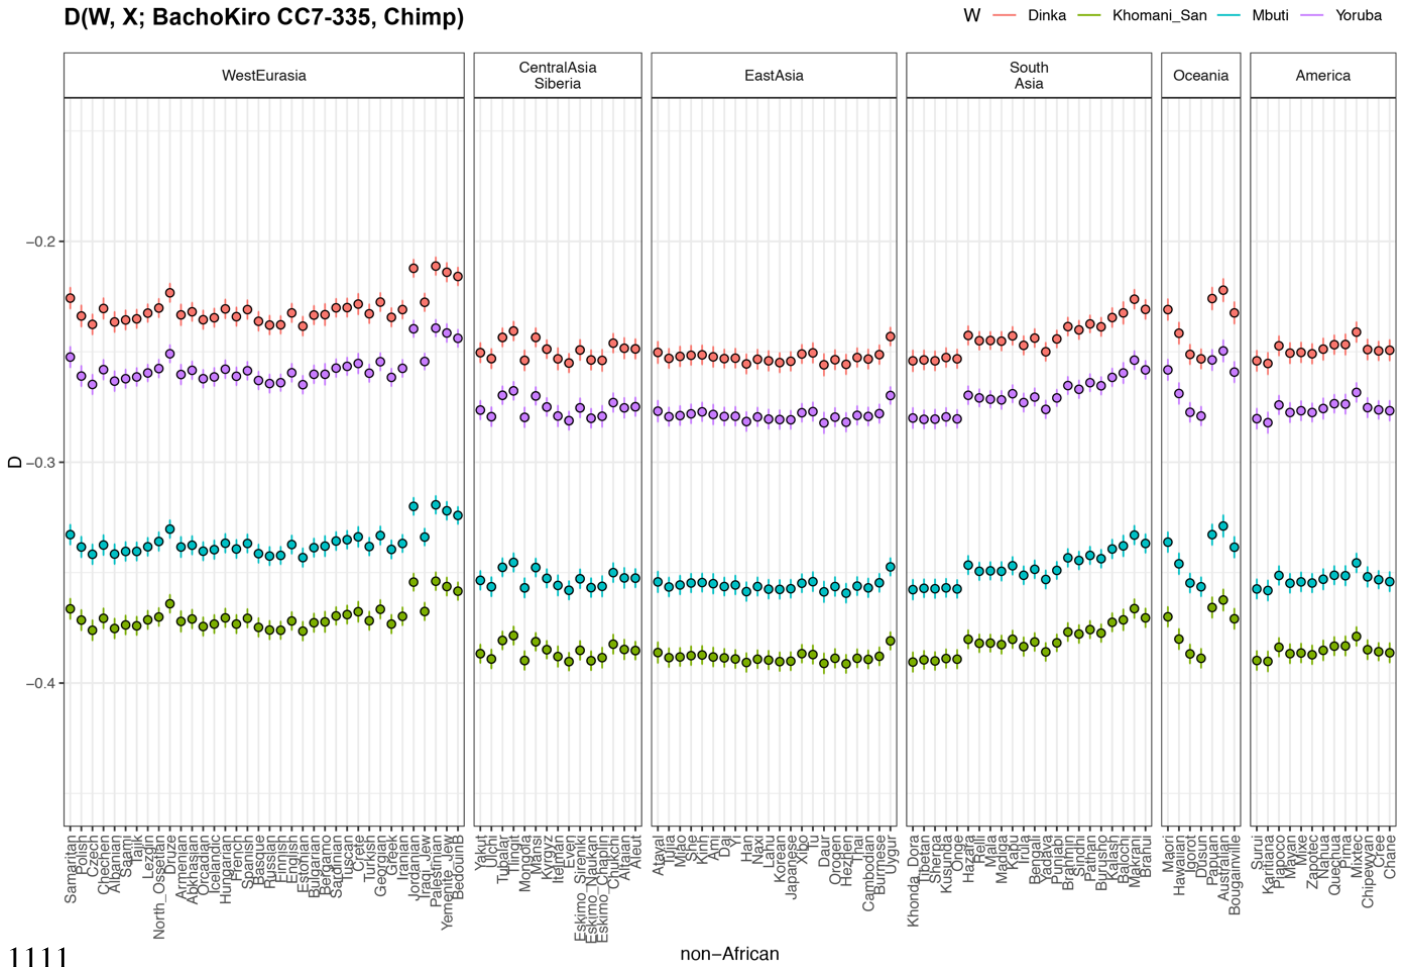

1111  
 1112 **Figure S5.5 D-statistics of the form  $D(W, X; \text{Bacho Kiro CC7-335, Chimpanzee})$  where  $W$**   
 1113 **is a present-day African population and  $X$  is a present-day non-African population from**  
 1114 **SGDP<sup>10</sup>. Bacho Kiro CC7-335 is significantly closer to present-day non-Africans than present-**  
 1115 **day Africans.  $D$  values denoted as circles and plotted on the y-axis were calculated using**  
 1116 **ADMIXTOOLS<sup>3</sup> as implemented in *admixr*<sup>9</sup>. Filled-in circles indicate a significant Z-score or**  
 1117  **$|Z| \geq 3$ , and open circles indicate a non-significant Z-score or  $|Z| < 3$ . Whiskers on each side of**  
 1118 **the plotted  $D$  values correspond to one standard error calculated using a Weighted Block**  
 1119 **Jackknife<sup>3,12</sup> across all autosomes on the “2200k” Panel (nsnps (*Bacho Kiro CC7-335*) =**  
 1120 **723,129) and a block size of 5 Mb.**

D(W, X; BachoKiro BK1653, Chimp)

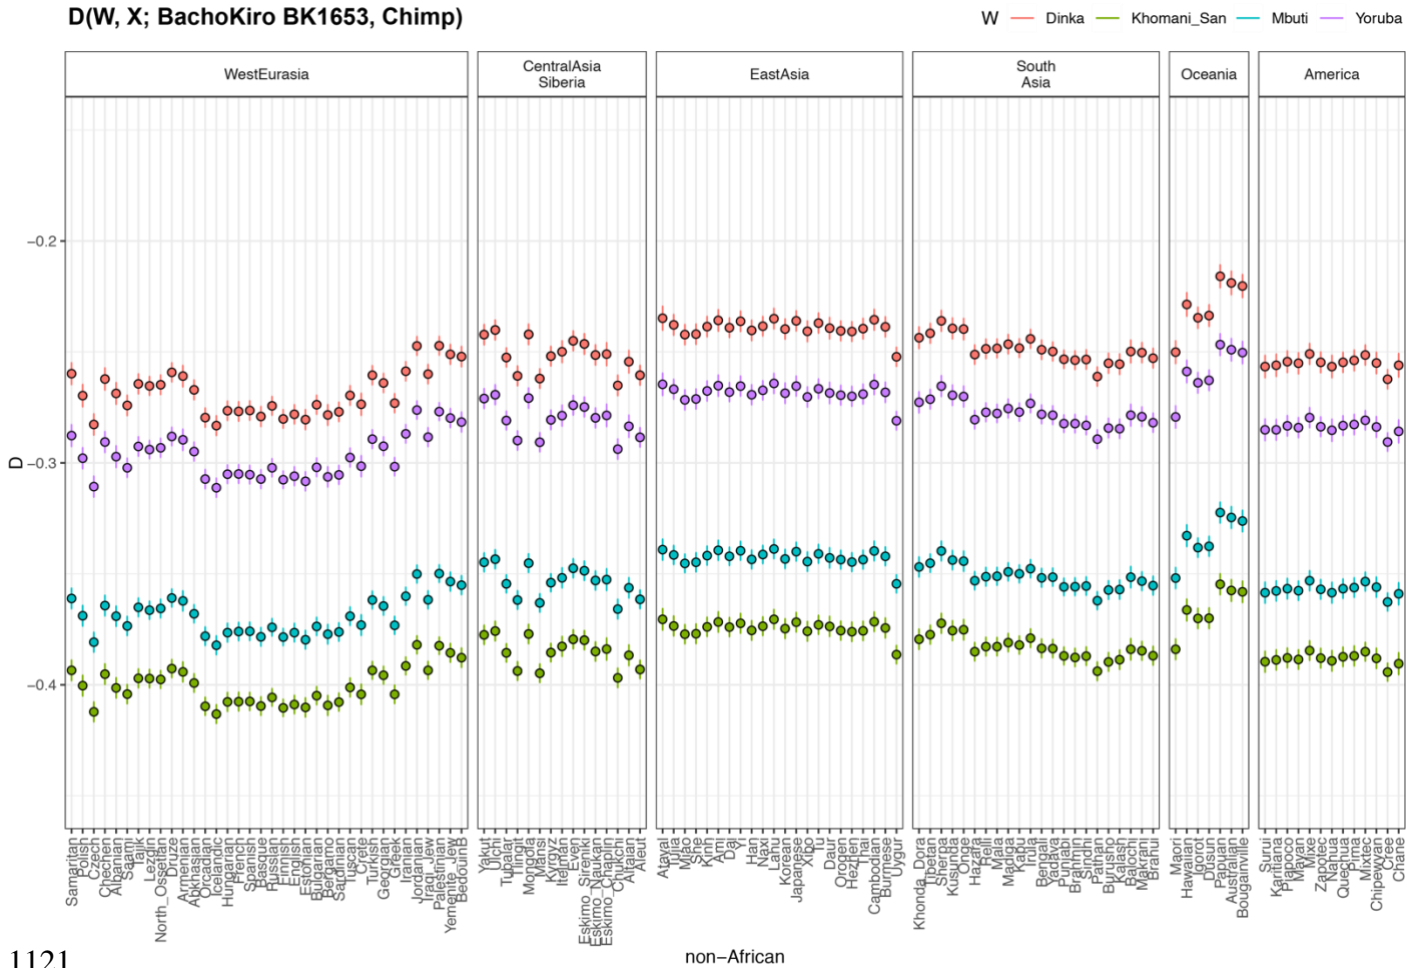

1121

1122 **Figure S5.6 D-statistics of the form  $D(W, X; \text{Bacho Kiro BK1653, Chimpanzee})$  where  $W$  is**

1123 **a present-day African population and  $X$  is a present-day non-African population from**

1124 **SGDP<sup>10</sup>. *Bacho Kiro BK1653* is significantly closer to present-day non-Africans than present-**

1125 **day Africans.  $D$  values denoted as circles and plotted on the y-axis were calculated using**

1126 **ADMIXTOOLS<sup>3</sup> as implemented in *admixr*<sup>9</sup>. Filled-in circles indicate a significant Z-score or**

1127  **$|Z| \geq 3$ , and open circles indicate a non-significant Z-score or  $|Z| < 3$ . Whiskers on each side of**

1128 **the plotted  $D$  values correspond to one standard error calculated using a Weighted Block**

1129 **Jackknife<sup>3,12</sup> across all autosomes on the “2200k” Panel (nsnps (*Bacho Kiro BK1653*) =**

1130 **825,379) and a block size of 5 Mb.**

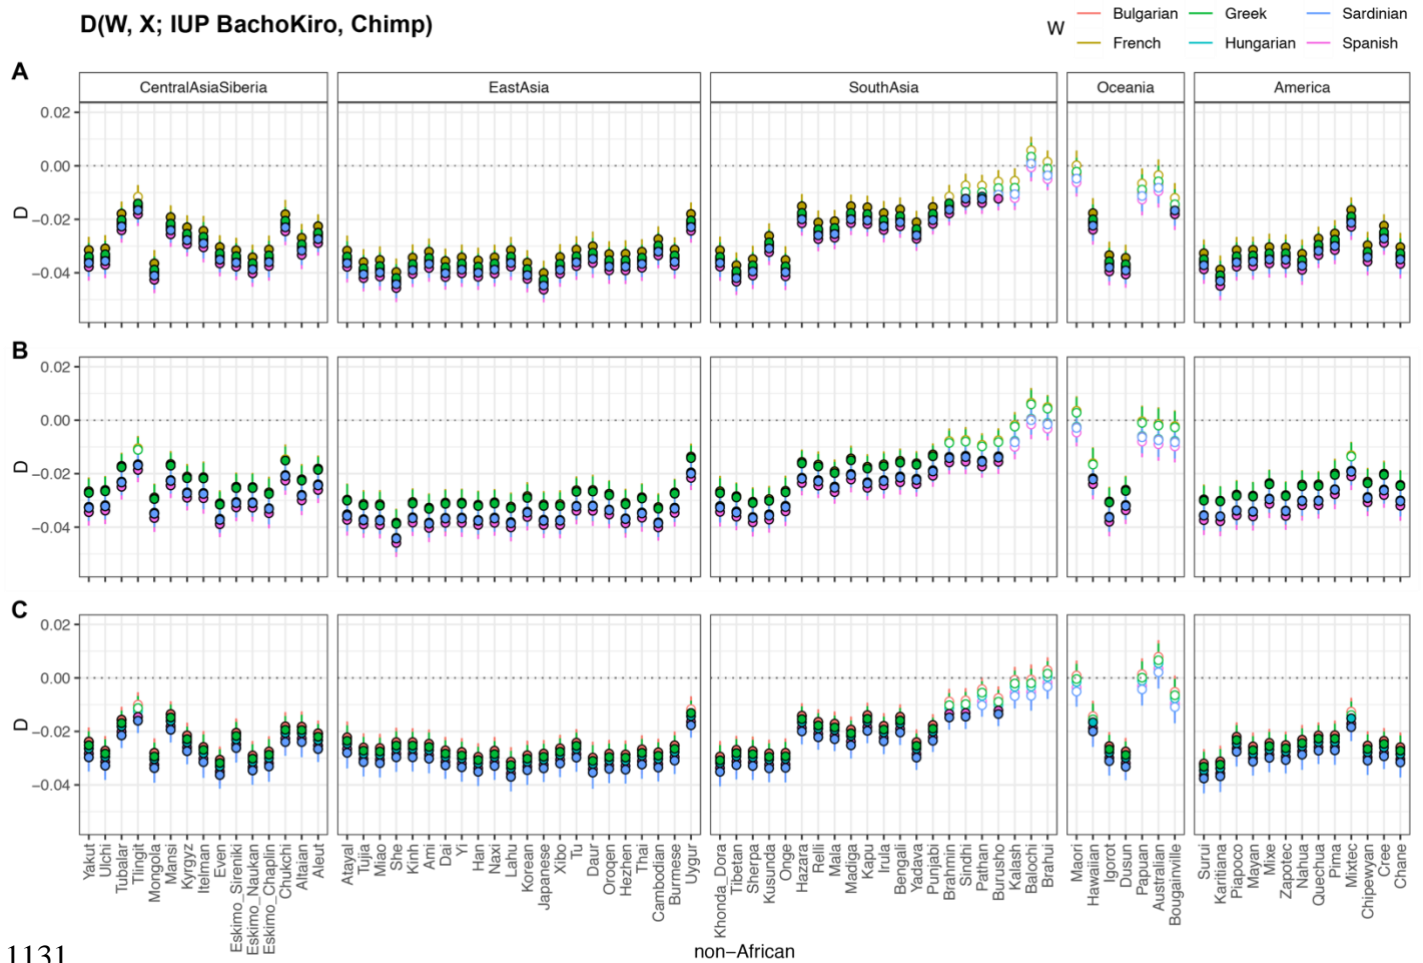

1131  
 1132 **Figure S5.7 D-statistics of the form  $D(W, X; IUP\ Bacho\ Kiro\ individual, Chimpanzee)$**   
 1133 **where  $W$  is one of the six present-day West Eurasian populations and  $X$  is a present-day**  
 1134 **non-African population from Central Asia and Siberia, East Asia, South Asia, Oceania or**  
 1135 **Americas. A) *Bacho Kiro F6-620* (nsnps = 1,779,883), B) *Bacho Kiro BB7-240* (nsnps =**  
 1136 **787,706) and C) *Bacho Kiro CC7-335* (nsnps = 723,129).  $D$  values denoted as circles and**  
 1137 **plotted on the  $y$ -axes were calculated using ADMIXTOOLS<sup>3</sup> as implemented in *admixr*<sup>9</sup>.**  
 1138 **Present-day human genomes from SGDP<sup>10</sup> were used in these statistics, and a genome of**  
 1139 ***panTro2* as an outgroup. Filled-in circles indicate a significant Z-score or  $|Z| \geq 3$ , and open**  
 1140 **circles indicate a non-significant Z-score or  $|Z| < 3$ . Whiskers on each side of the plotted  $D$**   
 1141 **values correspond to one standard error calculated using a Weighted Block Jackknife<sup>3,12</sup> across**  
 1142 **all autosomes on the “2200k” Panel and a block size of 5 Mb.**

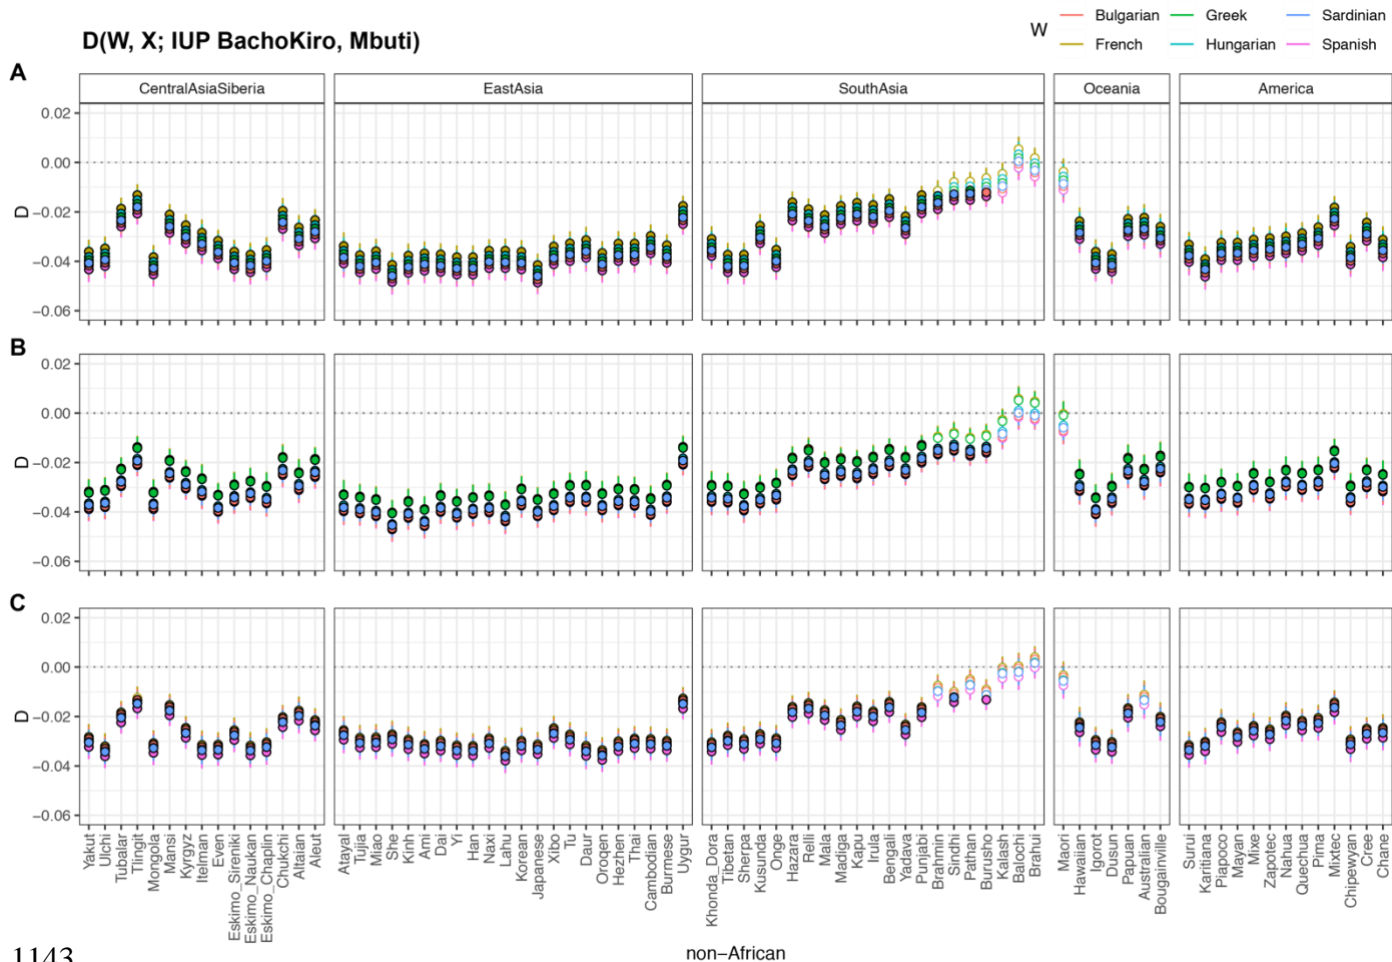

1143  
 1144 **Figure S5.8 D-statistics of the form  $D(W, X; \text{Bacho Kiro BK1653}, \text{Mbuti})$  where  $W$  is one**  
 1145 **of the six present-day West Eurasian populations and  $X$  is a present-day non-African**  
 1146 **population from Central Asia and Siberia, East Asia, South Asia, Oceania or Americas.**  
 1147 **A) Bacho Kiro F6-620 (nsnps = 1,779,883), B) Bacho Kiro BB7-240 (nsnps = 787,706) and**  
 1148 **C) Bacho Kiro CC7-335 (nsnps = 723,129).  $D$  values denoted as circles and plotted on the y-**  
 1149 **axes were calculated using ADMIXTOOLS<sup>3</sup> as implemented in *admixr*<sup>9</sup>. Present-day human**  
 1150 **genomes from SGDP<sup>10</sup> were used in these statistics, and three Mbuti individuals from the same**  
 1151 **panel were used as outgroup. Filled-in circles indicate a significant Z-score or  $|Z| \geq 3$ , and open**  
 1152 **circles indicate a non-significant Z-score or  $|Z| < 3$ . Whiskers on each side of the plotted  $D$**   
 1153 **values correspond to one standard error calculated using a Weighted Block Jackknife<sup>3,12</sup> across**  
 1154 **all autosomes on the “2200k” Panel and a block size of 5 Mb.**

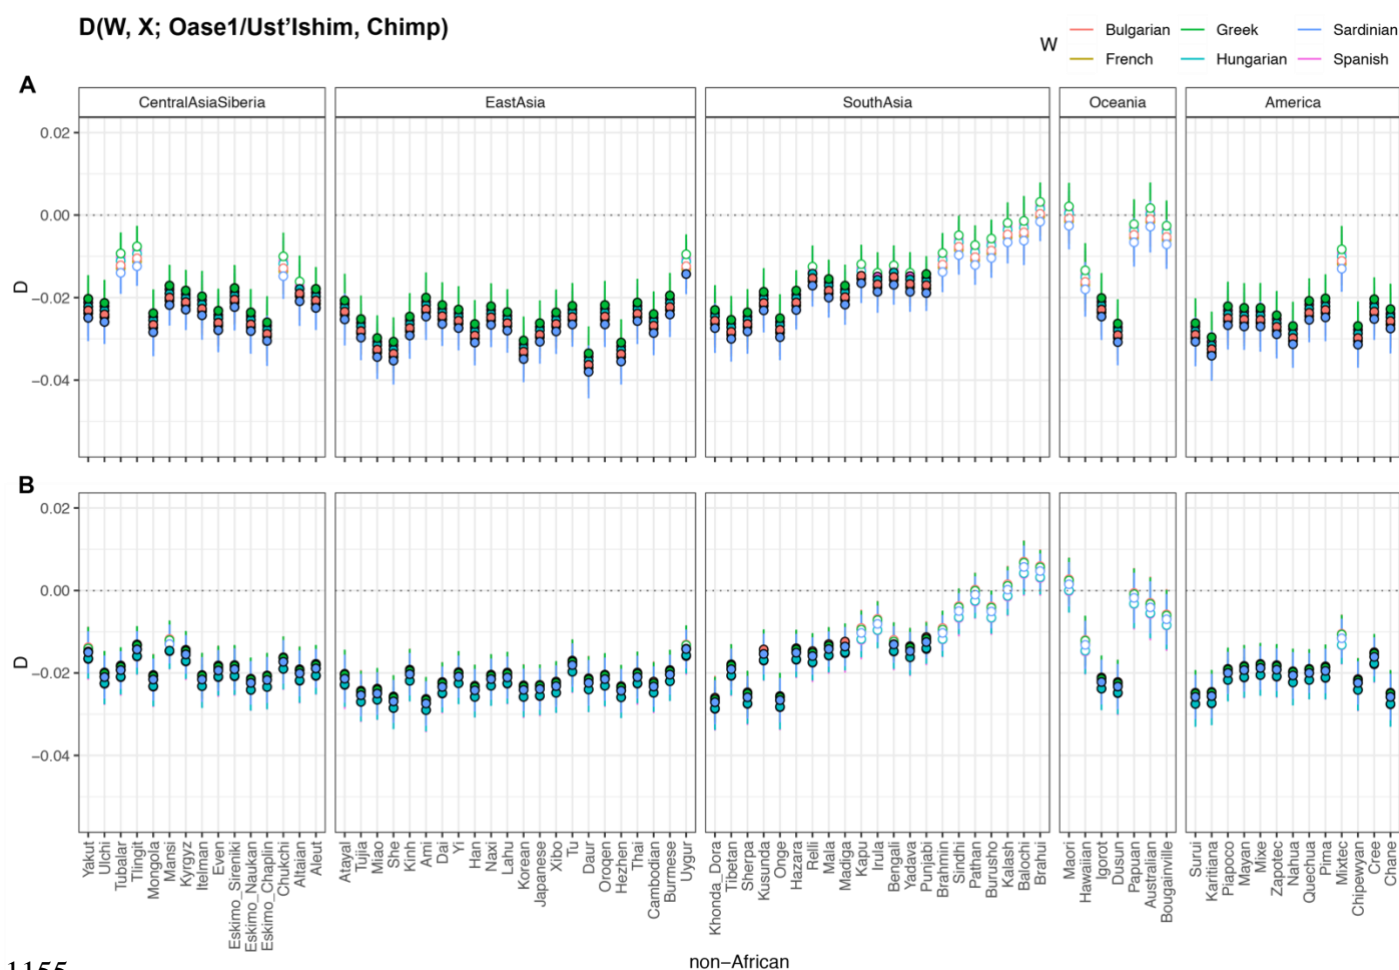

1155  
 1156 **Figure S5.9 D-statistics of the form  $D(W, X; Ust'Ishim/Oase1, Chimpanzee)$  where  $W$  is one**  
 1157 **of the six present-day West Eurasian populations and  $X$  is a present-day non-African**  
 1158 **population from Central Asia and Siberia, East Asia, South Asia, Oceania or Americas.**  
 1159 **A) *Oase1* (nsnps = 402,526) and B) *Ust'Ishim* (nsnps = 1,951,462).**  $D$  values denoted as circles  
 1160 and plotted on the y-axes were calculated using ADMIXTOOLS<sup>3</sup> as implemented in *admixr*<sup>9</sup>.  
 1161 Present-day human genomes from SGDP<sup>10</sup> were used in these statistics, and a genome of  
 1162 *panTro2* as an outgroup. Filled-in circles indicate a significant Z-score or  $|Z| \geq 3$ , and open  
 1163 circles indicate a non-significant Z-score or  $|Z| < 3$ . Whiskers on each side of the plotted  $D$   
 1164 values correspond to one standard error calculated using a Weighted Block Jackknife<sup>3,12</sup> across  
 1165 all autosomes on the “2200k” Panel and a block size of 5 Mb.

$D(W, X; Oase1/Ust'Ishim, Mbuti)$

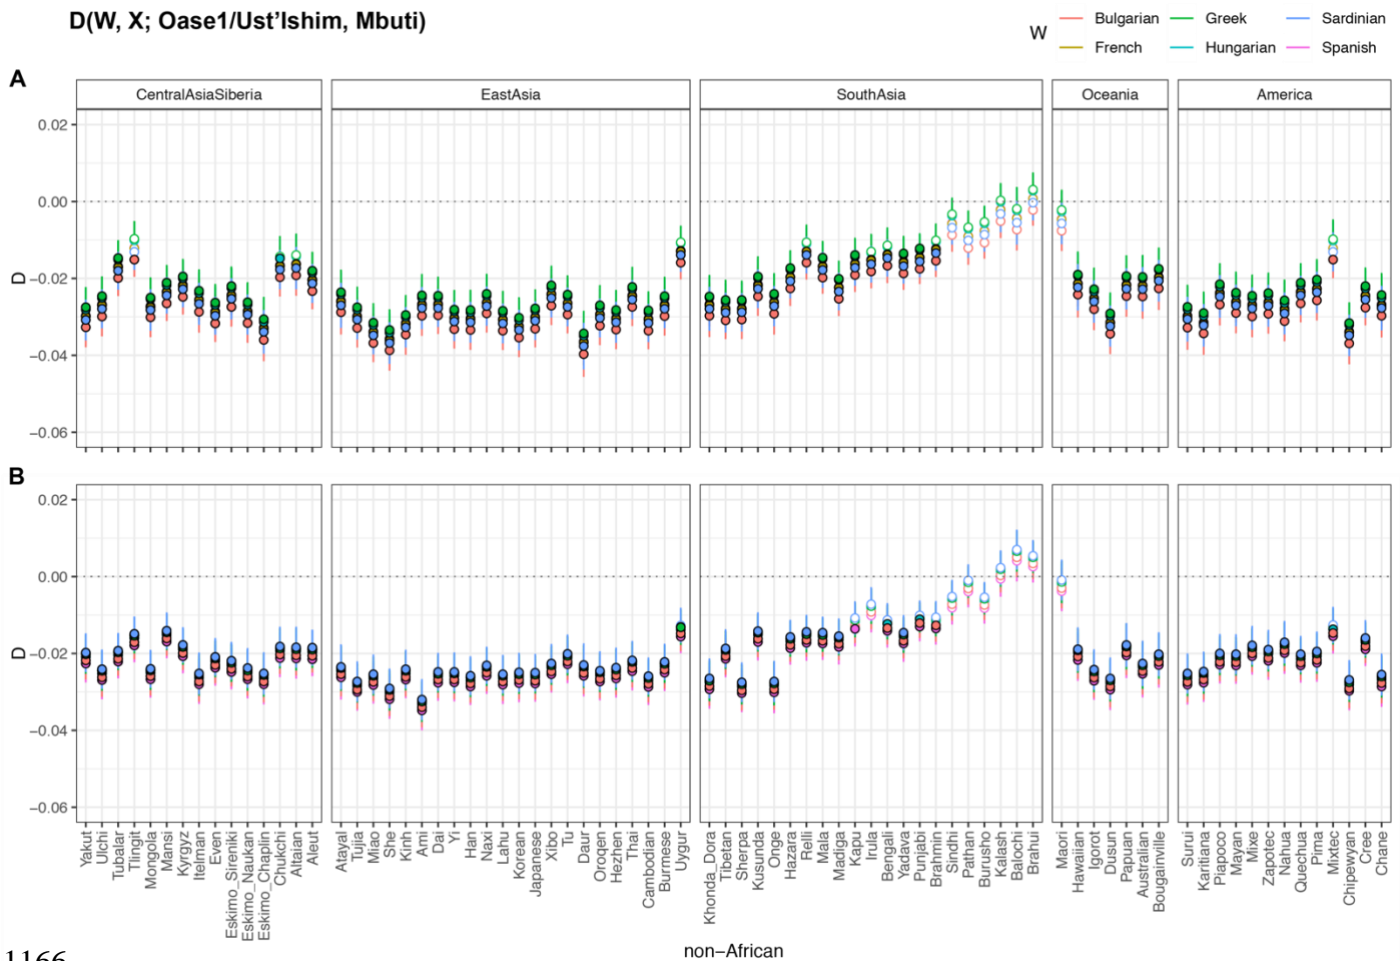

1166

1167 **Figure S5.10 D-statistics of the form  $D(W, X; Ust'Ishim/Oase1, Mbuti)$  where  $W$  is one of**  
 1168 **the six present-day West Eurasian populations and  $X$  is a present-day non-African**  
 1169 **population from Central Asia and Siberia, East Asia, South Asia, Oceania or Americas.**

1170 **A) *Oase1* (nsnps = 402,526) and B) *Ust'Ishim* (nsnps = 1,951,462).**  $D$  values denoted as circles  
 1171 and plotted on the y-axes were calculated using ADMIXTOOLS<sup>3</sup> as implemented in *admixr*<sup>9</sup>.  
 1172 Present-day human genomes from SGDP<sup>10</sup> were used in these statistics, and three Mbuti  
 1173 individuals from the same panel were used as outgroup. Filled-in circles indicate a significant  
 1174 Z-score or  $|Z| \geq 3$ , and open circles indicate a non-significant Z-score or  $|Z| < 3$ . Whiskers on  
 1175 each side of the plotted  $D$  values correspond to one standard error calculated using a Weighted  
 1176 Block Jackknife<sup>3,12</sup> across all autosomes on the “2200k” Panel and a block size of 5 Mb.



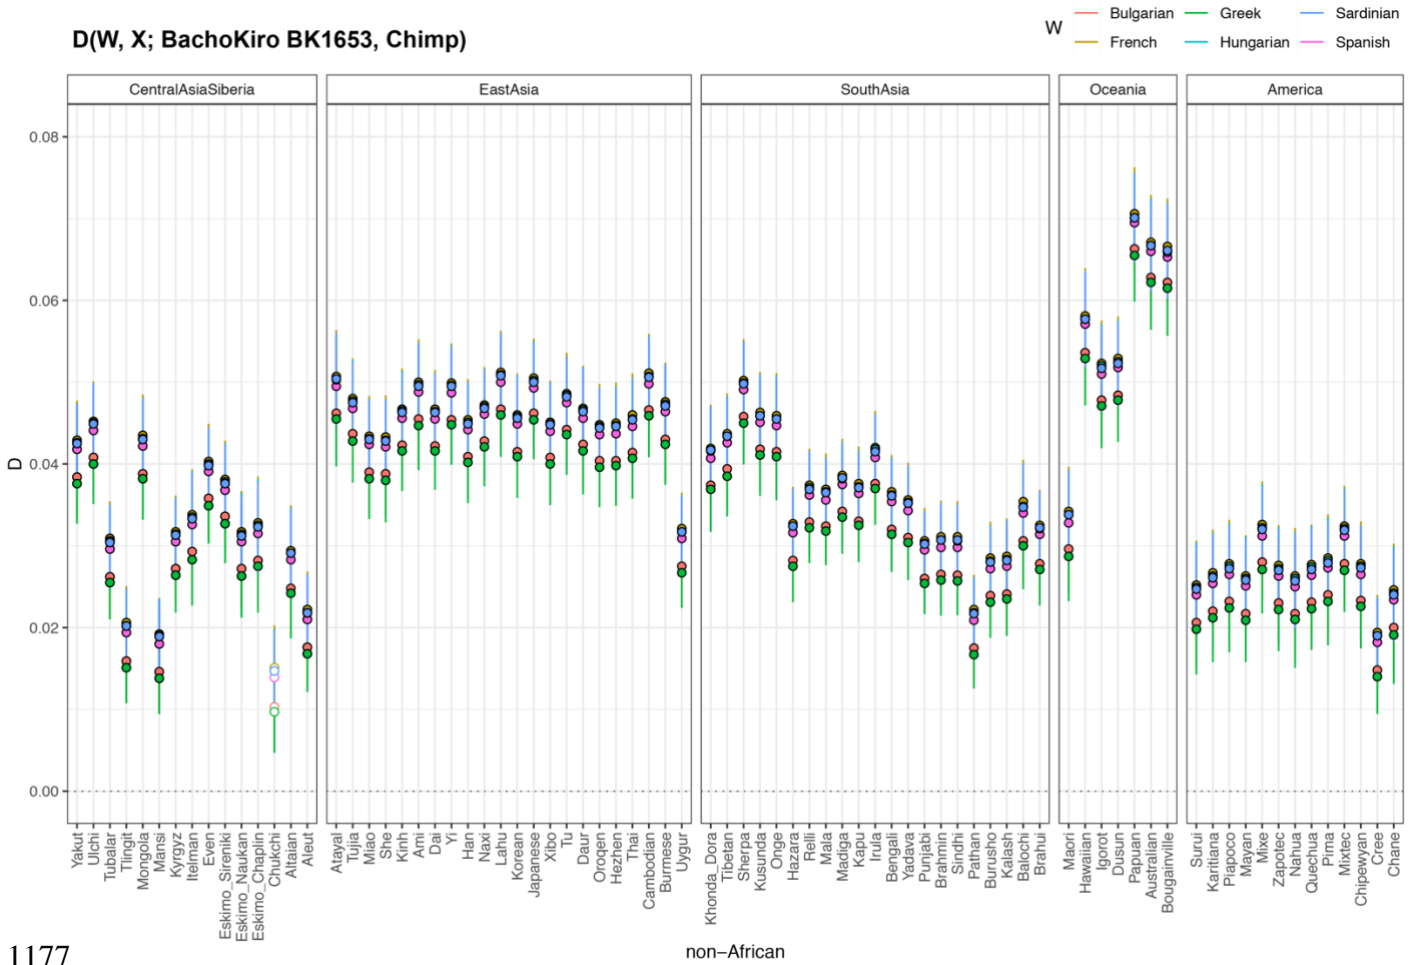

1177  
 1178 **Figure S5.11 D-statistics of the form  $D(W, X; \text{Bacho Kiro BK1653, Chimpanzee})$  where  $W$**   
 1179 **is one of the six present-day West Eurasian populations and  $X$  is a present-day non-**  
 1180 **African population from Central Asia and Siberia, East Asia, South Asia, Oceania or**  
 1181 **Americas.  $D$  values denoted as circles and plotted on the y-axis were calculated using**  
 1182 **ADMIXTOOLS<sup>3</sup> as implemented in *admixr*<sup>9</sup>. Present-day human genomes from SGDP<sup>10</sup> were**  
 1183 **used in these statistics, and a genome of *panTro2* as an outgroup. *Bacho Kiro BK1653* (nsnps**  
 1184 **= 825,379) is significantly closer to present-day West Eurasians than to any other**  
 1185 **superpopulation from SGDP. Filled-in circles indicate a significant Z-score or  $|Z| \geq 3$ , and open**  
 1186 **circles indicate a non-significant Z-score or  $|Z| < 3$ . Whiskers on each side of the plotted  $D$**   
 1187 **values correspond to one standard error calculated using a Weighted Block Jackknife<sup>3,12</sup> across**  
 1188 **all autosomes on the “2200k” Panel and a block size of 5 Mb.**

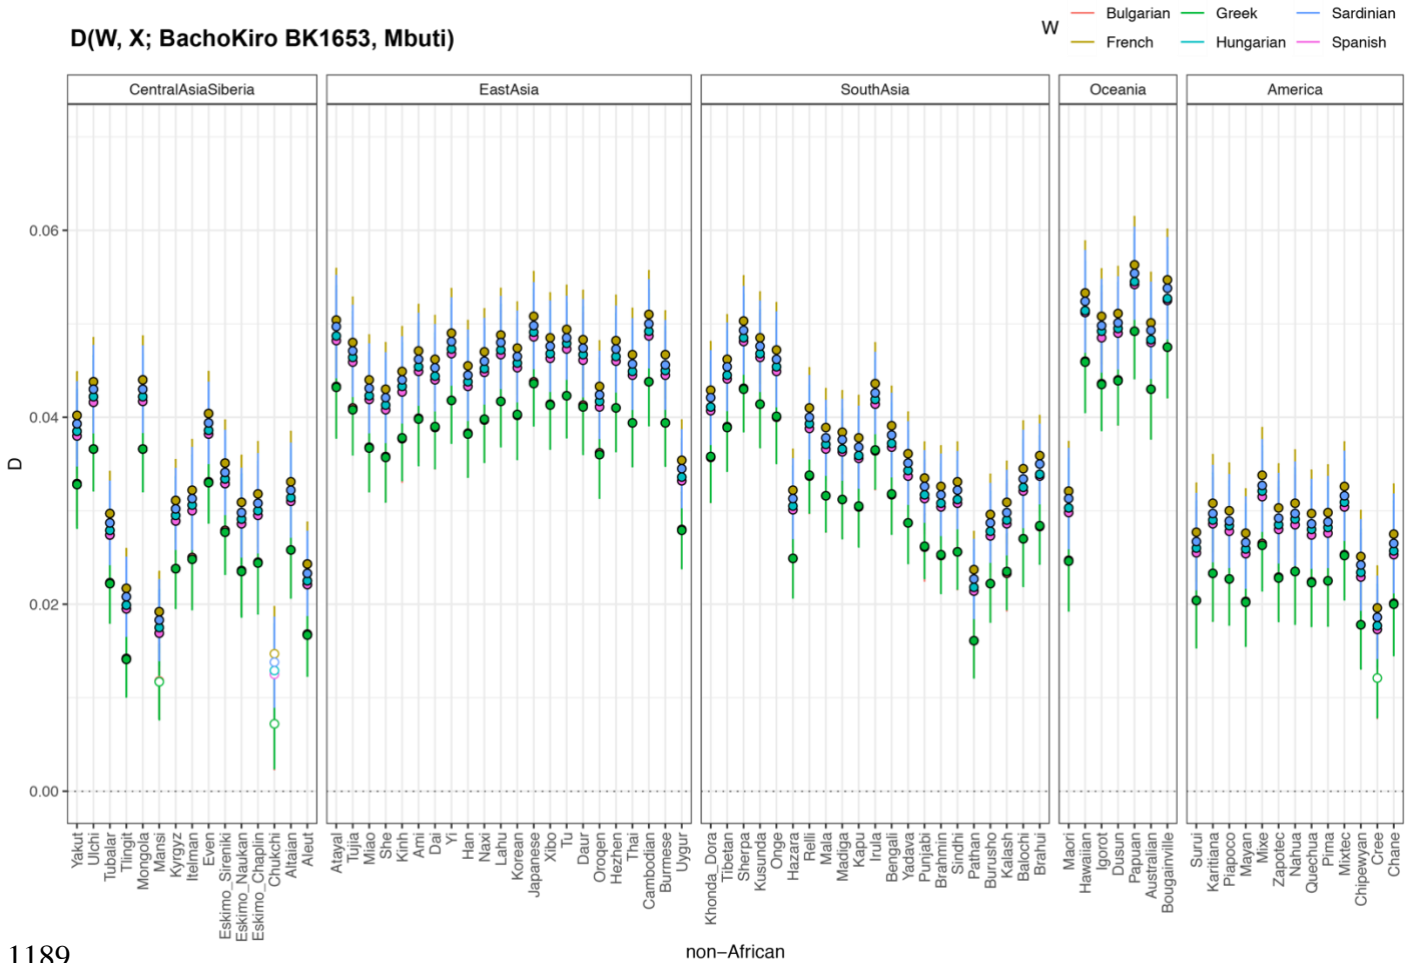

1189  
 1190 **Figure S5.12 D-statistics of the form  $D(W, X; \text{Bacho Kiro BK1653, Mbuti})$  where  $W$  is one**  
 1191 **of the six present-day West Eurasian populations and  $X$  is a present-day non-African**  
 1192 **population from Central Asia and Siberia, East Asia, South Asia, Oceania or Americas.**  
 1193  $D$  values denoted as circles and plotted on the y-axis were calculated using ADMIXTOOLS<sup>3</sup>  
 1194 as implemented in *admixr*<sup>9</sup>. Present-day human genomes from SGDP<sup>10</sup> were used in these  
 1195 statistics, and three Mbuti individuals from the same panel were used as outgroup. *Bacho Kiro*  
 1196 *BK1653* (nsnps = 825,379) is significantly closer to present-day West Eurasians than to any  
 1197 other superpopulation from SGDP. Filled-in circles indicate a significant Z-score or  $|Z| \geq 3$ , and  
 1198 open circles indicate a non-significant Z-score or  $|Z| < 3$ . Whiskers on each side of the plotted  
 1199  $D$  values correspond to one standard error calculated using a Weighted Block Jackknife<sup>3,12</sup>  
 1200 across all autosomes on the “2200k” Panel and a block size of 5 Mb.

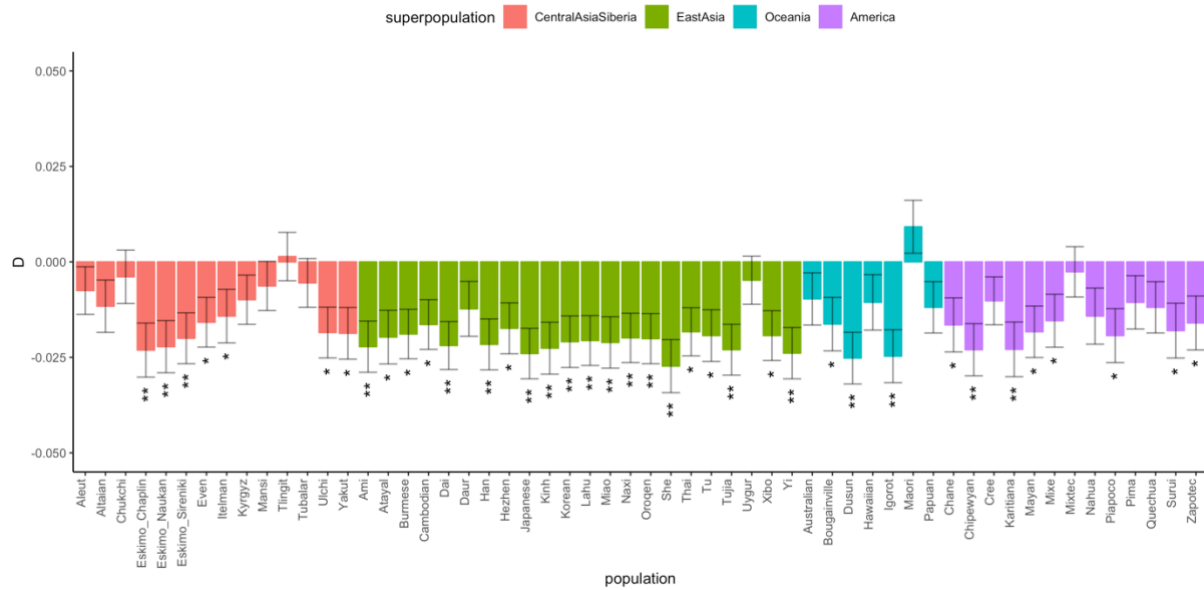

1201  
 1202 **Figure S5.13**  $D(Kostenki14, X; IUP\ BachoKiro, Mbuti)$  restricted to transversion  
 1203 polymorphisms where  $X$  is a present-day non-African population from Central Asia and  
 1204 Siberia, East Asia, South Asia, Oceania or Americas.  $D$  values denoted as bars plotted on  
 1205 the y-axis were calculated using ADMIXTOOLS<sup>3</sup> as implemented in *admixr*<sup>9</sup>. Positive  $D$ -value  
 1206 indicates higher proportion of alleles shared between IUP Bacho Kiro Cave individuals and  
 1207 *Kostenki 14*, whereas a negative  $D$ -value indicates higher proportion of alleles shared between  
 1208 IUP Bacho Kiro Cave individuals and a given present-day human population indicated on  $x$ -  
 1209 axis. Present-day human genomes from SGDP<sup>10</sup> were used in these statistics, and three Mbuti  
 1210 individuals from the same panel were used as outgroup. Two stars (\*\*) indicate a significant  $Z$ -  
 1211 score or  $|Z| \geq 3$ , and one star (\*) indicates  $|Z| \geq 2$ . Standard errors (SE) plotted around the centre  
 1212 of  $D$ -values were calculated using a Weighted Block Jackknife<sup>3,12</sup> across all autosomes on the  
 1213 “2200k” Panel (nsnps (IUP Bacho Kiro individuals) = 945,785) and a block size of 5 Mb.

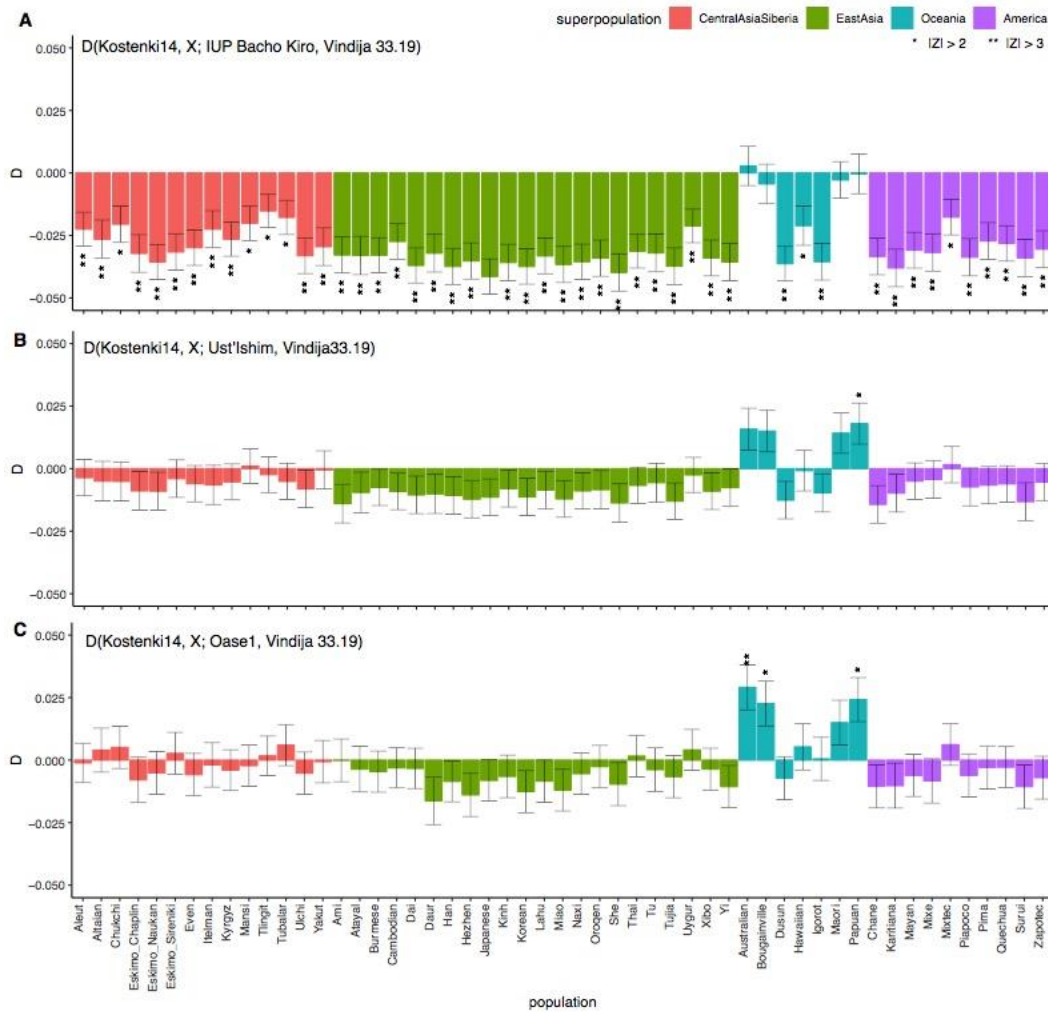

1214  
 1215 **Figure S5.14**  $D(\text{Kostenki14}, X; \text{IUP BachoKiro}/\text{Ust'Ishim}/\text{Oase1}, \text{Vindija 33.19})$  where  $X$  is  
 1216 a present-day non-African population from Central Asia and Siberia, East Asia, South  
 1217 Asia, Oceania or Americas. **A)** IUP Bacho Kiro Cave individuals, **B)** *Ust'Ishim* and **C)** *Oase*  
 1218 *1*.  $D$  values denoted as bars plotted on the y-axis were calculated using ADMIXTOOLS<sup>3</sup> as  
 1219 implemented in *admixr*<sup>9</sup>. Positive  $D$ -value indicates higher proportion of alleles shared between  
 1220 IUP Bacho Kiro Cave individuals (panel A), *Ust'Ishim* (panel B) or *Oase 1* (panel C) and  
 1221 *Kostenki 14*, whereas a negative  $D$ -value indicates higher proportion of alleles shared between  
 1222 former individuals and a given present-day human population indicated on  $x$ -axes. Present-day  
 1223 human genomes from SGDP<sup>10</sup> were used in these statistics, and *Vindija 33.19* Neandertal<sup>17</sup> was  
 1224 used as outgroup. Two stars (\*\*) indicate a significant Z-score or  $|Z| \geq 3$ , and one star (\*)  
 1225 indicates  $|Z| \geq 2$ . Standard errors (SE) plotted around  $D$ -values were calculated using a  
 1226 Weighted Block Jackknife<sup>3,12</sup> across all autosomes on the “2200k” Panel (nsnps (IUP Bacho  
 1227 Kiro individuals) = 1,813,821; nsnps (*Ust'Ishim*) = 1,951,462; nsnps (*Oase 1*) = 402,526) and  
 1228 a block size of 5 Mb.

## 1229 **Supplementary Information 6**

### 1230 **Admixture Graph Modelling**

1231

1232 We used program *qpGraph* (Admixture Graph) from ADMIXTOOLS<sup>1</sup> (version: v5.1) to test  
1233 models of the relationship among Initial Upper Palaeolithic Bacho KiroCave individuals,  
1234 ~34,000-year-old *Bacho Kiro BK1653* and other ancient modern humans from Eurasia older  
1235 than 30,000 years BP. Admixture Graph examines whether a proposed model or a graph fits  
1236 the data by determining whether the estimated values of all possible  $f_2$ -,  $f_3$ -, and  $f_4$ -statistics  
1237 among all pairs, triples, and quadruples of individuals or populations match the observed  
1238 values, and evaluates the significance of the difference between them using a Weighted Block  
1239 Jackknife<sup>1,2</sup>. We run *qpGraph* on the “2200k” SNP Panel, using a Weighted Block Jackknife  
1240 across all autosomes with a block size of 5 Mb and the following parameters:

1241

1242 outpop: NULL, blgsize: 0.005, lsqmode: YES, diag: .0001, hires: YES,  
1243 lambdascale: 1, useallsnps: NO, bigiter: 6, forcezmode: YES

1244

1245 We begin with a simple model (Fig. S6.1) that relates three high coverage Mbuti  
1246 individuals from SGDP<sup>3</sup>, the ~45,000-year-old *Ust’Ishim* from Siberia<sup>4</sup>, the ~40,000-year-old  
1247 *Tianyuan*<sup>5</sup> from China, the ~38,000-year-old *Kostenki14*<sup>6,7</sup> and the ~34,000-year-old  
1248 *SunghirIII*<sup>8</sup>, both from Russia. We use the capture data of *Kostenki14*<sup>7</sup> for most of our *qpGraph*  
1249 analyses due to the higher coverage of SNPs in the “2200k” Panel. In each of the Admixture  
1250 Graphs shown in this supplementary note labels on solid branches correspond to the estimated  
1251 drift in  $f_2$ -units of squared frequency difference and labels on the dotted edges give admixture  
1252 proportions.

skeleton.graph :: Mbu Tia Kos Sun 0.000000 0.001340 0.001340 0.000757 1.770

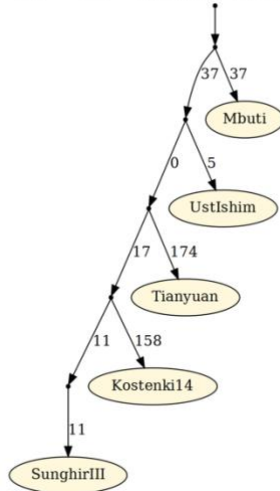

1253  
1254  
1255  
1256  
1257  
1258  
1259  
1260  
1261  
1262

**Figure S6.1 Base (skeleton) graph.** This model uses 886,336 SNPs covered in all individuals.

We proceed by attempting to fit the ~45,000-year-old Initial Upper Palaeolithic (IUP) *Bacho Kiro* individual with highest coverage (*Bacho Kiro F6-620*) to this base graph. We add *IUP Bacho Kiro F6-620* to all possible nodes of the graph in Fig. S6.1, either as a simple branch without mixture, or as a mixture between branches. Altogether, we identify two models that fit the data (maximum  $|Z\text{-score}| < 3$ ) and show these in Fig. S6.2. In both graphs the 40,000-year-old *Tianyuan* is modelled as a mixture with a lineage related to *Bacho Kiro F6-620*.

skeleton.addIUPBK1.admix.graph :: Mbu Mol Ust Kos 0.000000 -0.001935 -0.001935 0.000814 -2.378

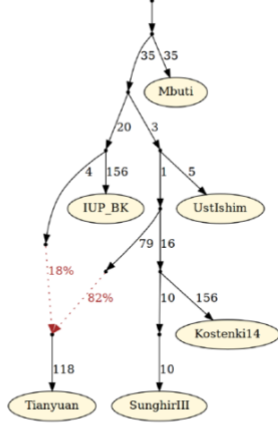

skeleton.addIUPBK1.admix2.graph :: Mbu Mol Ust Kos 0.000000 -0.001935 -0.001935 0.000814 -2.378

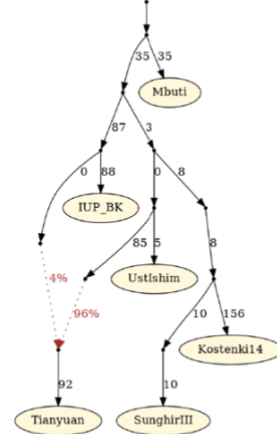

1263  
1264  
1265

**Figure S6.2 Adding *Bacho Kiro F6-620* to the base graph.** These models use 879,787 SNPs in all individuals.

1266            Given the higher Neandertal ancestry in *Bacho Kiro F6-620* than in other ancient  
 1267 modern humans included in these models (see Supplementary Information 7 and 8), we account  
 1268 for this and for the archaic ancestry in other ancient modern humans by adding the high  
 1269 coverage genomes of *Vindija 33.19* Neandertal<sup>9</sup> and *Denisova 3*<sup>10</sup> to the graphs in Fig. S6.2.  
 1270

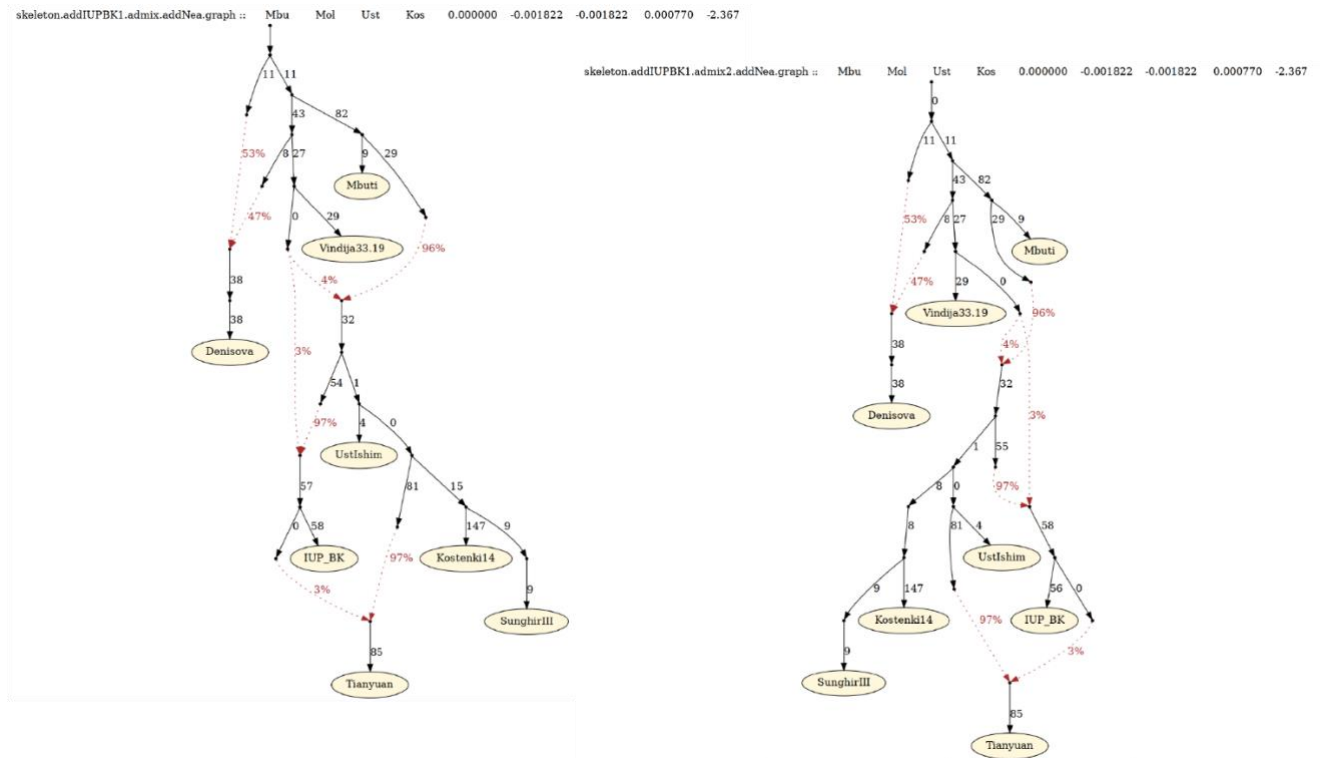

1271  
 1272  
 1273 **Figure S6.3 Adding *Vindija 33.19* Neandertal and *Denisova 3*.** These models use 832,495  
 1274 SNPs in all individuals.

1275  
 1276            We further proceed to fit the ~35,000-year-old *GoyetQ116-1* from Belgium<sup>7</sup>, the  
 1277 younger ~34,000-year-old *Bacho Kiro BK1653* and the ~30,000-year-old *Vestonice16* from  
 1278 Czech Republic<sup>7</sup> to the graphs in Fig. S6.3, starting with the oldest individual and moving  
 1279 forward in time.  
 1280

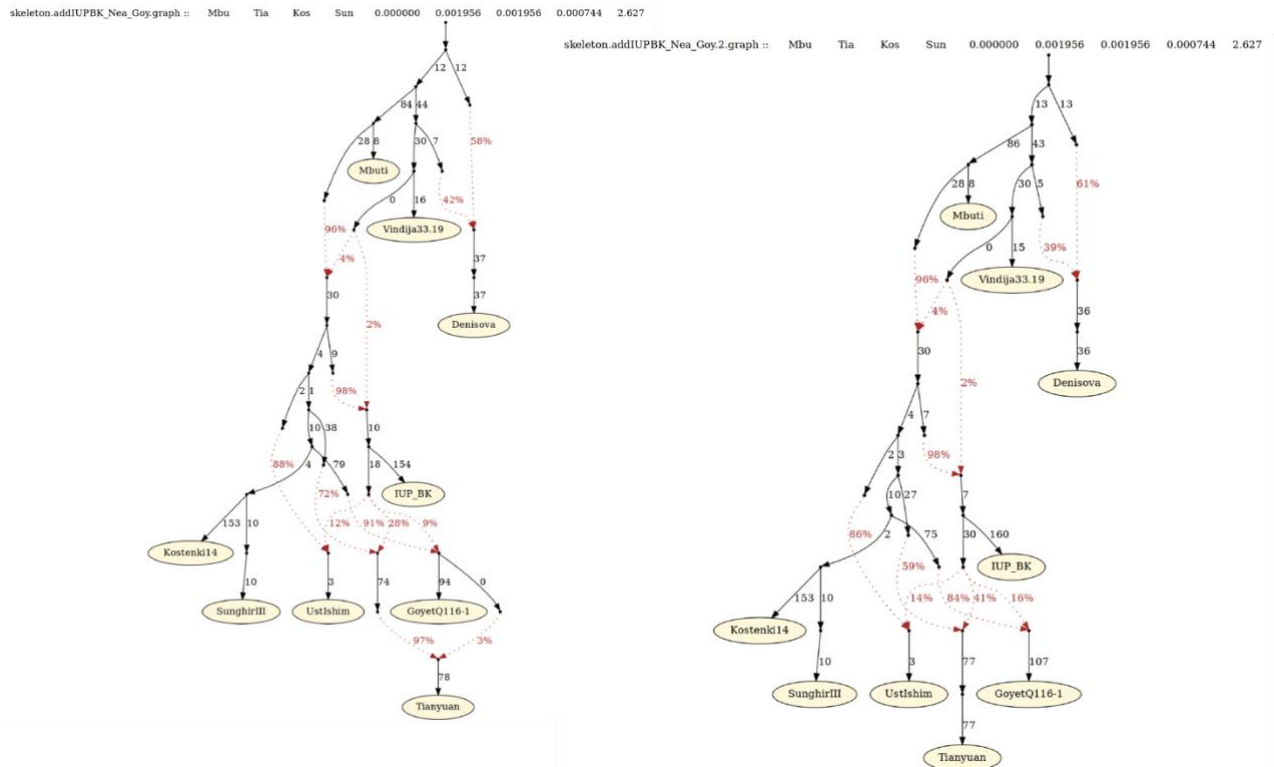

1281  
 1282 **Figure S6.4 Adding the ~35,000-year-old *Goyet Q116-1* from Belgium.** These models use  
 1283 520,102 SNPs in all individuals.

1284 Interestingly, after adding the ~35,000-year-old *Goyet Q116-1* to all the possible nodes  
 1285 shown in the Fig. S6.3 either as a simple branch without mixture or as a mixture between  
 1286 branches, the ~45,000-year-old *Ust'ishim*, the ~40,000-year-old *Tianyuan* and *Goyet Q116-1*  
 1287 all fit the models best as being admixed with a lineage related to the *Bacho Kiro F6-620*, with  
 1288 *Tianyuan* having the largest contribution from this lineage (between 28% and 41%, depending  
 1289 on the model). Furthermore, having part of the ancestry of *GoyetQ116-1* deriving from a lineage  
 1290 related to IUP *Bacho Kiro* eliminates the need for an additional admixture edge between  
 1291 *GoyetQ116-1* and *Tianyuan* (Fig. S6.4). We note, however, that both models with and without  
 1292 this additional admixture edge fit the data with no outliers (maximum  $|Z\text{-score}| < 3$ ) (Fig. S6.4).  
 1293 We also tested whether the connections observed between *Ust'ishim* or *GoyetQ116-1* and  
 1294 *Bacho Kiro F6-620* could be explained by the underlying models requiring an additional  
 1295 admixture edge from Neandertals to these individuals. However, these models are rejected ( $|Z\text{-}$   
 1296  $\text{score}| > 3$ ) in favour of the models presented in Fig. S6.4.

1297 We next add the ~34,000-year-old *Bacho Kiro I653* to the models in Fig. S6.4 either as  
 1298 a simple branch without mixture or as a mixture between branches. We infer for this individual  
 1299 to be best modelled as admixed between a lineage related to *GoyetQ116-1* and a lineage related  
 1300 to *Kostenki14/SungghirIII*, with one outlier remaining ( $f_4(\text{Mbuti}, \text{Tianyuan}; \text{Kostenki14},$   
 1301  $\text{Sungghir})$ ,  $Z\text{-score} = 3.01$ ). In the models highlighted in the Fig. S6.5, an additional admixture



1302 edge stemming from a deep Eurasian branch that splits before the separation of *IUP Bacho*  
 1303 *Kiro*, *Ust'Ishim* and other Eurasians is required to explain the data. These models fit the data  
 1304 best to the limits of our resolution, albeit with a single outlier (Z-score = 3.01). To investigate  
 1305 this outlier further, we compute the statistics  $D(\text{Mbuti}, \text{Tianyuan}; \text{Kostenki14}, \text{SunghirIII})$  and  
 1306 obtain a Z-score of 1.56 (all SNPs). Given the number of statistics we are computing to test the  
 1307 fit of these models to the data, we do not view a single outlier at  $|Z| > 3$  as a strong rejection of  
 1308 the models highlighted in Fig. S6.5.  
 1309

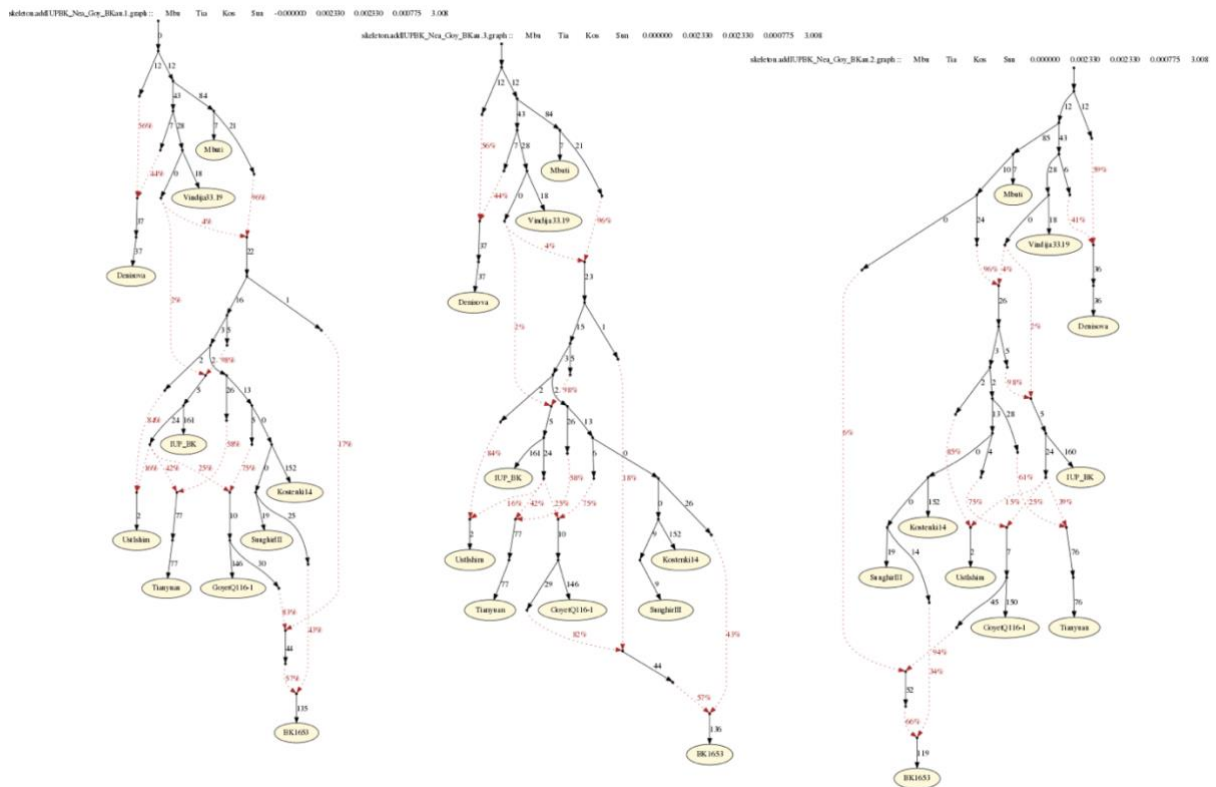

1310  
 1311 **Figure S6.5 Adding 34,000-year-old *Bacho Kiro* BK1653.** These models use 326,550 SNPs  
 1312 in all individuals.

1313 We added the ~30,000-year-old *Vestonice16* to all possible branches of the models  
 1314 outlined in the Fig. S6.5, removing in each case the deep branching lineage contributing to  
 1315 *Bacho Kiro* BK1653. Two models fit the data best (Fig. S6.6 and Fig. S6.7), albeit each with  
 1316 one outlier and still requiring a deep branching lineage, with either *Vestonice16* being admixed  
 1317 between lineages related to *Bacho Kiro* BK1653 and a lineage related to *Kostenki14/SunghirIII*  
 1318 or *Bacho Kiro* BK1653 being admixed between the lineages related to *GoyetQ116-1* and  
 1319 *Vestonice16*. In each case we are left with a single outlier to the data,  $f_4(\text{Tianyuan}, \text{SunghirIII};$   
 1320  $\text{GoyetQ116-1}, \text{BachoKiro BK1653})$  (Z-score = 3.22) and  $f_4(\text{Mbuti}, \text{Vestonice16}; \text{Kostenki14},$   
 1321  $\text{Vestonice16})$  (Z-score = 3.67).  
 1322

skeleton.add(UFBK1\_Nca\_Goy\_BKau\_Ves.g.nph :: Tia Sun Goy Bac -0.000288 0.003058 0.003316 0.001030 3.219

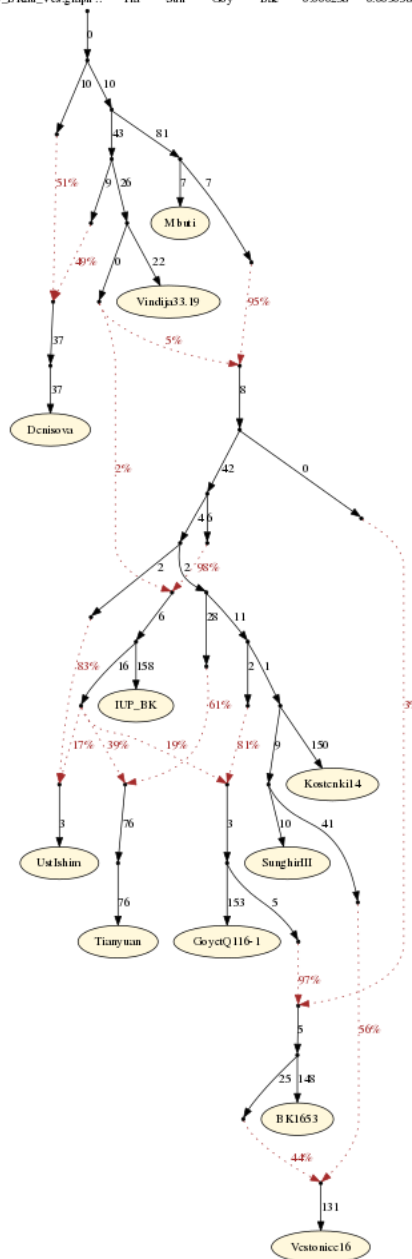

1323

1324

**Figure S6.6 Adding Vestonice16, with Vestonice16 being admixed.** This model uses 281,732

1325

SNPs in all individuals.

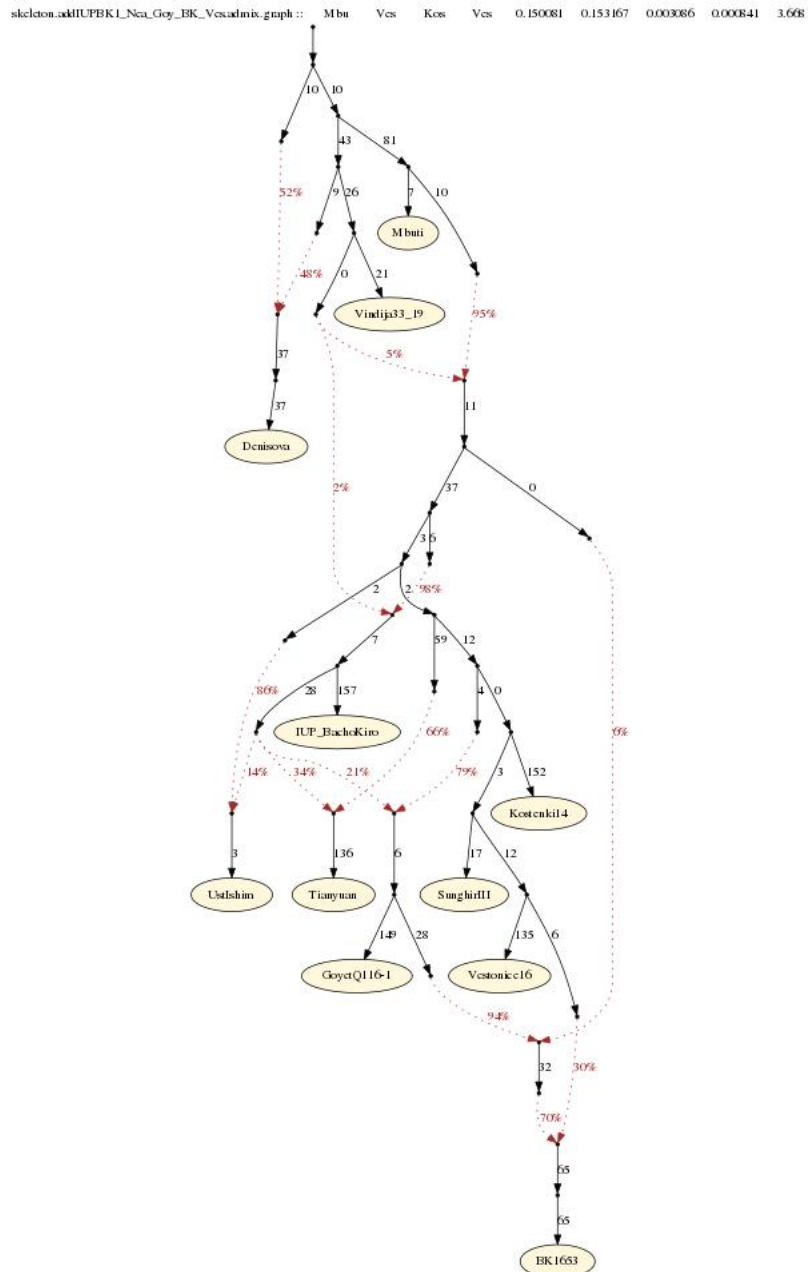

1326

1327

**Figure S6.7 Adding *Vestonice16*, with *Bacho Kiro* *BK1653* being admixed.** This model uses

1328

281,732 SNPs in all individuals.

1329

We additionally explored the relationship of *Bacho Kiro* *BK1653* to other Upper  
 1330 Palaeolithic West Eurasian ancient modern humans by reducing the graph to a smaller number  
 1331 of individuals (Fig S6.8). We confirm the placement of *Bacho Kiro* *BK1653* as being closest to  
 1332 a lineage related to *GoyetQ116-1*, further contributing her ancestry to *Vestonice16*, or  
 1333 alternatively being an admixed individual herself between the lineages related to *GoyetQ116-1*  
 1334 and *Kostenki14/SungirIII* or *Vestonice16* and *GoyetQ116-1*. All of these models fit with the  
 1335 data with no outliers, albeit with invoking a very small contribution of a lineage that splits off  
 1336 from *IUP Bacho Kiro*, *Ust'Ishim* and other Eurasians before they split from each other.

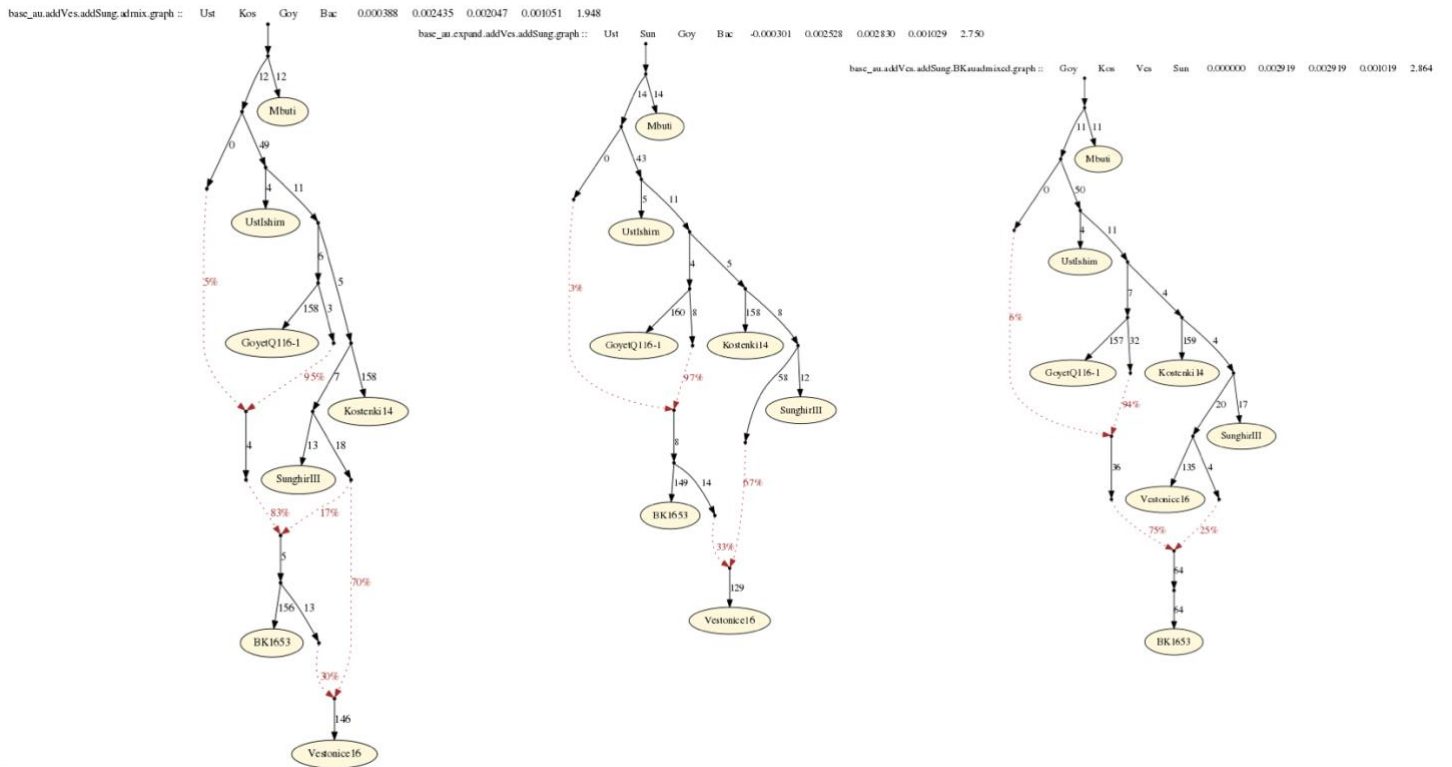

1  
 1338 **Figure S6.8 Admixture Graphs relating smaller number of ancient West Eurasians older**  
 1339 **than 30,000 years BP.** These models use 327,698 SNPs in all individuals.

1340 **References SI6:**

1341

1342 1 Patterson, N. *et al.* Ancient admixture in human history. *Genetics* **192**, 1065-1093,  
1343 doi:10.1534/genetics.112.145037 (2012).

1344 2 Busing, F. M. T. A., Meijer, E. & Van Der Leeden, R. Delete-m jackknife for unequal  
1345 m. *Statistics and Computing* **9**, 3-8, doi:Doi 10.1023/A:1008800423698 (1999).

1346 3 Mallick, S. *et al.* The Simons Genome Diversity Project: 300 genomes from 142 diverse  
1347 populations. *Nature* **538**, 201-206, doi:10.1038/nature18964 (2016).

1348 4 Fu, Q. *et al.* Genome sequence of a 45,000-year-old modern human from western  
1349 Siberia. *Nature* **514**, 445-449, doi:10.1038/nature13810 (2014).

1350 5 Yang, M. A. *et al.* 40,000-Year-Old Individual from Asia Provides Insight into Early  
1351 Population Structure in Eurasia. *Curr. Biol.* **27**, 3202-3208.e9, doi:  
1352 10.1016/j.cub.2017.09.030 (2017).

1353 6 Seguin-Orlando, A. *et al.* Genomic structure in Europeans dating back at least 36,200  
1354 years. *Science* **346**, 1113-1118, doi:10.1126/science.aaa0114 (2014).

1355 7 Fu, Q. *et al.* The genetic history of Ice Age Europe. *Nature* **534**, 200-205,  
1356 doi:10.1038/nature17993 (2016).

1357 8 Sikora, M. *et al.* Ancient genomes show social and reproductive behavior of early Upper  
1358 Paleolithic foragers. *Science* **358**, 659-662, doi: 10.1126/science.aao1807 (2017).

1359 9 Prüfer, K. *et al.* A high-coverage Neandertal genome from Vindija Cave in Croatia.  
1360 *Science* **358**, 655-658, doi: 10.1126/science.aao1887 (2017).

1361 10 Meyer, M. *et al.* A high-coverage genome sequence from an archaic Denisovan  
1362 individual. *Science* **338**, 222-226, doi:10.1126/science.1224344 (2012).

## 1363 **Supplementary Information 7**

### 1364 **Neandertal ancestry in Bacho Kiro individuals**

1365

#### 1366 **Estimates of Neandertal ancestry proportions**

1367 We calculated the proportion of Neandertal ancestry in Bacho Kiro individuals and other  
1368 ancient and present-day modern humans by computing a direct  $f_4$ -ratio that takes advantage of  
1369 the two high-coverage Neandertal genomes<sup>1</sup>, the ~130,000-year-old *Denisova 5* ('*Altai*')  
1370 Neandertal from Siberia<sup>2</sup> and the ~45,000-year-old *Vindija 33.19* Neandertal from Croatia<sup>3</sup>. We  
1371 also re-calculated the proportion of Neandertal ancestry in *Oase1* after merging previously  
1372 published data<sup>4</sup> with new data from additional libraries prepared for this study (see  
1373 Supplementary Information 2). We used ADMIXTOOLS<sup>5</sup> as implemented in the R package  
1374 *admixr*<sup>6</sup>, with a Weighted Block Jackknife<sup>5,7</sup> and a block size of 5 million base pairs (5Mb) to  
1375 calculate alpha ( $\alpha$ ) on the "2200k" SNP Panel as:

1376

$$1377 \alpha = \frac{f_4(\textit{Altai Neandertal}, \textit{Chimpanzee}; X, \textit{Mbuti})}{f_4(\textit{Altai Neandertal}, \textit{Chimpanzee}; \textit{Vindija 33.19 Neandertal}, \textit{Mbuti})}$$

1378

1379

1380 We find that Bacho Kiro individuals *F6-620*, *BB7-240* and *CC7-335* have 3.82% (95%  
1381 confidence interval (CI): 3.28-4.37%), 3.01% (95% CI: 2.43-3.58%) and 3.43% (95% CI: 2.84-  
1382 4.02%) Neandertal ancestry, respectively, which is more than the average of 1.95% (95% CI:  
1383 1.52-2.38%) found in other Upper Palaeolithic modern humans older than 30,000 years BP,  
1384 with the exception of *Oase1*<sup>4</sup> (6.39% (95% CI: 5.65-7.13%)) (Extended Data Figure 6A). In  
1385 contrast, Bacho Kiro *BK1653* has 1.91% (95% CI: 1.44-2.37%) Neandertal ancestry, similar to  
1386 other ancient and present-day modern humans (Extended Data Figure 6A).

1387 To test formally if IUP Bacho Kiro individuals share significantly more derived alleles  
1388 with archaics than other ancient and present-day humans, we computed  $D(\textit{IUP Bacho Kiro},$   
1389  $\textit{Test}; \textit{Neandertal}, \textit{Outgroup})$ . We used the genomes of Dinka, Yoruba and Mbuti individuals  
1390 from the Simons Genome Diversity Panel (SGDP)<sup>8</sup> as outgroups. Since these statistics are  
1391 expected to be skewed significantly positive for the Upper Palaeolithic individuals such as the  
1392 ~45,000-year-old *Ust'Ishim* (Fig. S7.4) and the ~38,000-year-old *Kostenki14* (Fig. S7.6) due to  
1393 gene-flow with Africans<sup>1</sup> or when a *Test* individual post-dates the introduction of "Basal  
1394 Eurasian" ancestry<sup>9,10</sup>, we compute the same statistics using the genome of a chimpanzee  
1395 (*panTro2*) as an outgroup and restricting analyses to transversion polymorphisms to mitigate  
1396 the effect of ancient DNA damage (Fig. S7.8-S7.14).

1397 We find that IUP Bacho Kiro Cave individuals share significantly more derived alleles  
1398 with the three high coverage Neandertals<sup>2,3,11</sup> than most other Upper Palaeolithic ancient  
1399 humans (Fig. S7.1-S7.3 and Fig. S7.8-S7.10) with an exception of *Oase1*<sup>4</sup> ( $Z$ -score  $< -3.01$ ).  
1400 They also share significantly more alleles with Neandertals than present-day non-Africans (Fig.  
1401 S7.8-S7.10), similar to *Oase1* (Fig. S7.12) and unlike *Ust'Ishim* (Fig. S7.11), *Kostenki14* (Fig.  
1402 S7.13) or Bacho Kiro *BK1653* (Fig. S7.14). When present-day Papuans, Australians and  
1403 Bougainville individuals are used as a *Test* population, the statistics  $D(IUP\ Bacho\ Kiro, Test;$   
1404  $Neandertal, Outgroup)$  are not significantly different from 0 (Fig. S7.8-S7.10), likely due to the  
1405 additional gene flow from Denisovans, a sister group of Neandertals, into these populations<sup>12-</sup>  
1406 <sup>15</sup>.

1407

### 1408 **Introgressing Neandertal(s)**

1409 We tested if IUP Bacho Kiro Cave individuals share more derived alleles with one of the already  
1410 sequenced Neandertal genomes by calculating  $D(Archaic_1, Archaic_2; IUP\ Bacho\ Kiro,$   
1411  $Outgroup)$ . We first investigated whether there is a significant difference in derived allele  
1412 sharing with the genomes of the ~50,000-year-old *Denisova 3* individual and any of the high  
1413 coverage Neandertals (~130,000-year-old *Altai*<sup>2</sup> Neandertal, ~80,000-year-old *Chagyrskaya*  
1414 *8*<sup>11</sup> and ~45,000-year-old *Vindija 33.19*<sup>3</sup>) or if there are differences in allele sharing when  
1415 comparing between the high coverage Neandertals. For the high-coverage genomes of the  
1416 archaics we used their *snpAD*<sup>3,16</sup> genotype calls that overlap positions on the “2200k” SNP  
1417 Panel. We used the genomes of *panTro2*, and Dinka, Yoruba and Mbuti individuals from the  
1418 Simons Genome Diversity Panel (SGDP)<sup>8</sup> as outgroups.

1419 We find that Bacho Kiro individuals share significantly more derived alleles with  
1420 Neandertals than with the Denisovan individual ( $Z$ -score  $< -26.27$ , Fig. S7.15 and S7.16).  
1421 Furthermore, the three IUP Bacho Kiro individuals and *BK1653* share significantly more  
1422 derived alleles with *Chagyrskaya 8* and *Vindija 33.19* than they do with the *Altai* Neandertal ( $-$   
1423  $5.08 < Z$ -score  $< -2.77$ , Fig. S7.15, and  $-5.03 < Z$ -score  $< -3.01$ , Fig. S7.16), similar to what has  
1424 been previously observed for other ancient and present-day humans<sup>3,11,17</sup>.

1425 **Investigating overlapping sites with late Neandertals and *Mezmaiskaya1***

1426 Given that IUP Bacho Kiro Cave individuals overlap in time with late Neandertals, we co-  
1427 analysed the low-coverage late Neandertal genomes of *Les Cottés Z4-1514*, *Goyet Q56-1*,  
1428 *Mezmaiskaya 2* and *Spy 94a*<sup>17</sup> with the genome of a >70,000-year-old *Mezmaiskaya 1*  
1429 Neandertal<sup>3</sup> and the high-coverage archaic genomes. For the late Neandertals and *Mezmaiskaya*  
1430 *1*, we randomly sampled an allele from fragments longer than 35 base pairs that had a mapping  
1431 quality of at least 25 and that overlapped positions on the “2200k” SNP Panel. The analyses  
1432 involving low-coverage Neandertals were further restricted to the fragments that showed C-to-  
1433 T substitutions with respect to the human reference genome in the first and/or last three  
1434 positions to diminish the impact of present-day human DNA contamination<sup>18</sup> that was  
1435 previously inferred for these samples<sup>3,17</sup>. To make these analyses comparable with those of  
1436 high-coverage archaics and minimize the differences in the statistics that involve genomes of  
1437 substantially different qualities, we followed the same filtering as above for the high coverage  
1438 *Altai* and *Vindija 33.19* Neandertals and randomly sampled an allele from fragments longer  
1439 than 35 base pairs that had a mapping quality of at least 25 and that overlapped positions on the  
1440 “2200k” SNP Panel, thereby effectively lowering the qualities of the high coverage genomes  
1441 to similar levels as the low-coverage Neandertals.

1442 However, the number of informative sites in low-coverage Neandertals that overlap  
1443 “2200k” SNP Panel is low (Tab. S7.1). This is best demonstrated calculating  $D(\textit{Altai}$   
1444  $\textit{Neandertal}, \textit{Vindija}33.19; \textit{Modern Human Test}, \textit{Outgroup})$  where down-sampling high-  
1445 coverage Neandertal genomes to the coverage of late Neandertals and *Mezmaiskaya1* causes  
1446 otherwise significantly positive statistics (Fig. S7.15 and Fig. S7.16) to become not  
1447 significantly different from 0 (Fig. S7.17). Thus, we do not have enough power to detect any  
1448 potential differences among late Neandertal populations that contributed additional Neandertal  
1449 ancestry to IUP Bacho Kiro individuals when compared to other ancient modern humans, even  
1450 if such differences may exist.

1451

1452 **References SI7:**

- 1453 1 Petr, M., Pääbo, S., Kelso, J. & Vernot, B. Limits of long-term selection against  
1454 Neandertal introgression. *Proc. Natl. Acad. Sci. U.S.A.* **116**, 1639-1644 (2019).
- 1455 2 Prüfer, K. *et al.* The complete genome sequence of a Neanderthal from the Altai  
1456 Mountains. *Nature* **505**, 43-49, doi:10.1038/nature12886 (2014).
- 1457 3 Prüfer, K. *et al.* A high-coverage Neandertal genome from Vindija Cave in Croatia.  
1458 *Science* **358**, 655-658, doi: 10.1126/science.aao1887 (2017).



- 1459 4 Fu, Q. *et al.* An early modern human from Romania with a recent Neanderthal ancestor.  
1460 *Nature* **524**, 216-219, doi:10.1038/nature14558 (2015).
- 1461 5 Patterson, N. *et al.* Ancient admixture in human history. *Genetics* **192**, 1065-1093,  
1462 doi:10.1534/genetics.112.145037 (2012).
- 1463 6 Petr, M., Vernot, B. & Kelso, J. admixr—R package for reproducible analyses using  
1464 ADMIXTOOLS. *Bioinformatics* **35**, 3194-3195 (2019).
- 1465 7 Busing, F. M. T. A., Meijer, E. & Van Der Leeden, R. Delete-m jackknife for unequal  
1466 m. *Statistics and Computing* **9**, 3-8, doi:Doi 10.1023/A:1008800423698 (1999).
- 1467 8 Mallick, S. *et al.* The Simons Genome Diversity Project: 300 genomes from 142 diverse  
1468 populations. *Nature* **538**, 201-206, doi:10.1038/nature18964 (2016).
- 1469 9 Lazaridis, I. *et al.* Ancient human genomes suggest three ancestral populations for  
1470 present-day Europeans. *Nature* **513**, 409-413, doi:10.1038/nature13673 (2014).
- 1471 10 Lazaridis, I. *et al.* Genomic insights into the origin of farming in the ancient Near East.  
1472 *Nature* **536**, 419-424 (2016).
- 1473 11 Mafessoni, F. *et al.* A high-coverage Neandertal genome from Chagyrskaya Cave. *Proc.*  
1474 *Natl. Acad. Sci. U.S.A.* **117**, 15132-15136, doi:10.1073/pnas.2004944117 (2020).
- 1475 12 Reich, D. *et al.* Genetic history of an archaic hominin group from Denisova Cave in  
1476 Siberia. *Nature* **468**, 1053-1060, doi:10.1038/nature09710 (2010).
- 1477 13 Meyer, M. *et al.* A high-coverage genome sequence from an archaic Denisovan  
1478 individual. *Science* **338**, 222-226, doi:10.1126/science.1224344 (2012).
- 1479 14 Vernot, B. *et al.* Excavating Neandertal and Denisovan DNA from the genomes of  
1480 Melanesian individuals. *Science* **352**, 235-239, doi:10.1126/science.aad9416 (2016).
- 1481 15 Sankararaman, S., Mallick, S., Patterson, N. & Reich, D. The Combined Landscape of  
1482 Denisovan and Neanderthal Ancestry in Present-Day Humans. *Curr. Biol.* **26**, 1241-  
1483 1247, doi:10.1016/j.cub.2016.03.037 (2016).
- 1484 16 Prüfer, K. snpAD: An ancient DNA genotype caller. *Bioinformatics* **34**, 4165-4171  
1485 (2018).
- 1486 17 Hajdinjak, M. *et al.* Reconstructing the genetic history of late Neanderthals. *Nature* **555**,  
1487 652-656, doi:10.1038/nature26151 (2018).
- 1488 18 Meyer, M. *et al.* A mitochondrial genome sequence of a hominin from Sima de los  
1489 Huesos. *Nature* **505**, 403-406, doi:10.1038/nature12788 (2014).
- 1490 19 Fu, Q. *et al.* The genetic history of Ice Age Europe. *Nature* **534**, 200-205,  
1491 doi:10.1038/nature17993 (2016).

1492 **Table S7.1 Number of informative sites in late Neandertals and *Mezmaiskaya1***  
 1493 **overlapping “2200k” SNP Panel after filtering for fragments  $\geq 35$  bp and  $MQ \geq 25$  that**  
 1494 **showed C-to-T substitutions in the first three and/or the last three positions relative to the**  
 1495 **reference genome.**

| Individual                | # of SNPs | # of transversion SNPs |
|---------------------------|-----------|------------------------|
| <i>Les Cottés Z4-1514</i> | 1,074,561 | 587,467                |
| <i>Spy 94a</i>            | 330,889   | 182,085                |
| <i>Goyet Q56-1</i>        | 446,309   | 238,416                |
| <i>Mezmaiskaya 2</i>      | 760,142   | 402,957                |
| <i>Mezmaiskaya 1</i>      | 546,819   | 306,969                |

1496

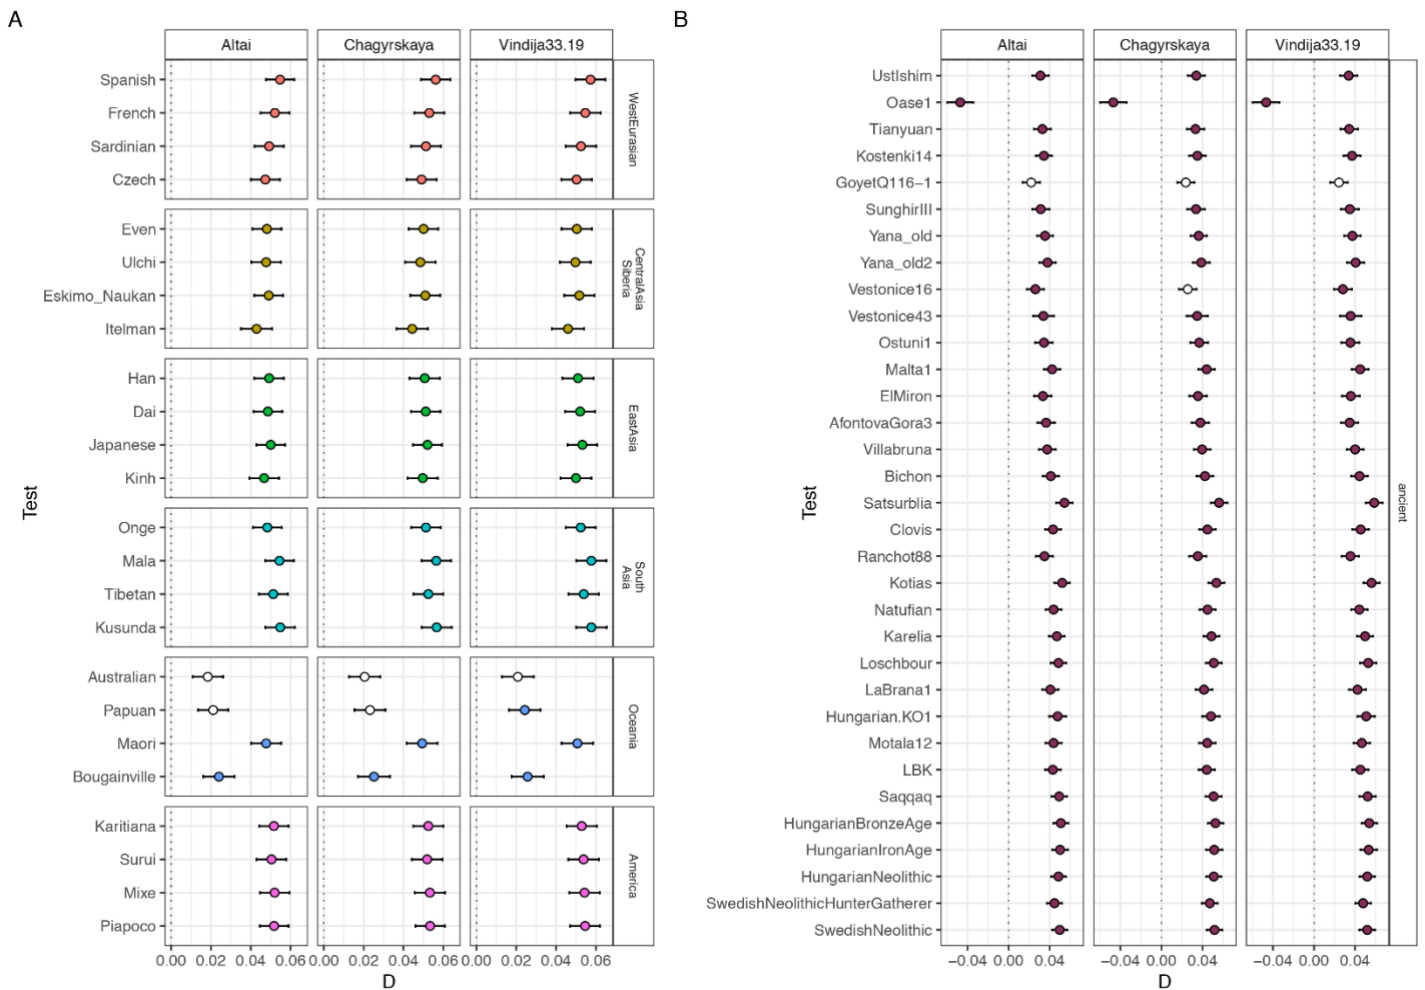

1498 **Figure S7.1 D-statistics comparing derived allele sharing with an archaic genome between**  
 1499 **IUP Bacho Kiro F6-620 and a range of present-day and ancient modern humans.** Values  
 1500 for  $D(\text{Bacho Kiro F6-620}, \text{Test}; \text{Archaic}, \text{Mbuti})$  denoted as circles are plotted on the x-axes  
 1501 where *Archaic* is a high-coverage Neandertal genome<sup>2,3,11</sup> and *Test* is either a present-day  
 1502 population from SGDP<sup>8</sup> (panel A) or an ancient individual (panel B). Three Mbuti individuals  
 1503 from SGDP<sup>8</sup> were used as outgroup. *D* statistics were calculated using ADMIXTOOLS<sup>5</sup> as  
 1504 implemented in *admixr*<sup>6</sup>. Filled-in circles indicate a significant Z-score or  $|Z| \geq 3$ , and open  
 1505 circles indicate a non-significant Z-score or  $|Z| < 3$ . Whiskers on each side of the plotted *D*  
 1506 values correspond to one standard error calculated with a Weighted Block Jackknife<sup>5,7</sup> and a  
 1507 block size of 5 Mb across all autosomes on the “2200k” Panel (nsnps (*Bacho Kiro F6-620*) =  
 1508 1,779,883).

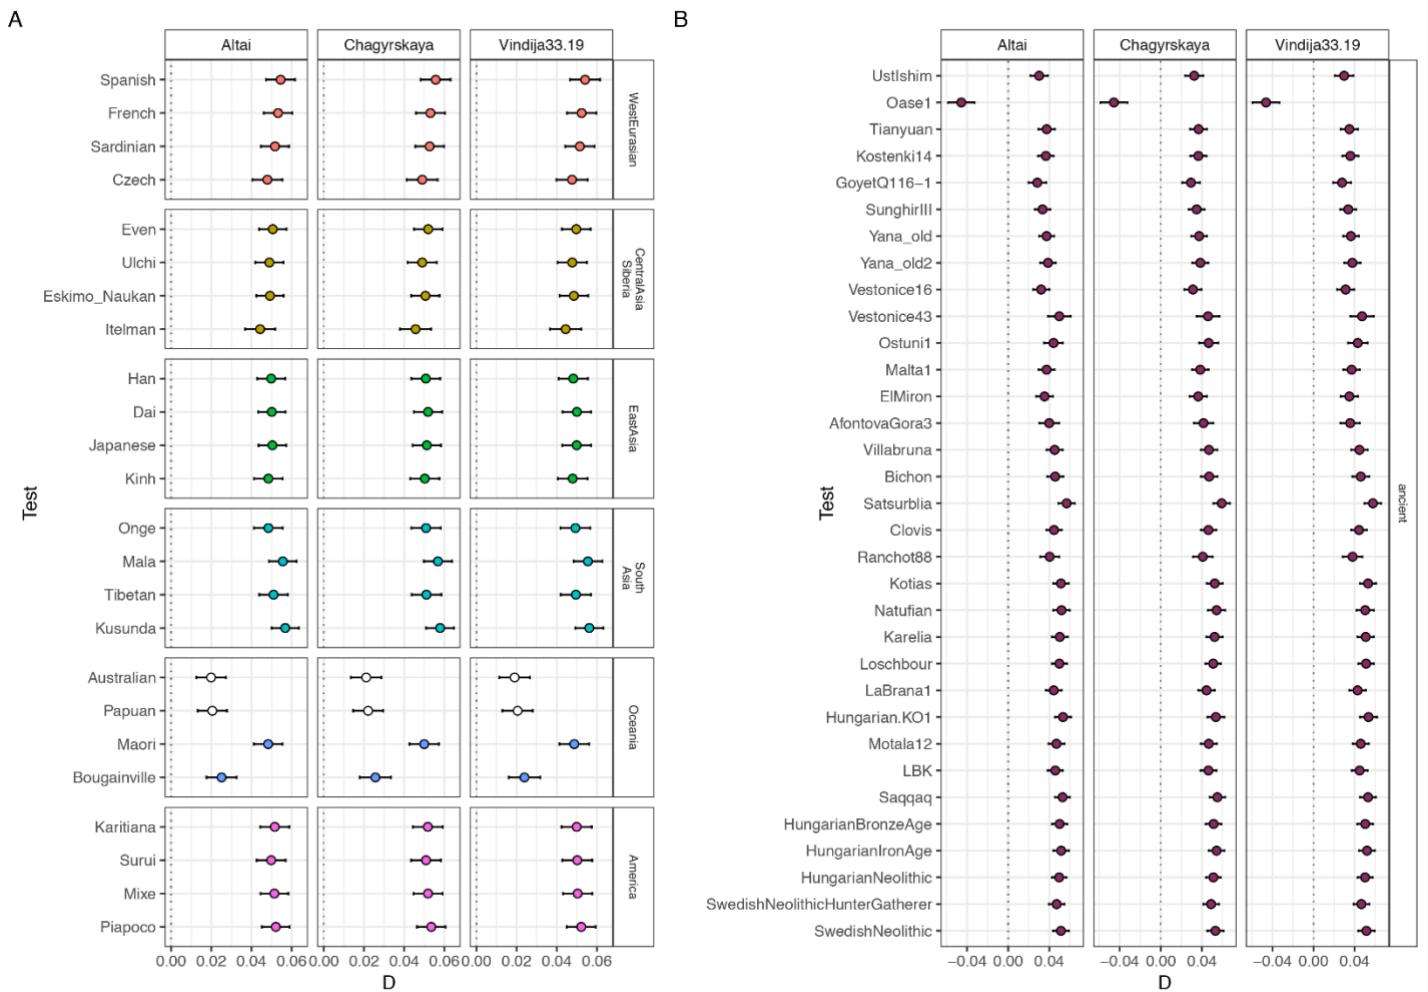

1510 **Figure S7.2 D-statistics comparing derived allele sharing with an archaic genome between**  
 1511 **IUP Bacho Kiro BB7-240 and a range of present-day and ancient modern humans.**  
 1512 Values for  $D(\text{Bacho Kiro BB7-240}, \text{Test}; \text{Archaic}, \text{Mbuti})$  denoted as circles are plotted on the  
 1513  $x$ -axes where *Archaic* is a high-coverage Neandertal genome<sup>2,3,11</sup> and *Test* is either a present-  
 1514 day population from SGDP<sup>8</sup> (panel A) or an ancient individual (panel B). Three Mbuti  
 1515 individuals from SGDP<sup>8</sup> were used as outgroup.  $D$  statistics were calculated using  
 1516 ADMIXTOOLS<sup>5</sup> as implemented in *admixr*<sup>6</sup>. Filled-in circles indicate a significant  $Z$ -score or  
 1517  $|Z| \geq 3$ , and open circles indicate a non-significant  $Z$ -score or  $|Z| < 3$ . Whiskers on each side of  
 1518 the plotted  $D$  values correspond to standard errors calculated with a Weighted Block  
 1519 Jackknife<sup>5,7</sup> and a block size of 5 Mb across all autosomes on the “2200k” Panel (nsnps (*Bacho*  
 1520 *Kiro BB7-240*) = 787,706).

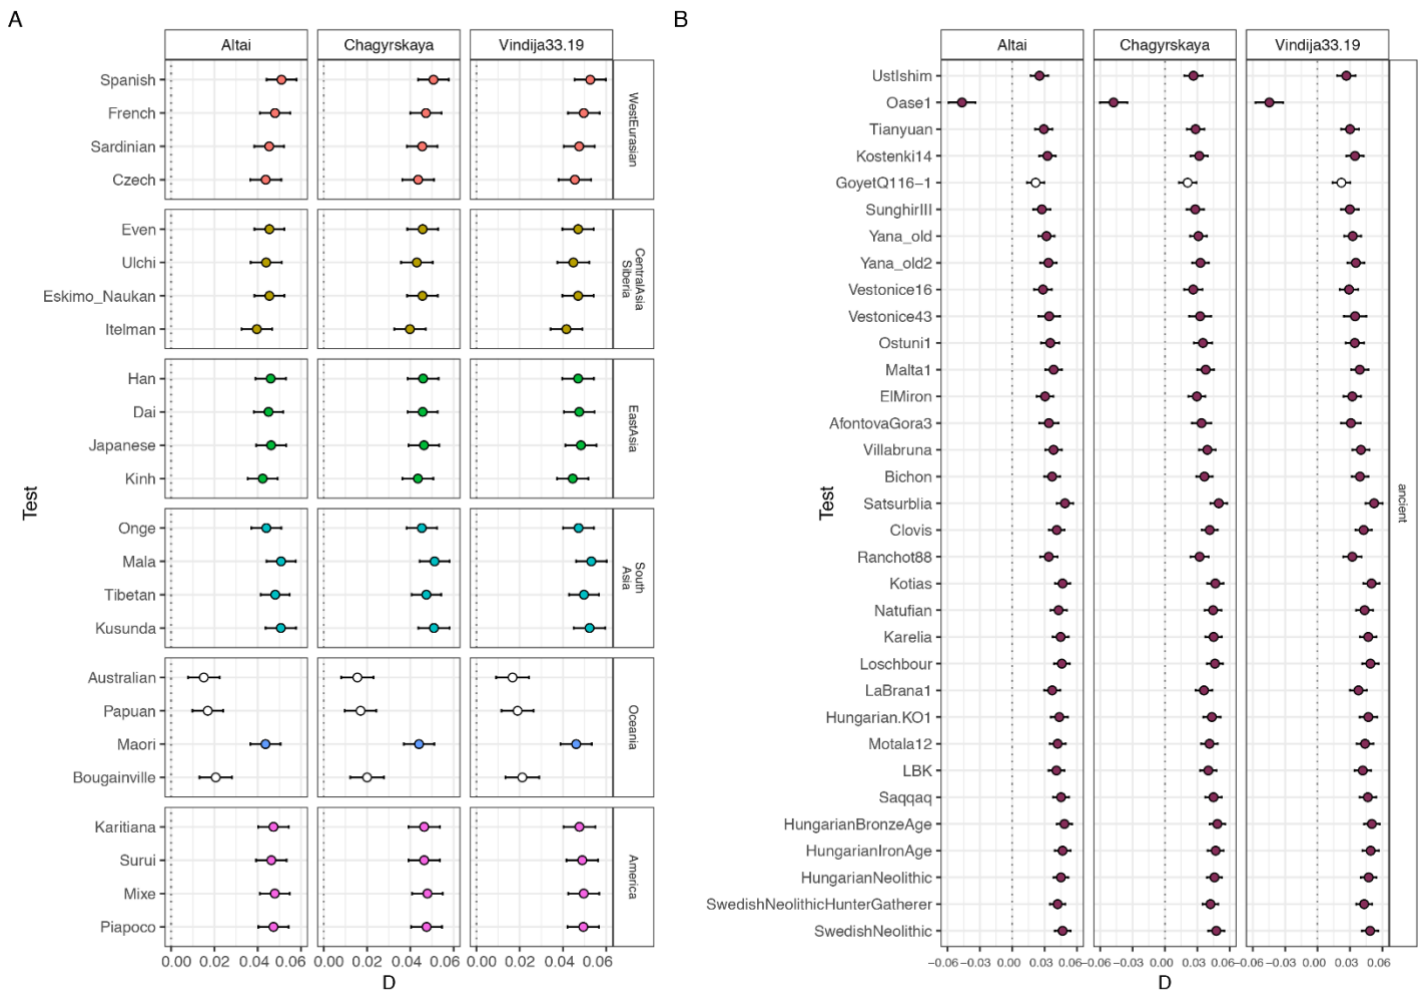

1522 **Figure S7.3 D-statistics comparing derived allele sharing with an archaic genome between**  
 1523 **IUP Bacho Kiro CC7-335 and a range of present-day and ancient modern humans.**  
 1524 Values for  $D(\text{Bacho Kiro CC7-335}, \text{Test}; \text{Archaic}, \text{Mbuti})$  denoted as circles are plotted on the  
 1525  $x$ -axes where *Archaic* is a high-coverage Neandertal<sup>2,3,11</sup> genome and *Test* is either a present-  
 1526 day population from SGDP<sup>8</sup> (panel A) or an ancient individual (panel B). Three Mbuti  
 1527 individuals from SGDP<sup>8</sup> were used as outgroup.  $D$  statistics were calculated using  
 1528 ADMIXTOOLS<sup>5</sup> as implemented in *admixr*<sup>6</sup>. Filled-in circles indicate a significant  $Z$ -score or  
 1529  $|Z| \geq 3$ , and open circles indicate a non-significant  $Z$ -score or  $|Z| < 3$ . Whiskers on each side of  
 1530 the plotted  $D$  values correspond to one standard error calculated using a Weighted Block  
 1531 Jackknife<sup>5,7</sup> and a block size of 5 Mb across all autosomes on the “2200k” Panel (nsnps (*Bacho*  
 1532 *Kiro CC7-335*) = 723,129).

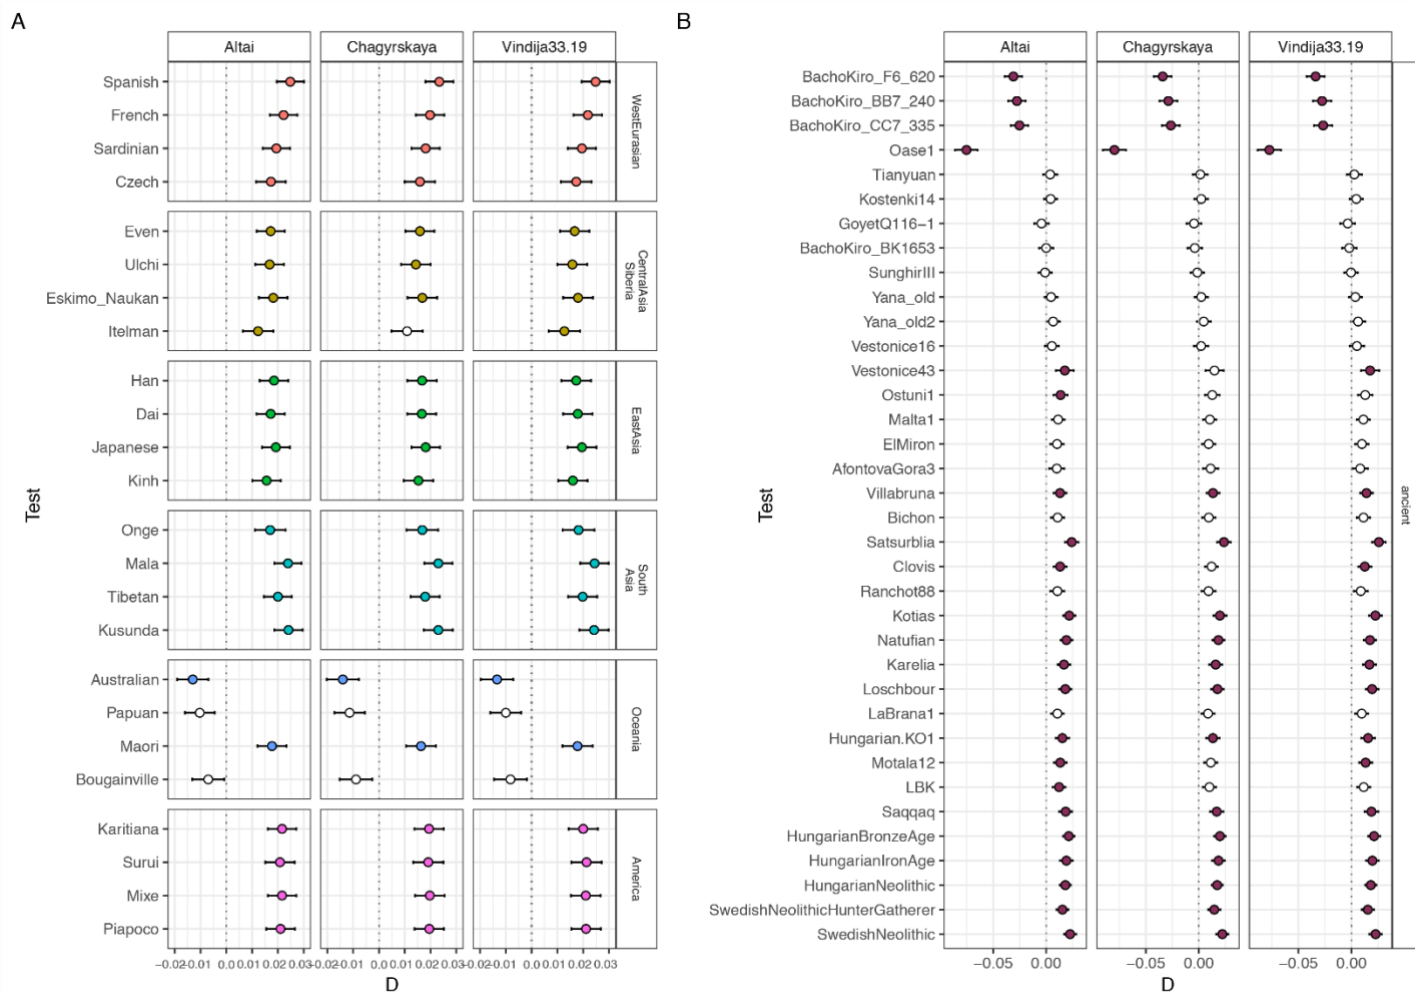

1534 **Figure S7.4 D-statistics comparing derived allele sharing with an archaic genome between**  
 1535 **~45,000-year-old *Ust'Ishim* from Siberia and a range of present-day and ancient modern**  
 1536 **humans.** Values for  $D(Ust'Ishim, Test; Archaic, Mbuti)$  denoted as circles are plotted on the  $x$ -  
 1537 axes where *Archaic* is a high-coverage Neandertal<sup>2,3,11</sup> genome and *Test* is either a present-day  
 1538 population from SGDP<sup>8</sup> (panel A) or an ancient individual (panel B). Three Mbuti individuals  
 1539 from SGDP<sup>8</sup> were used as outgroup.  $D$  statistics were calculated using ADMIXTOOLS<sup>5</sup> as  
 1540 implemented in *admixr*<sup>6</sup>. Filled-in circles indicate a significant  $Z$ -score or  $|Z| \geq 3$ , and open  
 1541 circles indicate a non-significant  $Z$ -score or  $|Z| < 3$ . Whiskers on each side of the plotted  $D$   
 1542 values correspond to one standard error calculated using a Weighted Block Jackknife<sup>5,7</sup> and a  
 1543 block size of 5 Mb across all autosomes on the “2200k” Panel (nsnps (*Ust'Ishim*) = 1,951,462).

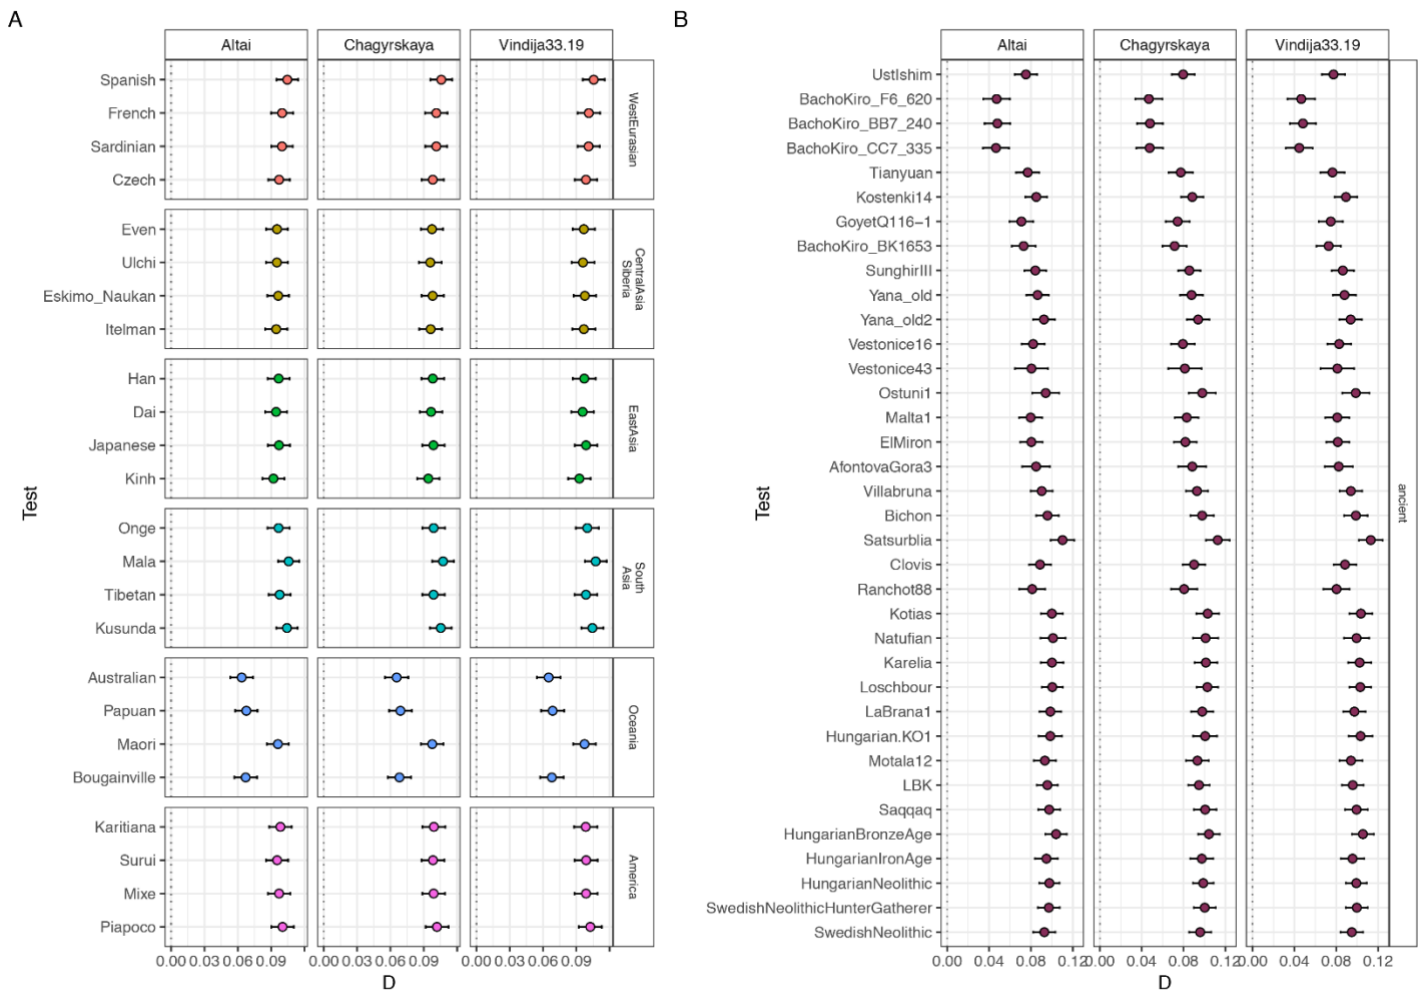

1545 **Figure S7.5 D-statistics comparing derived allele sharing with an archaic genome between**  
 1546 ***Oase1* and a range of present-day and ancient modern humans.** Values for  $D(Oase1, Test;$   
 1547  $Archaic, Mbuti)$  denoted as circles are plotted on the  $x$ -axes where *Archaic* is a high-coverage  
 1548 Neandertal<sup>2,3,11</sup> genome and *Test* is either a present-day population from SGDP<sup>8</sup> (panel A) or  
 1549 an ancient individual (panel B). Three Mbuti individuals from SGDP<sup>8</sup> were used as outgroup.  
 1550  $D$  statistics were calculated using ADMIXTOOLS<sup>5</sup> as implemented in *admixr*<sup>6</sup>. We used a  
 1551 merged dataset of *Oase1* from this and the previous study. Filled-in circles indicate a significant  
 1552  $Z$ -score or  $|Z| \geq 3$ , and open circles indicate a non-significant  $Z$ -score or  $|Z| < 3$ . Whiskers on  
 1553 each side of the plotted  $D$  values correspond to one standard error calculated using a Weighted  
 1554 Block Jackknife<sup>5,7</sup> and a block size of 5 Mb across all autosomes on the “2200k” Panel (nsnps  
 1555 (*Oase 1*) = 402,526).

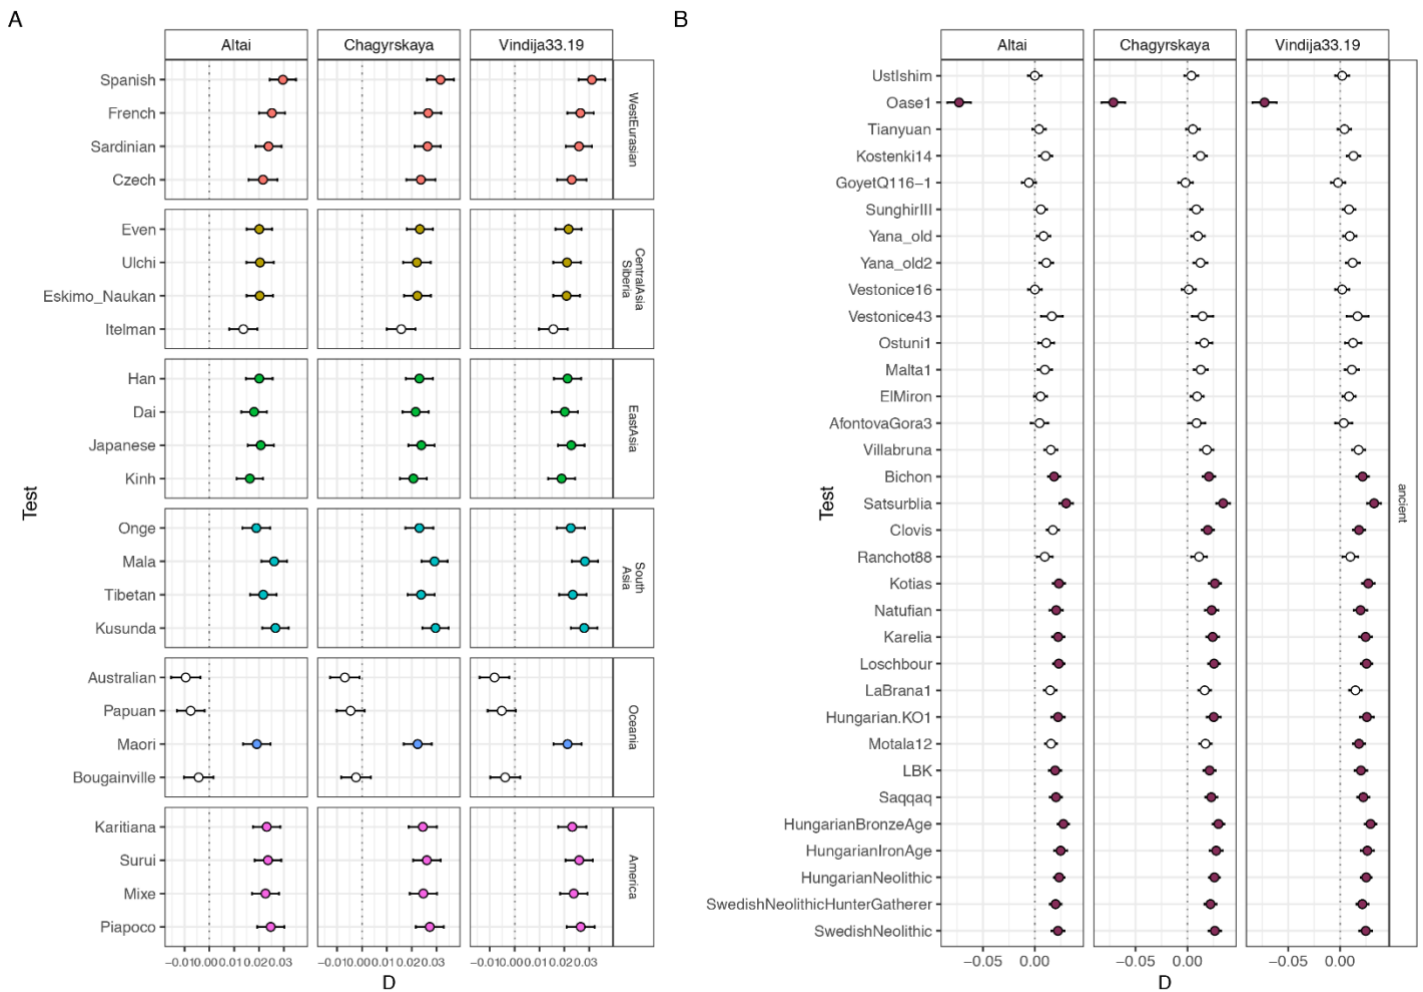

1557 **Figure S7.6 D-statistics comparing derived allele sharing with an archaic genome between**  
 1558 **Bacho Kiro BK1653 and a range of present-day and ancient modern humans.** Values for  
 1559  $D(\text{Bacho Kiro BK1653}, \text{Test}; \text{Archaic}, \text{Mbuti})$  denoted as circles are plotted on the  $x$ -axes where  
 1560 *Archaic* is a high-coverage Neandertal<sup>2,3,11</sup> genome and *Test* is either a present-day population  
 1561 from SGDP<sup>8</sup> (panel A) or an ancient individual (panel B). Three Mbuti individuals from SGDP<sup>8</sup>  
 1562 were used as outgroup.  $D$  statistics were calculated using ADMIXTOOLS<sup>5</sup> as implemented in  
 1563 *admixr*<sup>6</sup>. Filled-in circles indicate a significant  $Z$ -score or  $|Z| \geq 3$ , and open circles indicate a  
 1564 non-significant  $Z$ -score or  $|Z| < 3$ . Whiskers on each side of the plotted  $D$  values correspond to  
 1565 one standard error calculated using a Weighted Block Jackknife<sup>5,7</sup> and a block size of 5 Mb  
 1566 across all autosomes on the “2200k” Panel (nsnps (*Bacho Kiro BK1653*) = 825,379).



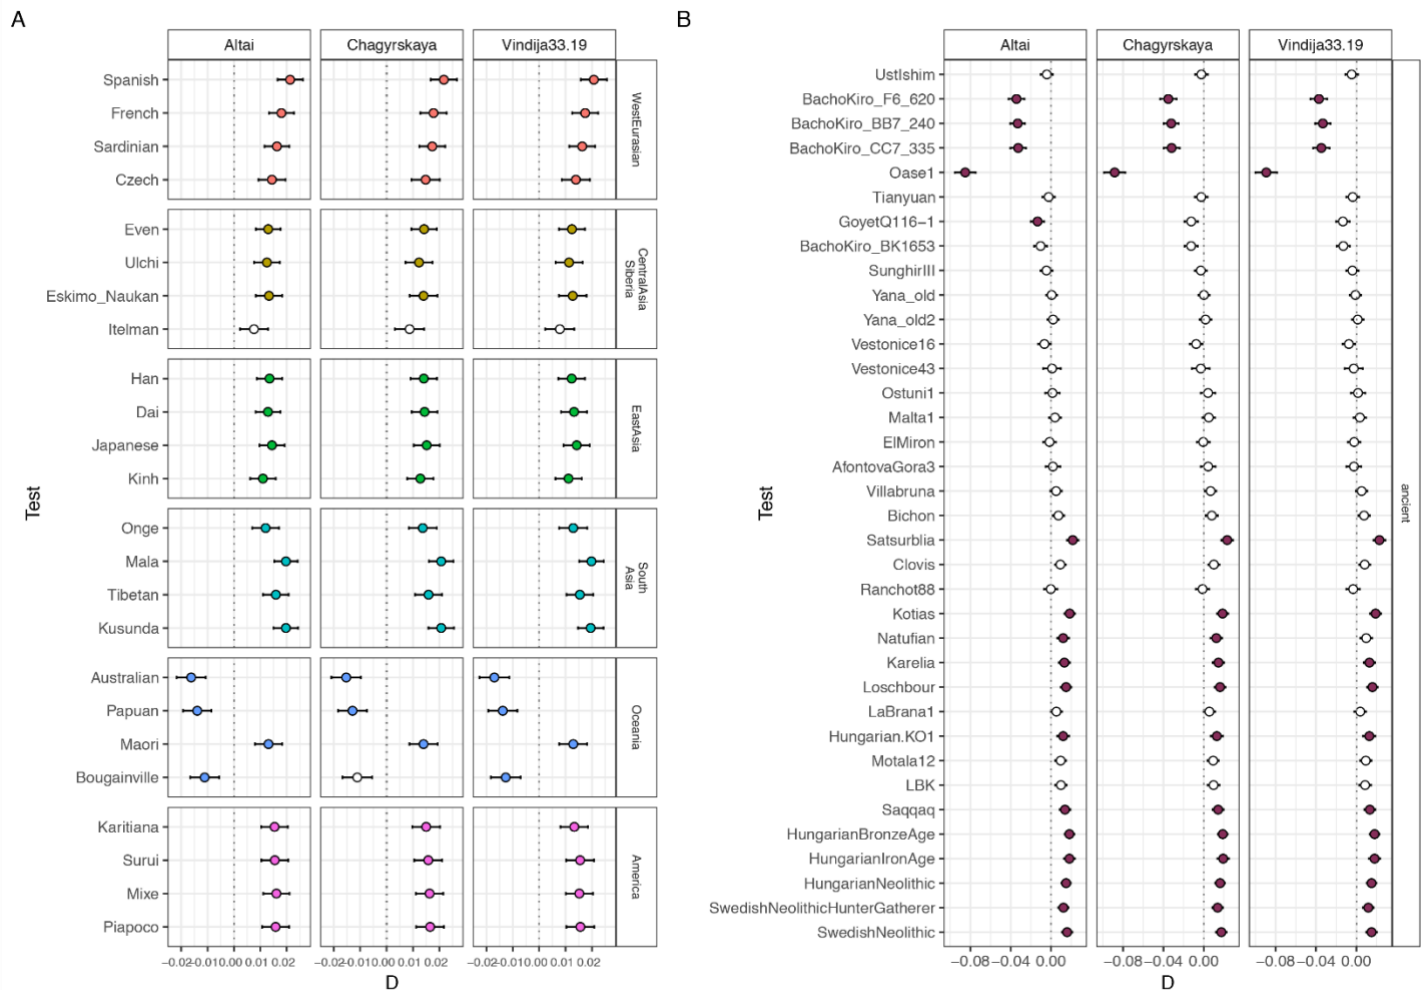

1568 **Figure S7.7 D-statistics comparing derived allele sharing with an archaic genome between**  
 1569 **~38,000-year-old *Kostenki14*<sup>19</sup> from Russia and a range of present-day and ancient**  
 1570 **modern humans.** Values for  $D(Kostenki14, Test; Archaic, Mbuti)$  denoted as circles are plotted  
 1571 on the  $x$ -axes where *Archaic* is a high-coverage Neandertal<sup>2,3,11</sup> genome and *Test* is either a  
 1572 present-day population from SGDP<sup>8</sup> (panel A) or an ancient individual (panel B). Three Mbuti  
 1573 individuals from SGDP<sup>8</sup> were used as outgroup.  $D$  statistics were calculated using  
 1574 ADMIXTOOLS<sup>5</sup> as implemented in *admixr*<sup>6</sup>. Filled-in circles indicate a significant  $Z$ -score or  
 1575  $|Z| \geq 3$ , and open circles indicate a non-significant  $Z$ -score or  $|Z| < 3$ . Whiskers on each side of  
 1576 the plotted  $D$  values correspond to one standard error calculated using a Weighted Block  
 1577 Jackknife<sup>5,7</sup> and a block size of 5 Mb across all autosomes on the “2200k” Panel (nsnps  
 1578 (*Kostenki 14*) = 1,676,430).

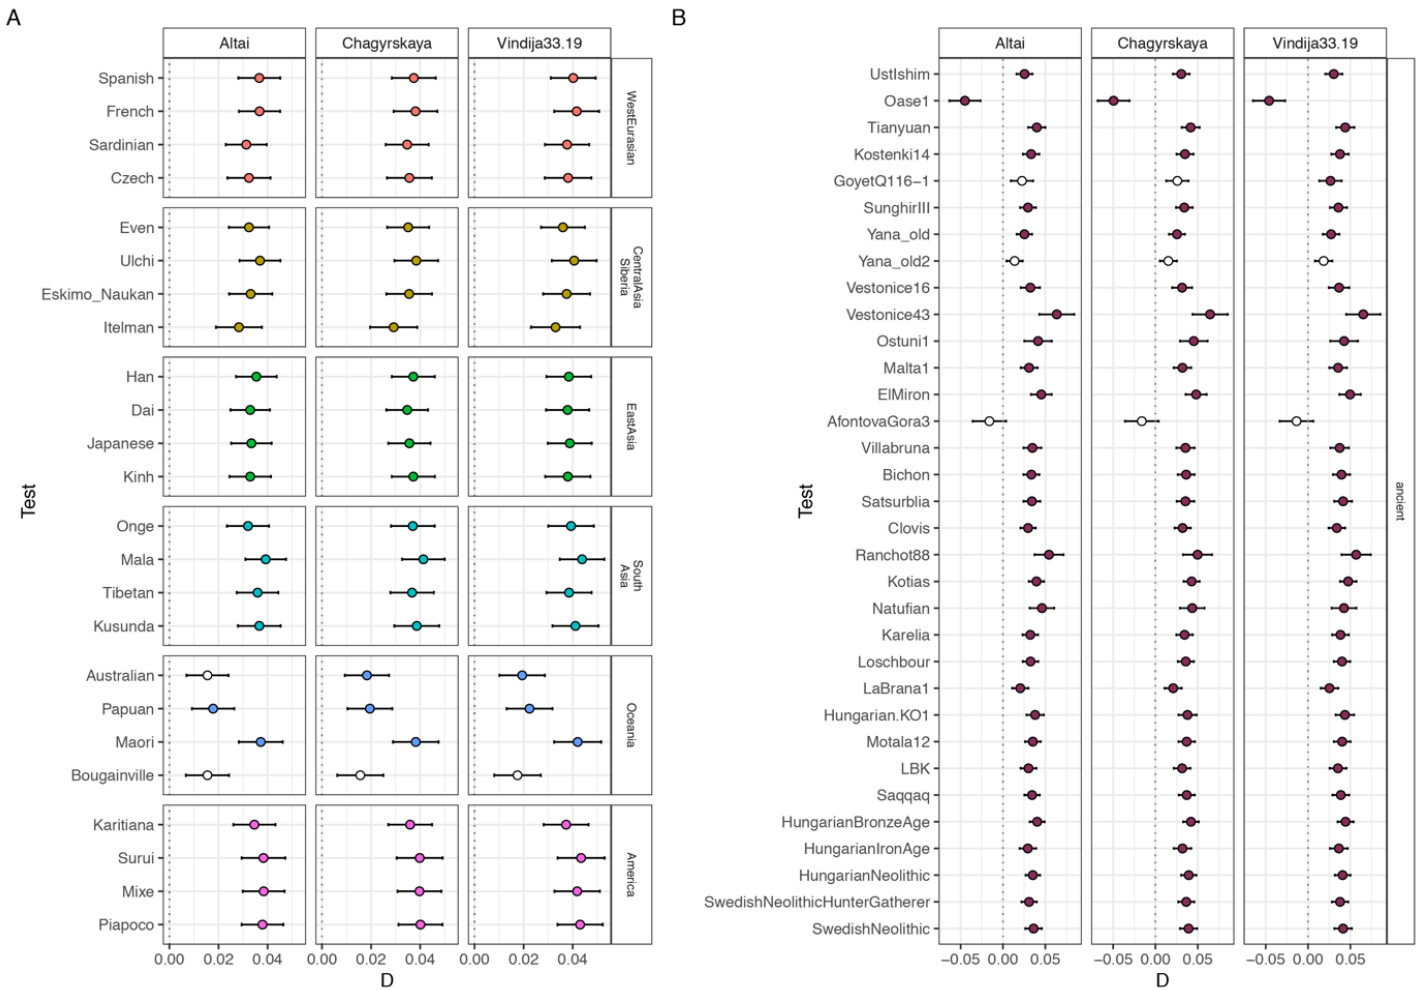

1580 **Figure S7.8 D-statistics comparing derived allele sharing with an archaic genome between**  
 1581 **IUP Bacho Kiro F6-620 and a range of present-day and ancient modern humans.** Values  
 1582 for  $D(\text{Bacho Kiro F6-620}, \text{Test}; \text{Archaic}, \text{Chimpanzee})$  denoted as circles are plotted on the x-  
 1583 axes where *Archaic* is a high-coverage Neandertal<sup>2,3,11</sup> genome and *Test* is either a present-day  
 1584 population from SGDP<sup>8</sup> (panel A) or an ancient individual (panel B). These analyses are  
 1585 restricted to transversion polymorphisms to mitigate the effect of ancient DNA damage. The  
 1586 genome of *panTro2* was used as an outgroup.  $D$  statistics were calculated using  
 1587 ADMIXTOOLS<sup>5</sup> as implemented in *admixr*<sup>6</sup>. Filled-in circles indicate a significant Z-score or  
 1588  $|Z| \geq 3$ , and open circles indicate a non-significant Z-score or  $|Z| < 3$ . Whiskers on each side of  
 1589 the plotted  $D$  values correspond to one standard error calculated using a Weighted Block  
 1590 Jackknife<sup>5,7</sup> and a block size of 5 Mb across all autosomes on the “2200k” Panel (nsnps (*Bacho*  
 1591 *Kiro F6-620*) = 922,946).

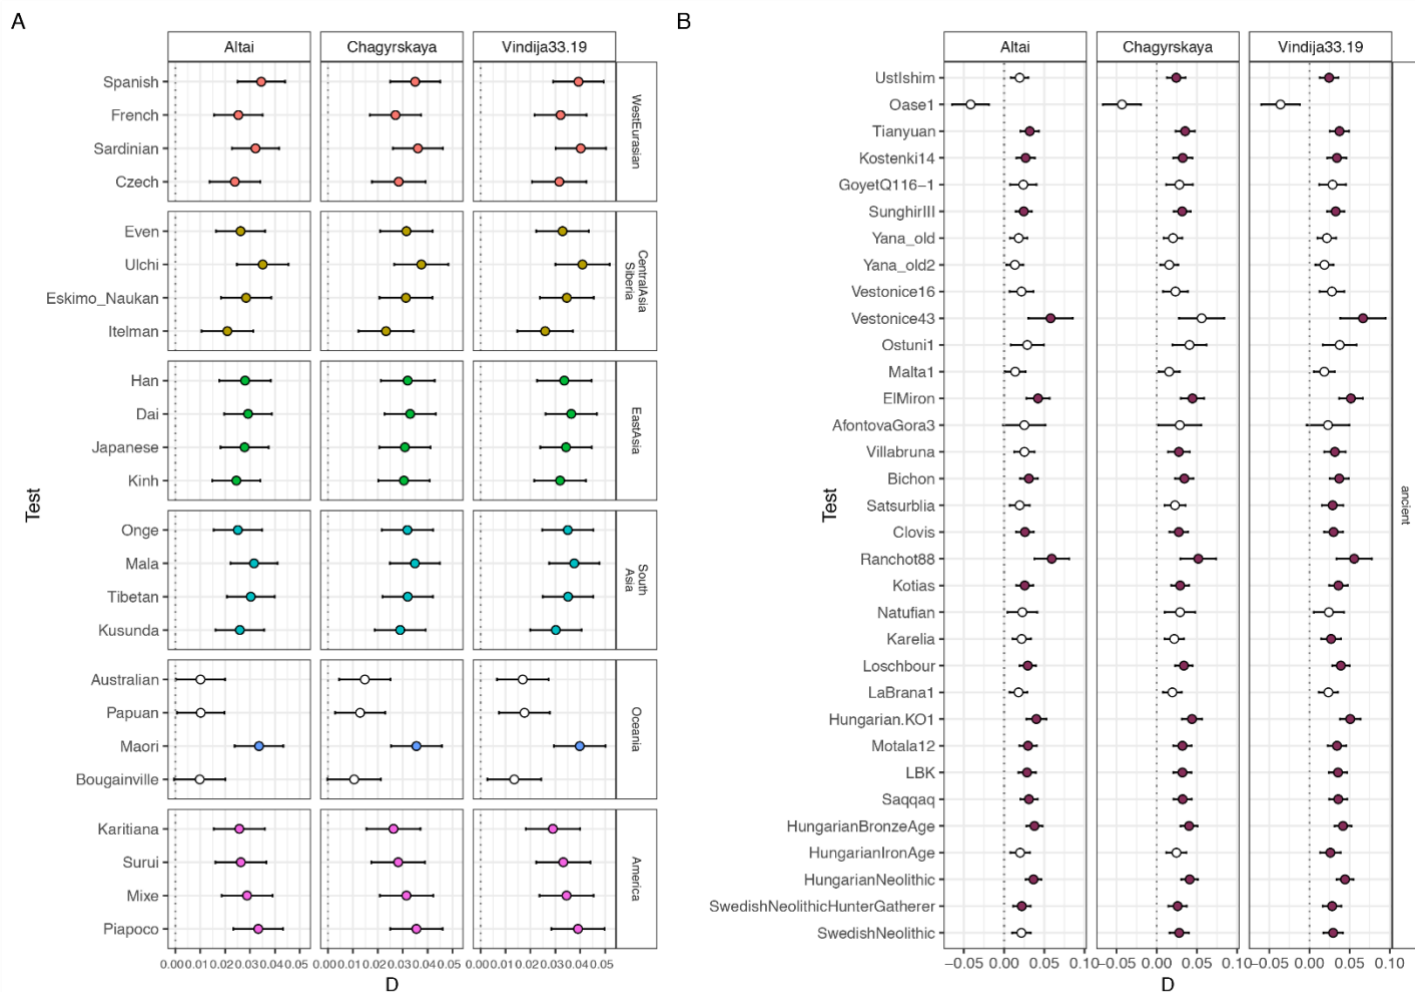

1593 **Figure S7.9 D-statistics comparing derived allele sharing with an archaic genome between**  
 1594 **IUP Bacho Kiro CC7-335 and a range of present-day and ancient modern humans.** Values  
 1595 for  $D(\text{Bacho Kiro CC7-335}, \text{Test}; \text{Archaic}, \text{Chimpanzee})$  denoted as circles are plotted on the  
 1596  $x$ -axes where *Archaic* is a high-coverage Neandertal<sup>2,3,11</sup> genome and *Test* is either a present-  
 1597 day population from SGDP<sup>8</sup> (panel A) or an ancient individual (panel B). These analyses are  
 1598 restricted to transversion polymorphisms to mitigate the effect of ancient DNA damage. The  
 1599 genome of *panTro2* was used as an outgroup.  $D$  statistics were calculated using  
 1600 ADMIXTOOLS<sup>5</sup> as implemented in *admixr*<sup>6</sup>. Filled-in circles indicate a significant Z-score or  
 1601  $|Z| \geq 3$ , and open circles indicate a non-significant Z-score or  $|Z| < 3$ . Whiskers on each side of  
 1602 the plotted  $D$  values correspond to one standard error calculated using a Weighted Block  
 1603 Jackknife<sup>5,7</sup> and a block size of 5 Mb across all autosomes on the “2200k” Panel (nsnps (*Bacho*  
 1604 *Kiro CC7-335*) = 340,010).

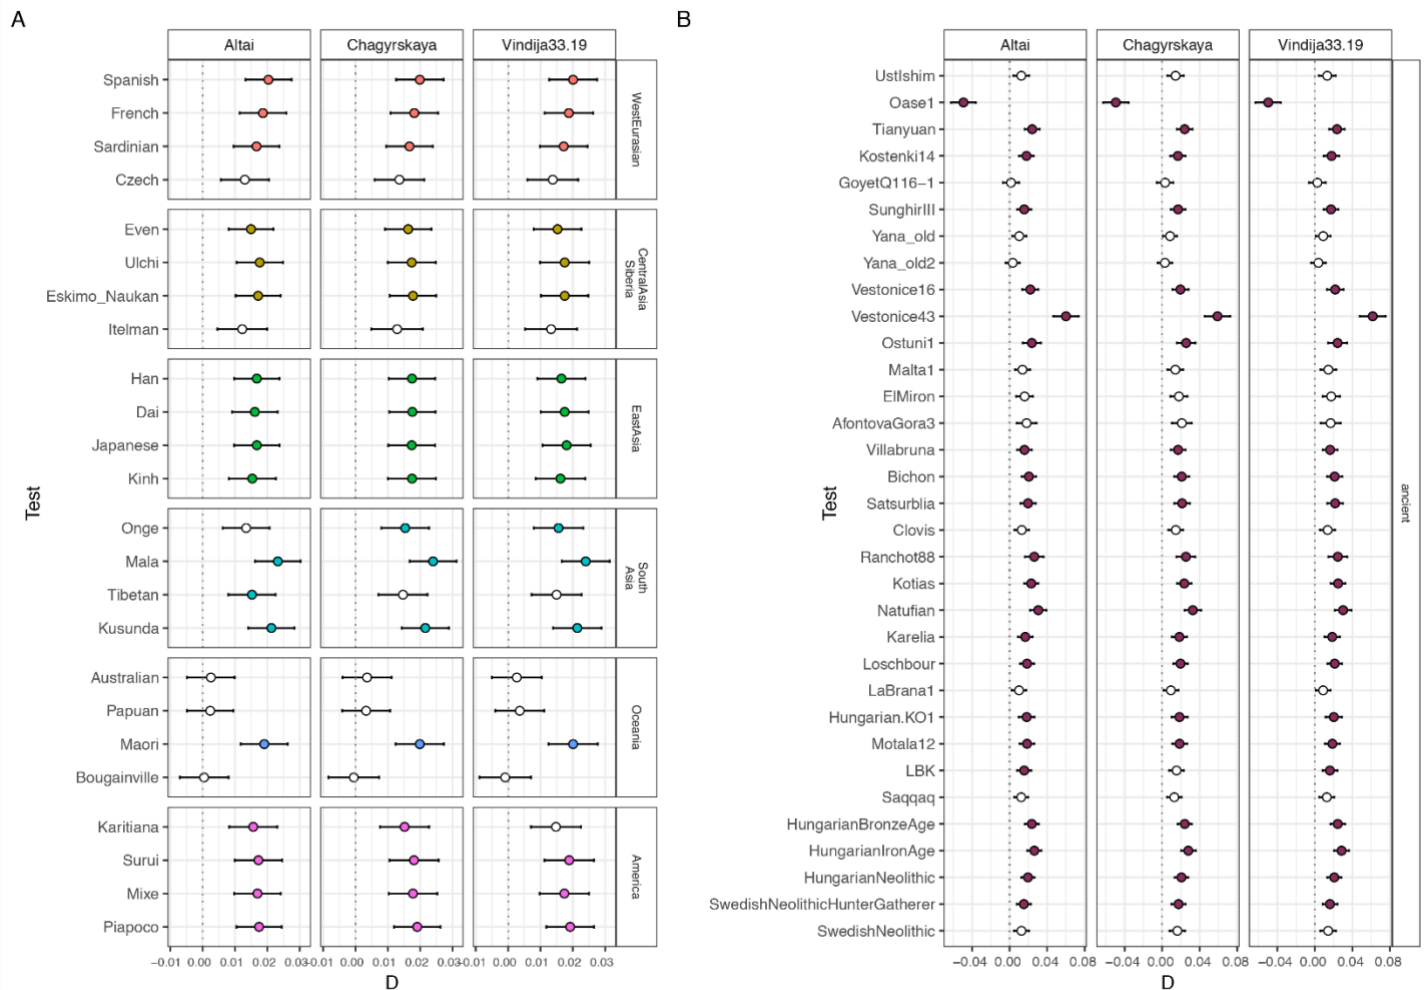

1606 **Figure S7.10 D-statistics comparing derived allele sharing with an archaic genome**  
 1607 **between IUP Bacho Kiro BB7-240 and a range of present-day and ancient modern**  
 1608 **humans.** Values for  $D(\text{Bacho Kiro BB7-240}, \text{Test}; \text{Archaic}, \text{Chimpanzee})$  denoted as circles  
 1609 are plotted on the  $x$ -axes where *Archaic* is a high-coverage Neandertal<sup>2,3,11</sup> genome and *Test* is  
 1610 either a present-day population from SGDP<sup>8</sup> (panel A) or an ancient individual (panel B). These  
 1611 analyses are restricted to transversion polymorphisms to mitigate the effect of ancient DNA  
 1612 damage. The genome of *panTro2* was used as an outgroup.  $D$  statistics were calculated using  
 1613 ADMIXTOOLS<sup>5</sup> as implemented in *admixr*<sup>6</sup>. Filled-in circles indicate a significant Z-score or  
 1614  $|Z| \geq 3$ , and open circles indicate a non-significant Z-score or  $|Z| < 3$ . Whiskers on each side of  
 1615 the plotted  $D$  values correspond to one standard error calculated using a Weighted Block  
 1616 Jackknife<sup>5,7</sup> and a block size of 5 Mb across all autosomes on the “2200k” Panel (nsnps (*Bacho*  
 1617 *Kiro BB7-240*) = 362,545).

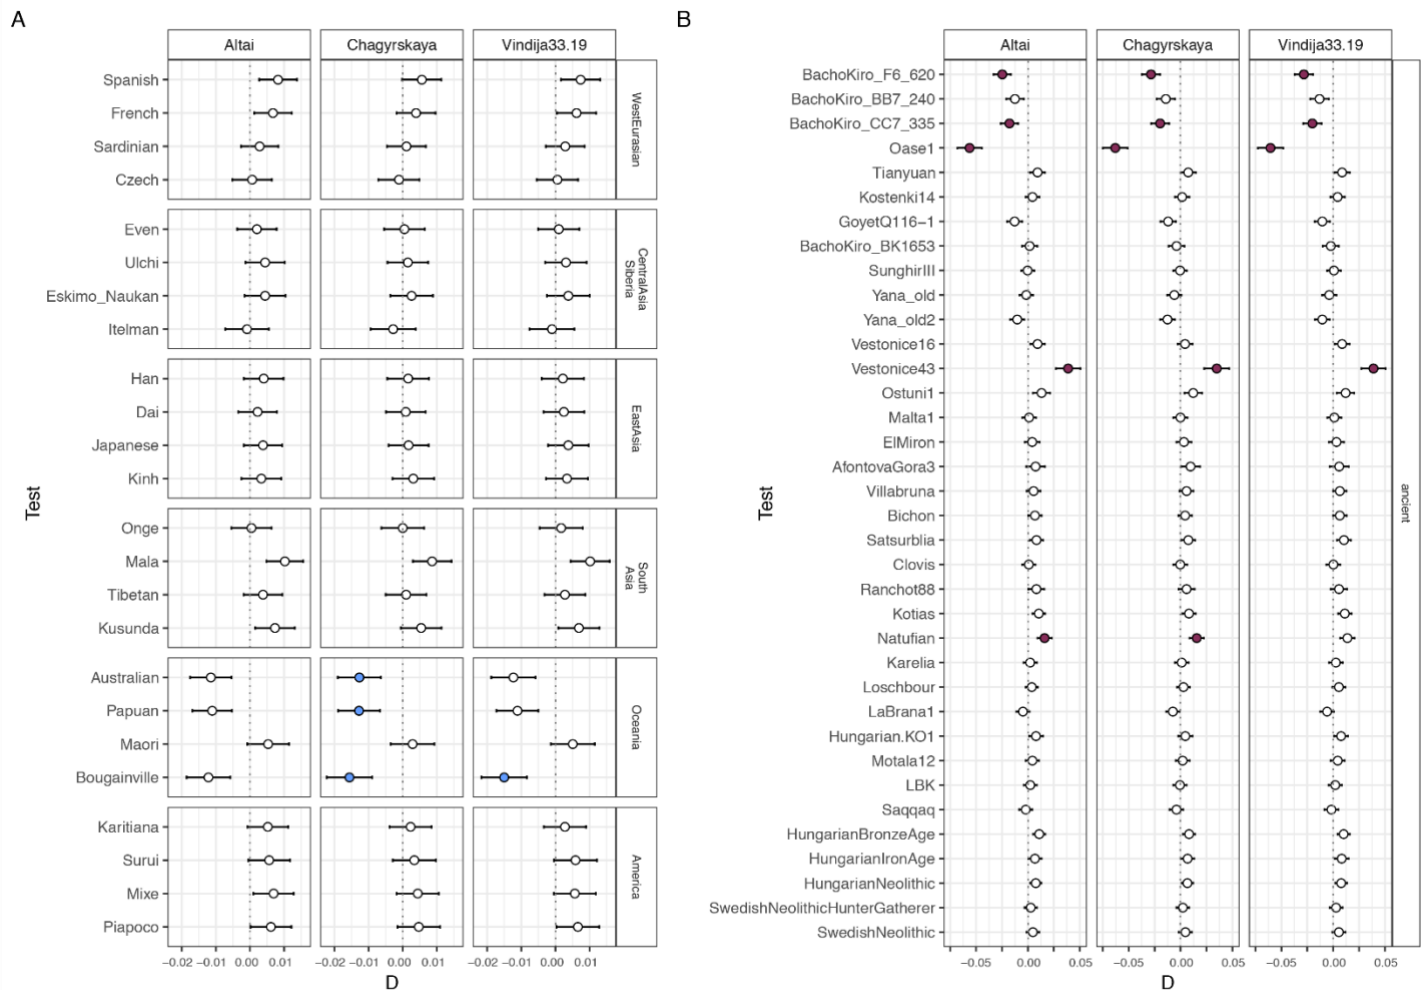

1619 **Figure S7.11 D-statistics comparing derived allele sharing with an archaic genome**  
 1620 **between ~45,000-year-old *Ust'Ishim* from Siberia and a range of present-day and ancient**  
 1621 **modern humans.** Values for  $D(Ust'Ishim, Test; Archaic, Chimpanzee)$  denoted as circles are  
 1622 plotted on the  $x$ -axes where *Archaic* is a high-coverage Neandertal<sup>2,3,11</sup> genome and *Test* is  
 1623 either a present-day population from SGDP<sup>8</sup> (panel A) or an ancient individual (panel B). These  
 1624 analyses are restricted to transversion polymorphisms to mitigate the effect of ancient DNA  
 1625 damage. The genome of *panTro2* was used as an outgroup.  $D$  statistics were calculated using  
 1626 ADMIXTOOLS<sup>5</sup> as implemented in *admixr*<sup>6</sup>. Filled-in circles indicate a significant Z-score or  
 1627  $|Z| \geq 3$ , and open circles indicate a non-significant Z-score or  $|Z| < 3$ . Whiskers on each side of  
 1628 the plotted  $D$  values correspond to one standard error calculated using a Weighted Block  
 1629 Jackknife<sup>5,7</sup> and a block size of 5 Mb across all autosomes on the “2200k” Panel (nsnps  
 1630 (*Ust'Ishim*) = 1,095,471).

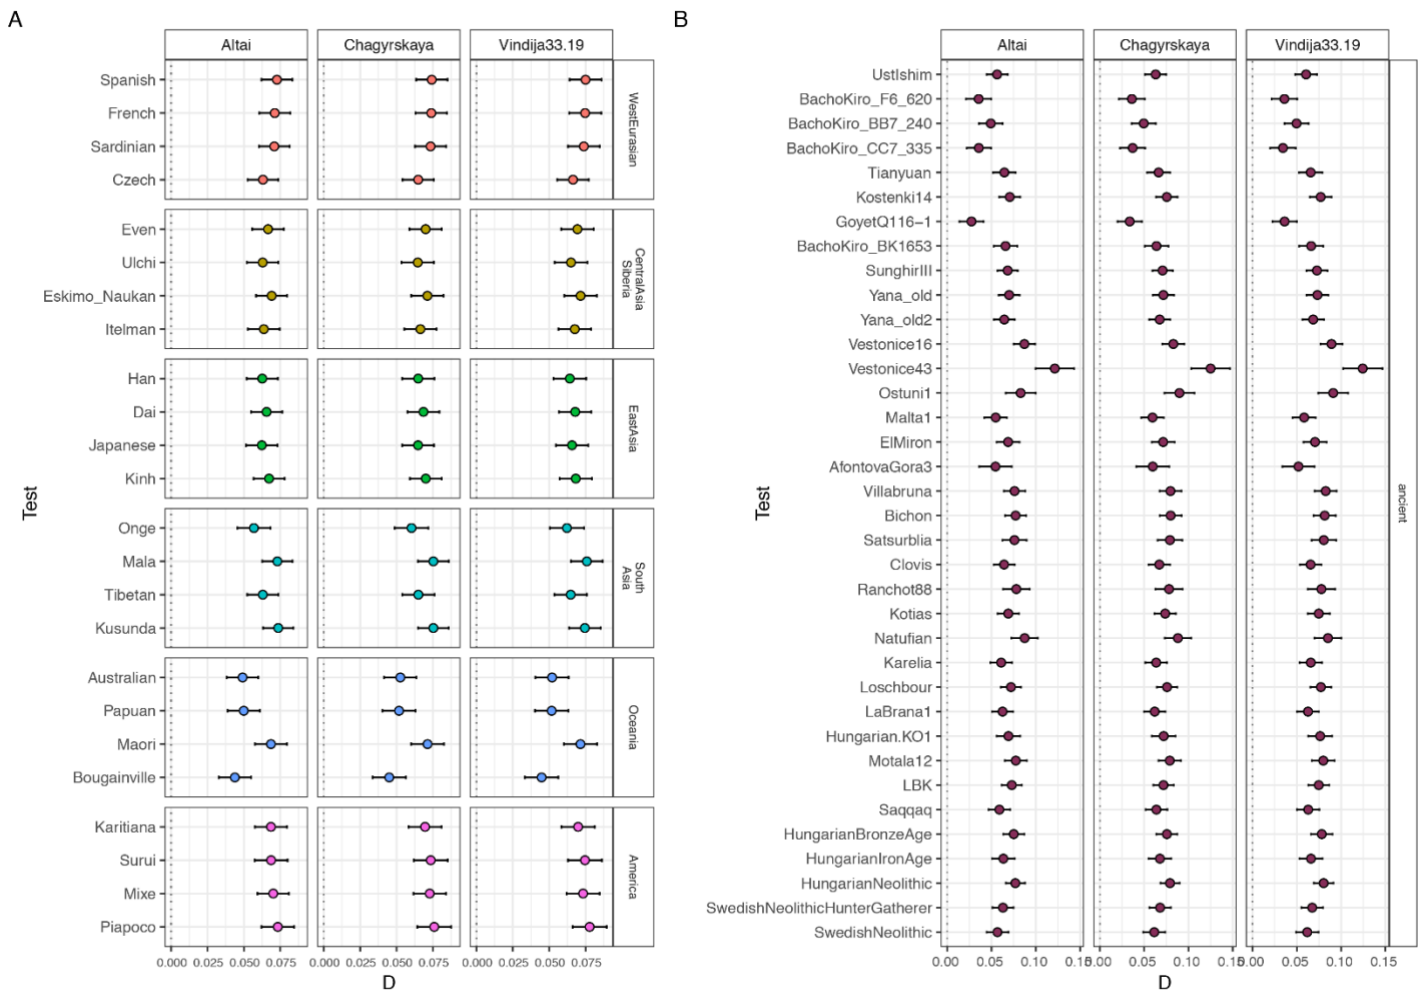

1632 **Figure S7.12 D-statistics comparing derived allele sharing with an archaic genome**  
 1633 **between *Oase1* and a range of present-day and ancient modern humans.** Values for  
 1634  $D(Oase1, Test; Archaic, Chimpanzee)$  denoted as circles are plotted on the  $x$ -axes where  
 1635 *Archaic* is a high-coverage Neandertal<sup>2,3,11</sup> genome and *Test* is either a present-day population  
 1636 from SGDP<sup>8</sup> (panel A) or an ancient individual (panel B). These analyses are restricted to  
 1637 transversion polymorphisms to mitigate the effect of ancient DNA damage. The genome of  
 1638 *panTro2* was used as an outgroup.  $D$  statistics were calculated using ADMIXTOOLS<sup>5</sup> as  
 1639 implemented in *admixr*<sup>6</sup>. Filled-in circles indicate a significant Z-score or  $|Z| \geq 3$ , and open  
 1640 circles indicate a non-significant Z-score or  $|Z| < 3$ . Whiskers on each side of the plotted  $D$   
 1641 values correspond to one standard error calculated using a Weighted Block Jackknife<sup>5,7</sup> and a  
 1642 block size of 5 Mb across all autosomes on the “2200k” Panel (nsnps (*Oase 1*) = 180,040).

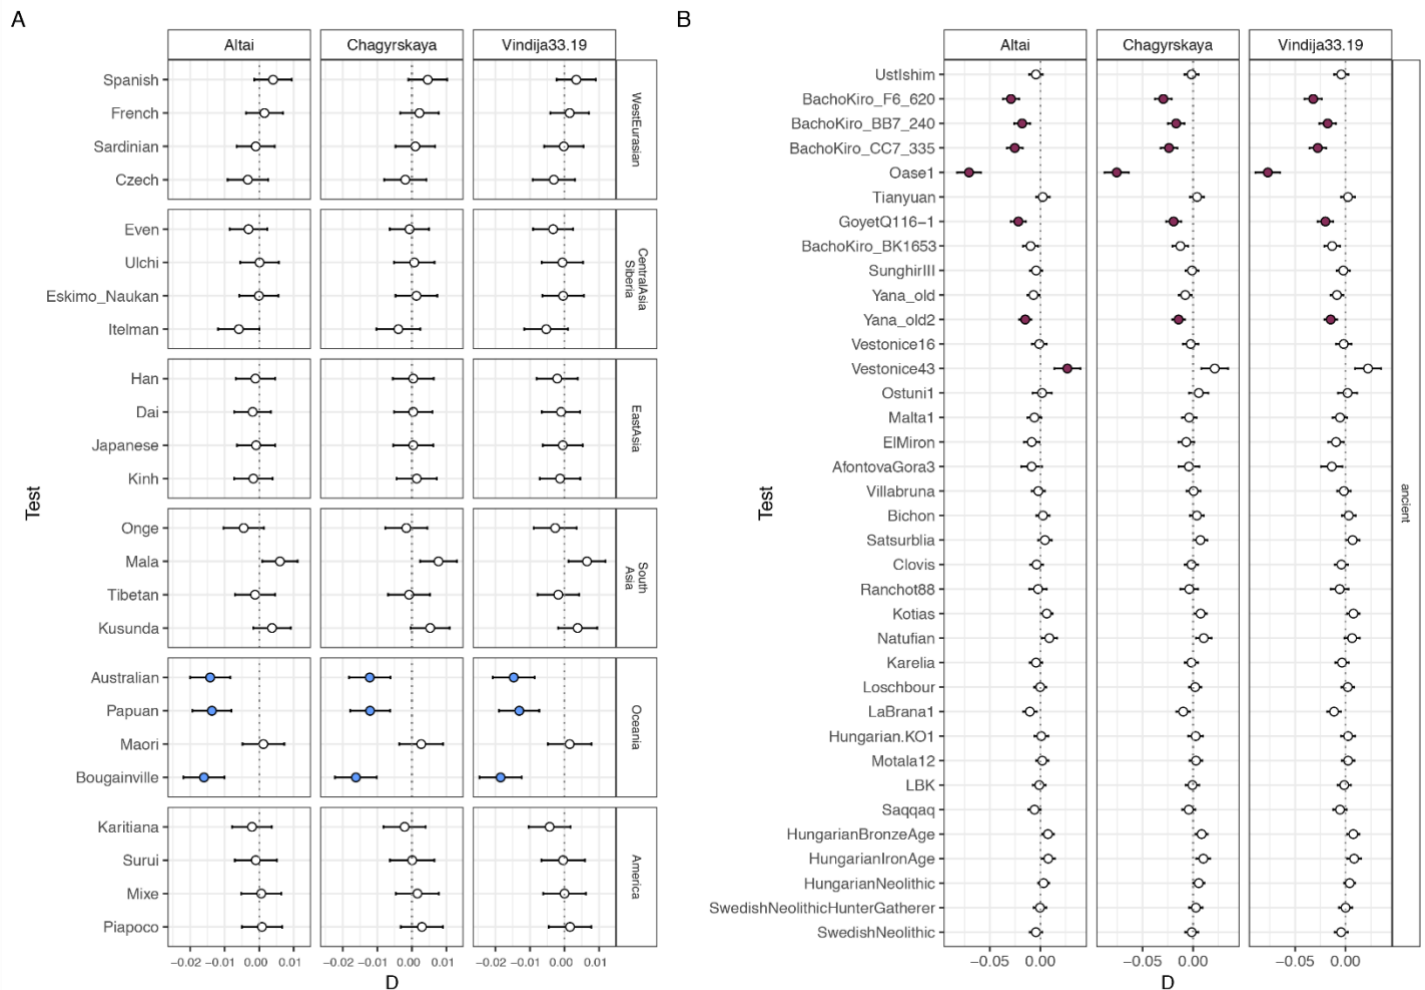

1644 **Figure S7.13 D-statistics comparing derived allele sharing with an archaic genome**  
 1645 **between ~38,000-year-old *Kostenki14*<sup>19</sup> from Russia and a range of present-day and**  
 1646 **ancient modern humans.** Values for  $D(Kostenki14, Test; Archaic, Chimpanzee)$  denoted as  
 1647 circles are plotted on the  $x$ -axes where *Archaic* is a high-coverage Neandertal<sup>2,3,11</sup> genome and  
 1648 *Test* is either a present-day population from SGDP<sup>8</sup> (panel A) or an ancient individual (panel  
 1649 B). These analyses are restricted to transversion polymorphisms to mitigate the effect of ancient  
 1650 DNA damage. The genome of *panTro2* was used as an outgroup.  $D$  statistics were calculated  
 1651 using ADMIXTOOLS<sup>5</sup> as implemented in *admixr*<sup>6</sup>. Filled-in circles indicate a significant  $Z$ -  
 1652 score or  $|Z| \geq 3$ , and open circles indicate a non-significant  $Z$ -score or  $|Z| < 3$ . Whiskers on each  
 1653 side of the plotted  $D$  values correspond to one standard error calculated using a Weighted Block  
 1654 Jackknife<sup>5,7</sup> and a block size of 5 Mb across all autosomes on the “2200k” Panel (nsnps  
 1655 (*Kostenki 14*) = 814,133).

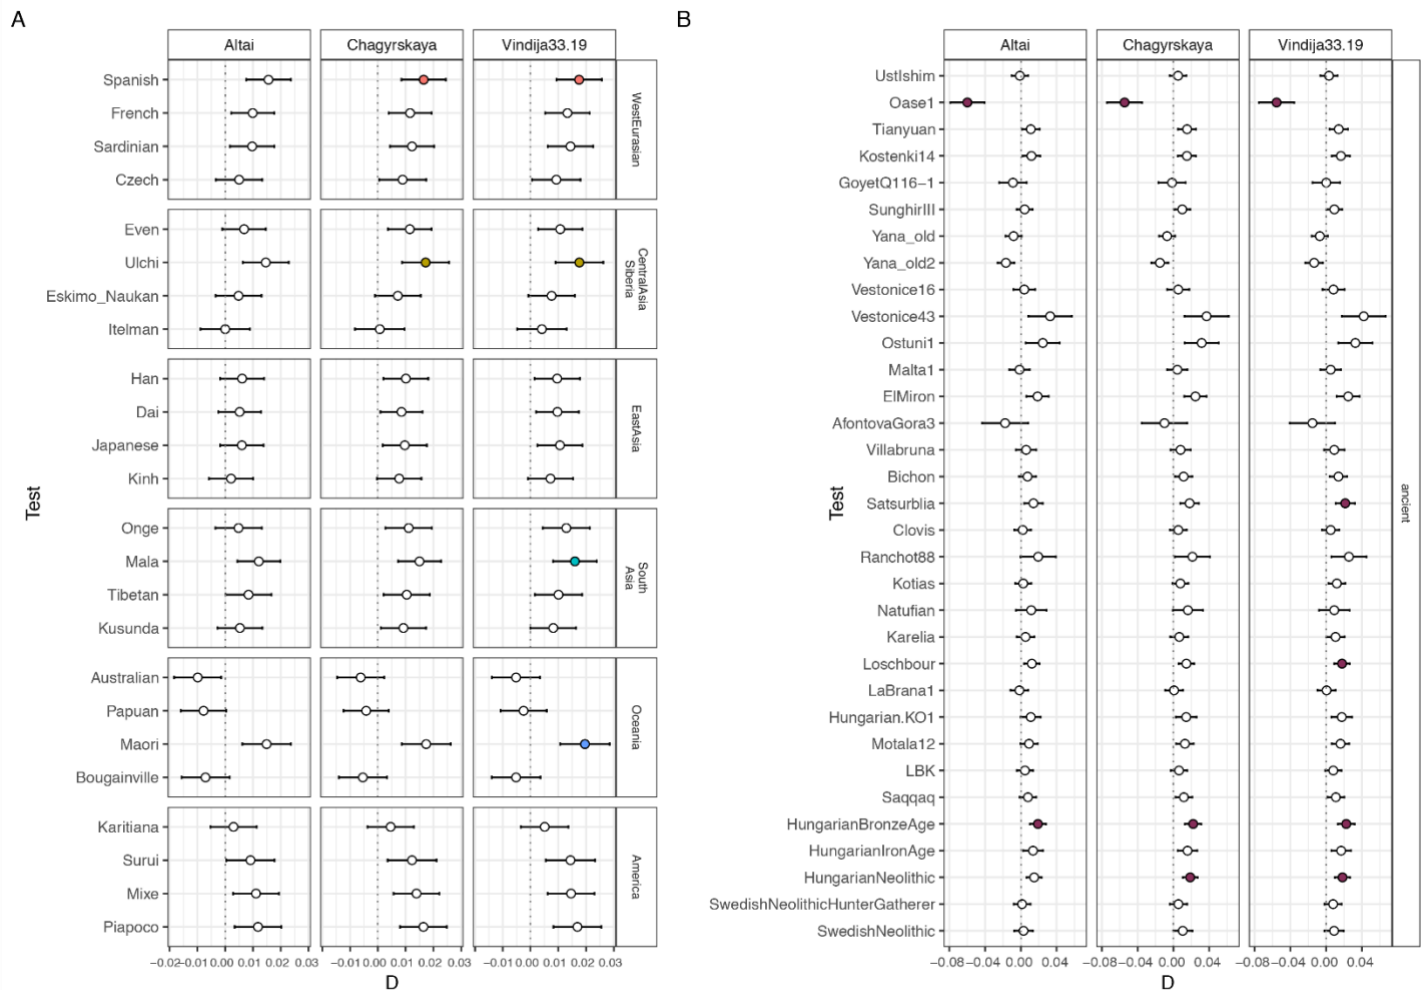

1657 **Figure S7.14 D-statistics comparing derived allele sharing with an archaic genome**  
 1658 **between Bacho Kiro BK1653 and a range of present-day and ancient modern humans.**  
 1659 Values for  $D(\text{Bacho Kiro BK1653}, \text{Test}; \text{Archaic}, \text{Chimpanzee})$  denoted as circles are plotted  
 1660 on the  $x$ -axes where *Archaic* is a high-coverage Neandertal<sup>2,3,11</sup> genome and *Test* is either a  
 1661 present-day population from SGDP<sup>8</sup> (panel A) or an ancient individual (panel B). These  
 1662 analyses are restricted to transversion polymorphisms to mitigate the effect of ancient DNA  
 1663 damage. The genome of *panTro2* was used as an outgroup.  $D$  statistics were calculated using  
 1664 ADMIXTOOLS<sup>5</sup> as implemented in *admixr*<sup>6</sup>. Filled-in circles indicate a significant Z-score or  
 1665  $|Z| \geq 3$ , and open circles indicate a non-significant Z-score or  $|Z| < 3$ . Whiskers on each side of  
 1666 the plotted  $D$  values correspond to one standard error calculated using a Weighted Block  
 1667 Jackknife<sup>5,7</sup> and a block size of 5 Mb across all autosomes on the “2200k” Panel (nsnps (*Bacho*  
 1668 *Kiro BK1653*) = 382,191).



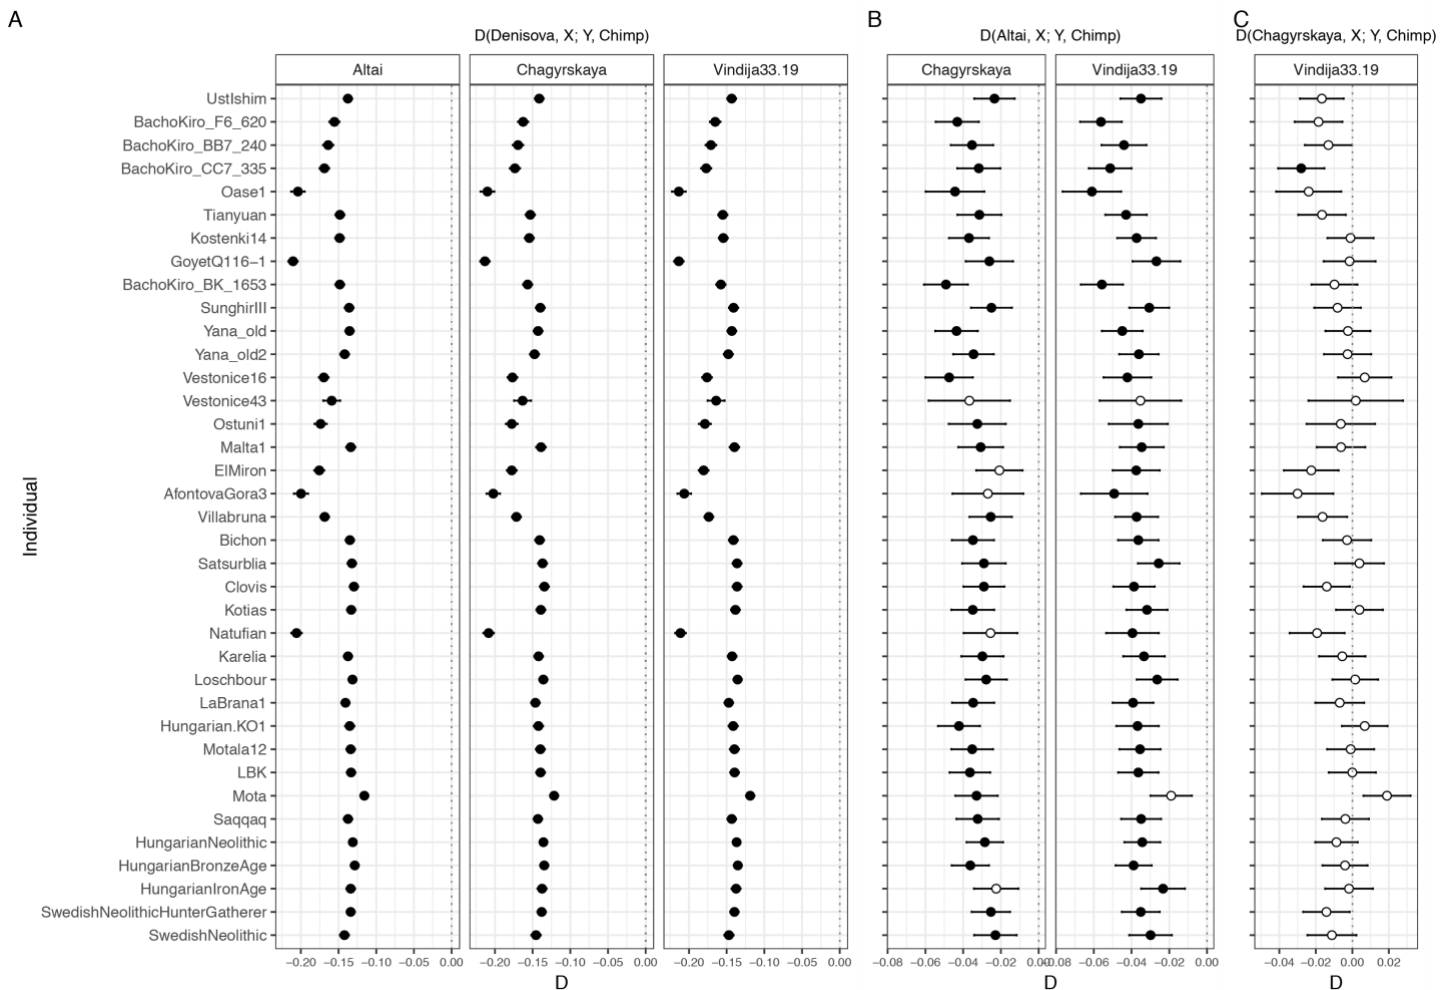

1670 **Figure S7.15 Proximity to the introgressing archaic population in ancient humans**  
 1671 **calculated as  $D(\text{Archaic}_1, \text{Archaic}_2; \text{ancient human}, \text{Chimp})$ .** A) All ancient modern humans  
 1672 are significantly closer to Neandertals<sup>2,3,11</sup> than to *Denisova3*,  $D(\text{Denisova3}, \text{Neandertal};$   
 1673 *ancient human}, \text{Chimp}), B) introgressing Neandertals are significantly closer to *Chagyrskaya*  
 1674 *8* and *Vindija 33.19* than to the *Altai* Neandertal in most ancient modern humans,  $D(\text{Altai}$   
 1675 *Neandertal}, \text{Neandertal}\_2; \text{ancient human}, \text{Chimp}), C) no significant difference in the  
 1676 introgressing Neandertal proximity to *Chagyrskaya 8* and *Vindija 33.19*,  $D(\text{Chagyrskaya 8},$   
 1677 *Vindija 33.19}; \text{ancient human}, \text{Chimp}).  $D$  values denoted as circles plotted on the  $x$ -axes were  
 1678 calculated using ADMIXTOOLS<sup>5</sup> as implemented in *admixr*<sup>6</sup>. The genome of *panTro2* was  
 1679 used as an outgroup. Filled-in circles indicate a significant Z-score or  $|Z| \geq 3$ , and open circles  
 1680 indicate a non-significant Z-score or  $|Z| < 3$ . Whiskers on each side of the plotted  $D$  values  
 1681 correspond to one standard error calculated using a Weighted Block Jackknife<sup>5,7</sup> and a block  
 1682 size of 5 Mb across all autosomes on the “2200k” Panel (nsnps = 2,056,573).***

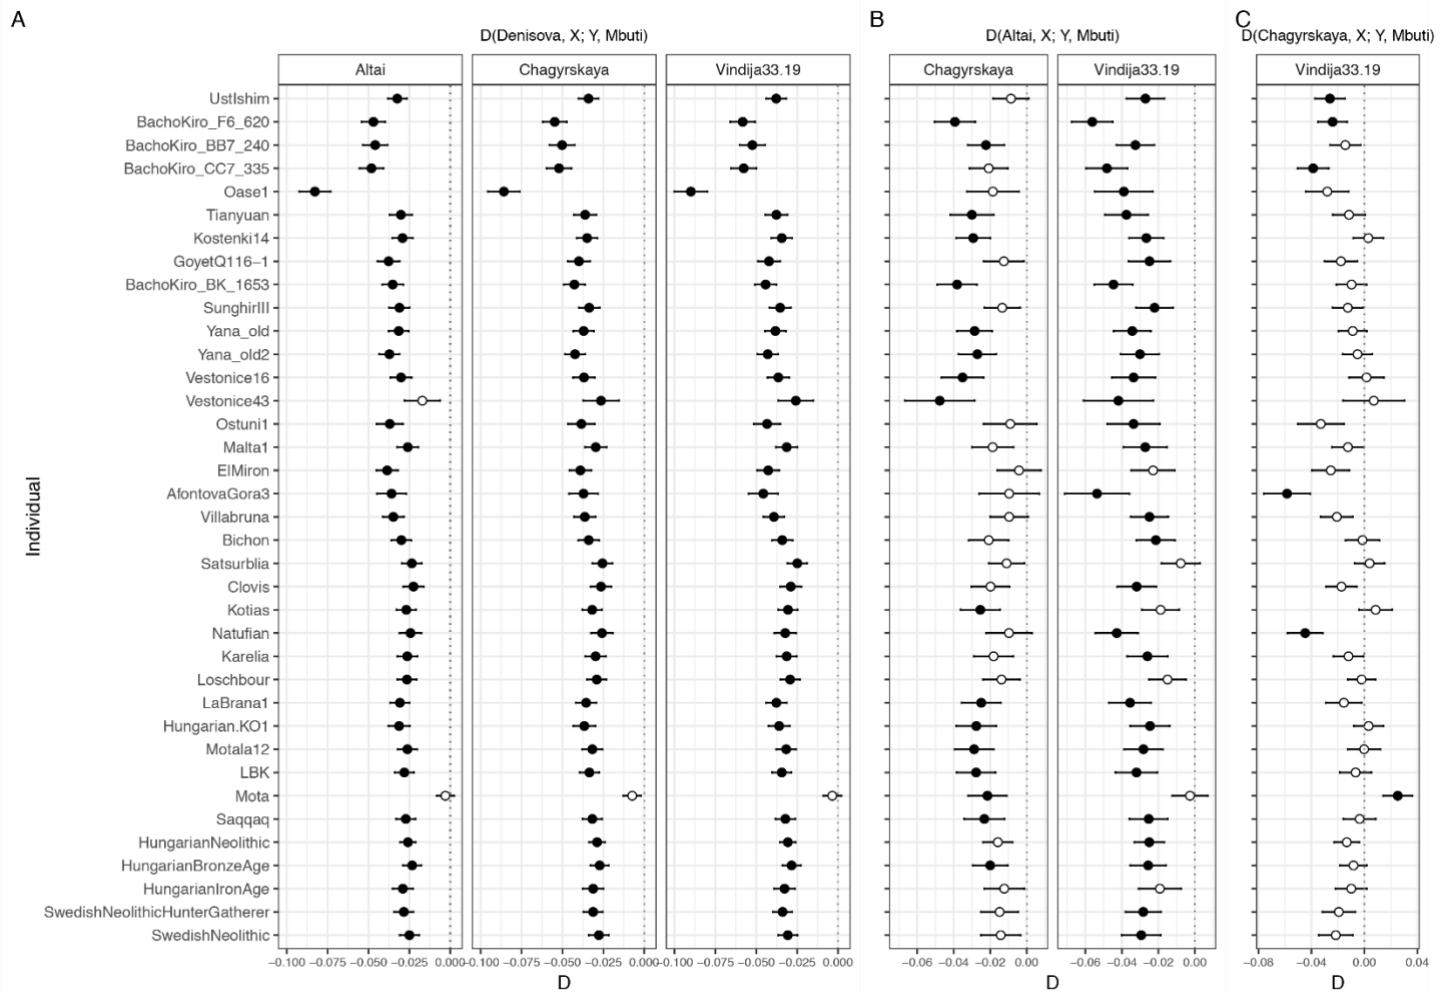

1684 **Figure S7.16 Proximity to the introgressing archaic population in ancient humans**  
 1685 **calculated as  $D(\text{Archaic}_1, \text{Archaic}_2; \text{ancient human}, \text{Mbuti})$ .** A) All ancient modern humans  
 1686 are significantly closer to Neandertals than to *Denisova3*<sup>18</sup>,  $D(\text{Denisova3}, \text{Neandertal}; \text{ancient}$   
 1687  $\text{human}, \text{Mbuti})$ , B) introgressing Neandertals are significantly closer to *Chagyrskaya* <sup>811</sup> and  
 1688 *Vindija 33.19*<sup>3</sup> than to the *Altai* Neandertal<sup>2</sup> in most ancient modern humans,  $D(\text{Altai}$   
 1689  $\text{Neandertal}, \text{Neandertal}_2; \text{ancient human}, \text{Mbuti})$ , C) no significant difference in the  
 1690 introgressing Neandertal proximity to *Chagyrskaya* <sup>811</sup> and *Vindija 33.19*<sup>3</sup> for most ancient  
 1691 modern humans,  $D(\text{Chagyrskaya } 8, \text{Vindija } 33.19; \text{ancient human}, \text{Mbuti})$ . *D* values denoted  
 1692 as circles plotted on the *x*-axes were calculated using ADMIXTOOLS<sup>5</sup> as implemented in  
 1693 *admixr*<sup>6</sup>. Genomes of three Mbuti individuals from SGDP<sup>8</sup> are used as an outgroup. Filled-in  
 1694 circles indicate a significant Z-score or  $|Z| \geq 3$ , and open circles indicate a non-significant Z-  
 1695 score or  $|Z| < 3$ . Whiskers on each side of the plotted *D* values correspond to one standard error  
 1696 calculated using a Weighted Block Jackknife<sup>5,7</sup> and a block size of 5 Mb across all autosomes  
 1697 on the “2200k” Panel (nsnps = 2,056,573).

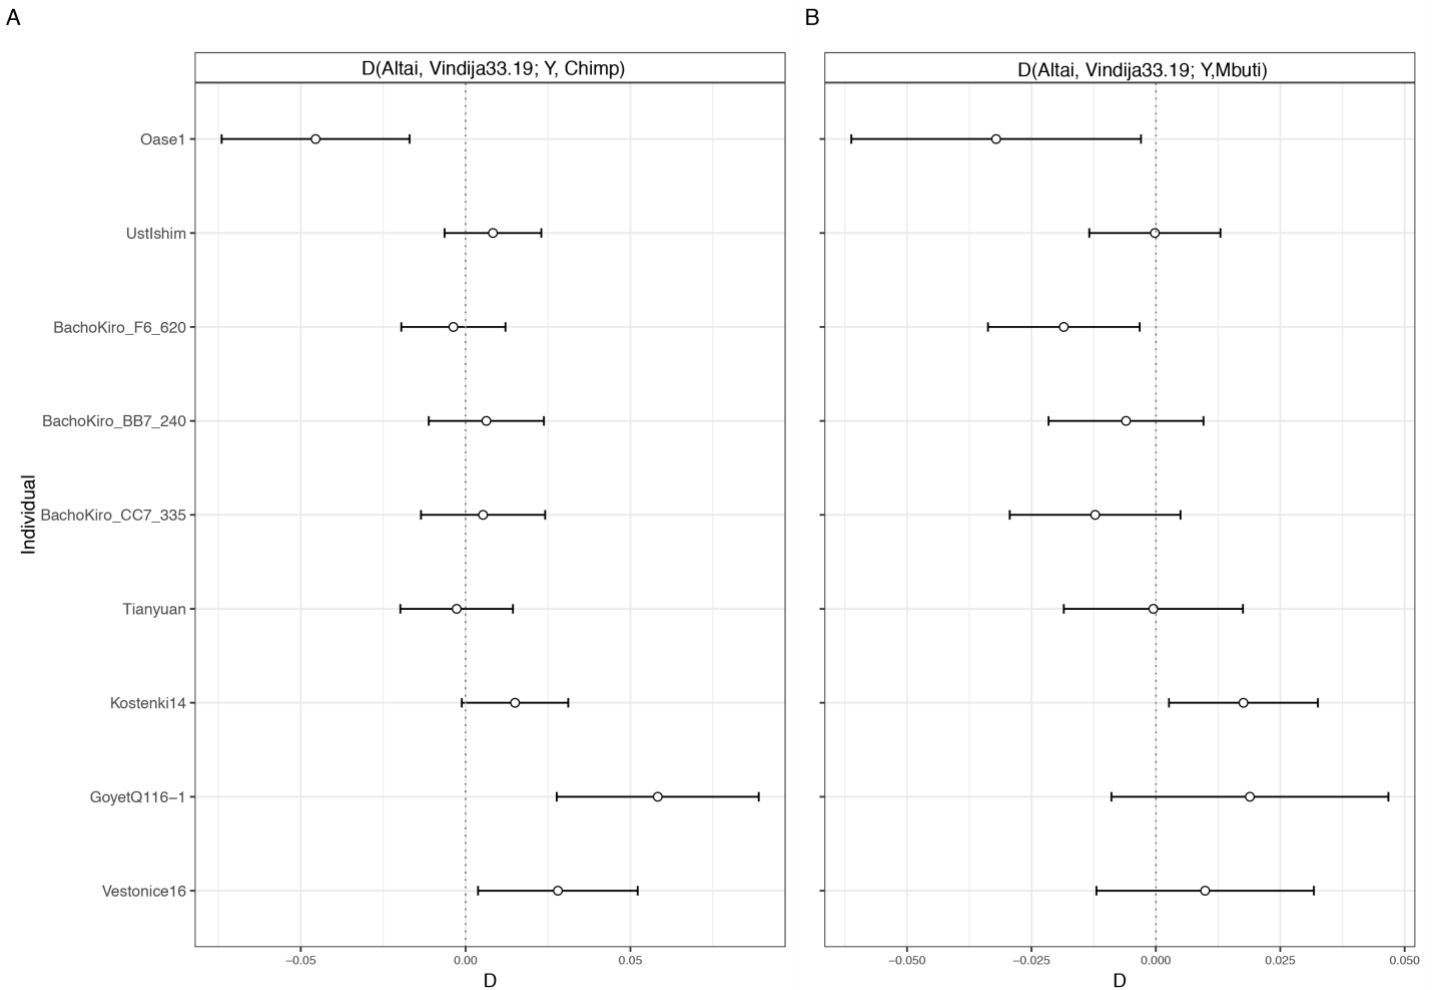

1699 **Figure S7.17 The effect of down-sampling high-coverage genomes of the *Altai Neandertal*<sup>2</sup>**  
 1700 **and *Vindija 33.19*<sup>3</sup> on  $D(\text{Altai Neandertal, Vindija 33.19; ancient human, Outgroup})$ .** Down-  
 1701 sampling high-coverage Neandertal genomes to the same coverage as in late Neandertals<sup>17</sup>  
 1702 (number of SNPs reported in the Tab. S7.1) on “2200k” Panel and restricting the analyses to  
 1703 transversion polymorphisms causes the statistics that are otherwise significant (see Fig. S7.15  
 1704 and S7.16) to become not significantly different from 0.  $D$  values denoted as circles plotted on  
 1705 the  $x$ -axes were calculated using ADMIXTOOLS<sup>5</sup> as implemented in *admixr*<sup>6</sup>. Genomes of  
 1706 *panTro2* (panel A) and three Mbuti individuals from SGDP<sup>8</sup> (panel B) are used as outgroups.  
 1707 Open circles indicate a non-significant Z-score or  $|Z| < 3$ . Whiskers on each side of the plotted  
 1708  $D$  values correspond to one standard error computed with a Weighted Block Jackknife<sup>5,7</sup> and a  
 1709 block size of 5 Mb across all autosomes on the “2200k” Panel.

## 1710 **Supplementary Information 8**

### 1711 **Neandertal introgressed segments in Bacho Kiro individuals and dating of** 1712 **Neandertal admixture**

1713

### 1714 **Distribution of Neandertal introgressed tracks in the genomes of Bacho Kiro and other** 1715 **ancient modern humans**

1716 We used *admixfrog*<sup>1</sup> (version 0.5.6, <https://github.com/BenjaminPeter/admixfrog/>) for  
1717 detecting archaic introgressed segments in the genomes of Bacho Kiro Cave individuals, as  
1718 well as in 32 ancient modern humans<sup>2-12</sup> and 254 present-day non-Africans from the Simons  
1719 Genome Diversity Project (SGDP)<sup>13</sup> as a direct comparison. *Admixfrog* allows the reliable  
1720 detection of introgressed segments in low-coverage ancient genomes even in the presence of  
1721 substantial levels of present-day human DNA contamination<sup>1</sup>. In short, *admixfrog* models each  
1722 individual (*Target*) as a mixture of at least two different *Sources*. As potential *Sources* we used  
1723 three high-coverage Neandertal genomes<sup>14-16</sup> (abbreviated as NEA), the high-coverage  
1724 *Denisova 3* genome<sup>17</sup> (abbreviated as DEN) and 44 genomes of present-day Sub-Saharan  
1725 Africans from SGDP<sup>13</sup> (abbreviated as AFR). We used the genome of a chimpanzee (*panTro4*,  
1726 abbreviated as PAN) to infer the ancestral state at each position in the “Archaic admixture”  
1727 panel.

1728 We used BAM files of 21 ancient modern humans<sup>2-4</sup>, including six Bacho Kiro Cave specimens  
1729 and *Oase 1*, that were enriched for ~1.7 million SNPs informative of Neandertal and Denisovan  
1730 ancestry (“Archaic admixture”<sup>3</sup> panel, Supplementary Information 3). All BAM files were  
1731 filtered as described in Supplementary Information 2. Briefly, all files were aligned to the  
1732 human reference genome containing the decoy sequences  
1733 (GRCh37/1000 Genomes release) and we used *samtools*<sup>18</sup> to filter for fragments equal or longer  
1734 than 35 base pairs (bp) that had a mapping quality of 25 or greater (MQ $\geq$ 25). We also used 16  
1735 ancient modern humans from different points in time and different geographical regions for  
1736 which whole-genome shotgun data are available<sup>5-12</sup> as a comparison. Their respective BAM  
1737 files were intersected with ~1.7 million SNPs of the “Archaic admixture” panel using  
1738 *BEDTools*<sup>19</sup> (version: 2.24.0) after alignment to the GRCh37 and filtering for fragments of at  
1739 least 35 bp with a mapping quality of at least 25. For *GoyetQ116-1*, we did not have “Archaic  
1740 admixture” panel data and we therefore used “2200k” SNP Panel for inferring Neandertal  
1741 introgressed segments in this individual.

1742 For each ancient modern human (*Target*) we generated input files directly from the  
1743 respective BAM files using the following command:

1744

```
1745 admixfrog-bam --bamfile {individual}.bam --out {individual}.in.xz --  
1746 ref {ref_archaicadmixture.csv.xz}
```

1747

1748 To further identify archaic introgressed segments in a genome of a given *Target*, we  
1749 run:

1750

```
1751 admixfrog --infile {individual}.in.xz --ref  
1752 {ref_archaicadmixture.csv.xz} --out {out_individual} --states AFR NEA  
1753 DEN --cont-id AFR --ll-tol 0.01 --bin-size 5000 --est-F --est-tau  
1754 --freq-F 3 --freq-contamination 3 --e0 0.01 --ancestral PAN --run-  
1755 penalty 0.4 --max-iter 250 --n-post-replicates 200 --filter-pos 50 --  
1756 filter-map 0 -{female/male}
```

1757

1758 where --states AFR NEA DEN correspond to potential *Sources*, --cont-id AFR is a potential  
1759 contaminant and --ancestral PAN indicates that *panTro4* is used to infer a putative ancestral  
1760 allele. The window size (--bin-size) is set to 5,000 base pairs (bp) for all individuals except  
1761 Bacho Kiro *CC7-2289*, where a window size is increased to 100,000 bp due to the sparse  
1762 coverage of informative sites for this individual (a total of 19,703 SNPs covered by at least one  
1763 fragment, see Supplementary Information 2, Tab. S2.6). The African American genetic map<sup>20</sup>  
1764 (build hg19) was used for re-scaling physical distances (in base pairs) into genetic distances (in  
1765 centimorgans [cM]). For all downstream analyses we only consider archaic fragments longer  
1766 than 0.2 cM in ancient modern humans, as these can be confidently inferred with high  
1767 accuracy using *admixfrog*<sup>1</sup>.

1768

1769 With the additional data produced in this study we identify a total of 496.56 cM of  
1770 Neandertal segments in *Oase1*, with ten segments longer than five cM and three of them longer  
1771 than 50 cM (Fig. 3 and Extended Data Fig. 8A). Interestingly, we also identify large stretches  
1772 of Neandertal ancestry across autosomes of IUP Bacho Kiro *F6-620*, *AA7-738*, *CC7-335*, *BB7-*  
1773 *240* and *CC7-2289* (Fig. 3, Extended Data Fig. 8A, Fig. S8.1), *i.e.* all Initial Upper Palaeolithic  
1774 specimens from Bacho Kiro Cave. In total, we detect 279.59 cM of Neandertal introgressed  
1775 segments in *F6-620*, 251.63 cM in *CC7-335* and 220.86 cM in *BB7-240*, with seven, six and  
1776 nine of those segments longer than five cM (Tab. S8.1). The longest introgressed segment of  
1777 Neandertal ancestry in *F6-620* is located on chromosome 5 (chr5:5,207,757-53,693,820) and  
has a recombination length of 54.26 cM (48.49 Mb). The inferred Neandertal introgressed

1778 segment boundaries in *F6-620* and *AA7-738* are nearly identical (Fig. 3, Extended Data Fig.  
1779 8A, Fig. S8.1A), which is not expected even for the first-degree relatives, thus further  
1780 supporting our conclusion based on the pairwise mismatch rate (see Supplementary Information  
1781 4) that these two specimens originate from the same individual.

1782 The longest Neandertal segments that we identify are 25.61 cM on chromosome 19  
1783 (chr19:41,743,126-53,982,102) in *CC7-335* and 17.42 cM on chromosome 20  
1784 (chr20:39,121,854-49,228,176) in *BB7-240*. We also detect three Neandertal segments longer  
1785 than 6 cM in Bacho Kiro *CC7-2289* on chromosomes 12 (chr12:71,475,600-80,845,047 and  
1786 chr12:89,691,728-97,676,702) and chromosome 9 (chr9:110,903,519-115,770,224), albeit with  
1787 lower confidence in the boundaries of the introgressed segments due to the limited amount of  
1788 data for this individual (Fig. S8.1B). As a comparison, using *admixfrog* we identify 143.42 cM  
1789 of Neandertal segments in a ~45,000-year-old *Ust'Ishim* from Siberia, with the longest  
1790 segments of 6.12 cM and 5.92 cM on chromosomes 13 (chr13: 22,719,662-24,676,454) and 21  
1791 (chr21:31,552,179-35,448,101), respectively (Extended Data Fig. 7).

1792 Neandertal ancestry is distributed in smaller segments across the genome of the  
1793 ~34,000-year-old Bacho Kiro *BK1653*, with the longest segment of 2.49 cM on chromosome 6  
1794 (chr6:37,721,776- 40,410,185), an average segment length of 0.49 cM, and a total of 121.74  
1795 cM of Neandertal ancestry (Fig. 3). These numbers are similar to other Upper Palaeolithic  
1796 modern humans, such as the ~38,000-year-old *Kostenki14* from Russia with an average  
1797 segment length of 0.59 cM and a total of 118.62 cM of Neandertal introgressed segments, and  
1798 the ~35,000-year-old *Goyet Q116-1* from Belgium with an average segment length of 0.51 cM  
1799 and a total of 134.18 cM of Neandertal introgressed segments. Fig. 3 and the Extended Data  
1800 Fig. 7 show the physical distribution of the inferred Neandertal introgressed segments across  
1801 all autosomes in IUP Bacho Kiro individuals, *Ust'Ishim*, *Oase1*, *Tianyuan*, *Kostenki 14*, *Goyet*  
1802 *Q116-1* and Bacho Kiro *BK1653*.

1803

#### 1804 **Neandertal introgressed segments on the X chromosome**

1805 Since the “Archaic admixture” panel does not contain SNPs of the sex chromosomes, we  
1806 investigated 55,248 SNPs on the X chromosome from the “2200k” Panel for inferring the  
1807 distribution of Neandertal introgressed segments on the X chromosome in Bacho Kiro Cave  
1808 individuals, *Oase1*, and other ancient modern humans for which we have both panels available.  
1809 We created the input files for *admixfrog* directly from BAM files as detailed above, with the  
1810 difference of using `--ref ref_A3700k.csv.xz`.

1811 Interestingly, we identify two long segments of Neandertal ancestry on the X  
1812 chromosome of *Oase 1*, with the recombination length of 4.00 cM (chrX:12,535,839-  
1813 13,850,789) and 7.37 cM (chrX:30,969,935-32,771,678) (Extended Data Fig. 8A). We also  
1814 detect one Neandertal segment of ~2 cM on each of the X chromosomes of *F6-620*, *CC7-335*  
1815 and *BB7-240* (Extended Data Fig. 8A).

1816

### 1817 **Dating of the Neandertal admixture**

1818 In order to estimate the timing of the most recent Neandertal introgression in the Bacho Kiro  
1819 individuals, we applied three different methods to the Neandertal fragments identified with  
1820 *admixfrog*<sup>1</sup>. For all methods we calculate the genetic length of the tracts using the African-  
1821 American recombination map<sup>20</sup> and we compare the estimates with those obtained for *Oase1*<sup>2</sup>.

1822 First, we calculated the likelihood of the observed Neandertal tract lengths under the  
1823 assumption of an exponential decay of fragment length due to recombination, with rate of decay  
1824 *recombination rate x number of generations since introgression*. In order to isolate fragments  
1825 of recent origin and specific to Bacho Kiro Cave individuals from those introgressed in modern  
1826 humans and common to all out-of-Africa human populations, we considered only fragments  
1827 longer than 10cM, for which the probability of having introgressed more recently than 50  
1828 generations prior is 96% assuming an exponential decay. Uncertainty, represented in Extended  
1829 Data Fig. 8B as 96% confidence intervals, is estimated assuming an asymptotic gaussian  
1830 approximation of the likelihood function. Our point estimates indicate that most Bacho Kiro  
1831 Cave individuals had Neandertal ancestors ~7 generations before they lived. Only the *F6-620*  
1832 shows a lower point estimate, 5 generations, however the confidence intervals overlap. The  
1833 point estimate for *Oase1* is 4 generations, with uncertainty between 4 and 10 generations,  
1834 comparably to what was estimated previously<sup>2</sup>. Note that three tracts identified previously in  
1835 *Oase 1*<sup>2</sup> are estimated by *admixfrog* to be composed of different fragments, possibly explaining  
1836 the slightly higher point estimate. Despite this, our estimates of timing of introgressions are  
1837 comparable to those of Fu *et al.*<sup>2</sup>.

1838 We then modelled the lengths of the fragments as a mixture of two exponential  
1839 distributions. Specifically, we co-estimated the number of generations since a more recent and  
1840 an older introgression, as well as the proportion *p* of the fragments > 0.1cM originating from  
1841 the more recent introgression event. For all genomes we performed a likelihood ratio test  
1842 (degrees of freedom=2) comparing the likelihood of a simple exponential model with only one  
1843 introgression event, and the model with two events. In Figure S8.2 we show the proportion of  
1844 fragments originating from the different introgression events for different genetic lengths. We

1845 find support for two introgression events for both *Oase 1* and several Bacho Kiro Cave  
1846 specimens (S8.5). Estimates for models with one or two introgression events are reported in  
1847 Tab. S8.1.

1848 We then fitted the complementary cumulative distribution (CCD) of the lengths of  
1849 Neandertal tracts, i.e. the proportion of tracts with length equal or higher than a given length  
1850  $X$ , as in Fu *et al.*<sup>2</sup>. Briefly, because of the exponential relationship between timing of  
1851 introgression and length of the introgressed tracts, the logarithm of the cumulative distribution  
1852 of tract length is expected to depend linearly on the tract length, i.e.  $\ln(\text{CCD}) \sim -(n - 1) \times$   
1853  $\text{tract\_length}$ . We thus fitted the slope of this relationship separating introgressed tracts in older  
1854 ( $\leq 5\text{cM}$ ) and more recent ( $>5\text{cM}$ ). The threshold of 5cM (96% of a tract to be introgressed  $<100$   
1855 generations earlier), that is lower than 10cM used for the previous method, is used here to obtain  
1856 enough data points to estimate accurately the slope. Fig. S8.3 shows both the slopes for older  
1857 and more recent fragments, while the estimated values and uncertainties are shown in Tab. S8.2.  
1858 For all genomes, except for the *F6-620* and *Oase 1*, the point estimates appear as slightly older,  
1859 although the confidence intervals overlap. Therefore, consistent with our maximum likelihood  
1860 estimates we infer that the *F6-620*, like *Oase 1*, had a Neandertal ancestor less than 6  
1861 generations before he lived.

1862 Finally, we co-estimated the number of generations since introgression and the  
1863 proportion of Neandertal admixture into the ancestors of the Bacho Kiro Cave individuals via  
1864 simulations, using a similar approach used in Fu *et al.*<sup>2</sup>. Specifically, we computed full genome  
1865 simulations of introgressing events contributing on average to 0.01-12.5% of the genome, and  
1866 occurring 3 to 250 generations before the Bacho Kiro Cave individuals lived, in addition to an  
1867 earlier introgression occurring 350 generations earlier ( $\sim 10,000$  years assuming a generation  
1868 time of 29 years). For each of 10,000 simulations for each parameter combination, we  
1869 calculated the mean of the longest 2, 5 or 10 Neandertal tracts, obtaining an expected  
1870 distribution of average length of the longest Neandertal tracts. Then, for each sample, we  
1871 compared the observed values with this distribution. In Fig. S8.5 we show combinations of  
1872 parameters for which the observed means fall between the 5% and the 95% of the simulations  
1873 (coloured squares). Combinations of parameters for which the observed values fall out of this  
1874 expected distribution are marked in grey. Proportions of admixtures corresponding to the  
1875 introgression of a single Neandertal ancestor are marked as black dots for each number of  
1876 generations. We can see that while estimates are consistent with the other two methods  
1877 assuming a single recent Neandertal ancestors (5-10 generations for all individuals), a higher  
1878 proportion of Neandertal admixture – hence more recent Neandertal ancestors than a single one



1879 – would better explain the average length of the longest fragments for a number of generations  
1880 higher than ~8, for all Bacho-Kiro genomes (Fig.S8.5 and S8.6).

1881

1882 **References SI8:**

1883 1 Peter, B. M. 100,000 years of gene flow between Neandertals and Denisovans in the  
1884 Altai mountains. *bioRxiv* (2020).

1885 2 Fu, Q. *et al.* An early modern human from Romania with a recent Neanderthal ancestor.  
1886 *Nature* **524**, 216-219, doi:10.1038/nature14558 (2015).

1887 3 Fu, Q. *et al.* The genetic history of Ice Age Europe. *Nature* **534**, 200-205,  
1888 doi:10.1038/nature17993 (2016).

1889 4 Yang, M. A. *et al.* 40,000-Year-Old Individual from Asia Provides Insight into Early  
1890 Population Structure in Eurasia. *Curr. Biol.* **27**, 3202-3208.e9, doi:  
1891 10.1016/j.cub.2017.09.030 (2017).

1892 5 Fu, Q. *et al.* Genome sequence of a 45,000-year-old modern human from western  
1893 Siberia. *Nature* **514**, 445-449, doi:10.1038/nature13810 (2014).

1894 6 Sikora, M. *et al.* Ancient genomes show social and reproductive behavior of early Upper  
1895 Paleolithic foragers. *Science* **358**, 659-662, doi: 10.1126/science.aao1807 (2017).

1896 7 Sikora, M. *et al.* The population history of northeastern Siberia since the Pleistocene.  
1897 *Nature* **570**, 182-188, doi: 10.1038/s41586-019-1279-z (2019).

1898 8 Raghavan, M. *et al.* Upper Palaeolithic Siberian genome reveals dual ancestry of Native  
1899 Americans. *Nature* **505**, 87-91, doi:10.1038/nature12736 (2014).

1900 9 Lazaridis, I. *et al.* Ancient human genomes suggest three ancestral populations for  
1901 present-day Europeans. *Nature* **513**, 409-413, doi:10.1038/nature13673 (2014).

1902 10 Olalde, I. *et al.* Derived immune and ancestral pigmentation alleles in a 7,000-year-old  
1903 Mesolithic European. *Nature* **507**, 225-228, doi:10.1038/nature12960 (2014).

1904 11 Gallego Llorente, M. *et al.* Ancient Ethiopian genome reveals extensive Eurasian  
1905 admixture throughout the African continent. *Science* **350**, 820-822,  
1906 doi:10.1126/science.aad2879 (2015).

1907 12 Rasmussen, M. *et al.* The genome of a Late Pleistocene human from a Clovis burial site  
1908 in western Montana. *Nature* **506**, 225-229, doi:10.1038/nature13025 (2014).

1909 13 Mallick, S. *et al.* The Simons Genome Diversity Project: 300 genomes from 142 diverse  
1910 populations. *Nature* **538**, 201-206, doi:10.1038/nature18964 (2016).

1911 14 Prüfer, K. *et al.* The complete genome sequence of a Neanderthal from the Altai  
1912 Mountains. *Nature* **505**, 43-49, doi:10.1038/nature12886 (2014).

1913 15 Prüfer, K. *et al.* A high-coverage Neandertal genome from Vindija Cave in Croatia.  
1914 *Science* **358**, 655-658, doi: 10.1126/science.aao1887 (2017).

1915 16 Mafessoni, F. *et al.* A high-coverage Neandertal genome from Chagyrskaya Cave. *Proc.*  
1916 *Natl. Acad. Sci. U.S.A.* **117**, 15132-15136, doi:10.1073/pnas.2004944117 (2020).

1917 17 Meyer, M. *et al.* A high-coverage genome sequence from an archaic Denisovan  
1918 individual. *Science* **338**, 222-226, doi:10.1126/science.1224344 (2012).

1919 18 Li, H. *et al.* The Sequence Alignment/Map format and SAMtools. *Bioinformatics* **25**,  
1920 2078-2079, doi:10.1093/bioinformatics/btp352 (2009).

1921 19 Quinlan, A. R. & Hall, I. M. BEDTools: a flexible suite of utilities for comparing  
1922 genomic features. *Bioinformatics* **26**, 841-842 (2010).

1923 20 Hinch, A. G. *et al.* The landscape of recombination in African Americans. *Nature* **476**,  
1924 170-175, doi: 10.1038/nature10336 (2011).

1925 **Table S8.1 Estimates of the number of generations before the ancient (*n.anc*) and more**  
1926 **recent (*n.rec*) Neandertal introgression in Bacho Kiro Cave individuals and other ancient**  
1927 **modern humans, and the proportion of Neandertal fragments originating from the most**  
1928 **recent introgression event (*p*).** *p*-values obtained with a likelihood ratio tests comparing an  
1929 exponential model with only one introgression occurred *n.gen1* generations before the birth of  
1930 the individual and that with two events are reported as *LR*, and as *LR Bonferroni* after a multiple  
1931 testing Bonferroni correction for the number of tested specimens (n=22). Specimens for which  
1932 a model with two admixture events is supported (*LR Bonferroni*<0.05) are highlighted in gray and  
1933 an asterisk. Two-tailed 95% asymptotic confidence intervals (+/-*CI*) are calculated from the  
1934 Hessian of the likelihood profile. Confidence intervals for the more recent introgression event  
1935 are not calculated when this is not supported (n.a.).

| Specimen    | n.rec | -CI  | +CI  | n.anc | -CI   | +CI   | p    | -CI  | +CI  | n.gen 1 | LR        | LR Bonferroni |
|-------------|-------|------|------|-------|-------|-------|------|------|------|---------|-----------|---------------|
| BK AA7_738  | 5.1   | 0.7  | 9.5  | 47.5  | 38.8  | 56.2  | 0.04 | 0.00 | 0.09 | 34.63   | 9.83E-09* | 2.16E-07*     |
| BK BB7_240  | 13.0  | 5.0  | 21.1 | 76.5  | 66.9  | 86.2  | 0.05 | 0.01 | 0.08 | 62.73   | 5.20E-07* | 1.14E-05*     |
| BK 1653     | 9.9   | n.a. | n.a. | 201.4 | 185.9 | 216.8 | 0.00 | 0.00 | 0.07 | 201.36  | 1         | 1             |
| BK CC7_2289 | 12.0  | 5.6  | 18.5 | 393.6 | 286.2 | 500.9 | 0.17 | 0.09 | 0.26 | 60.44   | 0*        | 0*            |
| BK CC7_335  | 11.5  | 6.9  | 16.1 | 91.3  | 79.0  | 103.6 | 0.10 | 0.06 | 0.15 | 53.58   | 0*        | 0*            |
| BK F6-620   | 6.3   | 2.3  | 10.4 | 82.0  | 72.5  | 91.5  | 0.04 | 0.01 | 0.06 | 57.49   | 0*        | 0*            |
| GoyetQ116-1 | 6.5   | n.a. | n.a. | 235.7 | 207.3 | 264.1 | 0.00 | 0.00 | 0.12 | 235.67  | 1         | 1             |
| Kostenki 14 | 7.1   | n.a. | n.a. | 197.4 | 172.7 | 222.1 | 0.00 | 0.00 | 0.02 | 197.43  | 1         | 1             |
| LBK         | 5.1   | n.a. | n.a. | 428.8 | 367.8 | 489.8 | 0.00 | 0.00 | 0.12 | 428.79  | 1         | 1             |
| Loschbour   | 5.2   | n.a. | n.a. | 385.7 | 337.9 | 433.5 | 0.00 | 0.00 | 0.06 | 385.68  | 1         | 1             |
| Malta 1     | 5.2   | n.a. | n.a. | 347.0 | 301.1 | 392.8 | 0.00 | 0.00 | 0.14 | 346.96  | 1         | 1             |
| Oase1       | 4.0   | 1.4  | 6.7  | 82.8  | 69.8  | 95.7  | 0.06 | 0.02 | 0.09 | 39.78   | 0*        | 0*            |
| Sunghir III | 6.3   | n.a. | n.a. | 248.0 | 218.7 | 277.2 | 0.00 | 0.00 | 0.12 | 247.99  | 1         | 1             |
| Sunghir II  | 6.0   | n.a. | n.a. | 248.9 | 218.0 | 279.7 | 0.00 | 0.00 | 0.13 | 248.86  | 1         | 1             |
| Sunghir I   | 5.8   | n.a. | n.a. | 247.0 | 211.8 | 282.1 | 0.00 | 0.00 | 0.12 | 246.96  | 1         | 1             |
| Sunghir IV  | 6.3   | n.a. | n.a. | 242.0 | 213.3 | 270.7 | 0.00 | 0.00 | 0.09 | 241.98  | 1         | 1             |
| Tianyuan    | 6.3   | n.a. | n.a. | 215.2 | 186.2 | 244.2 | 0.00 | 0.00 | 0.14 | 215.19  | 1         | 1             |
| Ust'Ishim   | 10.0  | n.a. | n.a. | 104.3 | 87.7  | 120.9 | 0.00 | 0.00 | 0.04 | 104.29  | 1         | 1             |

|                     |      |      |      |       |       |       |      |      |      |        |           |          |
|---------------------|------|------|------|-------|-------|-------|------|------|------|--------|-----------|----------|
| <b>Vestonice 16</b> | 5.4  | n.a. | n.a. | 301.1 | 264.1 | 338.1 | 0.00 | 0.00 | 0.13 | 301.08 | 1         | 1        |
| <b>Yana_old</b>     | 5.9  | n.a. | n.a. | 261.0 | 229.9 | 292.1 | 0.00 | 0.00 | 0.09 | 260.99 | 1         | 1        |
| <b>Yana_old2</b>    | 43.5 | 0.0  | 90.2 | 255.4 | 223.5 | 287.4 | 0.02 | 0.00 | 0.04 | 236.74 | 8.31E-03* | 1.83E-01 |

1936

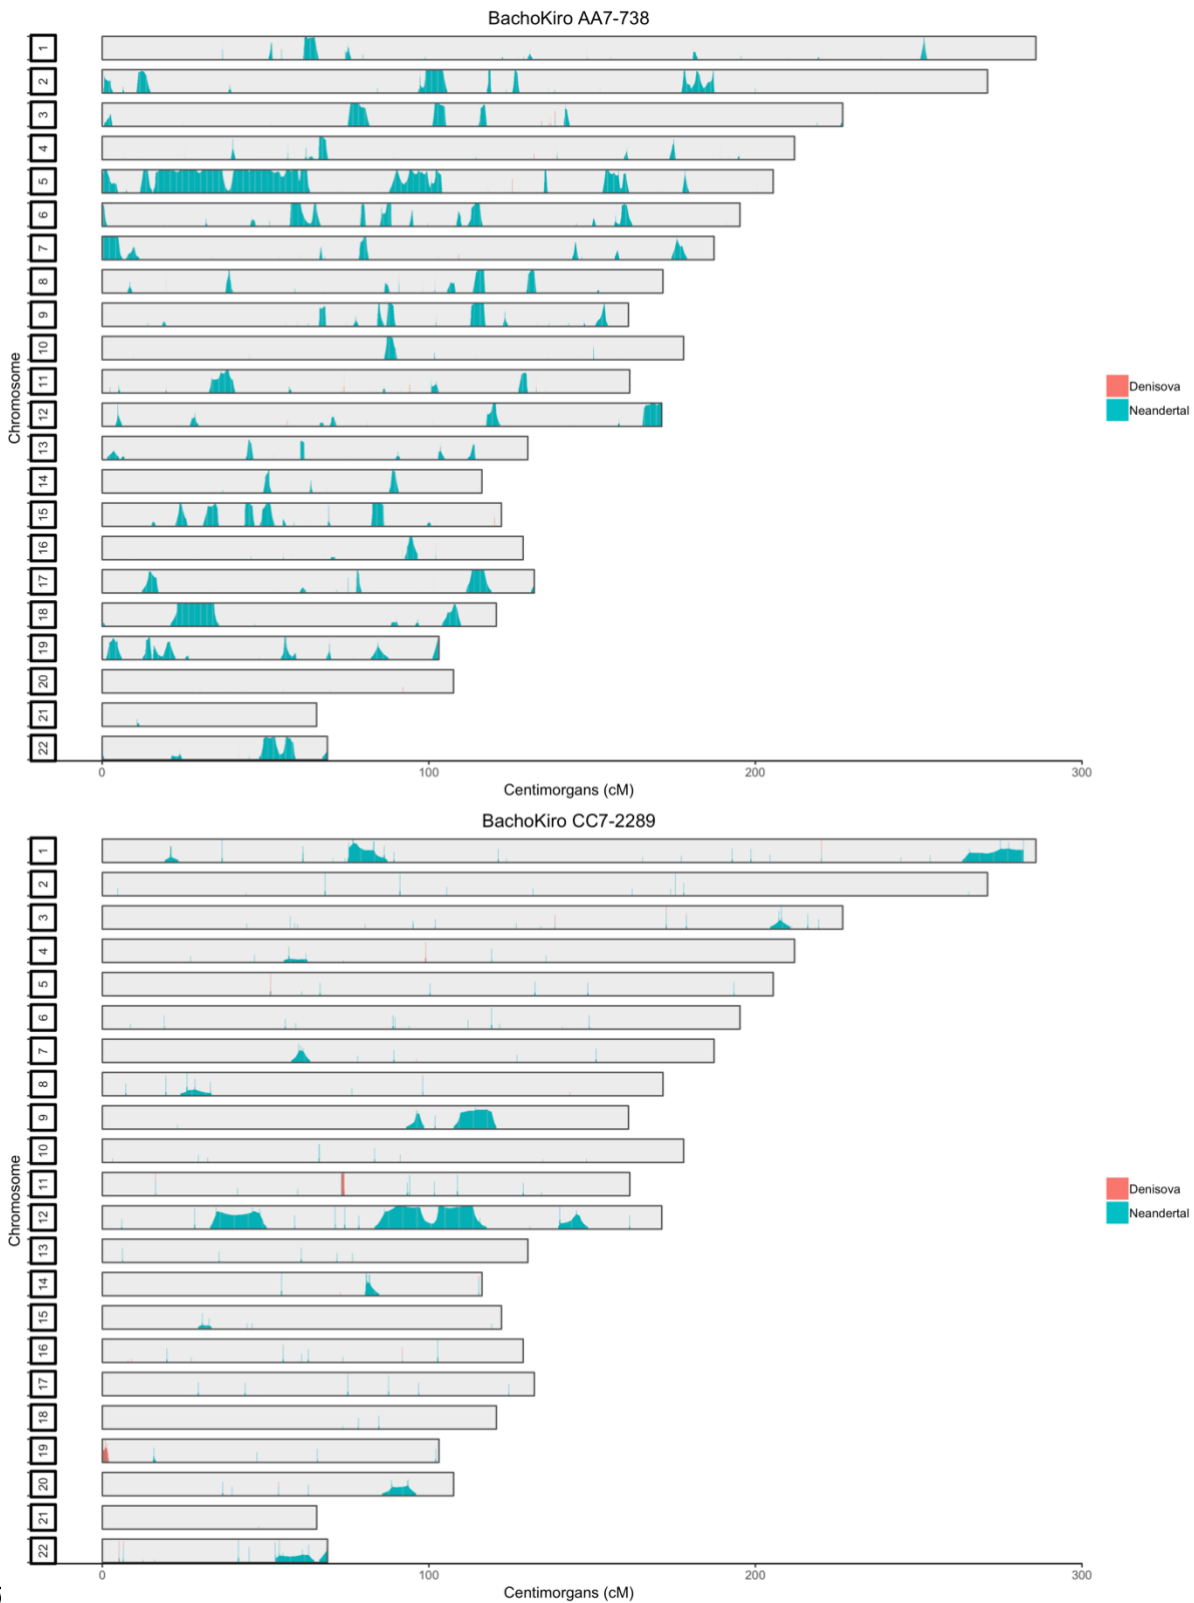

1937  
 1938 **Figure S8.1 Neanderthal introgressed segments in the genomes of Bacho Kiro AA7-738 and**  
 1939 **Bacho Kiro CC7-2289 as inferred by admixfrog.** Neanderthal segments are highlighted in blue  
 1940 and Denisovan segments are highlighted in orange. The height of the segment on each autosome  
 1941 is denoted on the y-axis and corresponds to the probability of the inferred segment.

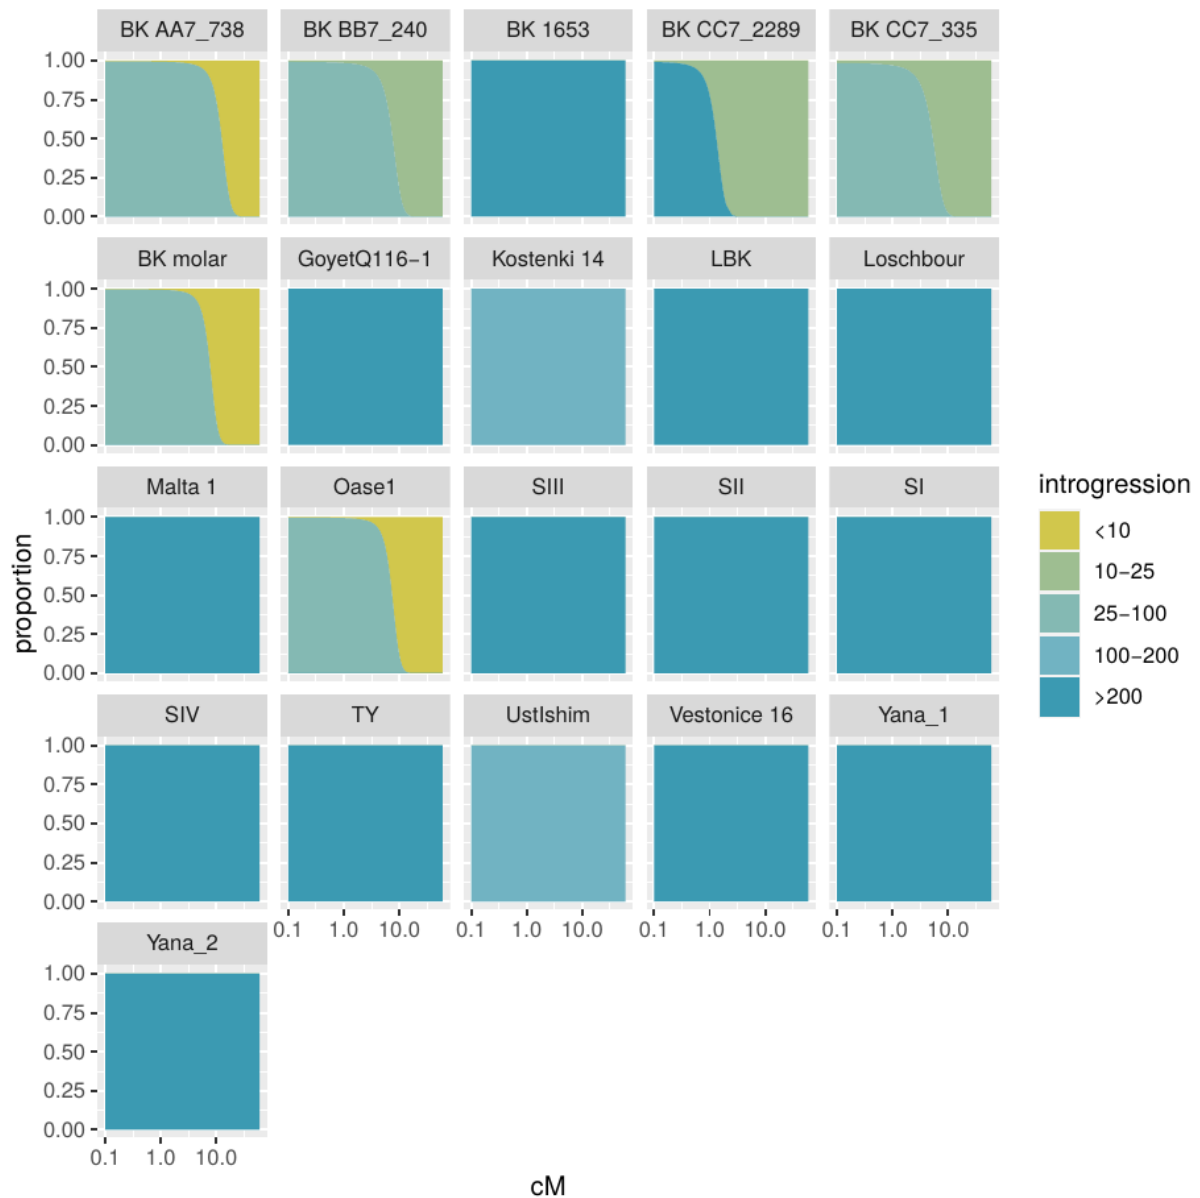

1942 **Figure S8.2 Proportion of fragments (y-axis) originating from different introgression**  
 1943 **events (number of generation indicated by the colors in the legend).** Models with two  
 1944 different introgression events were plotted if supported by a likelihood ratio test  $<0.001$  over  
 1945 models with only one introgression event (Table S8.1).

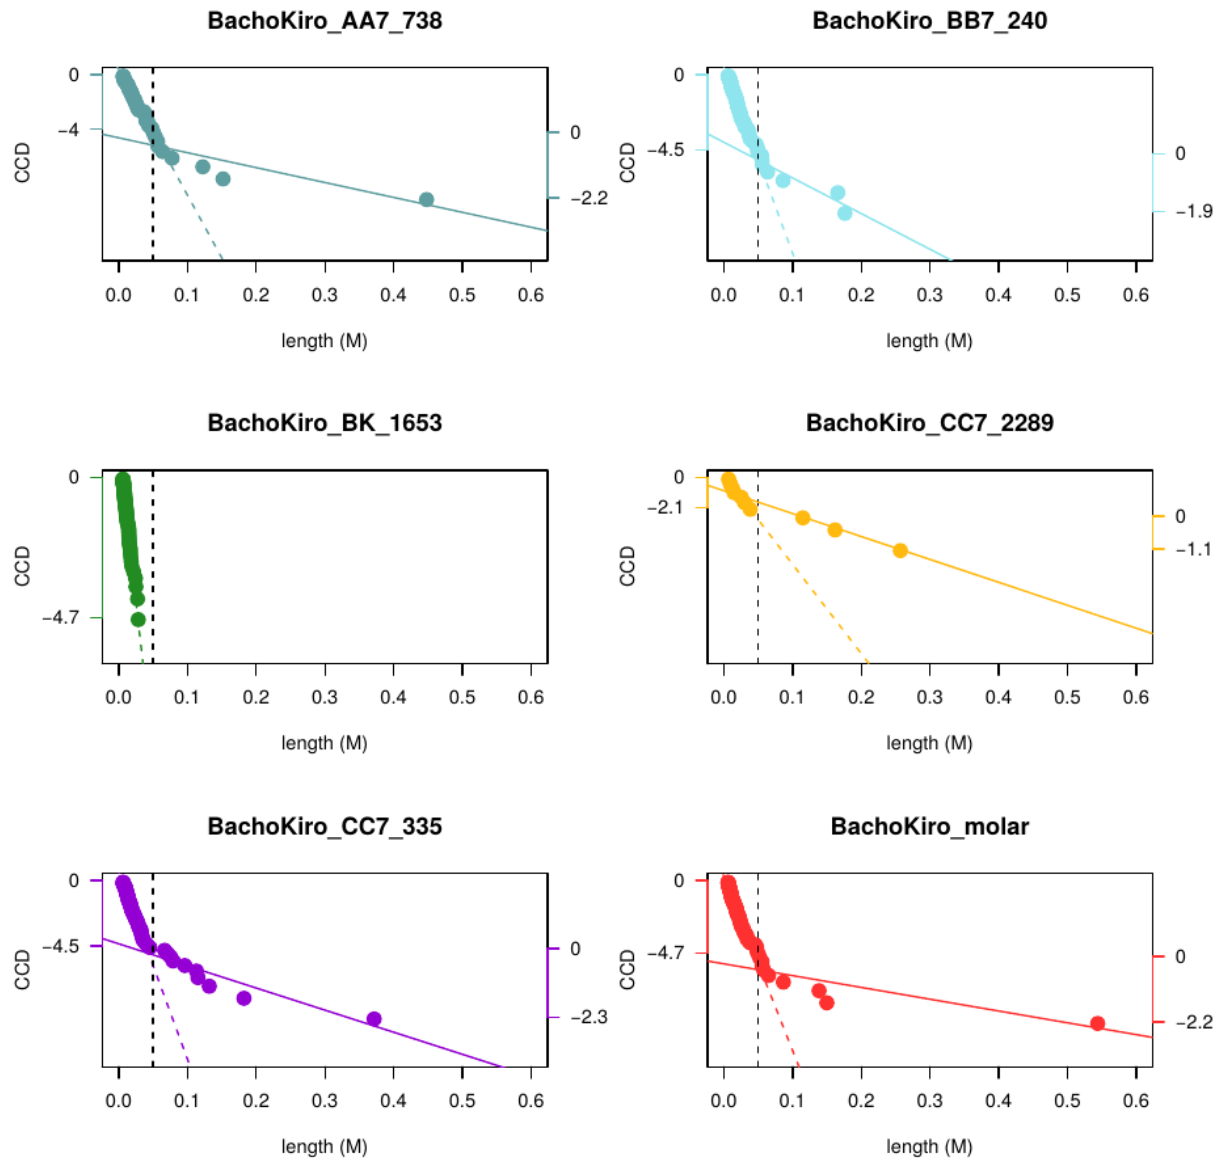

1946  
 1947  
 1948  
 1949  
 1950  
 1951  
 1952  
 1953  
 1954  
 1955

**Figure S8.3 Graphical representation of the relationship between CCD of tracts and tract lengths.** Slopes corresponding to the estimates of the number of generations before the most recent Neandertal introgression in Bacho Kiro (tracts  $>5\text{cM}$ ) and older introgression events, here modelled as a single pulse (tracts  $\leq 5\text{cM}$ ), are shown as continuous and dashed colored lines, respectively. In order to visualize both slopes in the same plot, the CCD of all fragments with length  $>0.5\text{cM}$  is used as y-axis. The corresponding CCD for tracts lower and higher than  $5\text{cM}$  are shown as coloured axes on the left and right of the plots, respectively. The  $5\text{cM}$  threshold is indicated by a vertical dashed line. The x-axis represent the genetic length of the tracts in Morgans.

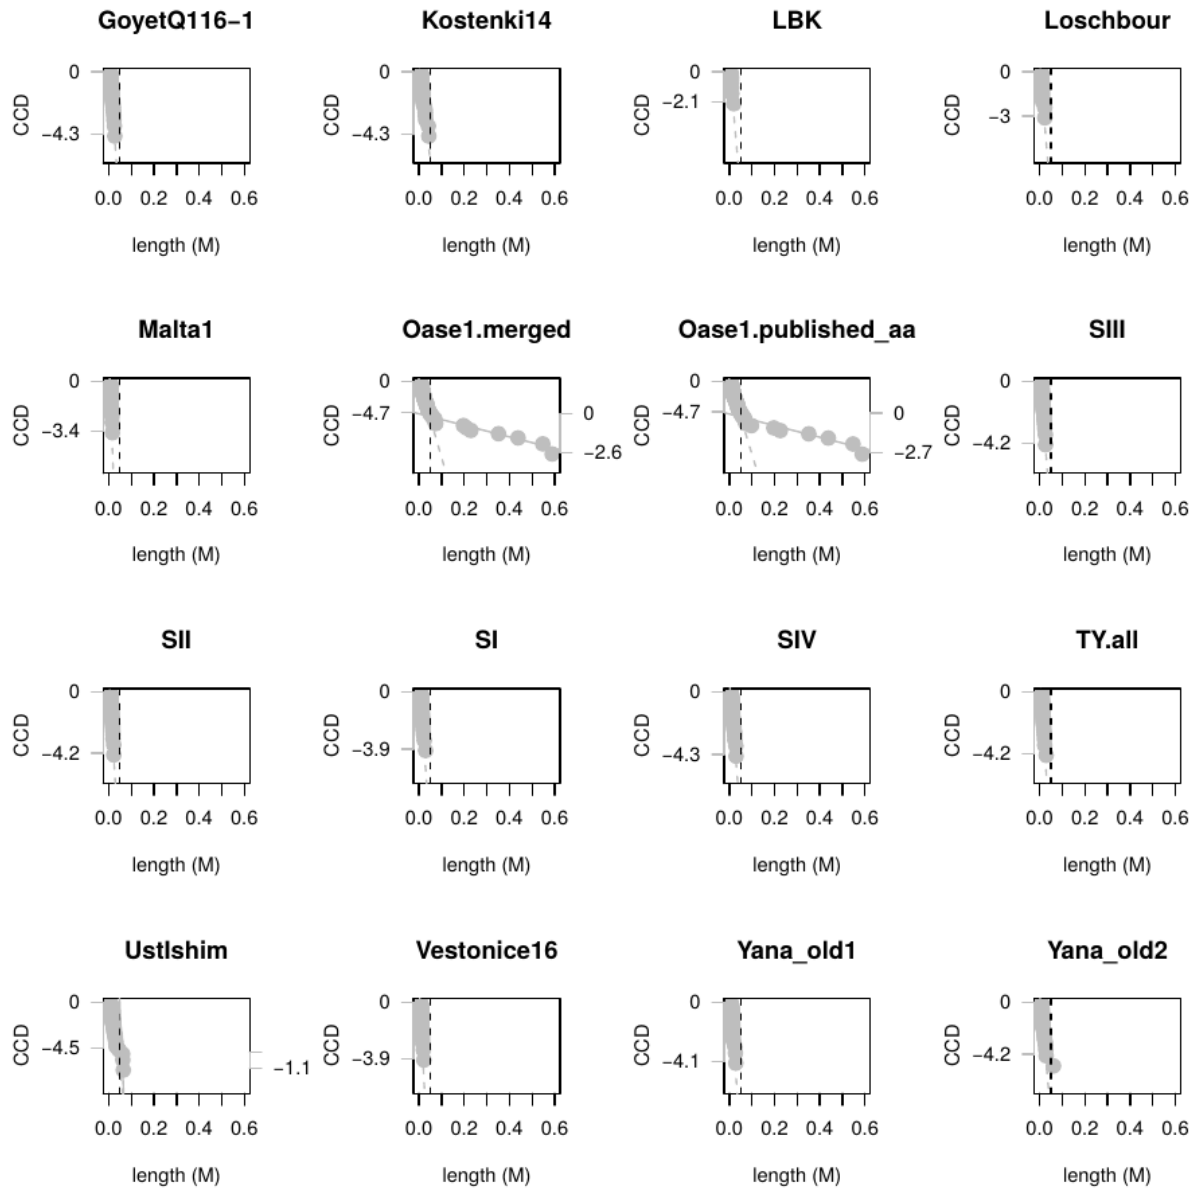

1956

1957 **Figure S8.4 Graphical representation of the relationship between CCD of tracts and tract**

1958 **lengths in other ancient modern humans.**



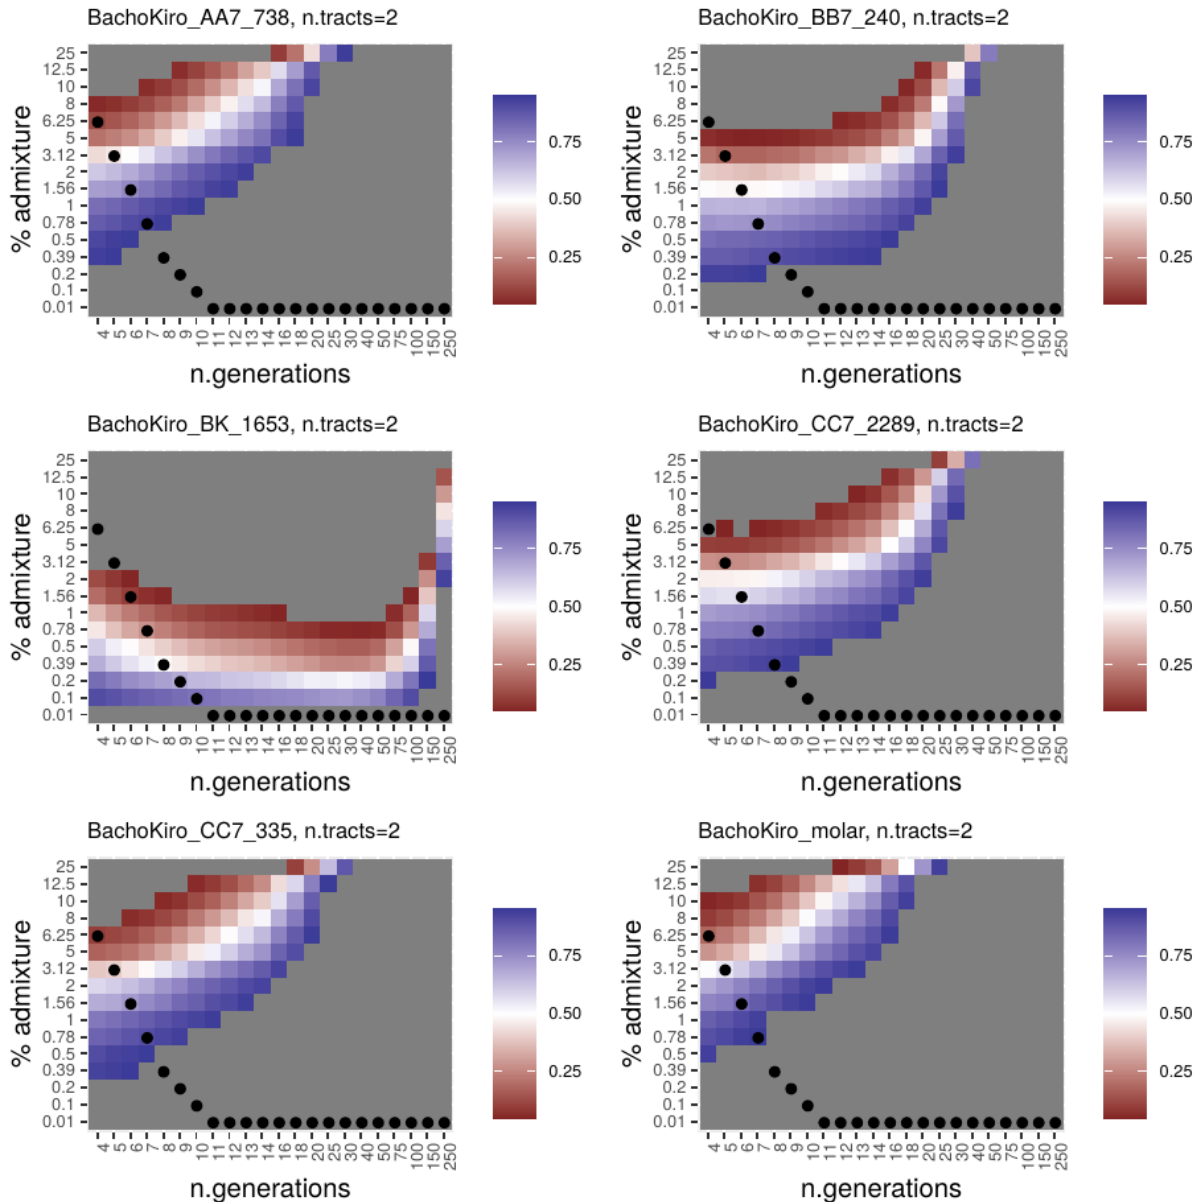

1959 **Figure S8.5 Proportions of the simulations (q) where the two longest Neandertal tracts**  
 1960 **are shorter than for the observed tracts.** White indicates the best fitting combinations of  
 1961 parameters, i.e. combinations of parameters for which the observed data fall at the 50%  
 1962 percentile of the simulations. Combinations of parameters for which the observed data fall out  
 1963 of the 5 and 95 percentiles are shown in grey. Proportions of admixtures corresponding to the  
 1964 introgression of a single Neandertal ancestor are marked as black dots for each number of  
 1965 generations.

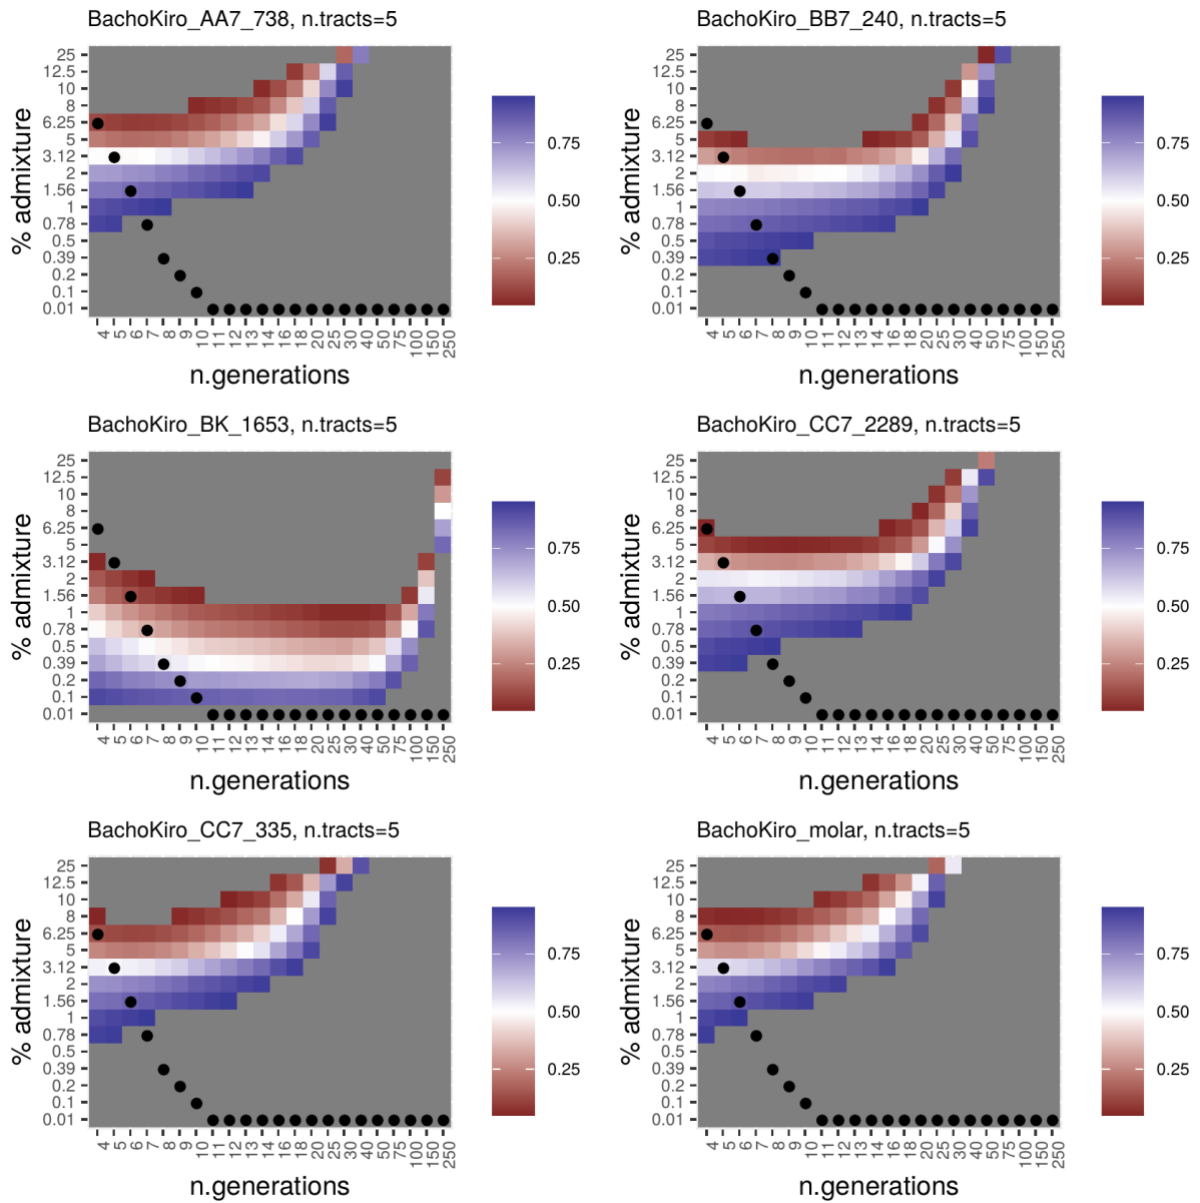

1966

1967

1968

**Figure S8.6 Proportions of the simulations (q) where the five longest Neandertal tracts are shorter than for the observed tracts. Figure description follows as Fig.S8.5.**

## 1969 **Supplementary information 9**

### 1970 **Sharing of Neandertal introgressed segments between Bacho Kiro and** 1971 **present-day individuals**

1972

1973 We wanted to investigate if the Neandertal fragments we detect in Bacho Kiro individuals are  
1974 shared with other ancient and present-day individuals. For ancient individuals (n=32) we  
1975 consider segments longer than 0.2 cM and for modern day non-African individuals (n=229)<sup>1</sup>  
1976 we consider segments longer than 0.05 cM<sup>2</sup> (see Supplementary Information 8). Furthermore,  
1977 we group present-day individuals<sup>1</sup> by population (n=109) to increase the number of segments  
1978 for comparisons. To evaluate the sharing we calculate how well the genomic positions of  
1979 Neandertal segments correlate between Bacho Kiro Cave individuals vs ancient and present-  
1980 day individuals, using the Pearson correlation coefficient, which we calculate in the following  
1981 way:

1982  $p(X,Y) = (\text{observed\_overlap} - \text{expected\_overlap}) / (\text{standard deviation of } X * \text{standard deviation}$   
1983  $\text{of } Y)$

1984  $\text{observed} = \text{overlapping sequence} / \text{callable genome length}$

1985  $\text{expected\_overlap} = (\text{sequence in } X) / \text{callable genome length} * (\text{sequence in } Y) / \text{callable}$   
1986  $\text{genome length}$

1987  $\text{standard deviation of } X \text{ (or } Y) = \text{sqrt}(\text{overlapping sequence} / \text{callable genome length} -$   
1988  $(\text{overlapping sequence} / \text{callable genome length})^2)$

1989 If there is a perfect overlap, the correlation coefficient will be equal to 1 and if there is  
1990 no correlation the coefficient will be equal to 0. This allows us to ask the question: “do  
1991 Neandertal segments in Bacho Kiro individuals overlap more with other present-day and  
1992 ancient individuals than expected by chance?”. If they do, this suggests that the fragments are  
1993 shared because of shared ancestry. In addition, we can evaluate the strength of the correlation  
1994 to different populations. Introgressed Neandertal segments will be subject to drift the same way  
1995 that allele frequencies are. Thus, populations that share more Neandertal segments share more  
1996 drift.

1997 In order to investigate if the fragment sets between Bacho Kiro individuals and other  
1998 genomes overlap more than by chance we performed 500 bootstrap iterations where we  
1999 randomly place the same number of archaic fragments of the same size as in the analyzed  
2000 genomes in the genomes of the Bacho Kiro individuals. If fragments overlap more than this,  
2001 we conclude that the two genomes share ancestry. Furthermore, the magnitude of the correlation

2002 coefficient will show if archaic segments in Bacho Kiro individuals are shared more with some  
2003 present-day human populations than others.

2004 Note that the amount of Neandertal segments in the genome is positively correlated with  
2005 local recombination rate (Spearman's rank correlation coefficient = 0.15,  $p$ val < 4.46e-54)<sup>3,4</sup>.  
2006 However, because recombination maps between different populations differ<sup>5</sup> and have changed  
2007 over 35-45,000 years, we used homogeneous recombination rates for the tests.

2008 Table S8.1 shows the mean correlation coefficient for each Bacho Kiro individual vs  
2009 each "Super population", *i.e.* America, CentralAsia/Siberia, EastAsia, Oceania, SouthAsia,  
2010 WestEurasia. The segments in the later Bacho Kiro Cave individual *BK1653* correlate more  
2011 with Neandertal segments in West Eurasia than the Neandertal segments in IUP Bacho Kiro  
2012 Cave individuals do. In contrast, the Neandertal segments in the IUP Bacho Kiro Cave  
2013 individuals correlate more with Neandertal segments in present-day East Asian individuals (Fig.  
2014 S9.1). The correlation coefficients when comparing Bacho Kiro individuals (segments shorter  
2015 than 5 cM) with each individual SGDP population and 32 ancient individuals are shown in Fig.  
2016 S9.2.

2017 Segments longer than 5 cM found in IUP Bacho Kiro Cave individuals show very low  
2018 correlation with present-day individuals (see Fig. S9.3). In fact, in all Bacho Kiro Cave  
2019 individuals, except *CC7-2289* where we have little data, the genomic position of segments  
2020 shorter than 5cM correlates significantly more with segments in present-day populations than  
2021 segments which are longer than 5 cM (see Fig. S9.4).

2022

## 2023 **References SI9:**

- 2024 1 Mallick, S. *et al.* The Simons Genome Diversity Project: 300 genomes from 142 diverse  
2025 populations. *Nature* **538**, 201-206, doi:10.1038/nature18964 (2016).
- 2026 2 Peter, B. M. 100,000 years of gene flow between Neandertals and Denisovans in the  
2027 Altai mountains. *bioRxiv* (2020).
- 2028 3 Skov, L. *et al.* The nature of Neanderthal introgression revealed by 27,566 Icelandic  
2029 genomes. *Nature* **582**, 78-83, doi: 0.1038/s41586-020-2225-9 (2020).
- 2030 4 Schumer, M. *et al.* Natural selection interacts with recombination to shape the evolution  
2031 of hybrid genomes. *Science* **360**, 656-660, doi: 10.1126/science.aar3684 (2018).
- 2032 5 Kong, A. *et al.* Fine-scale recombination rate differences between sexes, populations  
2033 and individuals. *Nature* **467**, 1099-1103, doi: 10.1038/nature09525 (2010).

2034 **Table S9.1 Correlation coefficient of overlapping segments between Bacho Kiro Cave**  
 2035 **individuals and present-day super populations groups from SGDP<sup>1</sup>.** The mean correlation  
 2036 coefficient for each super population are reported along with the 95% confidence intervals in  
 2037 brackets. Here we use tracts  $\leq 5\text{cM}$ , thus representative of older introgression events. Bacho  
 2038 Kiro *CC7-2289* is highlighted in grey due to low amounts of data.  
 2039

| Individual         | America          | CentralAsiaSiberia | EastAsia         | Oceania          | SouthAsia        | WestEurasia      |
|--------------------|------------------|--------------------|------------------|------------------|------------------|------------------|
| BachoKiro_AA7_738  | 0.08 (0.07-0.09) | 0.08 (0.07-0.09)   | 0.09 (0.08-0.1)  | 0.08 (0.05-0.11) | 0.06 (0.05-0.07) | 0.04 (0.04-0.04) |
| BachoKiro_BB7_240  | 0.09 (0.08-0.1)  | 0.08 (0.07-0.09)   | 0.1 (0.09-0.11)  | 0.08 (0.06-0.1)  | 0.07 (0.06-0.08) | 0.04 (0.04-0.04) |
| BachoKiro_BK_1653  | 0.08 (0.08-0.08) | 0.08 (0.07-0.09)   | 0.07 (0.06-0.08) | 0.06 (0.04-0.08) | 0.08 (0.07-0.09) | 0.11 (0.1-0.12)  |
| BachoKiro_CC7_2289 | 0 (-0.01-0.01)   | 0.01 (0.01-0.01)   | 0.03 (0.02-0.04) | 0.02 (0.01-0.03) | 0.03 (0.02-0.04) | 0.02 (0.02-0.02) |
| BachoKiro_CC7_335  | 0.09 (0.08-0.1)  | 0.09 (0.08-0.1)    | 0.12 (0.11-0.13) | 0.1 (0.08-0.12)  | 0.08 (0.07-0.09) | 0.04 (0.04-0.04) |
| BachoKiro_F6_620   | 0.1 (0.09-0.11)  | 0.09 (0.08-0.1)    | 0.1 (0.09-0.11)  | 0.09 (0.06-0.12) | 0.06 (0.05-0.07) | 0.05 (0.05-0.05) |

2040

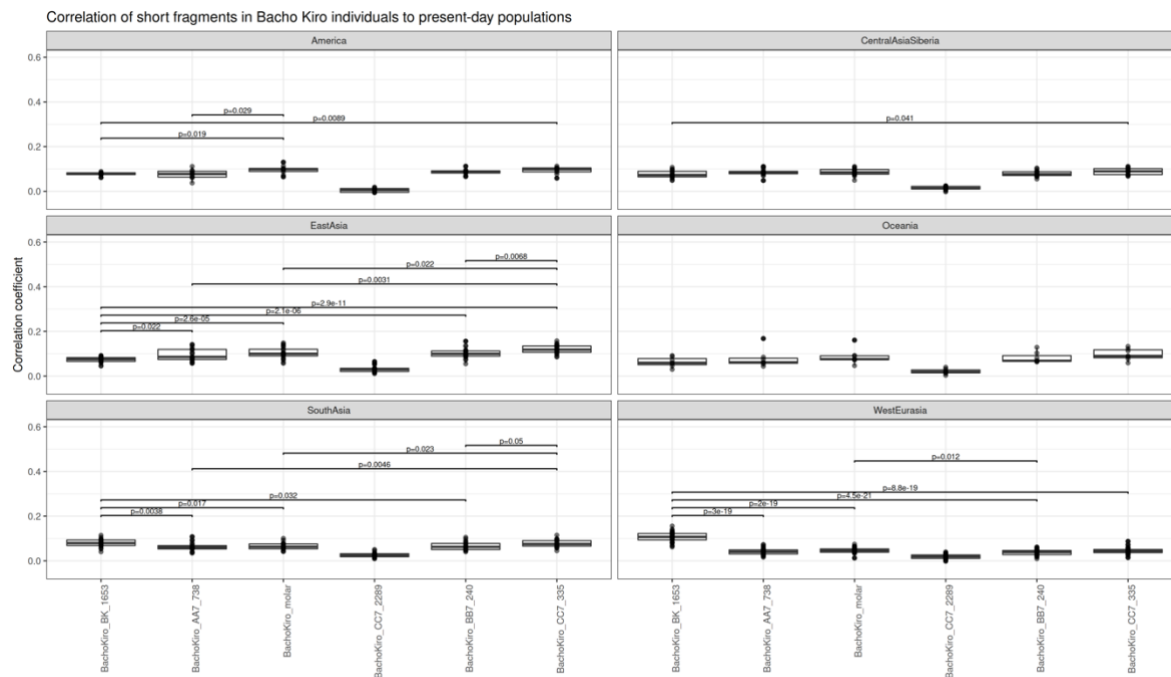

2041  
 2042 **Figure S9.1 Correlation coefficient of overlapping segments between Bacho Kiro Cave**  
 2043 **individuals and present-day super populations.** The mean correlation coefficient for each  
 2044 super population is reported for each Bacho Kiro Cave individual (black horizontal bar). Each  
 2045 point is a population from the super population (n=10 for America, n=15 for  
 2046 CentralAsiaSiberia, n=22 for EastAsia, n=7 for Oceania, n = 19 for SouthAsia, n = 36 for  
 2047 WestEurasia). The top and bottom part of the box indicates the 75% and 25% quantile  
 2048 respectively. We use tracts  $\leq 5\text{cM}$ . The p-values for each Wilcoxon signed-rank two-sided test  
 2049 are reported if significant ( $<0.05$ ). We do not use the individual Bacho Kiro CC7-2289 to  
 2050 the low amounts of data.

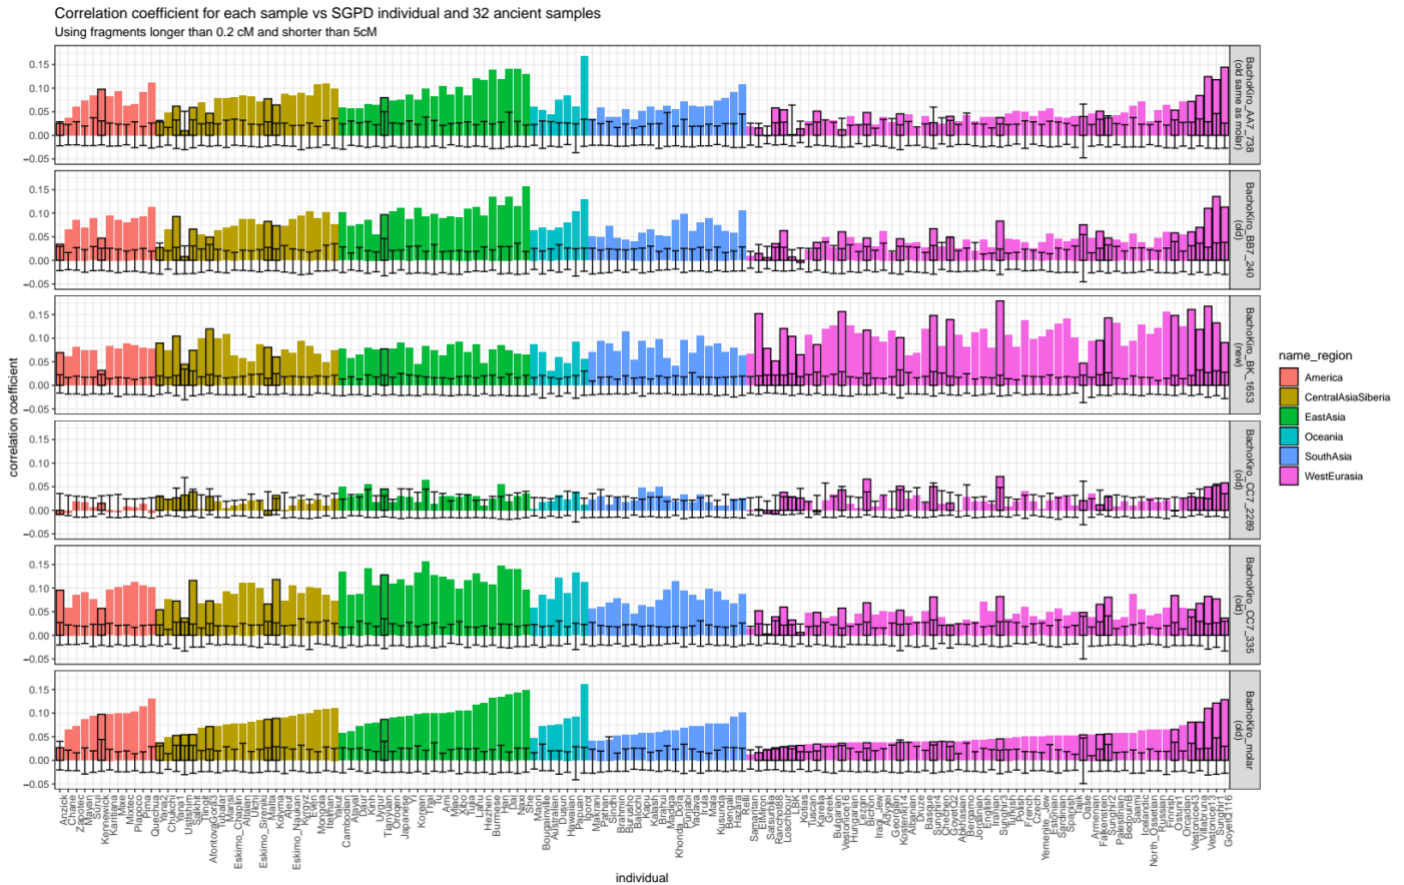

2051  
 2052 **Figure S9.2 Correlation coefficient of overlapping segments between Bacho Kiro Cave**  
 2053 **individuals and present-day population and ancient individuals.** The mean correlation  
 2054 coefficient between tracts  $\leq 5\text{cM}$  in BachoKiro individuals, thus representative of older  
 2055 introgression events (n=138 for BachoKiro\_BB7\_240, n=66 for BachoKiro\_AA7\_738, n=153  
 2056 for BachoKiro\_molar, n=137 for BachoKiro\_CC7\_335, n=11 for BachoKiro\_CC7\_2289,  
 2057 n=257 for BachoKiro\_BK\_1653) and all tracts in present day populations and ancient  
 2058 individuals (mean n=1038, min n = 385, max n = 7535) is shown as a bar. The color of the bar  
 2059 indicates the super population. The black error bars show the 95% confidence intervals when  
 2060 we randomly place fragments in the genome (500 iterations) with the middle of the error bar  
 2061 being the mean correlation coefficient. Ancient individuals are highlighted with a black outline.

2062

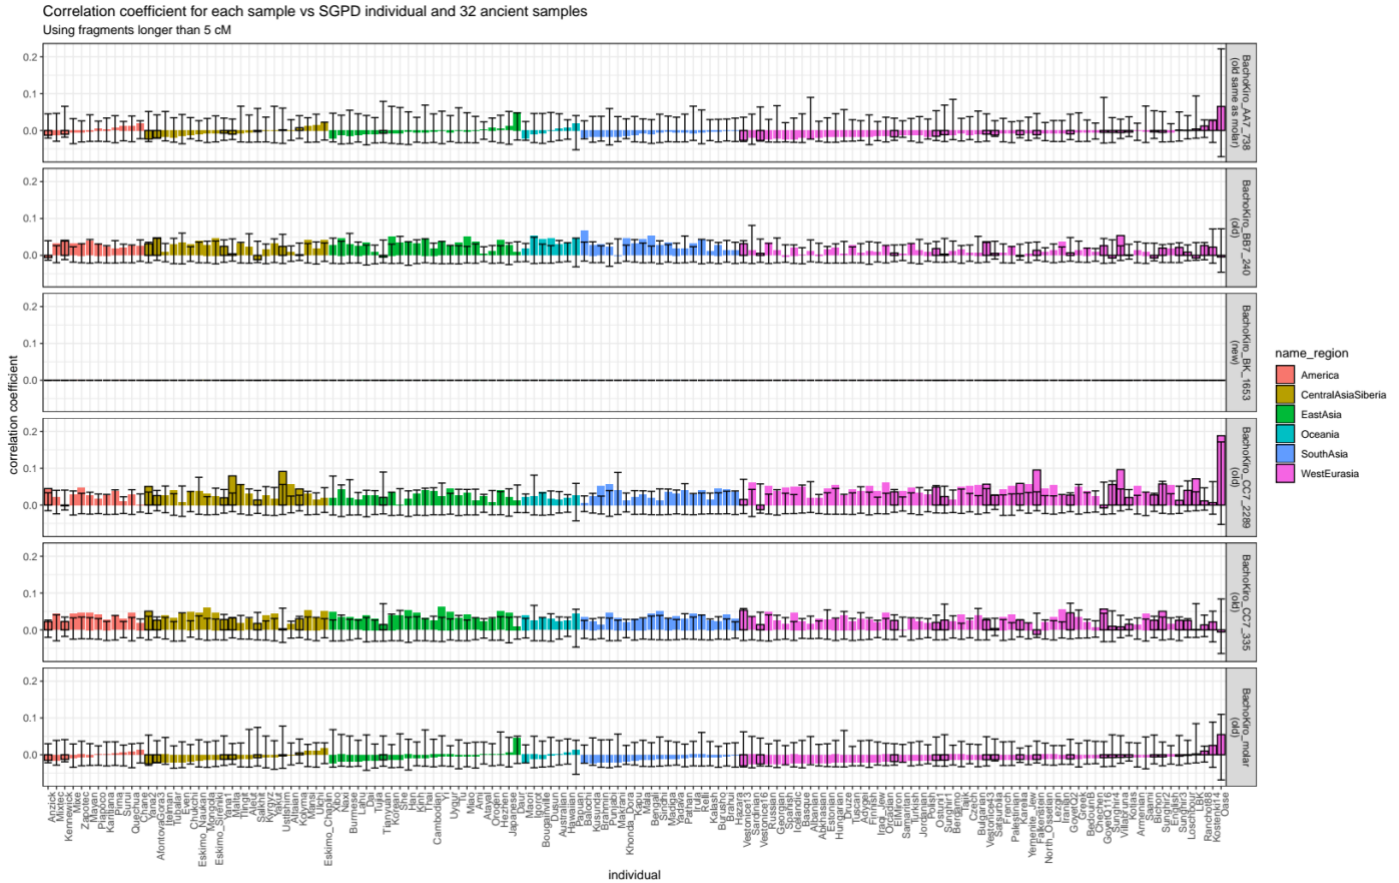

2063

2064

**Figure S9.3 Correlation coefficient of overlapping segments between Bacho Kiro Cave**

2065

**individuals and present-day population and ancient individuals.** The mean correlation

2066

coefficient between tracts  $\geq 5\text{cM}$  in BachoKiro individuals, thus representative of more recent

2067

introgression events ( $n=8$  for BachoKiro\_BB7\_240,  $n=7$  for BachoKiro\_AA7\_738,  $n=9$  for

2068

BachoKiro\_molar,  $n=10$  for BachoKiro\_CC7\_335,  $n=3$  for BachoKiro\_CC7\_2289,  $n=0$  for

2069

BachoKiro\_BK\_1653) and all tracts in present day populations and ancient individuals (mean

2070

$n=1038$ ,  $\text{min } n = 385$ ,  $\text{max } n = 7535$ ) is shown as a bar. The color of the bar indicates the super

2071

population. The black error bars show the 95% confidence intervals when we randomly place

2072

fragments in the genome (500 iterations) with the middle of the error bar being the mean

2073

correlation coefficient. Ancient individuals are highlighted with a black outline.



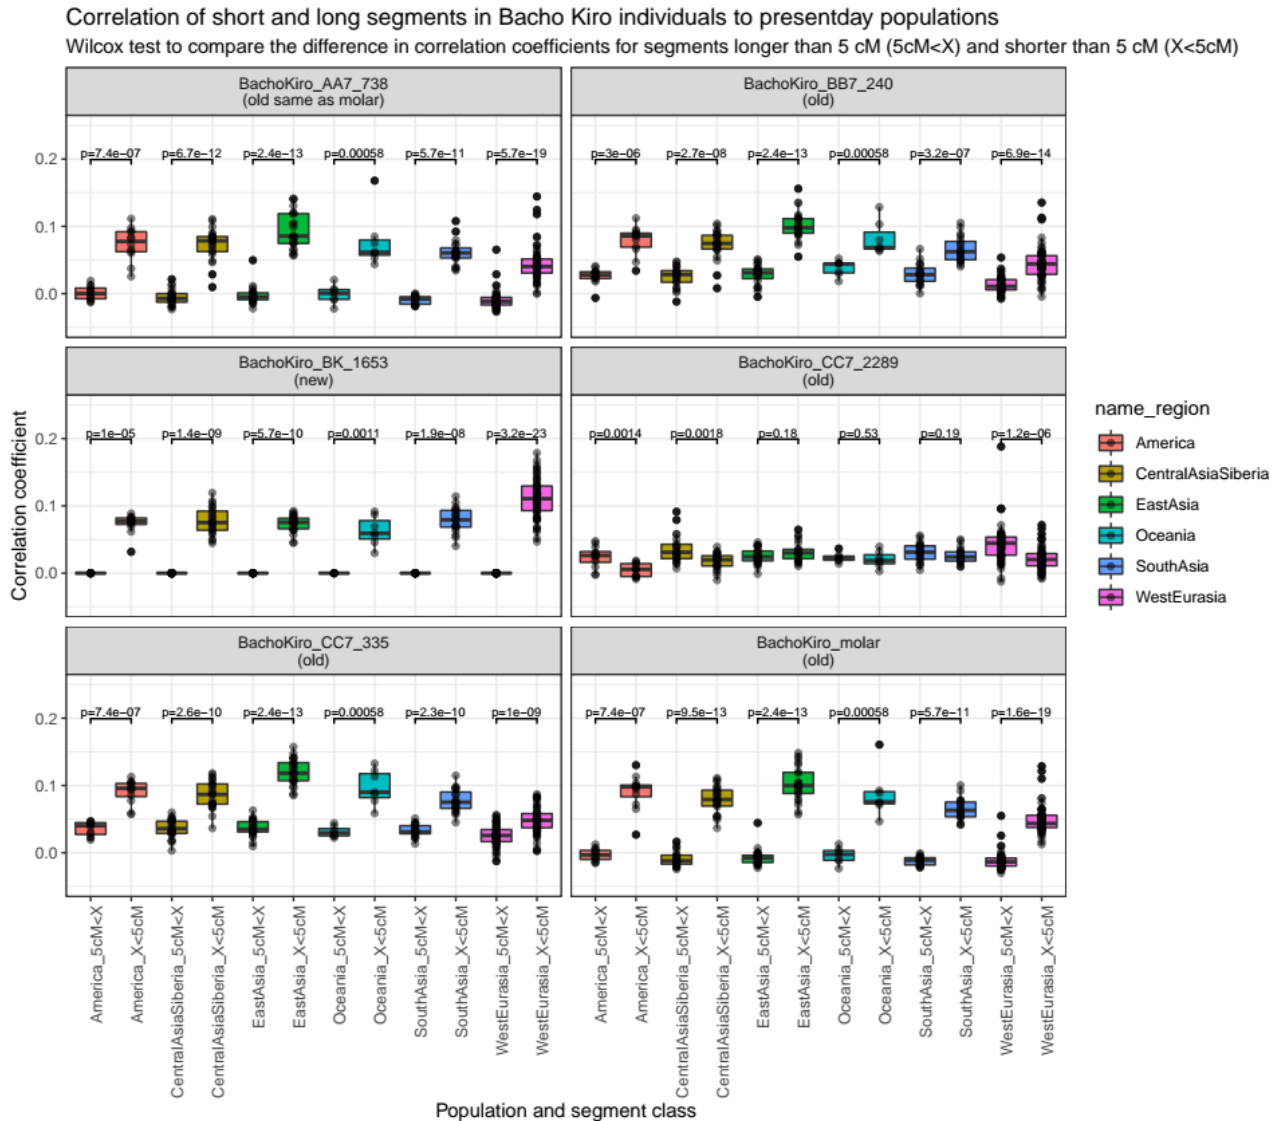

2075 **Figure S9.4 Correlation coefficient of overlapping segments between Bacho Kiro Cave**  
 2076 **individuals and present-day population for segments longer and shorter than 5cM.** For  
 2077 each super population we compare the correlation coefficient of segments from Bacho Kiro  
 2078 individuals longer than 5cM vs the correlation coefficient of segments from Bacho Kiro  
 2079 individuals shorter than 5cM (n=10 for America, n=15 for CentralAsiaSiberia, n=22 for  
 2080 EastAsia, n=7 for Oceania, n = 19 for SouthAsia, n = 36 for WestEurasia). The top and bottom  
 2081 part of the box plot indicates the 75% and 25% quantile respectively. The pvalues for each  
 2082 Wilcoxon signed-rank two-sided test are reported if significant (<0.05).

## 2083 **Supplementary Information 10**

### 2084 **Neandertal deserts**

2085

2086 Previous studies of Neandertal introgression concluded that Neandertal introgressed fragments  
2087 are heterogeneously distributed throughout the genome in modern day non-African  
2088 populations<sup>1,2</sup>. Strikingly, this heterogeneity includes large regions that are nearly devoid of  
2089 any Neandertal introgressed DNA. These so-called “Neandertal deserts” have been speculated  
2090 to be regions where Neandertal DNA was removed by selection after introgression occurred,  
2091 and thus may represent regions with important functional differences or even incompatibilities  
2092 between Neandertals and modern humans. A subsequent analysis of 35 Melanesian individuals  
2093 found that several of these deserts are also significantly depleted of Denisovan introgression,  
2094 suggesting archaic DNA has been removed from the human genome in at least two events<sup>3,4</sup>.

2095 However, these analyses were performed on contemporary populations, making it  
2096 difficult to resolve the timing of the formation of these Neandertal deserts; an important  
2097 characteristic for considering models of selection. Genome-wide data from early modern  
2098 humans may help to resolve this timing - e.g., we can ask the question “were these deserts  
2099 present within 10,000 years following introgression?” In addition, the existence of very recent  
2100 introgression events into such early modern humans may allow us to investigate the dynamics  
2101 of desert formation on very short time scales, as little as a few generations. We therefore  
2102 examined the overlap of Neandertal introgressed fragments in the three IUP Bacho Kiro Cave  
2103 individuals, plus *Oase1*, with six previously identified Neandertal deserts<sup>3</sup>. Strikingly, these  
2104 individuals carry almost no Neandertal DNA in the deserts (249 Kb out of 898 Mb of  
2105 introgressed sequence). To determine if this lack of overlap could have occurred by chance, we  
2106 calculated an empirical p-value by shifting the location of the deserts along the genome,  
2107 eventually covering the entire genome. In 1 out of 251 such permutations, the overlap of  
2108 Neandertal fragments and deserts was greater than the observed overlap, leading to an adjusted  
2109 empirical p-value of 0.0079. Assuming an introgression date of 55,000 years ago<sup>5,6</sup> we can  
2110 determine that the Neandertal deserts had already been established by approximately 10,000  
2111 years after introgression.

2112 To examine desert formation in the more recent introgression event, we performed the  
2113 same analysis on all introgressed fragments larger than 5cM. We use this threshold as described  
2114 in Supplementary Information 8, since fragments longer than 5cM are unlikely to originate in  
2115 the older introgression event. To maximize power, we also included fragments from the *Oase1*

2116 individual, which experienced a similar recent introgression event. Strikingly, none of these  
2117 large fragments overlap with previously identified deserts. However, when performing our  
2118 permutation test, a substantial proportion of permutations (36 out of 251) also yielded no  
2119 overlap, giving an adjusted empirical p-value of 0.147. Therefore, although we have no  
2120 evidence of Neandertal DNA in the deserts as recently as 6-10 generations post-admixture, we  
2121 also cannot reject that this occurs by chance. It is likely that the discovery of even a few  
2122 additional individuals with recent introgression will allow the resolution of this question.

2123

2124 **References SI10:**

- 2125 1 Vernot, B. & Akey, J. M. Resurrecting surviving Neandertal lineages from modern  
2126 human genomes. *Science* **343**, 1017-1021, doi:10.1126/science.1245938 (2014).
- 2127 2 Sankararaman, S. *et al.* The genomic landscape of Neanderthal ancestry in present-day  
2128 humans. *Nature* **507**, 354-357, doi: 10.1038/nature12961 (2014).
- 2129 3 Vernot, B. *et al.* Excavating Neandertal and Denisovan DNA from the genomes of  
2130 Melanesian individuals. *Science* **352**, 235-239, doi:10.1126/science.aad9416 (2016).
- 2131 4 Sankararaman, S., Mallick, S., Patterson, N. & Reich, D. The Combined Landscape of  
2132 Denisovan and Neanderthal Ancestry in Present-Day Humans. *Curr. Biol.* **26**, 1241-  
2133 1247, doi:10.1016/j.cub.2016.03.037 (2016).
- 2134 5 Sankararaman, S., Patterson, N., Li, H., Paabo, S. & Reich, D. The date of interbreeding  
2135 between Neandertals and modern humans. *PLoS Genet* **8**, e1002947,  
2136 doi:10.1371/journal.pgen.1002947 (2012).
- 2137 6 Fu, Q. *et al.* Genome sequence of a 45,000-year-old modern human from western  
2138 Siberia. *Nature* **514**, 445-449, doi:10.1038/nature13810 (2014).
